# Supplementary material
Source: PubMed Central journal article supplement (PMC7961472)
Supplement: jamapediatr-e206826-s001.pdf [file jamapediatr-e206826-s001.pdf]

## Supplementary Online Content

Ramaswamy VV, Bandyopadhyay T, Nanda D, et al. Assessment of postnatal corticosteroids for the prevention of bronchopulmonary dysplasia in preterm neonates: a systematic review and network meta-analysis. *JAMA Pediatr*. Published online March 15, 2021. doi:10.1001/jamapediatrics.2020.6826

**eFigure 1.** Literature Search/PRISMA Flow

**eFigure 2.** Mean Gestational Age of the Enrolled Neonates

**eFigure 3.** Risk of Bias Summary and Graph of the Included Trials

**eFigure 4.** Direct Evidence from the Pair Wise Comparisons for the Primary Outcome BPD or Mortality at 36 Weeks' PMA

**eFigure 5.** Split Between Direct and Indirect Evidence for the Primary Outcome BPD or Mortality at 36 Weeks' PMA

**eFigure 6.** Network Plot for BPD at 36 Weeks' PMA (A), SUCRA Plot with SUCRA Values (%) for BPD at 36 Weeks' PMA (B), and Forest Plot Depicting the Network Estimates [RR (95% CrI)] of the Various Interventions with "Placebo" as the Common Comparator for BPD at 36 Weeks' PMA (C)

**eFigure 7.** League Plot Depicting the Network Estimates [RR (95% CrI)] of Postnatal Corticosteroids Comparisons for BPD at 36 Weeks' PMA

**eFigure 8.** Direct Evidence from the Pair Wise Comparisons for BPD at 36 Weeks' PMA

**eFigure 9.** Split Between Direct and Indirect Evidence for BPD at 36 Weeks' PMA

**eFigure 10.** Network Plot for BPD at 28 Days (A), SUCRA Plot with SUCRA Values (%) for BPD at 28 Days (B), and Forest Plot Depicting the Network Estimates [RR (95% CrI)] of the Various Interventions with "Placebo" as the Common Comparator for BPD at 28 Days (C)

**eFigure 11.** League Plot Depicting the Network Estimates [RR (95% CrI)] of Postnatal Corticosteroids Comparisons for BPD at 28 Days

**eFigure 12.** Direct Evidence from the Pair Wise Comparisons for BPD at 28 Days

**eFigure 13.** Split Between Direct and Indirect Evidence for BPD at 28 Days

**eFigure 14.** Network Plot (A), SUCRA Plot with SUCRA Values (%) (B), and Forest Plot Depicting the Network Estimates [RR (95% CrI)] of the Various Interventions with "Placebo" as the Common Comparator for Mortality (C)

**eFigure 15.** League Plot Depicting the Network Estimates [RR (95% CrI)] of Postnatal Corticosteroids Comparisons for Mortality

**eFigure 16.** Direct Evidence from the Pair Wise Comparisons for Mortality

**eFigure 17.** Split Between Direct and Indirect Evidence for Mortality

**eFigure 18.** Network Plot for BPD (A), SUCRA Plot with SUCRA Values (%) (B), and Forest Plot Depicting the Network Estimates [RR (95% CrI)] of the Various Interventions with “Placebo” as the Common Comparator for Successful Extubation (C)

**eFigure 19.** League Plot Depicting the Network Estimates [RR (95% CrI)] of Postnatal Corticosteroids Comparisons for Successful Extubation

**eFigure 20.** Direct Evidence from the Pair Wise Comparisons for Successful Extubation

**eFigure 21.** Split Between Direct and Indirect Evidence for Successful Extubation

**eFigure 22.** Network Plot (A), SUCRA Plot with SUCRA Values (%) (B), and Forest Plot Depicting the Network Estimates [RR (95% CrI)] of the Various Interventions with “LaMdx” as the Common Comparator for NDI at 18-24 Months (C)

**eFigure 23.** League Plot Depicting the Network Estimates [RR (95% CrI)] of Postnatal Corticosteroids Comparisons for NDI at 18-24 Months

**eFigure 24.** Direct Evidence from the Pair Wise Comparisons for NDI at 18-24 Months

**eFigure 25.** Split Between Direct and Indirect Evidence for NDI at 18-24 Months

**eFigure 26.** Network Plot (A), SUCRA Plot with SUCRA Values (%) (B), and Forest Plot Depicting the Network Estimates [RR (95% CrI)] of the Various Interventions with “Placebo” as the Common Comparator for GI Perforation (C)

**eFigure 27.** League Plot Depicting the Network Estimates [RR (95% CrI)] of Postnatal Corticosteroids Comparisons for GI Perforation

**eFigure 28.** Direct Evidence from the Pair Wise Comparisons for GI Perforation

**eFigure 29.** Split Between Direct and Indirect Evidence for GI Perforation

**eFigure 30.** Network Plot (A), SUCRA Plot with SUCRA Values (%) (B), and Forest Plot Depicting the Network Estimates [RR (95% CrI)] of the Various Interventions with “Placebo” as the Common Comparator for Hypertrophic Cardiomyopathy (C)

**eFigure 31.** League Plot Depicting the Network Estimates [RR (95% CrI)] of Postnatal Corticosteroids Comparisons for Hypertrophic Cardiomyopathy

**eFigure 32.** Direct Evidence from the Pair Wise Comparisons for Hypertrophic Cardiomyopathy

**eFigure 33.** Network Plot (A), SUCRA Plot with SUCRA Values (%) (B), and Forest Plot Depicting the Network Estimates [RR (95% CrI)] of the Various Interventions with “Placebo” as the Common Comparator for Hypertension (C)

**eFigure 34.** League Plot Depicting the Network Estimates [RR (95% CrI)] of Postnatal Corticosteroids Comparisons for Hypertension

**eFigure 35.** Direct Evidence from the Pair Wise Comparisons for Hypertension

**eFigure 36.** Split Between Direct and Indirect Evidence for Hypertension

**eFigure 37.** Network Plot (A), SUCRA Plot with SUCRA Values (%) (B), and Forest Plot Depicting the Network Estimates [RR (95% CrI)] of the Various Interventions with “Placebo” as the Common Comparator for Sepsis (C)

**eFigure 38.** League Plot Depicting the Network Estimates [RR (95% CrI)] of Postnatal Corticosteroids Comparisons for Sepsis

**eFigure 39.** Direct Evidence from the Pair Wise Comparisons for Sepsis

**eFigure 40.** Split Between Direct and Indirect Evidence for Sepsis

**eFigure 41.** Network Plot (A), SUCRA Plot with SUCRA Values (%) (B), and Forest Plot Depicting the Network Estimates [RR (95% CrI)] of the Various Interventions with “Placebo” as the Common Comparator for Severe ROP (C)

**eFigure 42.** League Plot Depicting the Network Estimates [RR (95% CrI)] of Postnatal Corticosteroids Comparisons for Severe ROP

**eFigure 43.** Direct Evidence from the Pair Wise Comparisons for Severe ROP

**eFigure 44.** Split Between Direct and Indirect Evidence for Severe ROP

**eFigure 45.** Network Plot (A), SUCRA Plot with SUCRA Values (%) (B), and Forest Plot Depicting the Network Estimates [RR (95% CrI)] of the Various Interventions with “Placebo” as the Common Comparator for NEC (C)

**eFigure 46.** League Plot Depicting the Network Estimates [RR (95% CrI)] of Postnatal Corticosteroids Comparisons for NEC

**eFigure 47.** Direct Evidence from the Pair Wise Comparisons for NEC

**eFigure 48.** Network Plot (A), SUCRA Plot with SUCRA Values (%) (B), and Forest Plot Depicting the Network Estimates [RR (95% CrI)] of the Various Interventions with “Placebo” as the Common Comparator for IVH>II (C)

**eFigure 49.** League Plot Depicting the Network Estimates [RR (95% CrI)] of Postnatal Corticosteroids Comparisons for IVH >II

**eFigure 50.** Direct Evidence from the Pair Wise Comparisons for IVH >II

**eFigure 51.** Network Plot (A), SUCRA Plot with SUCRA Values (%) (B), and Forest Plot Depicting the Network Estimates [RR (95% CrI)] of the Various Interventions with “Placebo” as the Common Comparator for PVL (C)

**eFigure 52.** League Plot Depicting the Network Estimates [RR (95% CrI)] of Postnatal Corticosteroids Comparisons for PVL

**eFigure 53.** Direct Evidence from the Pair Wise Comparisons for PVL

**eFigure 54.** Network Plot (A), SUCRA Plot with SUCRA Values (%) (B), and Forest Plot Depicting the Network Estimates [RR (95% CrI)] of the Various Interventions with “Placebo” as the Common Comparator for CP (C)

**eFigure 55.** League Plot Depicting the Network Estimates [RR (95% CrI)] of Postnatal Corticosteroids Comparisons for CP

**eFigure 56.** Direct Evidence from the Pair Wise Comparisons for CP

**eFigure 57.** League Plot Depicting the Network Estimates [RR (95% CrI)] of Postnatal Corticosteroids Comparisons for Sensitivity Analysis - Duration of Course of Dexamethasone

**eFigure 58.** Split Between Direct and Indirect Evidence for Duration of Course of Dexamethasone

**eFigure 59.** Network Plot (A), SUCRA Plot with SUCRA Values (%) (B), and Forest Plot Depicting the Network Estimates [RR (95% CrI)] of the Various Interventions with “Placebo” as the Common Comparator for Sensitivity Analysis Excluding Trials with Antenatal Corticosteroid Coverage <70% (C)

**eFigure 60.** League Plot Depicting the Network Estimates [RR (95% CrI)] of Postnatal Corticosteroids Comparisons for Sensitivity Analysis Excluding Trials with Antenatal Corticosteroid Coverage <70%

**eFigure 61.** Split Between Direct and Indirect Evidence for Sensitivity Analysis Excluding Trials with Antenatal Corticosteroid Coverage <70%

**eFigure 62.** Network Plot (A), SUCRA Plot with SUCRA Values (%) (B), and Forest Plot Depicting the Network Estimates [RR (95% CrI)] of the Various Interventions with “Placebo” as the Common Comparator for Sensitivity Analysis by Excluding Trials with High Risk of Bias (C)

**eFigure 63.** League Plot Depicting the Network Estimates [RR (95% CrI)] of Postnatal Corticosteroids Comparisons for Sensitivity Analysis by Excluding Trials with High Risk of Bias

**eFigure 64.** Split Between Direct and Indirect Evidence for Sensitivity Analysis by Excluding Trials with High Risk of Bias

**eFigure 65.** Network Plot (A), SUCRA Plot with SUCRA Values (%) (B), and Forest Plot Depicting the Network Estimates [RR (95% CrI)] of the Various Interventions with “Placebo” as the Common Comparator for Sensitivity Analysis by Combining Different Types of Inhaled Corticosteroids (C)

**eFigure 66.** League Plot Depicting the Network Estimates [RR (95% CrI)] of Postnatal Corticosteroids Comparisons for Sensitivity Analysis by Combining Different Types of Inhaled Corticosteroids

**eFigure 67.** Split Between Direct and Indirect Evidence for Sensitivity Analysis by Combining Different Types of Inhaled Corticosteroids

**eTable 1.** Literature Search Strategy for Two Electronic Databases

**eTable 2.** Some of the Studies That Were Excluded for Valid Reasons

**eTable 3.** Network Characteristics for All the Outcomes and Sensitivity Analysis

**eTable 4.** GRADE/Quality of Evidence for Some of the Secondary Outcomes

This supplementary material has been provided by the authors to give readers additional information about their work.

**eFigure 1. Literature Search/PRISMA Flow**<sup>1-62</sup>

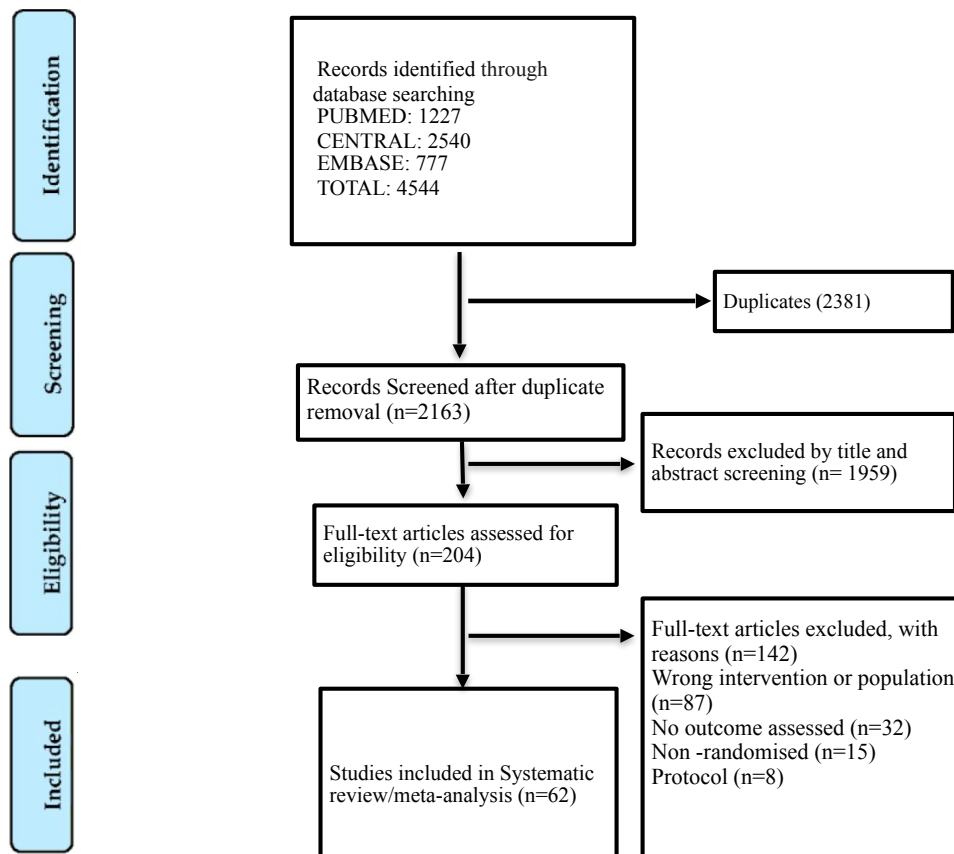

**eFigure 2. Mean Gestational Age of the Enrolled Neonates**

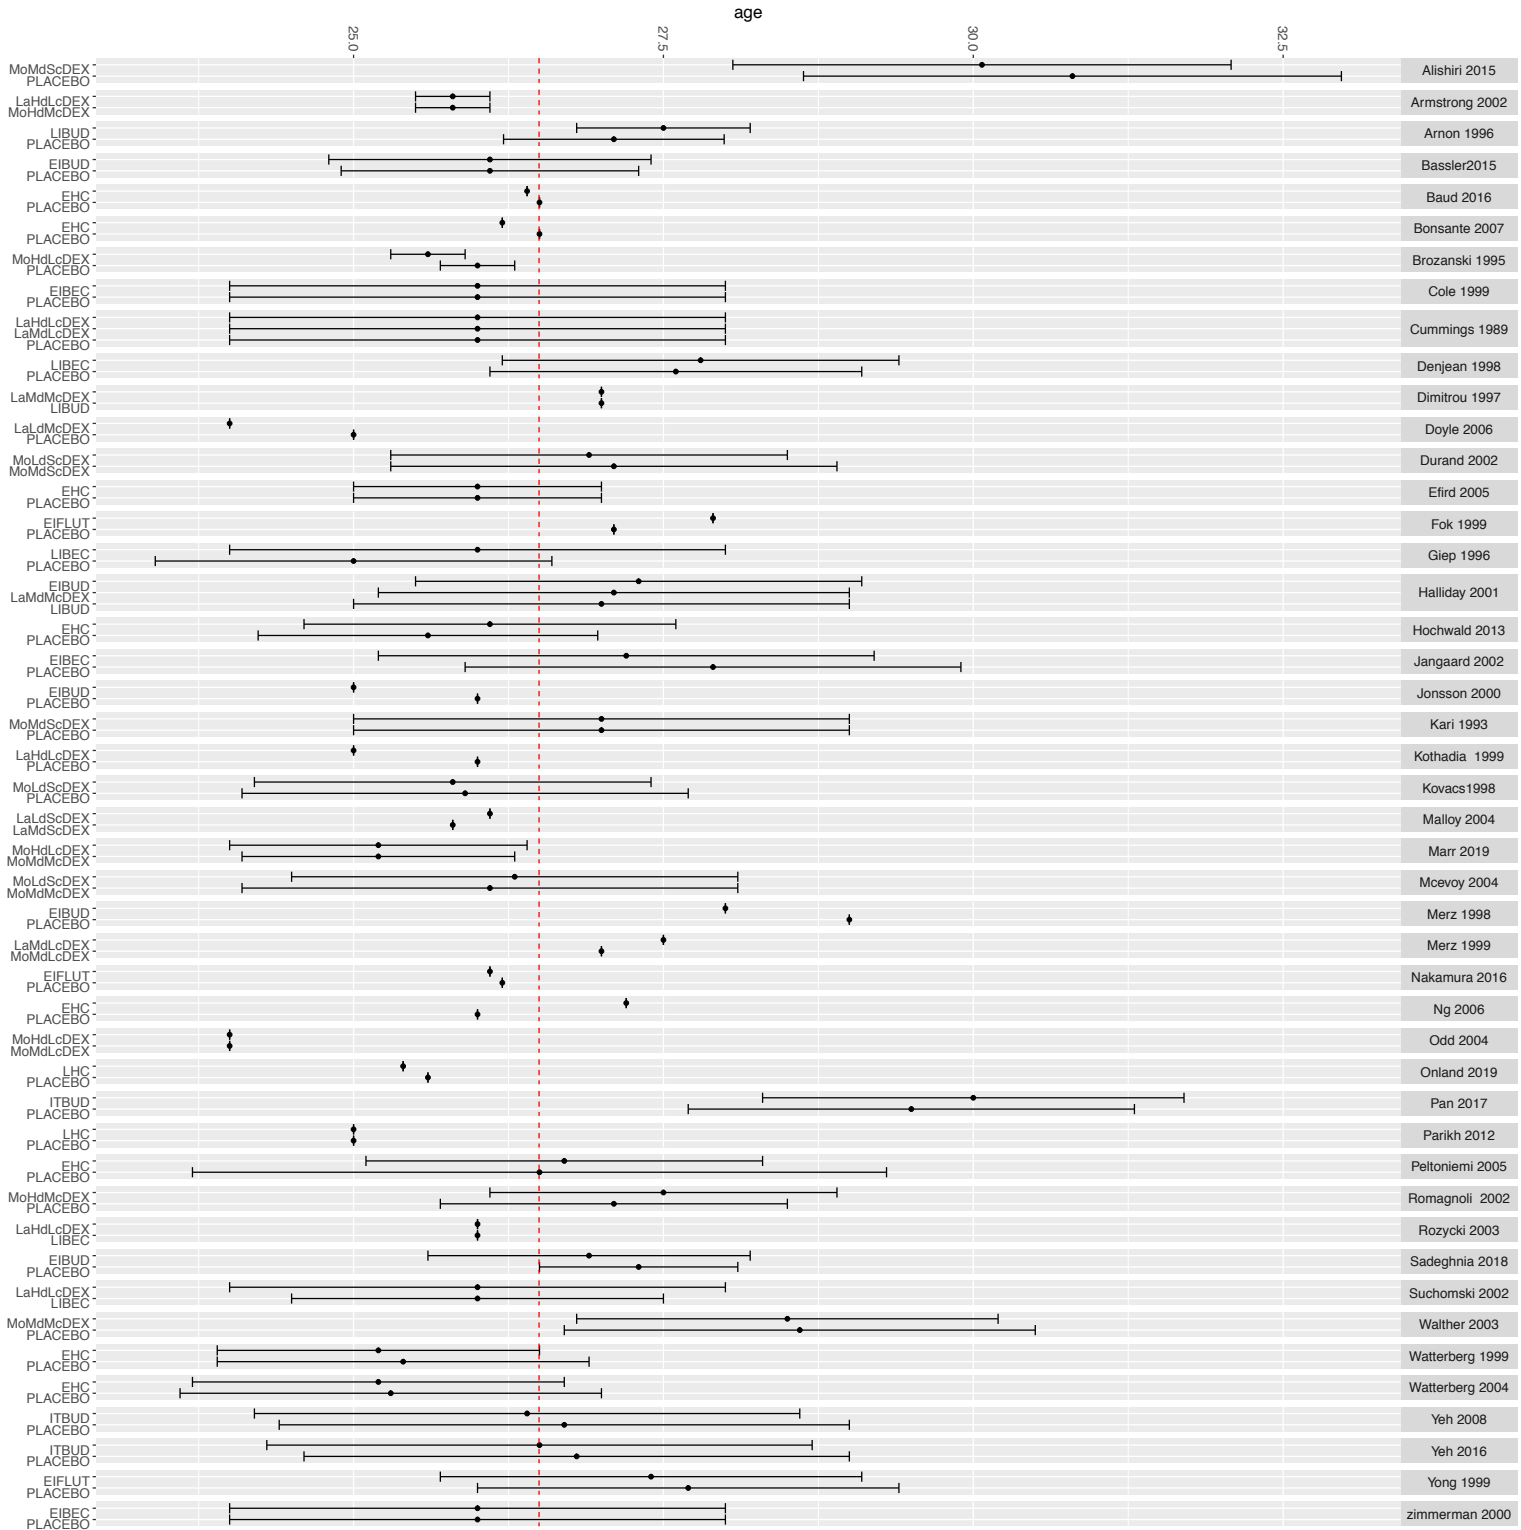

**eFigure 3. Risk of Bias Summary and Graph of the Included Trials**

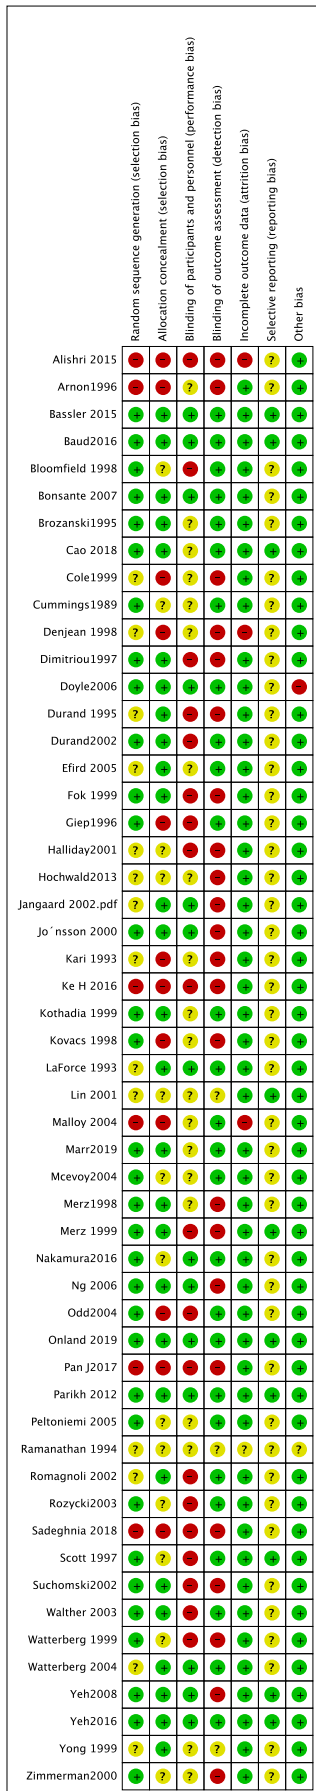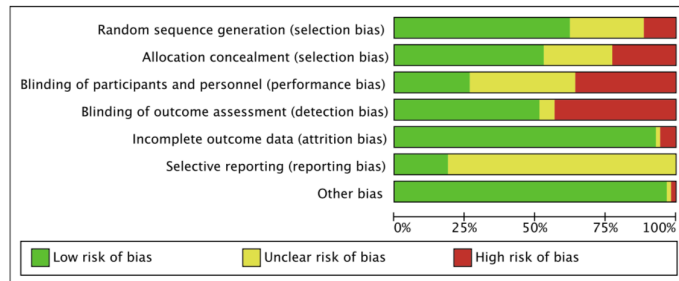



**eFigure 4. Direct Evidence from the Pair Wise Comparisons for the Primary Outcome BPD or Mortality at 36 Weeks' PMA**

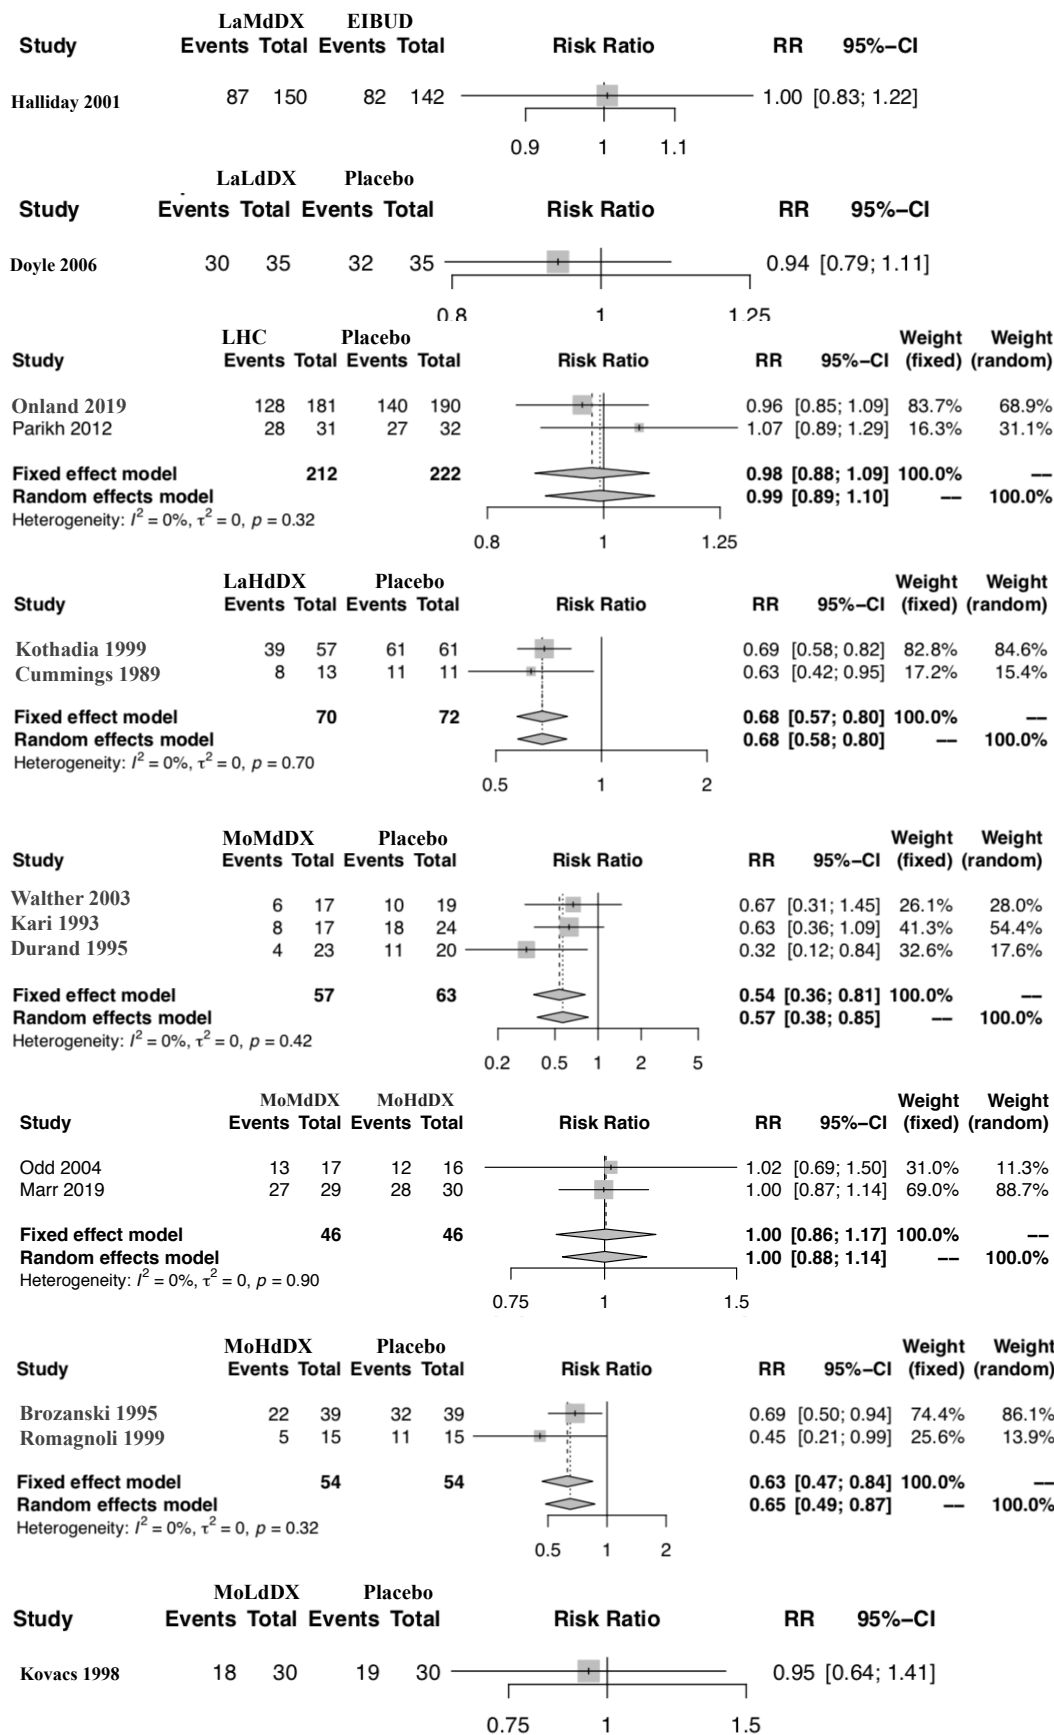

| Study       | LaMdDX |       | LaLdDX |       | Risk Ratio | RR   | 95%-CI       |
|-------------|--------|-------|--------|-------|------------|------|--------------|
|             | Events | Total | Events | Total |            |      |              |
| Malloy 2004 | 8      | 9     | 6      | 8     |            | 1.19 | [0.75; 1.88] |

| Study                       | LIBEC     |       | LaHdDX    |       | Risk Ratio | RR          | 95%-CI              | Weight (fixed) | Weight (random) |
|-----------------------------|-----------|-------|-----------|-------|------------|-------------|---------------------|----------------|-----------------|
|                             | Events    | Total | Events    | Total |            |             |                     |                |                 |
| Rozycki 2003                | 25        | 46    | 7         | 15    |            | 1.16        | [0.64; 2.13]        | 23.9%          | 2.8%            |
| Suchomski 2002              | 46        | 49    | 26        | 27    |            | 0.97        | [0.88; 1.08]        | 76.1%          | 97.2%           |
| <b>Fixed effect model</b>   | <b>95</b> |       | <b>42</b> |       |            | <b>1.02</b> | <b>[0.86; 1.21]</b> | <b>100.0%</b>  | <b>—</b>        |
| <b>Random effects model</b> |           |       |           |       |            | <b>0.98</b> | <b>[0.89; 1.08]</b> | <b>—</b>       | <b>100.0%</b>   |

Heterogeneity:  $I^2 = 0\%$ ,  $\tau^2 = 0$ ,  $p = 0.33$

| Study                       | EIBEC      |       | Placebo    |       | Risk Ratio | RR          | 95%-CI              | Weight (fixed) | Weight (random) |
|-----------------------------|------------|-------|------------|-------|------------|-------------|---------------------|----------------|-----------------|
|                             | Events     | Total | Events     | Total |            |             |                     |                |                 |
| Jangaard 2002               | 6          | 30    | 6          | 30    |            | 1.00        | [0.36; 2.75]        | 11.8%          | 9.2%            |
| Cole 1999                   | 30         | 123   | 31         | 130   |            | 1.02        | [0.66; 1.58]        | 59.3%          | 49.1%           |
| zimmerman 2000              | 13         | 23    | 15         | 24    |            | 0.90        | [0.56; 1.45]        | 28.9%          | 41.8%           |
| <b>Fixed effect model</b>   | <b>176</b> |       | <b>184</b> |       |            | <b>0.99</b> | <b>[0.72; 1.36]</b> | <b>100.0%</b>  | <b>—</b>        |
| <b>Random effects model</b> |            |       |            |       |            | <b>0.97</b> | <b>[0.71; 1.32]</b> | <b>—</b>       | <b>100.0%</b>   |

Heterogeneity:  $I^2 = 0\%$ ,  $\tau^2 = 0$ ,  $p = 0.93$

| Study                       | ITBUD      |       | Placebo    |       | Risk Ratio | RR          | 95%-CI              | Weight (fixed) | Weight (random) |
|-----------------------------|------------|-------|------------|-------|------------|-------------|---------------------|----------------|-----------------|
|                             | Events     | Total | Events     | Total |            |             |                     |                |                 |
| Yeh 2016                    | 55         | 131   | 89         | 134   |            | 0.63        | [0.50; 0.80]        | 56.4%          | 35.8%           |
| Yeh 2008                    | 19         | 60    | 34         | 56    |            | 0.52        | [0.34; 0.80]        | 22.6%          | 28.3%           |
| Lin 2001                    | 34         | 44    | 32         | 42    |            | 1.01        | [0.80; 1.28]        | 21.0%          | 35.9%           |
| <b>Fixed effect model</b>   | <b>235</b> |       | <b>232</b> |       |            | <b>0.69</b> | <b>[0.58; 0.81]</b> | <b>100.0%</b>  | <b>—</b>        |
| <b>Random effects model</b> |            |       |            |       |            | <b>0.71</b> | <b>[0.47; 1.07]</b> | <b>—</b>       | <b>100.0%</b>   |

Heterogeneity:  $I^2 = 84\%$ ,  $\tau^2 = 0.1105$ ,  $p < 0.01$

| Study                       | EIBUD      |       | Placebo    |       | Risk Ratio | RR          | 95%-CI              | Weight (fixed) | Weight (random) |
|-----------------------------|------------|-------|------------|-------|------------|-------------|---------------------|----------------|-----------------|
|                             | Events     | Total | Events     | Total |            |             |                     |                |                 |
| Bassler2015                 | 175        | 437   | 194        | 419   |            | 0.86        | [0.74; 1.01]        | 89.6%          | 58.0%           |
| Jonsson 2000                | 9          | 14    | 11         | 14    |            | 0.82        | [0.51; 1.32]        | 5.0%           | 32.7%           |
| Merz 1998                   | 0          | 12    | 0          | 11    |            | 0.25        | [0.08; 0.82]        | 0.0%           | 0.0%            |
| Cao 2018                    | 3          | 40    | 12         | 40    |            | 0.25        | [0.08; 0.82]        | 5.4%           | 9.3%            |
| <b>Fixed effect model</b>   | <b>503</b> |       | <b>484</b> |       |            | <b>0.83</b> | <b>[0.72; 0.96]</b> | <b>100.0%</b>  | <b>—</b>        |
| <b>Random effects model</b> |            |       |            |       |            | <b>0.76</b> | <b>[0.51; 1.12]</b> | <b>—</b>       | <b>100.0%</b>   |

Heterogeneity:  $I^2 = 53\%$ ,  $\tau^2 = 0.0623$ ,  $p = 0.12$

| Study                       | EHC        |       | Placebo    |       | Risk Ratio | RR          | 95%-CI              | Weight (fixed) | Weight (random) |
|-----------------------------|------------|-------|------------|-------|------------|-------------|---------------------|----------------|-----------------|
|                             | Events     | Total | Events     | Total |            |             |                     |                |                 |
| Baud 2016                   | 102        | 255   | 130        | 266   |            | 0.82        | [0.67; 0.99]        | 39.7%          | 26.1%           |
| Bonsante 2007               | 10         | 25    | 18         | 25    |            | 0.56        | [0.32; 0.95]        | 5.6%           | 8.7%            |
| Peltoniemi 2005             | 9          | 25    | 14         | 26    |            | 0.67        | [0.36; 1.26]        | 4.3%           | 6.7%            |
| Watterberg 1999             | 8          | 20    | 13         | 20    |            | 0.62        | [0.33; 1.15]        | 4.1%           | 6.9%            |
| Watterberg 2004             | 116        | 179   | 118        | 178   |            | 0.98        | [0.84; 1.14]        | 36.9%          | 29.6%           |
| Hochwald 2013               | 4          | 11    | 9          | 11    |            | 0.44        | [0.19; 1.02]        | 2.8%           | 4.2%            |
| Efird 2005                  | 11         | 16    | 11         | 18    |            | 1.12        | [0.69; 1.85]        | 3.2%           | 9.9%            |
| Ng 2006                     | 13         | 24    | 11         | 24    |            | 1.18        | [0.67; 2.09]        | 3.4%           | 8.0%            |
| <b>Fixed effect model</b>   | <b>555</b> |       | <b>568</b> |       |            | <b>0.86</b> | <b>[0.77; 0.96]</b> | <b>100.0%</b>  | <b>—</b>        |
| <b>Random effects model</b> |            |       |            |       |            | <b>0.84</b> | <b>[0.70; 1.00]</b> | <b>—</b>       | <b>100.0%</b>   |

Heterogeneity:  $I^2 = 42\%$ ,  $\tau^2 = 0.0230$ ,  $p = 0.10$

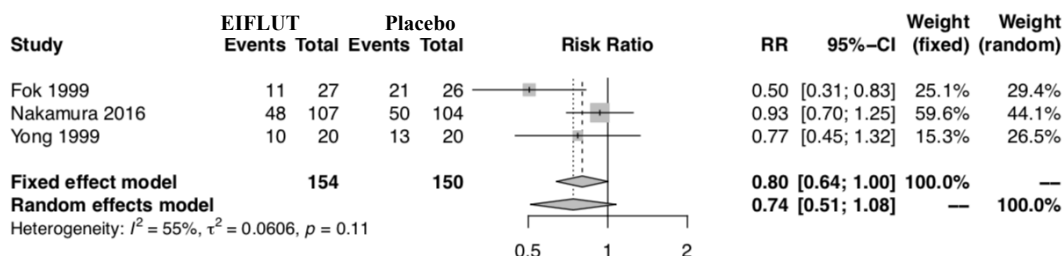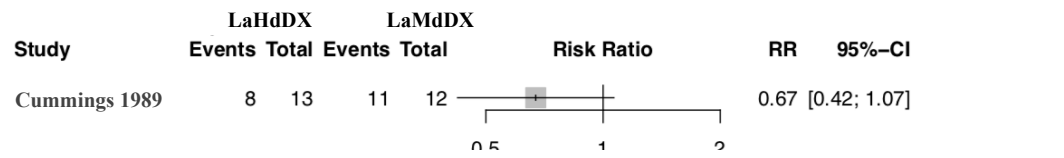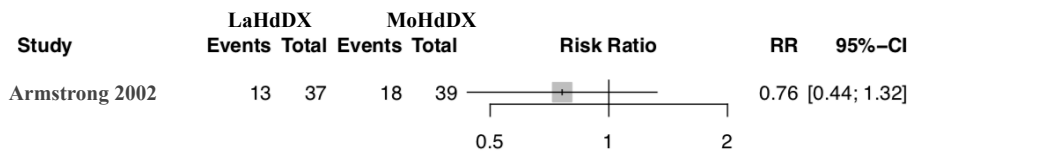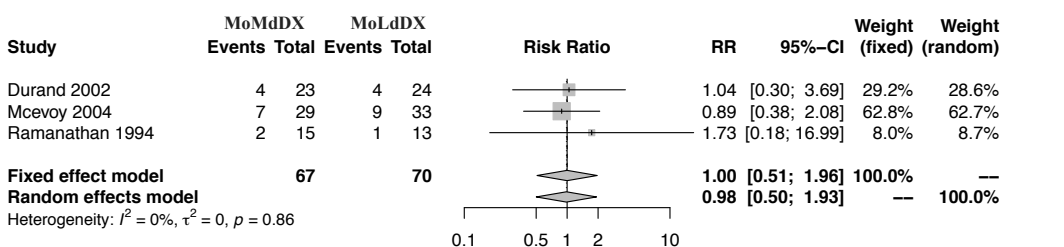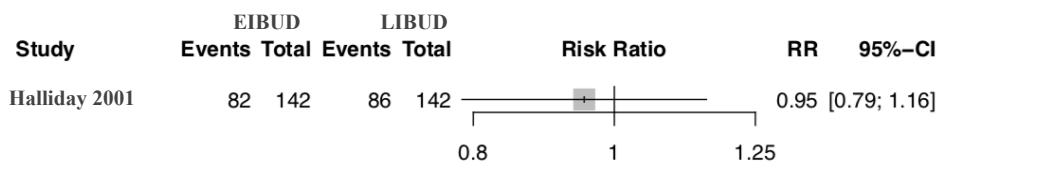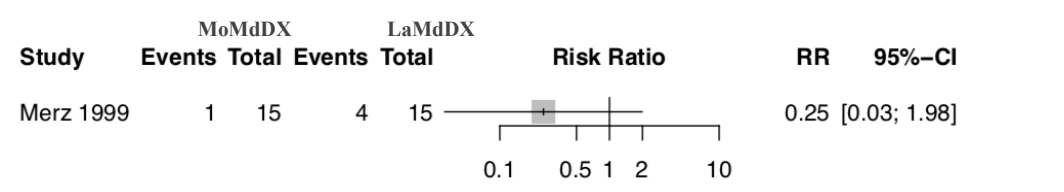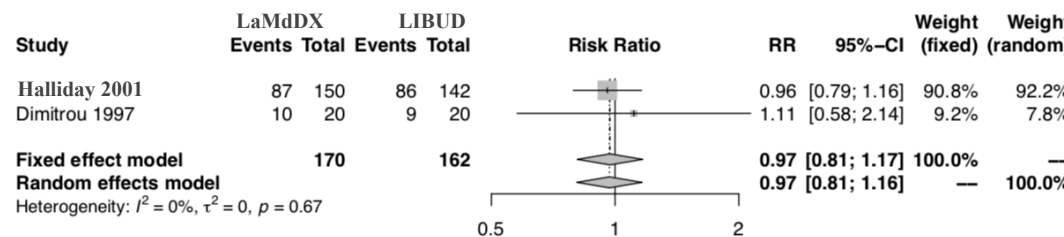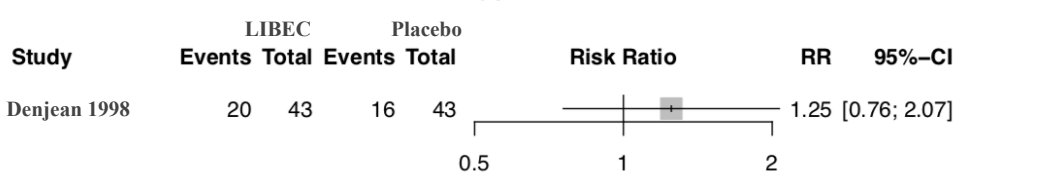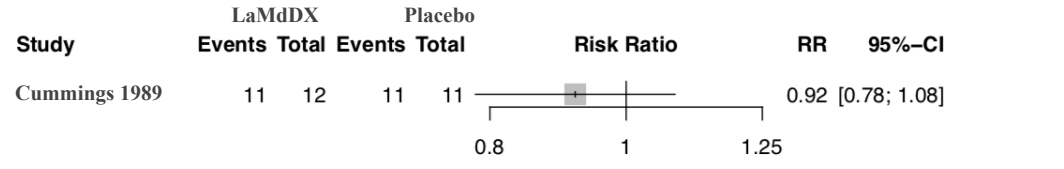

**eFigure 5. Split Between Direct and Indirect Evidence for the Primary Outcome BPD or Mortality at 36 Weeks' PMA**

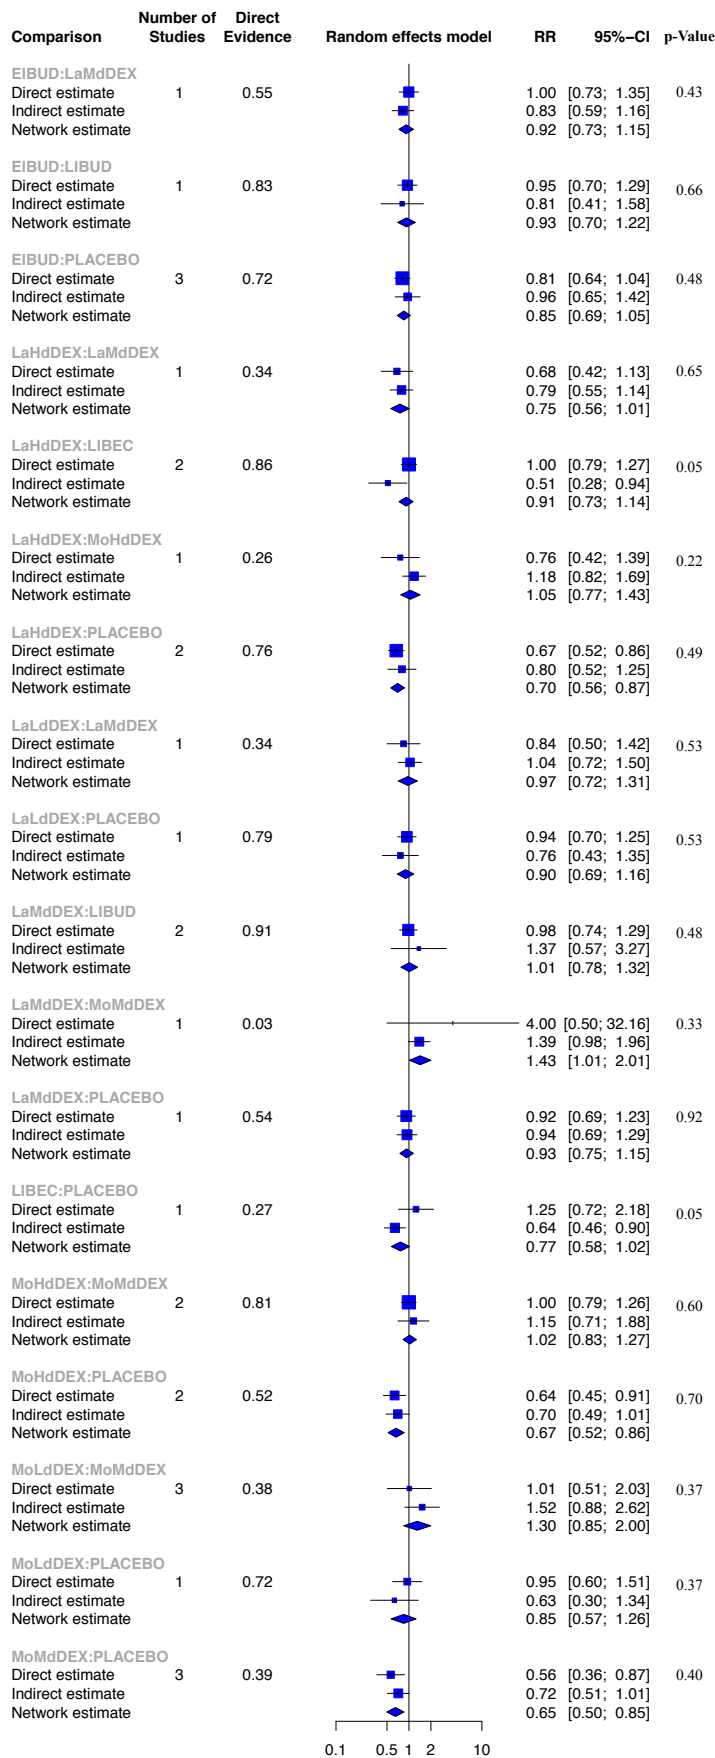

**eFigure 6. Network Plot for BPD at 36 Weeks' PMA (A), SUCRA Plot with SUCRA Values (%) for BPD at 36 Weeks' PMA (B), and Forest Plot Depicting the Network Estimates [RR (95% CrI)] of the Various Interventions with “Placebo” as the Common Comparator for BPD at 36 Weeks' PMA (C)**

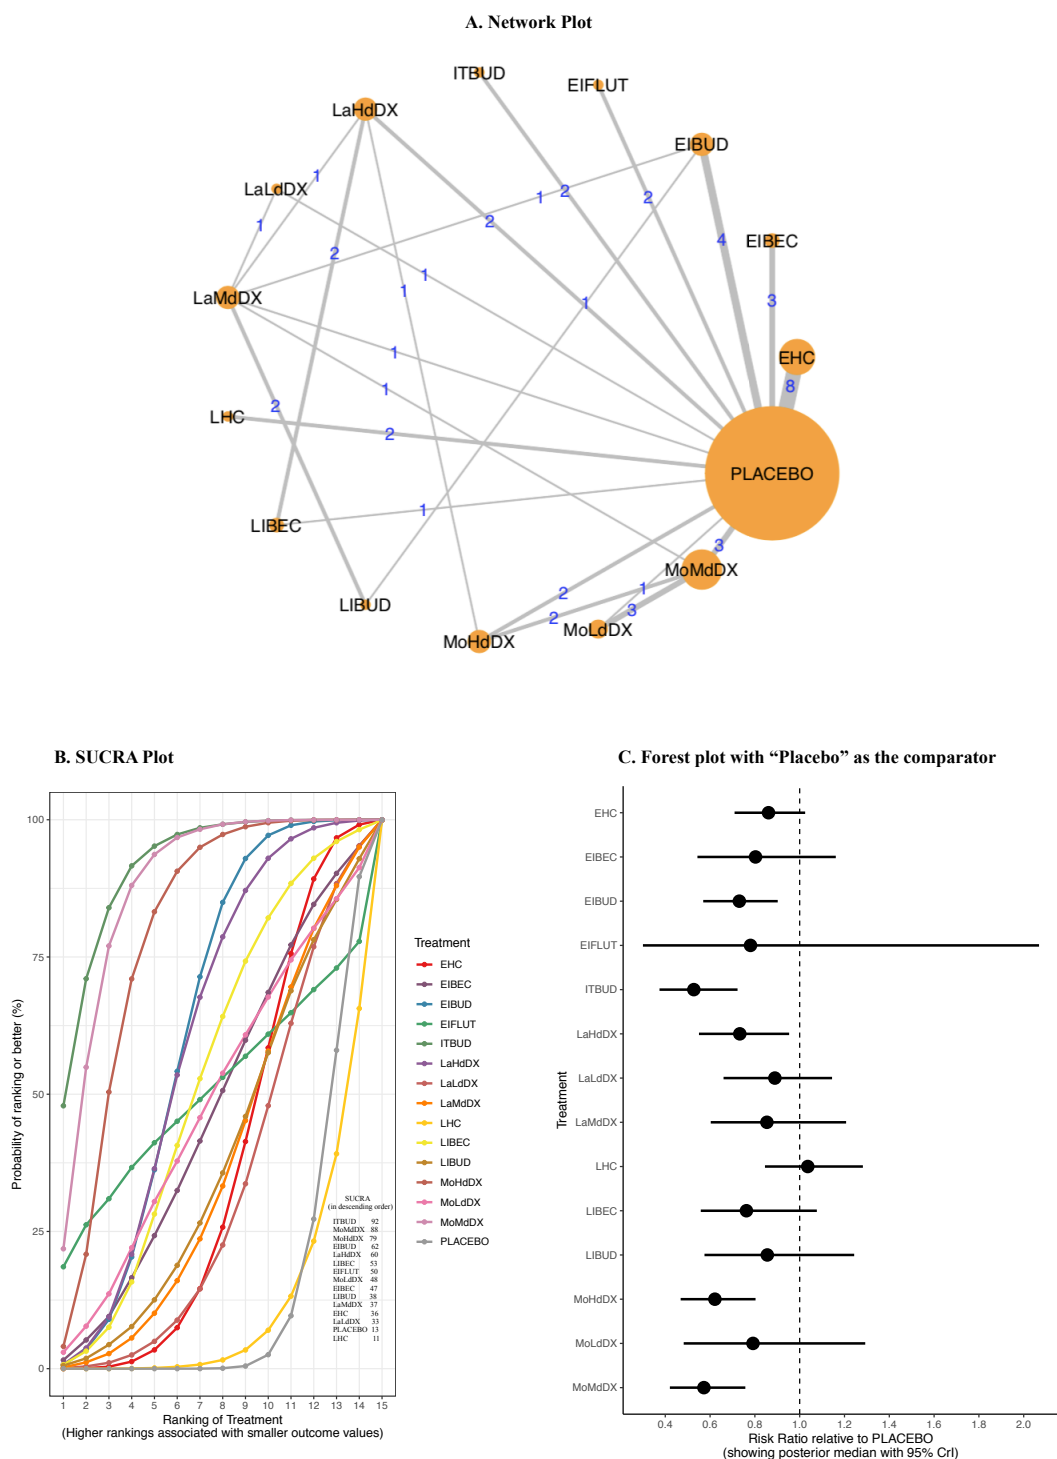

**eFigure 7. League Plot Depicting the Network Estimates [RR (95% CrI)] of Postnatal Corticosteroids Comparisons for BPD at 36 Weeks' PMA**

|         | Treatment                |                          |                          |                          |                          |                      |                      |                      |                      |                      |                          |                          |                          |                          |                          |
|---------|--------------------------|--------------------------|--------------------------|--------------------------|--------------------------|----------------------|----------------------|----------------------|----------------------|----------------------|--------------------------|--------------------------|--------------------------|--------------------------|--------------------------|
|         | ITBUD                    | MoMdDX                   | MoHdDX                   | EIBUD                    | LaHdDX                   | LIBEC                | EIFLUT               | MoLdDX               | EIBEC                | LIBUD                | LaMdDX                   | EHC                      | LaLdDX                   | PLACEBO                  | LHC                      |
| ITBUD   |                          | 1.11<br>(0.70, 1.68)     | 1.20<br>(0.77, 1.80)     | 1.41<br>(0.93, 2.06)     | 1.42<br>(0.91, 2.14)     | 1.50<br>(0.93, 2.37) | 1.68<br>(0.54, 4.22) | 1.57<br>(0.85, 2.72) | 1.57<br>(0.93, 2.51) | 1.67<br>(0.97, 2.69) | **1.67**<br>(1.01, 2.64) | **1.66**<br>(1.13, 2.37) | **1.72**<br>(1.10, 2.57) | **1.93**<br>(1.38, 2.67) | **2.01**<br>(1.35, 2.95) |
| MoMdDX  | 0.94<br>(0.60, 1.43)     |                          | 1.09<br>(0.88, 1.37)     | 1.30<br>(0.89, 1.84)     | 1.30<br>(0.88, 1.88)     | 1.37<br>(0.89, 2.11) | 1.54<br>(0.49, 3.71) | 1.43<br>(0.83, 2.29) | 1.45<br>(0.87, 2.29) | 1.54<br>(0.93, 2.41) | 1.54<br>(0.96, 2.37)     | **1.53**<br>(1.08, 2.13) | **1.58**<br>(1.05, 2.30) | **1.77**<br>(1.32, 2.38) | **1.85**<br>(1.29, 2.65) |
| MoHdDX  | 0.87<br>(0.56, 1.29)     | 0.93<br>(0.73, 1.13)     |                          | 1.19<br>(0.83, 1.66)     | 1.20<br>(0.84, 1.68)     | 1.26<br>(0.85, 1.88) | 1.41<br>(0.47, 3.33) | 1.32<br>(0.76, 2.15) | 1.33<br>(0.81, 2.07) | 1.41<br>(0.86, 2.18) | 1.41<br>(0.90, 2.14)     | **1.41**<br>(1.01, 1.92) | 1.45<br>(0.97, 2.08)     | **1.63**<br>(1.25, 2.13) | **1.70**<br>(1.21, 2.39) |
| EIBUD   | 0.74<br>(0.48, 1.07)     | 0.80<br>(0.54, 1.12)     | 0.86<br>(0.60, 1.21)     |                          | 1.02<br>(0.71, 1.44)     | 1.08<br>(0.72, 1.62) | 1.20<br>(0.40, 2.84) | 1.13<br>(0.65, 1.89) | 1.13<br>(0.71, 1.72) | 1.19<br>(0.83, 1.65) | 1.19<br>(0.87, 1.62)     | 1.20<br>(0.89, 1.59)     | 1.23<br>(0.87, 1.69)     | **1.39**<br>(1.11, 1.76) | **1.45**<br>(1.07, 1.98) |
| LaHdDX  | 0.74<br>(0.47, 1.09)     | 0.80<br>(0.53, 1.13)     | 0.86<br>(0.60, 1.20)     | 1.01<br>(0.70, 1.41)     |                          | 1.05<br>(0.86, 1.36) | 1.20<br>(0.39, 2.91) | 1.13<br>(0.62, 1.90) | 1.13<br>(0.69, 1.75) | 1.20<br>(0.73, 1.85) | 1.20<br>(0.75, 1.81)     | 1.19<br>(0.85, 1.64)     | 1.23<br>(0.82, 1.76)     | **1.38**<br>(1.05, 1.82) | **1.44**<br>(1.02, 2.01) |
| LIBEC   | 0.71<br>(0.42, 1.08)     | 0.76<br>(0.47, 1.12)     | 0.83<br>(0.53, 1.18)     | 0.97<br>(0.62, 1.38)     | 0.96<br>(0.73, 1.16)     |                      | 1.15<br>(0.37, 2.77) | 1.08<br>(0.57, 1.85) | 1.08<br>(0.62, 1.70) | 1.15<br>(0.66, 1.80) | 1.15<br>(0.68, 1.75)     | 1.14<br>(0.75, 1.61)     | 1.18<br>(0.73, 1.71)     | 1.33<br>(0.93, 1.79)     | 1.38<br>(0.91, 1.96)     |
| EIFLUT  | 0.78<br>(0.24, 1.84)     | 0.84<br>(0.27, 2.03)     | 0.91<br>(0.30, 2.15)     | 1.06<br>(0.35, 2.48)     | 1.07<br>(0.34, 2.54)     | 1.13<br>(0.36, 2.72) |                      | 1.19<br>(0.34, 2.89) | 1.19<br>(0.36, 2.83) | 1.26<br>(0.40, 3.06) | 1.26<br>(0.41, 3.00)     | 1.26<br>(0.41, 2.91)     | 1.30<br>(0.42, 3.07)     | 1.45<br>(0.48, 3.33)     | 1.52<br>(0.50, 3.54)     |
| MoLdDX  | 0.69<br>(0.37, 1.18)     | 0.75<br>(0.44, 1.21)     | 0.81<br>(0.47, 1.32)     | 0.95<br>(0.53, 1.54)     | 0.96<br>(0.53, 1.61)     | 1.01<br>(0.54, 1.75) | 1.13<br>(0.35, 2.92) |                      | 1.06<br>(0.54, 1.85) | 1.13<br>(0.58, 1.97) | 1.13<br>(0.59, 1.95)     | 1.12<br>(0.65, 1.84)     | 1.16<br>(0.64, 1.94)     | 1.30<br>(0.77, 2.07)     | 1.36<br>(0.77, 2.22)     |
| EIBEC   | 0.68<br>(0.40, 1.08)     | 0.74<br>(0.44, 1.15)     | 0.80<br>(0.48, 1.24)     | 0.93<br>(0.58, 1.42)     | 0.94<br>(0.57, 1.45)     | 0.99<br>(0.59, 1.60) | 1.11<br>(0.35, 2.80) | 1.04<br>(0.54, 1.84) |                      | 1.10<br>(0.63, 1.82) | 1.10<br>(0.64, 1.78)     | 1.10<br>(0.70, 1.65)     | 1.14<br>(0.69, 1.76)     | 1.27<br>(0.86, 1.84)     | 1.33<br>(0.85, 2.02)     |
| LIBUD   | 0.64<br>(0.37, 1.03)     | 0.69<br>(0.41, 1.08)     | 0.75<br>(0.46, 1.16)     | 0.87<br>(0.61, 1.20)     | 0.88<br>(0.54, 1.37)     | 0.93<br>(0.56, 1.52) | 1.04<br>(0.33, 2.48) | 0.98<br>(0.51, 1.72) | 0.98<br>(0.55, 1.60) |                      | 1.01<br>(0.75, 1.37)     | 1.03<br>(0.66, 1.54)     | 1.06<br>(0.67, 1.61)     | 1.20<br>(0.80, 1.74)     | 1.25<br>(0.79, 1.89)     |
| LaMdDX  | **0.63**<br>(0.38, 0.99) | 0.69<br>(0.42, 1.04)     | 0.74<br>(0.47, 1.12)     | 0.86<br>(0.62, 1.15)     | 0.88<br>(0.55, 1.33)     | 0.92<br>(0.57, 1.46) | 1.03<br>(0.33, 2.46) | 0.97<br>(0.51, 1.69) | 0.97<br>(0.56, 1.56) | 1.01<br>(0.73, 1.34) |                          | 1.03<br>(0.67, 1.48)     | 1.05<br>(0.70, 1.54)     | 1.19<br>(0.83, 1.66)     | 1.24<br>(0.81, 1.83)     |
| EHC     | **0.62**<br>(0.42, 0.89) | **0.67**<br>(0.47, 0.93) | **0.73**<br>(0.52, 0.99) | 0.85<br>(0.63, 1.13)     | 0.86<br>(0.61, 1.18)     | 0.91<br>(0.62, 1.33) | 1.01<br>(0.34, 2.44) | 0.95<br>(0.54, 1.55) | 0.95<br>(0.60, 1.42) | 1.01<br>(0.65, 1.53) | 1.01<br>(0.68, 1.49)     |                          | 1.04<br>(0.74, 1.42)     | 1.17<br>(0.98, 1.41)     | 1.22<br>(0.93, 1.61)     |
| LaLdDX  | **0.61**<br>(0.39, 0.91) | **0.66**<br>(0.43, 0.95) | 0.71<br>(0.48, 1.03)     | 0.83<br>(0.59, 1.15)     | 0.84<br>(0.57, 1.23)     | 0.89<br>(0.58, 1.37) | 0.99<br>(0.33, 2.38) | 0.93<br>(0.52, 1.57) | 0.93<br>(0.57, 1.44) | 0.99<br>(0.62, 1.48) | 0.99<br>(0.65, 1.43)     | 0.99<br>(0.70, 1.35)     |                          | 1.14<br>(0.87, 1.51)     | 1.19<br>(0.85, 1.69)     |
| PLACEBO | **0.53**<br>(0.37, 0.72) | **0.58**<br>(0.42, 0.76) | **0.62**<br>(0.47, 0.80) | **0.73**<br>(0.57, 0.90) | **0.74**<br>(0.55, 0.95) | 0.78<br>(0.56, 1.08) | 0.87<br>(0.30, 2.07) | 0.82<br>(0.48, 1.29) | 0.82<br>(0.54, 1.16) | 0.87<br>(0.58, 1.24) | 0.87<br>(0.60, 1.21)     | 0.86<br>(0.71, 1.02)     | 0.89<br>(0.66, 1.14)     |                          | 1.04<br>(0.85, 1.28)     |
| LHC     | **0.52**<br>(0.34, 0.74) | **0.56**<br>(0.38, 0.78) | **0.61**<br>(0.42, 0.83) | **0.71**<br>(0.51, 0.94) | **0.71**<br>(0.50, 0.98) | 0.75<br>(0.51, 1.10) | 0.84<br>(0.28, 2.02) | 0.79<br>(0.45, 1.29) | 0.79<br>(0.50, 1.18) | 0.84<br>(0.53, 1.26) | 0.84<br>(0.55, 1.23)     | 0.84<br>(0.62, 1.08)     | 0.86<br>(0.59, 1.18)     | 0.97<br>(0.78, 1.18)     |                          |

**eFigure 8. Direct Evidence from the Pair Wise Comparisons for BPD at 36 Weeks' PMA**

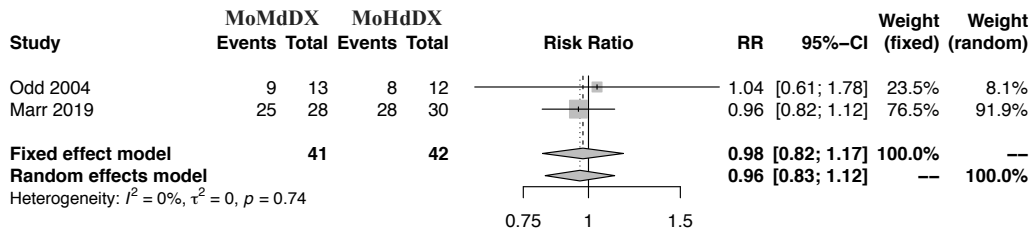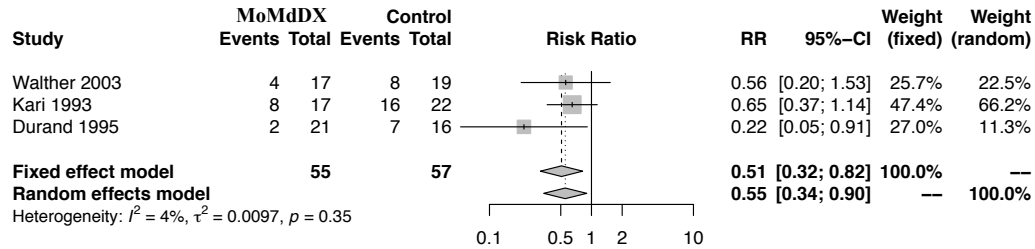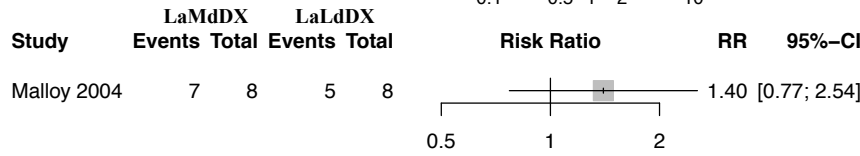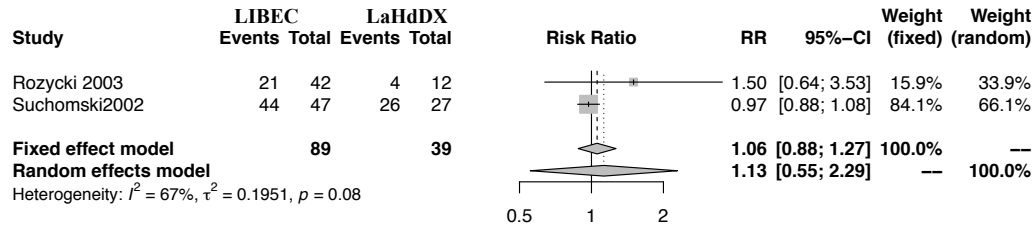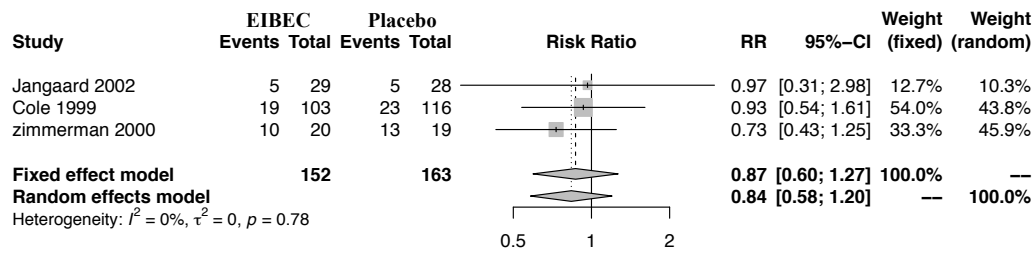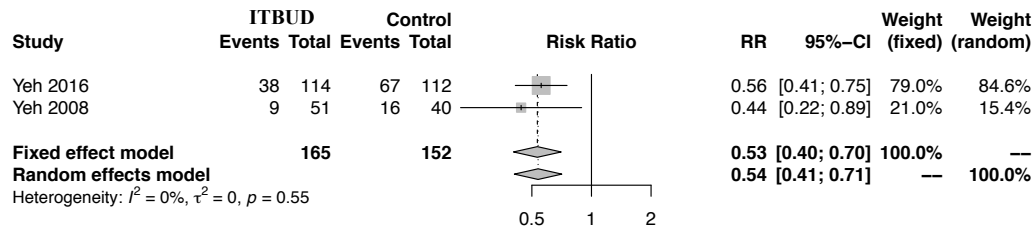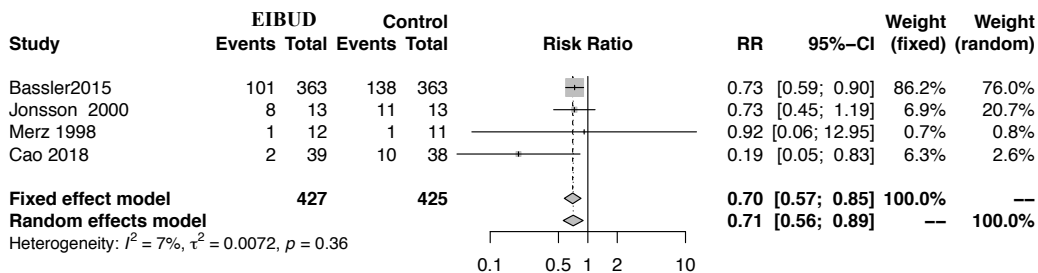

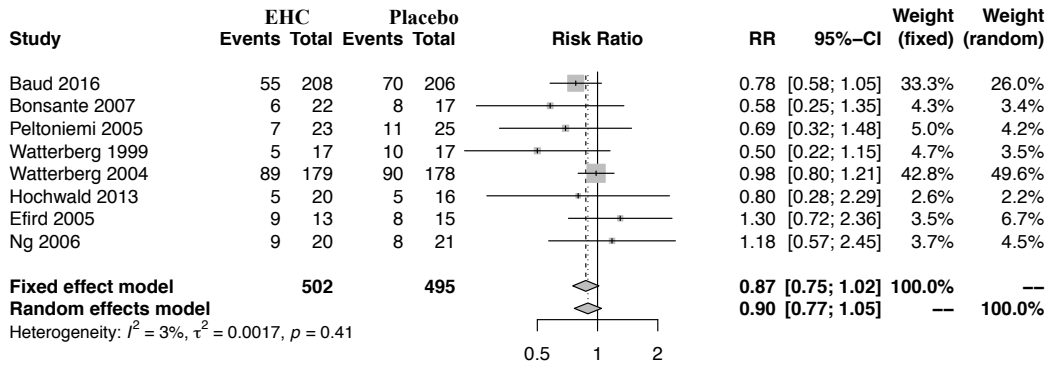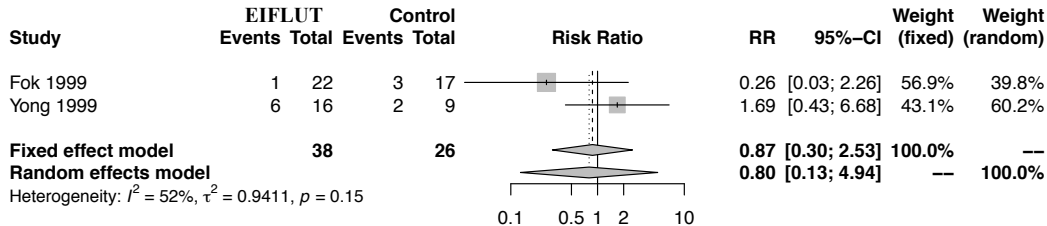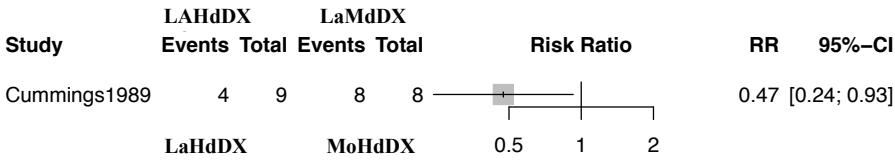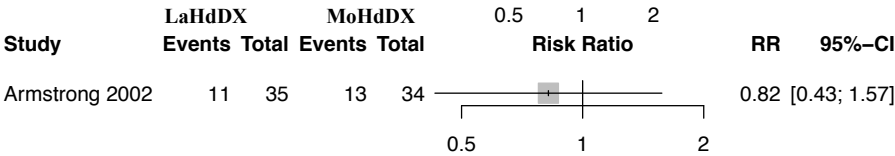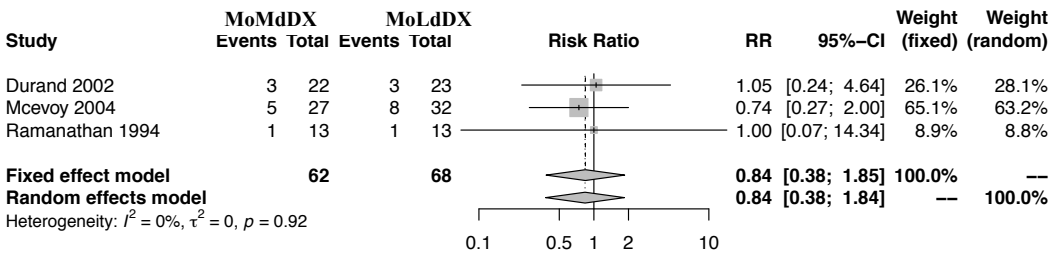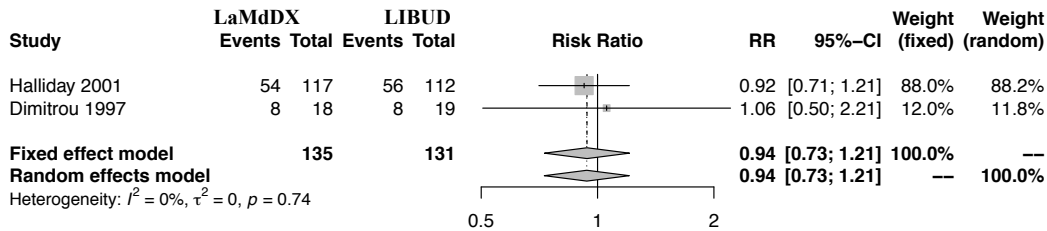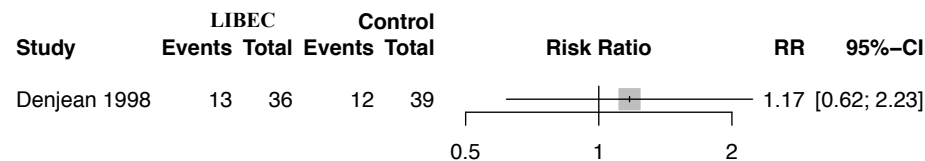



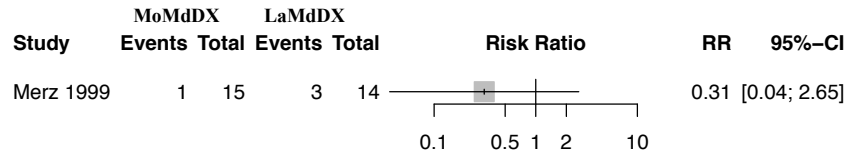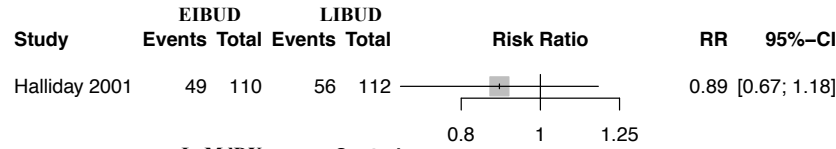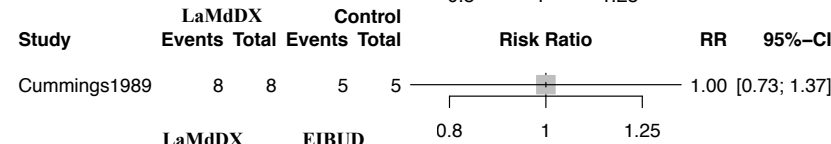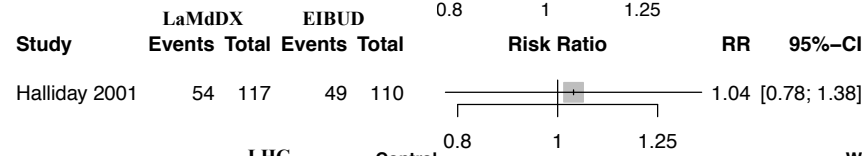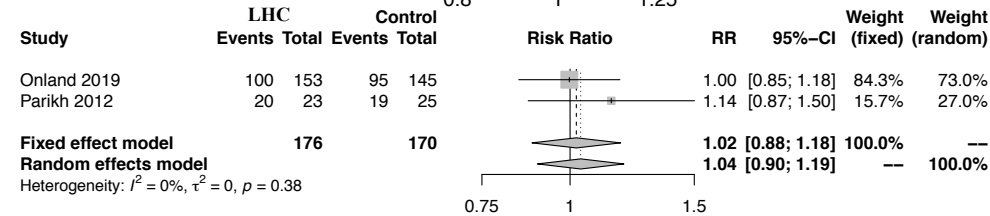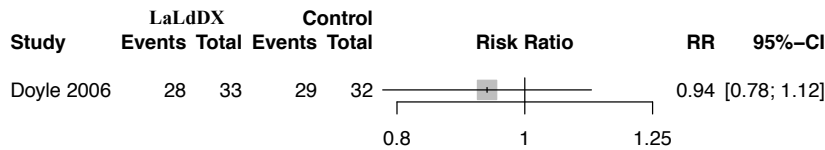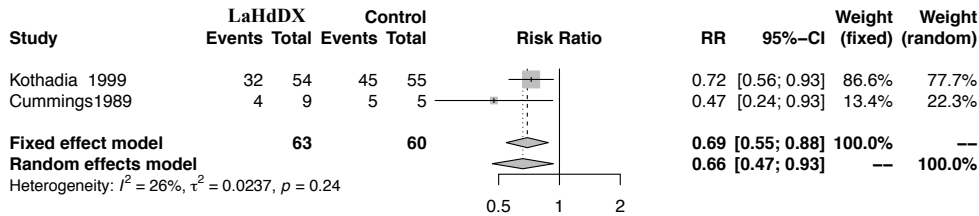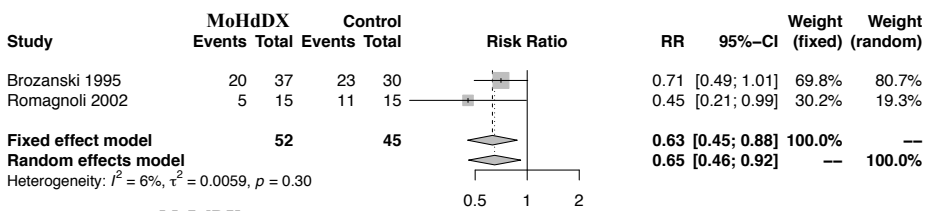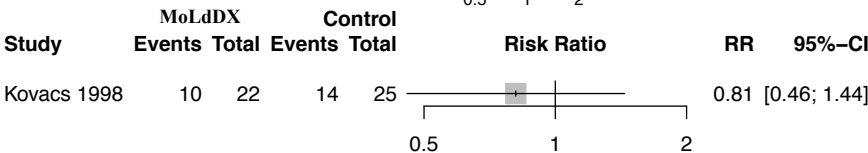

**eFigure 9. Split Between Direct and Indirect Evidence for BPD at 36 Weeks' PMA**

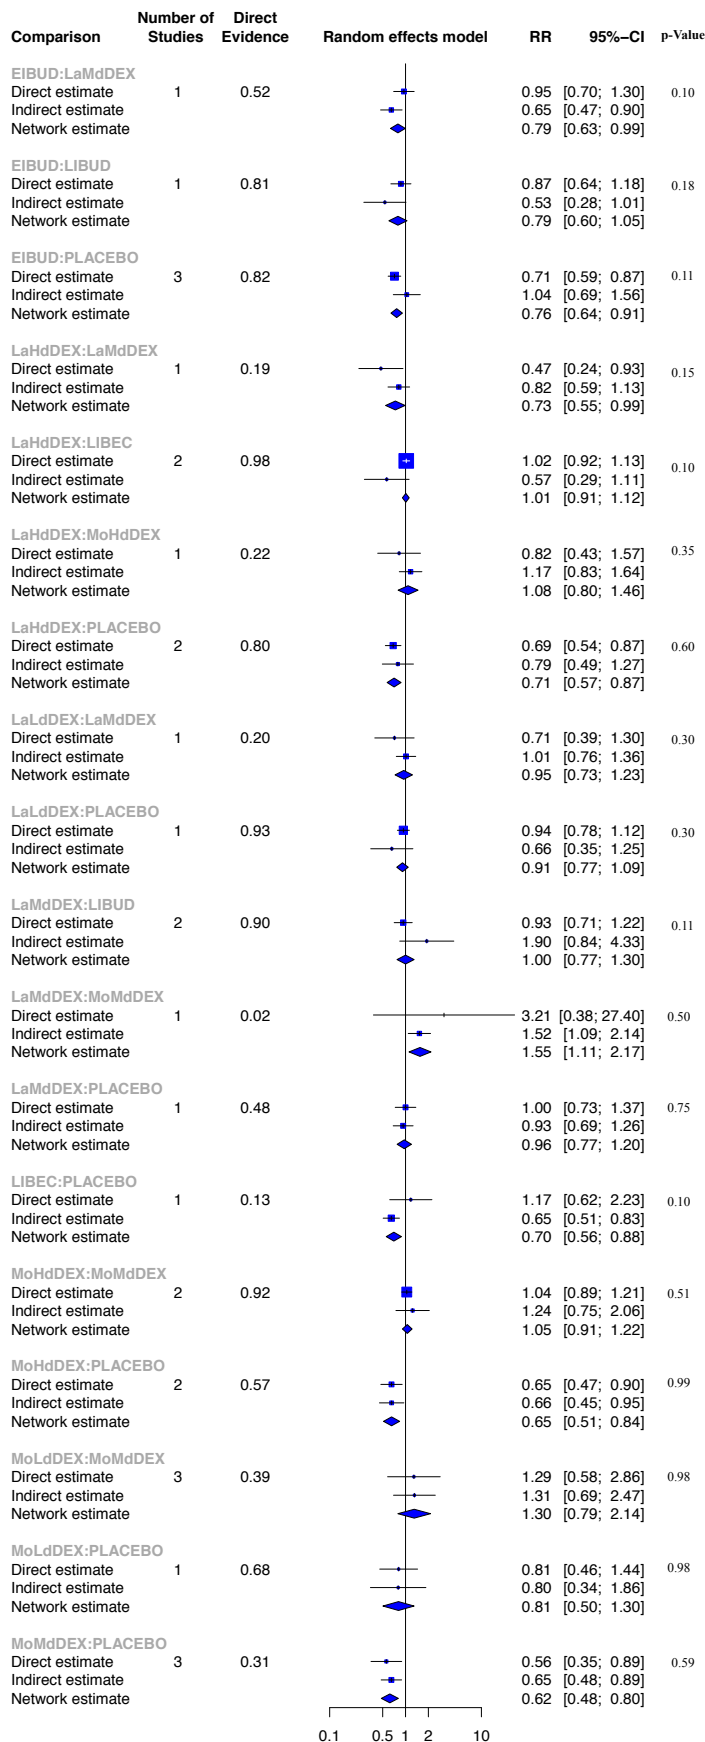

**eFigure 10. Network Plot for BPD at 28 Days (A), SUCRA Plot with SUCRA Values (%) for BPD at 28 Days (B), and Forest Plot Depicting the Network Estimates [RR (95% CrI)] of the Various Interventions with “Placebo” as the Common Comparator for BPD at 28 Days (C)**

**A. Network Plot**

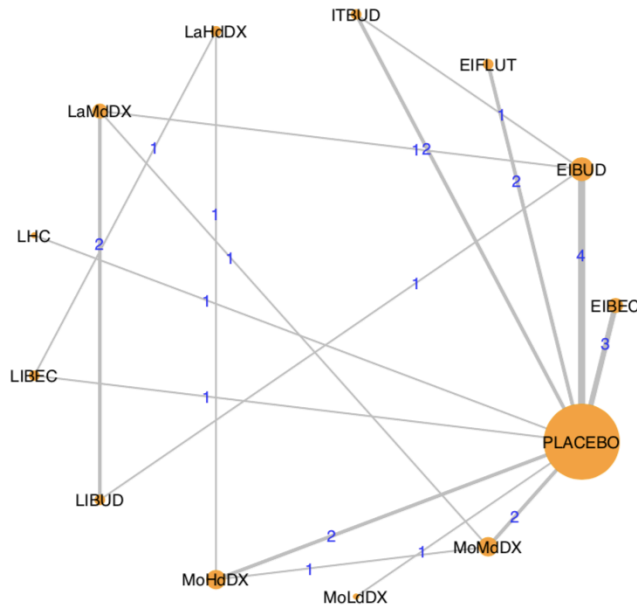

**B. SUCRA plot**

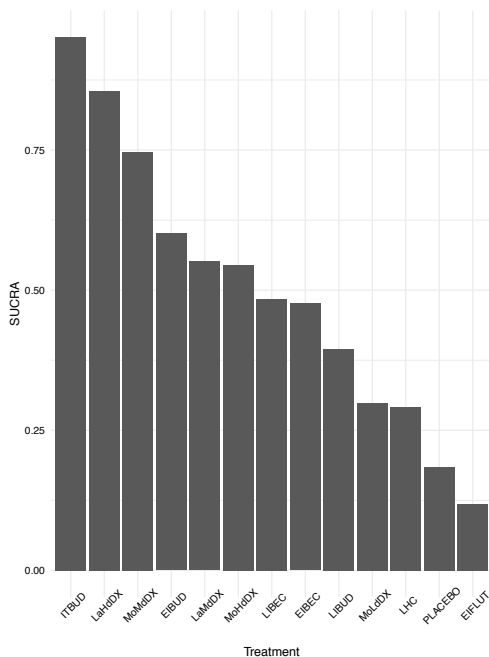

**C. Forest plot with “Placebo” as the comparator**

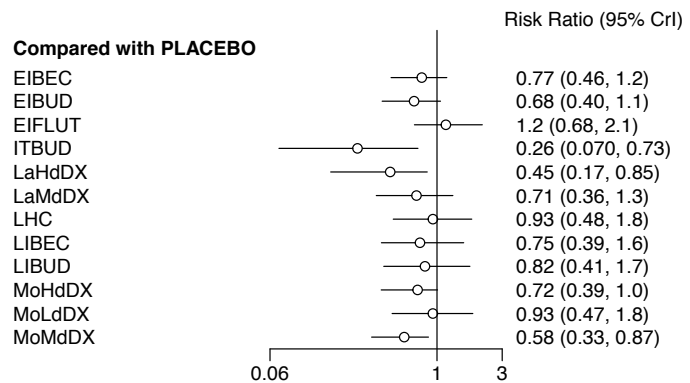

**eFigure 11. League Plot Depicting the Network Estimates [RR (95% CrI)] of Postnatal Corticosteroids Comparisons for BPD at 28 Days**

|                       |                      |                                    |                                    |                                    |                      |                                     |                      |                       |                       |                                     |                                    |                                     |
|-----------------------|----------------------|------------------------------------|------------------------------------|------------------------------------|----------------------|-------------------------------------|----------------------|-----------------------|-----------------------|-------------------------------------|------------------------------------|-------------------------------------|
| <b>EIBEC</b>          | 0.88<br>(0.45, 1.7)  | 1.51<br>(0.77, 3.42)               | 0.34<br>(0.09, 1.05)               | 0.59 (0.2, 1.28)                   | 0.92<br>(0.42, 2.05) | 1.21<br>(0.56, 2.8)                 | 0.98<br>(0.46, 2.44) | 1.06<br>(0.48, 2.75)  | 0.93<br>(0.44, 1.64)  | 1.2 (0.55, 2.86)                    | 0.75<br>(0.37, 1.39)               | 1.29<br>(0.85, 2.17)                |
| 1.13<br>(0.59, 2.24)  | <b>EIBUD</b>         | 1.71<br>(0.87, 3.93)               | 0.39 (0.1, 1.15)                   | 0.67<br>(0.23, 1.48)               | 1.04<br>(0.61, 1.82) | 1.37<br>(0.63, 3.23)                | 1.11<br>(0.52, 2.8)  | 1.19<br>(0.71, 2.44)  | 1.05<br>(0.52, 1.89)  | 1.37<br>(0.62, 3.32)                | 0.85<br>(0.44, 1.53)               | 1.47<br>(0.94, 2.52)                |
| 0.66<br>(0.29, 1.3)   | 0.58<br>(0.25, 1.15) | <b>EIFLUT</b>                      | <b>0.22</b><br><b>(0.05, 0.72)</b> | <b>0.39</b><br><b>(0.12, 0.86)</b> | 0.61<br>(0.24, 1.35) | 0.8 (0.32, 1.82)                    | 0.64<br>(0.27, 1.61) | 0.7 (0.28, 1.76)      | 0.62<br>(0.25, 1.12)  | 0.8 (0.32, 1.87)                    | <b>0.49</b><br><b>(0.21, 0.94)</b> | 0.86<br>(0.47, 1.46)                |
| 2.93<br>(0.95, 11.76) | 2.58<br>(0.87, 9.86) | <b>4.5 (1.39, 19.55)</b>           | <b>ITBUD</b>                       | 1.7 (0.43, 7.33)                   | 2.71<br>(0.84, 11.2) | <b>3.57</b><br><b>(1.09, 15.14)</b> | 2.9 (0.88, 13.02)    | 3.14<br>(0.97, 13.75) | 2.69<br>(0.85, 10.47) | <b>3.56</b><br><b>(1.07, 15.51)</b> | 2.18 (0.7, 8.65)                   | <b>3.82</b><br><b>(1.38, 14.33)</b> |
| 1.69<br>(0.78, 4.96)  | 1.5 (0.68, 4.27)     | <b>2.57</b><br><b>(1.16, 8.65)</b> | 0.59<br>(0.14, 2.32)               | <b>LaHdDX</b>                      | 1.56<br>(0.66, 4.87) | 2.03<br>(0.87, 6.94)                | 1.62<br>(0.86, 5.55) | 1.79<br>(0.75, 6.5)   | 1.58<br>(0.84, 3.37)  | 2.04<br>(0.85, 7.23)                | 1.27 (0.6, 3.29)                   | <b>2.2 (1.18, 6)</b>                |
| 1.09<br>(0.49, 2.37)  | 0.96<br>(0.55, 1.64) | 1.65<br>(0.74, 4.19)               | 0.37<br>(0.09, 1.2)                | 0.64<br>(0.21, 1.52)               | <b>LaMdDX</b>        | 1.31<br>(0.54, 3.4)                 | 1.06<br>(0.45, 2.98) | 1.14<br>(0.74, 2.18)  | 1.01<br>(0.44, 1.97)  | 1.31<br>(0.53, 3.46)                | 0.82 (0.4, 1.54)                   | 1.41<br>(0.77, 2.78)                |
| 0.83<br>(0.36, 1.78)  | 0.73<br>(0.31, 1.58) | 1.24<br>(0.55, 3.12)               | <b>0.28</b><br><b>(0.07, 0.92)</b> | 0.49<br>(0.14, 1.15)               | 0.76<br>(0.29, 1.85) | <b>LHC</b>                          | 0.81<br>(0.33, 2.19) | 0.88<br>(0.34, 2.45)  | 0.78 (0.3, 1.51)      | 1 (0.39, 2.6)                       | 0.62<br>(0.25, 1.28)               | 1.07<br>(0.56, 2.09)                |
| 1.02<br>(0.41, 2.19)  | 0.9 (0.36, 1.94)     | 1.55<br>(0.62, 3.77)               | 0.35<br>(0.08, 1.14)               | 0.62<br>(0.18, 1.16)               | 0.94<br>(0.34, 2.23) | 1.24<br>(0.46, 3.05)                | <b>LIBEC</b>         | 1.08 (0.4, 2.89)      | 0.96<br>(0.36, 1.8)   | 1.24<br>(0.45, 3.11)                | 0.77<br>(0.29, 1.57)               | 1.33<br>(0.64, 2.55)                |
| 0.95<br>(0.36, 2.1)   | 0.84<br>(0.41, 1.41) | 1.42<br>(0.57, 3.58)               | 0.32<br>(0.07, 1.03)               | 0.56<br>(0.15, 1.33)               | 0.88<br>(0.46, 1.35) | 1.14<br>(0.41, 2.92)                | 0.92<br>(0.35, 2.51) | <b>LIBUD</b>          | 0.88<br>(0.32, 1.77)  | 1.14 (0.4, 2.97)                    | 0.71<br>(0.29, 1.4)                | 1.22<br>(0.57, 2.45)                |
| 1.07<br>(0.61, 2.25)  | 0.95<br>(0.53, 1.94) | 1.62 (0.9, 4.02)                   | 0.37 (0.1, 1.17)                   | 0.63 (0.3, 1.19)                   | 0.99<br>(0.51, 2.3)  | 1.28<br>(0.66, 3.36)                | 1.04<br>(0.56, 2.81) | 1.14<br>(0.56, 3.13)  | <b>MoHdDX</b>         | 1.28<br>(0.64, 3.37)                | 0.81<br>(0.49, 1.43)               | 1.39<br>(0.99, 2.56)                |
| 0.83<br>(0.35, 1.82)  | 0.73 (0.3, 1.61)     | 1.25<br>(0.53, 3.17)               | <b>0.28</b><br><b>(0.06, 0.93)</b> | 0.49<br>(0.14, 1.17)               | 0.76<br>(0.29, 1.89) | 1 (0.39, 2.56)                      | 0.81<br>(0.32, 2.2)  | 0.88<br>(0.34, 2.47)  | 0.78 (0.3, 1.56)      | <b>MoLdDX</b>                       | 0.62<br>(0.25, 1.31)               | 1.07<br>(0.55, 2.13)                |
| 1.34<br>(0.72, 2.69)  | 1.18<br>(0.65, 2.25) | <b>2.02</b><br><b>(1.06, 4.74)</b> | 0.46<br>(0.12, 1.43)               | 0.79 (0.3, 1.67)                   | 1.23<br>(0.65, 2.5)  | 1.61<br>(0.78, 3.97)                | 1.3 (0.64, 3.39)     | 1.42<br>(0.72, 3.48)  | 1.24 (0.7, 2.03)      | 1.61<br>(0.76, 4.01)                | <b>MoMdDX</b>                      | <b>1.74</b><br><b>(1.15, 3.01)</b>  |
| 0.77<br>(0.46, 1.18)  | 0.68 (0.4, 1.06)     | 1.16<br>(0.68, 2.14)               | <b>0.26</b><br><b>(0.07, 0.73)</b> | <b>0.45</b><br><b>(0.17, 0.85)</b> | 0.71<br>(0.36, 1.31) | 0.93<br>(0.48, 1.8)                 | 0.75<br>(0.39, 1.57) | 0.82<br>(0.41, 1.74)  | 0.72<br>(0.39, 1.01)  | 0.93<br>(0.47, 1.83)                | <b>0.58</b><br><b>(0.33, 0.87)</b> | <b>PLACEBO</b>                      |

**eFigure 12. Direct Evidence from the Pair Wise Comparisons for BPD at 28 Days**

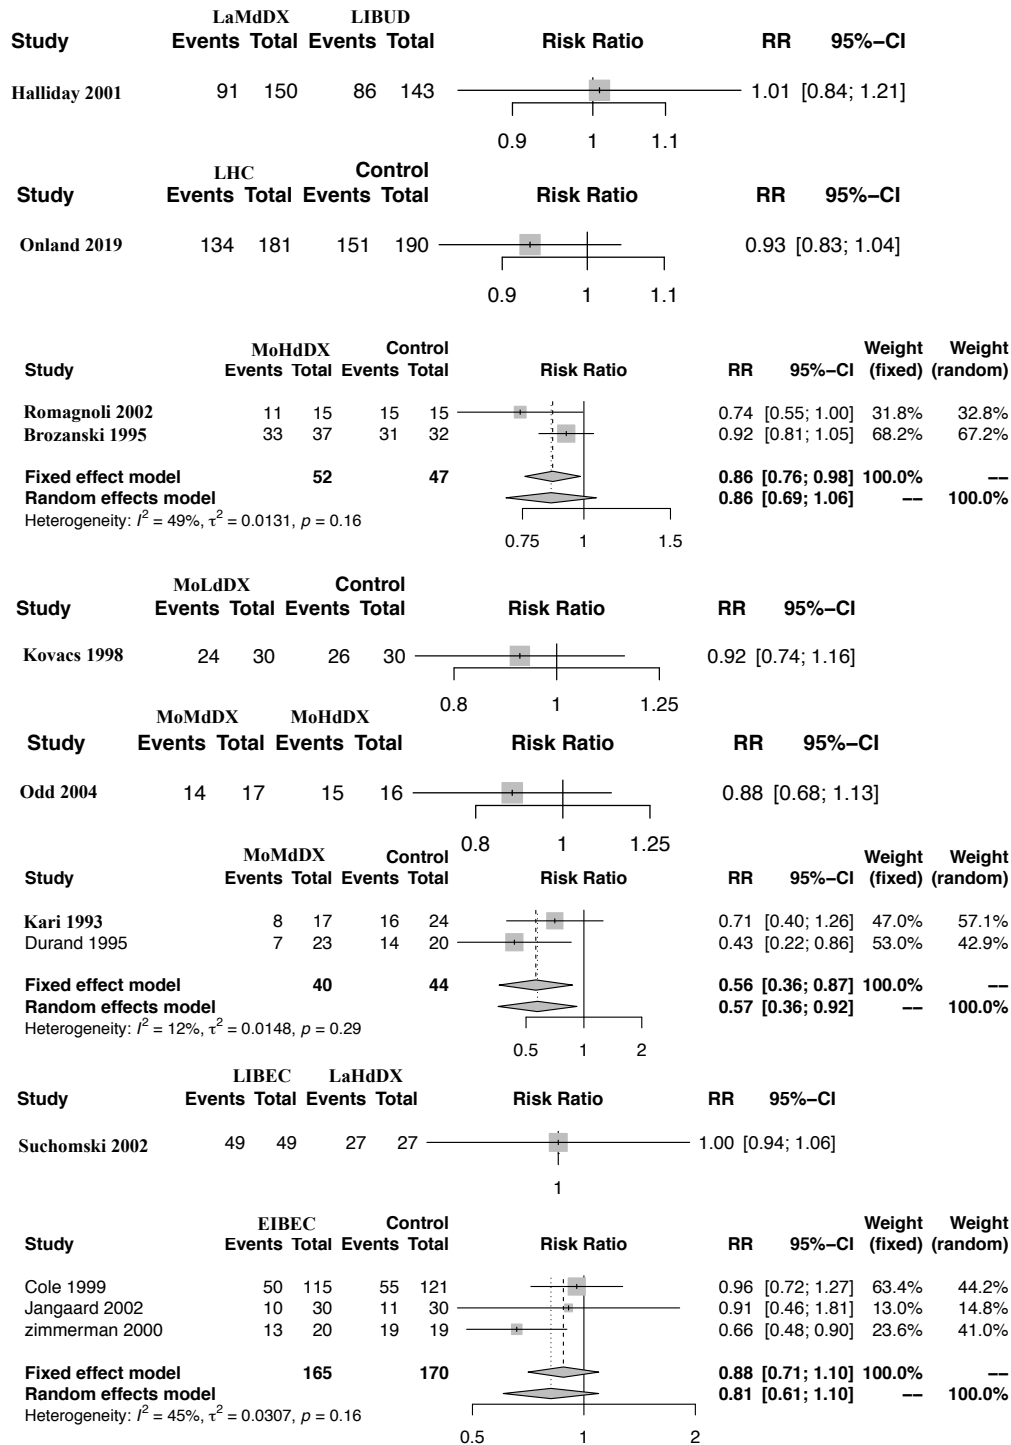

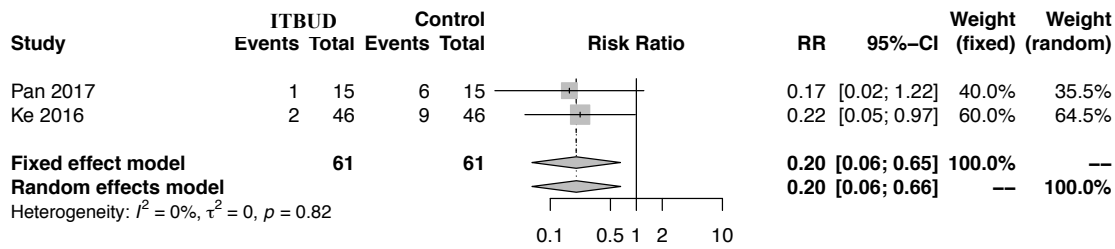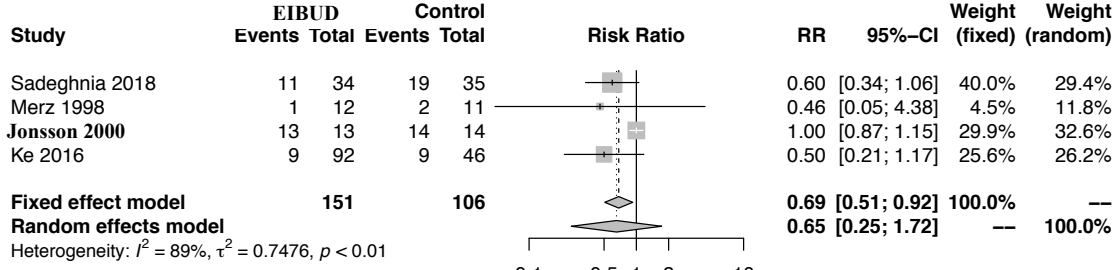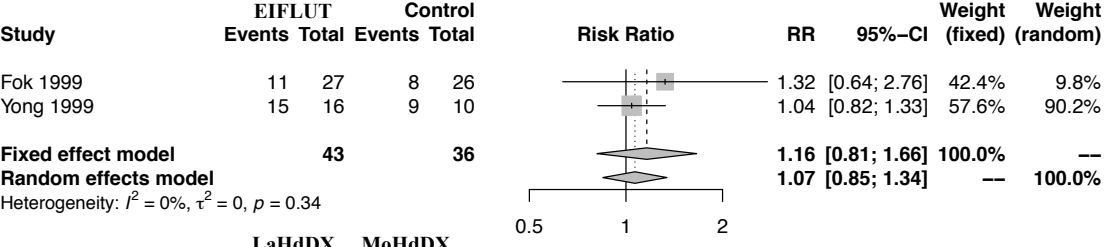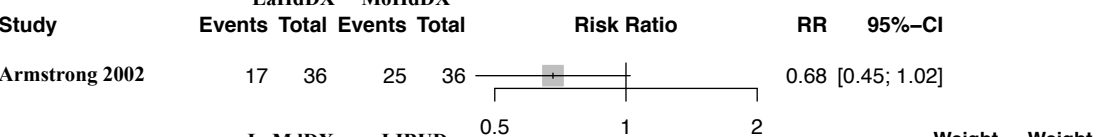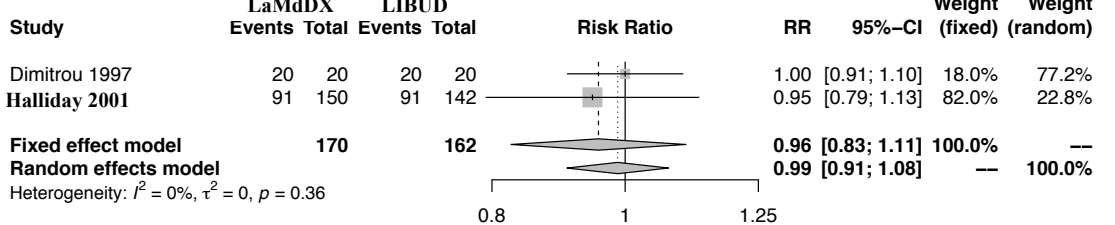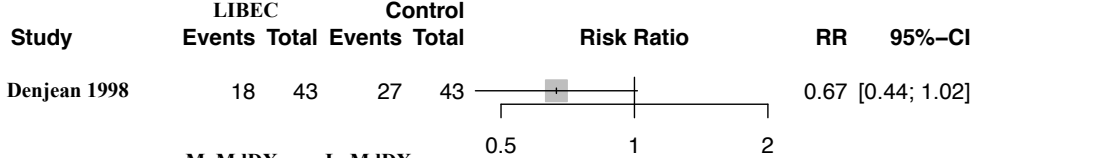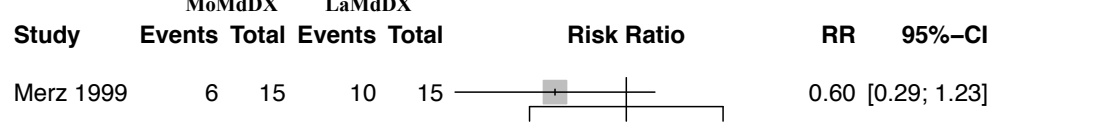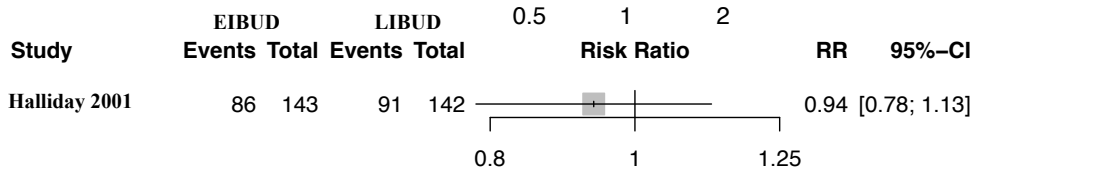

**eFigure 13. Split Between Direct and Indirect Evidence for BPD at 28 Days**

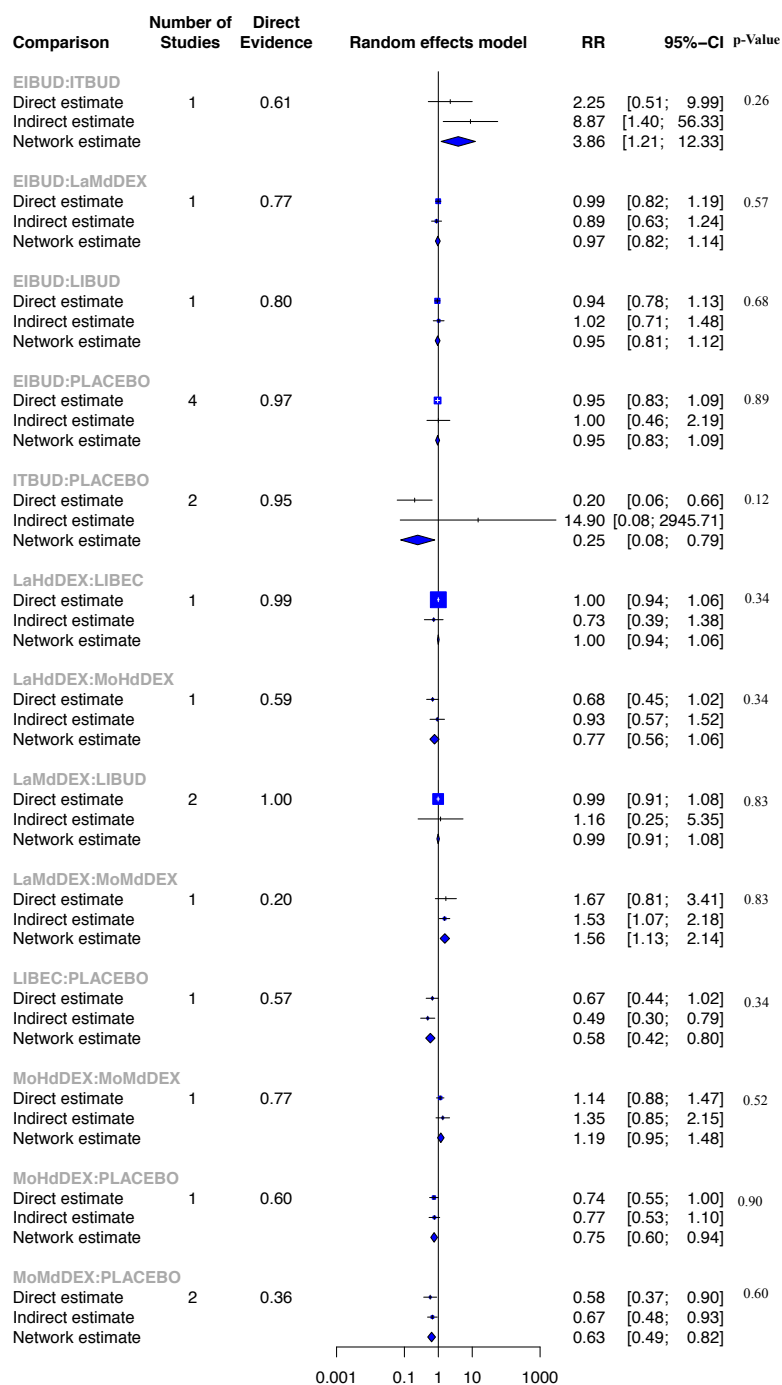

**eFigure 14. Network Plot (A), SUCRA Plot with SUCRA Values (%) (B), and Forest Plot (C) Depicting the Network Estimates [RR (95% CrI)] of the Various Interventions with “Placebo” as the Common Comparator for Mortality (C)**

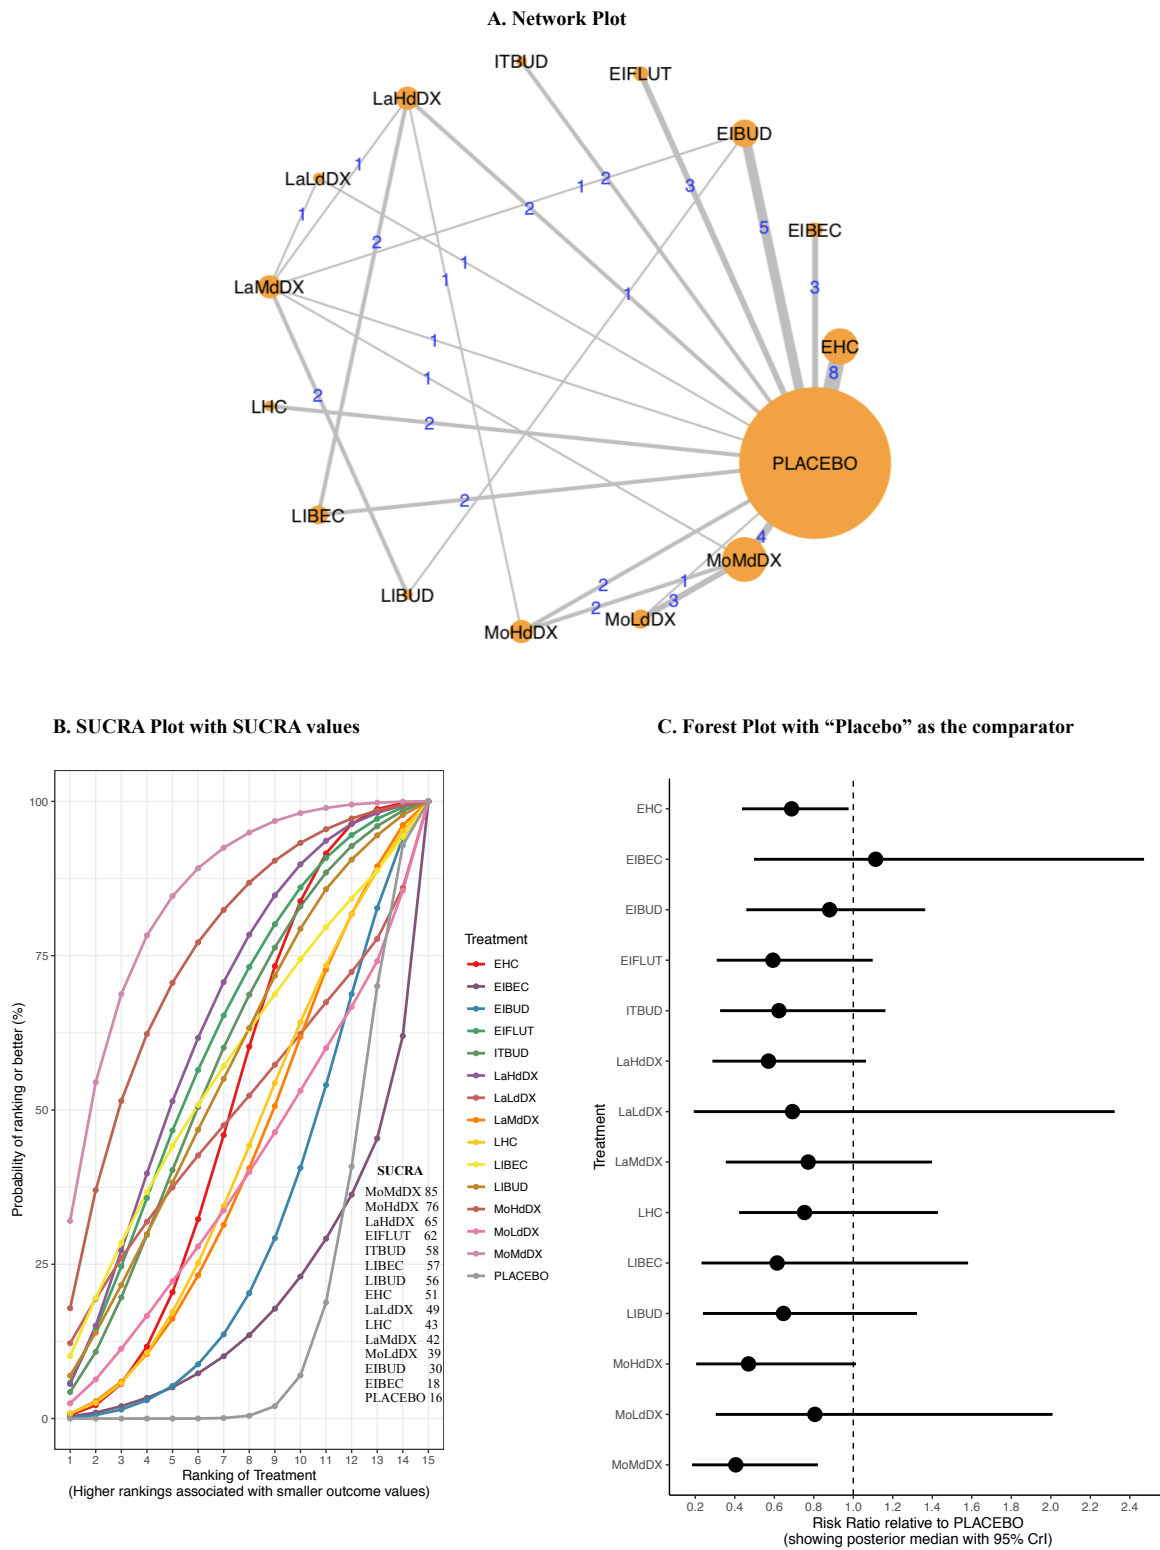



**eFigure 15. League Plot Depicting the Network Estimates [RR (95% CrI)] of Postnatal Corticosteroids Comparisons for Mortality**

| Comparator | Treatment                |                      |                      |                      |                      |                      |                      |                          |                      |                      |                      |                      |                      |                      |                          |
|------------|--------------------------|----------------------|----------------------|----------------------|----------------------|----------------------|----------------------|--------------------------|----------------------|----------------------|----------------------|----------------------|----------------------|----------------------|--------------------------|
|            | MoMdDX                   | MoHdDX               | LaHdDX               | EIFLUT               | ITBUD                | LIBEC                | LIBUD                | EHC                      | LaLdDX               | LHC                  | LaMdDX               | MoLdDX               | EIBUD                | EIBEC                | PLACEBO                  |
| MoMdDX     |                          | 1.28<br>(0.50, 2.79) | 1.59<br>(0.55, 3.71) | 1.67<br>(0.56, 4.02) | 1.76<br>(0.59, 4.27) | 1.85<br>(0.47, 5.13) | 1.81<br>(0.50, 4.44) | 1.86<br>(0.74, 3.95)     | 2.25<br>(0.41, 7.21) | 2.15<br>(0.76, 5.24) | 2.12<br>(0.71, 4.84) | 2.26<br>(0.75, 5.39) | 2.36<br>(0.86, 5.15) | 3.26<br>(0.94, 8.40) | **2.69**<br>(1.22, 5.45) |
| MoHdDX     | 0.94<br>(0.36, 2.00)     |                      | 1.35<br>(0.49, 3.05) | 1.45<br>(0.46, 3.60) | 1.53<br>(0.48, 3.77) | 1.59<br>(0.40, 4.41) | 1.57<br>(0.40, 3.97) | 1.61<br>(0.60, 3.54)     | 1.96<br>(0.34, 6.41) | 1.86<br>(0.63, 4.62) | 1.84<br>(0.56, 4.34) | 2.03<br>(0.54, 5.39) | 2.06<br>(0.69, 4.60) | 2.82<br>(0.78, 7.41) | 2.34<br>(0.99, 4.90)     |
| LaHdDX     | 0.80<br>(0.27, 1.82)     | 0.92<br>(0.33, 2.04) |                      | 1.16<br>(0.42, 2.62) | 1.23<br>(0.44, 2.77) | 1.23<br>(0.41, 2.95) | 1.26<br>(0.37, 2.91) | 1.29<br>(0.56, 2.57)     | 1.56<br>(0.30, 4.81) | 1.49<br>(0.57, 3.41) | 1.47<br>(0.53, 3.10) | 1.66<br>(0.46, 4.29) | 1.65<br>(0.64, 3.35) | 2.27<br>(0.70, 5.58) | 1.87<br>(0.94, 3.49)     |
| EIFLUT     | 0.77<br>(0.25, 1.77)     | 0.90<br>(0.28, 2.18) | 1.07<br>(0.38, 2.37) |                      | 1.17<br>(0.43, 2.59) | 1.23<br>(0.33, 3.26) | 1.21<br>(0.33, 2.82) | 1.23<br>(0.53, 2.39)     | 1.49<br>(0.28, 4.59) | 1.42<br>(0.55, 3.16) | 1.42<br>(0.47, 3.08) | 1.60<br>(0.42, 4.12) | 1.58<br>(0.59, 3.18) | 2.16<br>(0.68, 5.25) | 1.79<br>(0.91, 3.24)     |
| ITBUD      | 0.73<br>(0.23, 1.69)     | 0.86<br>(0.27, 2.07) | 1.01<br>(0.36, 2.26) | 1.05<br>(0.39, 2.33) |                      | 1.17<br>(0.31, 3.09) | 1.15<br>(0.32, 2.67) | 1.17<br>(0.50, 2.26)     | 1.42<br>(0.27, 4.41) | 1.35<br>(0.52, 3.04) | 1.35<br>(0.45, 2.91) | 1.51<br>(0.40, 3.93) | 1.50<br>(0.56, 2.99) | 2.05<br>(0.64, 5.01) | 1.70<br>(0.86, 3.07)     |
| LIBEC      | 0.79<br>(0.19, 2.14)     | 0.92<br>(0.23, 2.51) | 1.04<br>(0.34, 2.44) | 1.14<br>(0.31, 3.07) | 1.20<br>(0.32, 3.23) |                      | 1.24<br>(0.28, 3.41) | 1.27<br>(0.39, 3.08)     | 1.54<br>(0.23, 5.28) | 1.47<br>(0.41, 3.99) | 1.45<br>(0.39, 3.77) | 1.63<br>(0.34, 4.81) | 1.62<br>(0.46, 4.02) | 2.23<br>(0.52, 6.46) | 1.84<br>(0.63, 4.32)     |
| LIBUD      | 0.75<br>(0.23, 2.02)     | 0.89<br>(0.25, 2.49) | 1.05<br>(0.34, 2.74) | 1.11<br>(0.35, 3.01) | 1.17<br>(0.37, 3.17) | 1.21<br>(0.29, 3.56) |                      | 1.22<br>(0.46, 2.92)     | 1.46<br>(0.27, 4.86) | 1.43<br>(0.47, 4.00) | 1.29<br>(0.62, 2.53) | 1.57<br>(0.39, 4.54) | 1.47<br>(0.68, 2.92) | 2.15<br>(0.59, 6.18) | 1.78<br>(0.76, 4.20)     |
| EHC        | 0.65<br>(0.25, 1.36)     | 0.76<br>(0.28, 1.68) | 0.90<br>(0.39, 1.80) | 0.94<br>(0.42, 1.88) | 0.99<br>(0.44, 2.00) | 1.04<br>(0.32, 2.56) | 1.02<br>(0.34, 2.16) |                          | 1.26<br>(0.27, 3.72) | 1.20<br>(0.57, 2.49) | 1.20<br>(0.49, 2.33) | 1.34<br>(0.42, 3.22) | 1.33<br>(0.63, 2.32) | 1.82<br>(0.68, 4.11) | **1.51**<br>(1.02, 2.29) |
| LaLdDX     | 0.76<br>(0.14, 2.47)     | 0.90<br>(0.16, 2.96) | 1.06<br>(0.21, 3.35) | 1.11<br>(0.22, 3.53) | 1.17<br>(0.23, 3.74) | 1.23<br>(0.19, 4.27) | 1.18<br>(0.21, 3.74) | 1.23<br>(0.27, 3.66)     |                      | 1.43<br>(0.29, 4.54) | 1.37<br>(0.29, 4.12) | 1.59<br>(0.24, 5.57) | 1.56<br>(0.33, 4.62) | 2.16<br>(0.37, 7.28) | 1.79<br>(0.43, 5.20)     |
| LHC        | 0.59<br>(0.19, 1.32)     | 0.69<br>(0.22, 1.59) | 0.82<br>(0.29, 1.75) | 0.86<br>(0.32, 1.83) | 0.90<br>(0.33, 1.93) | 0.95<br>(0.25, 2.46) | 0.94<br>(0.25, 2.11) | 0.95<br>(0.40, 1.75)     | 1.15<br>(0.22, 3.50) |                      | 1.10<br>(0.36, 2.30) | 1.23<br>(0.32, 3.10) | 1.22<br>(0.44, 2.33) | 1.67<br>(0.52, 3.91) | 1.38<br>(0.70, 2.37)     |
| LaMdDX     | 0.60<br>(0.21, 1.42)     | 0.71<br>(0.23, 1.77) | 0.83<br>(0.32, 1.88) | 0.88<br>(0.32, 2.12) | 0.93<br>(0.34, 2.22) | 0.97<br>(0.27, 2.58) | 0.88<br>(0.40, 1.61) | 0.97<br>(0.43, 2.02)     | 1.15<br>(0.24, 3.47) | 1.14<br>(0.44, 2.78) |                      | 1.25<br>(0.35, 3.29) | 1.19<br>(0.61, 2.09) | 1.71<br>(0.54, 4.41) | 1.42<br>(0.72, 2.82)     |
| MoLdDX     | 0.57<br>(0.19, 1.33)     | 0.69<br>(0.19, 1.87) | 0.84<br>(0.23, 2.20) | 0.88<br>(0.24, 2.36) | 0.92<br>(0.25, 2.48) | 0.97<br>(0.21, 2.91) | 0.94<br>(0.22, 2.59) | 0.97<br>(0.31, 2.35)     | 1.18<br>(0.18, 4.11) | 1.13<br>(0.32, 3.08) | 1.11<br>(0.30, 2.87) |                      | 1.23<br>(0.37, 3.03) | 1.71<br>(0.41, 4.90) | 1.41<br>(0.50, 3.29)     |
| EIBUD      | 0.52<br>(0.19, 1.16)     | 0.61<br>(0.22, 1.45) | 0.72<br>(0.30, 1.57) | 0.76<br>(0.31, 1.68) | 0.80<br>(0.33, 1.79) | 0.84<br>(0.25, 2.16) | 0.78<br>(0.34, 1.47) | 0.84<br>(0.43, 1.59)     | 1.01<br>(0.22, 3.07) | 0.98<br>(0.43, 2.25) | 0.92<br>(0.48, 1.64) | 1.08<br>(0.33, 2.72) |                      | 1.48<br>(0.52, 3.61) | 1.22<br>(0.73, 2.18)     |
| EIBEC      | 0.42<br>(0.12, 1.06)     | 0.49<br>(0.13, 1.29) | 0.58<br>(0.18, 1.43) | 0.61<br>(0.19, 1.48) | 0.64<br>(0.20, 1.56) | 0.67<br>(0.15, 1.91) | 0.66<br>(0.16, 1.68) | 0.67<br>(0.24, 1.46)     | 0.82<br>(0.14, 2.69) | 0.78<br>(0.26, 1.91) | 0.78<br>(0.23, 1.86) | 0.87<br>(0.20, 2.42) | 0.86<br>(0.28, 1.93) |                      | 0.98<br>(0.40, 2.01)     |
| PLACEBO    | **0.43**<br>(0.18, 0.82) | 0.51<br>(0.20, 1.01) | 0.60<br>(0.29, 1.06) | 0.62<br>(0.31, 1.10) | 0.65<br>(0.33, 1.16) | 0.69<br>(0.23, 1.58) | 0.68<br>(0.24, 1.32) | **0.69**<br>(0.44, 0.98) | 0.84<br>(0.19, 2.32) | 0.80<br>(0.42, 1.43) | 0.80<br>(0.35, 1.40) | 0.89<br>(0.30, 2.01) | 0.89<br>(0.46, 1.36) | 1.21<br>(0.50, 2.47) |                          |

**eFigure 16. Direct Evidence from the Pair Wise Comparisons for Mortality**

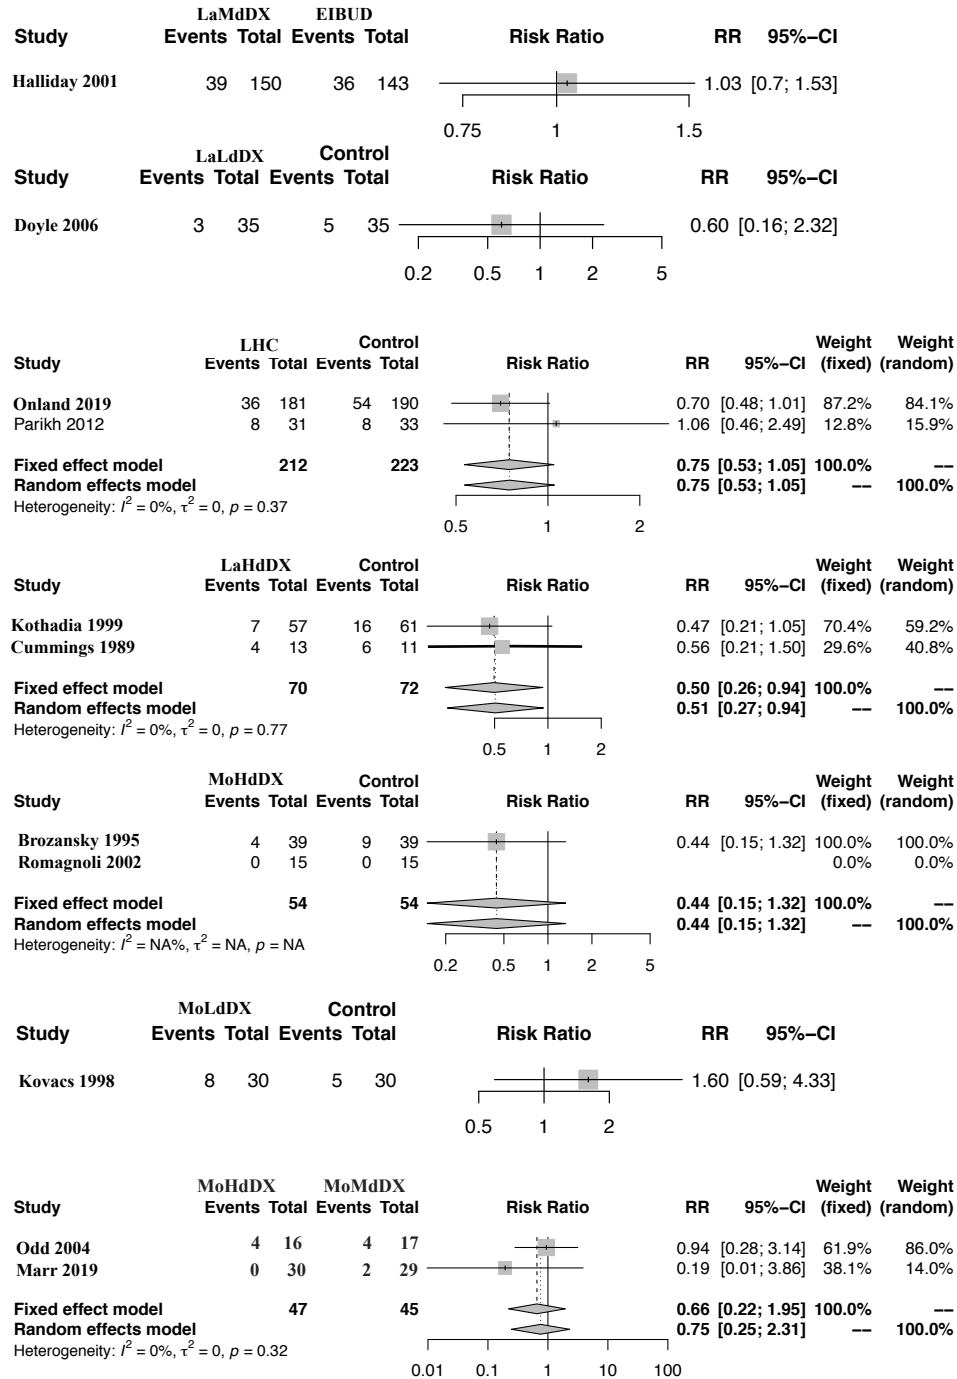

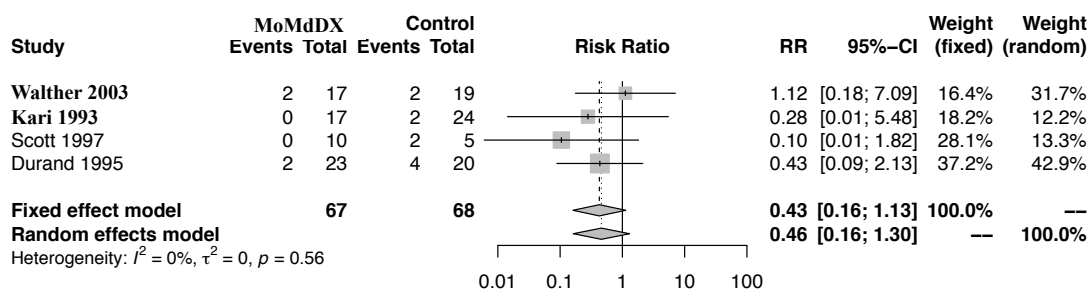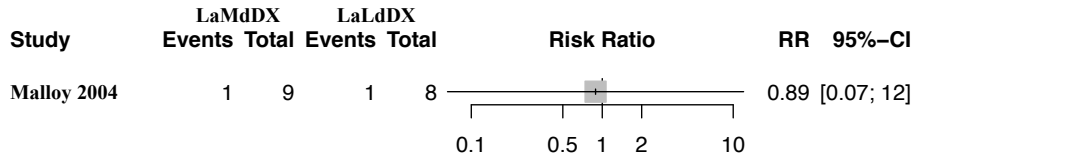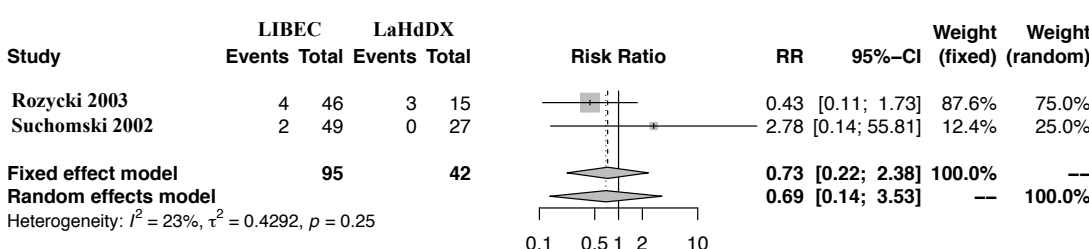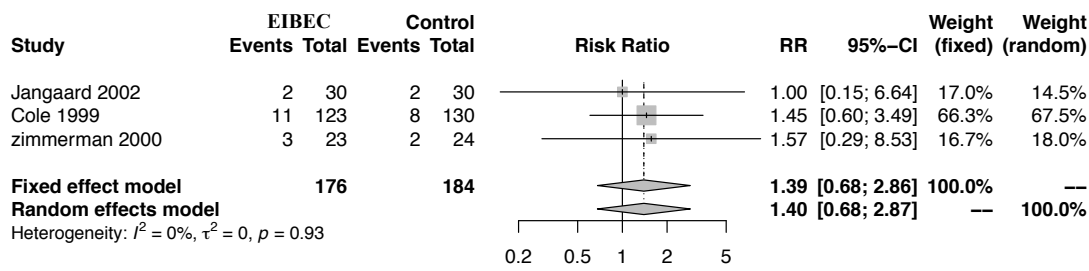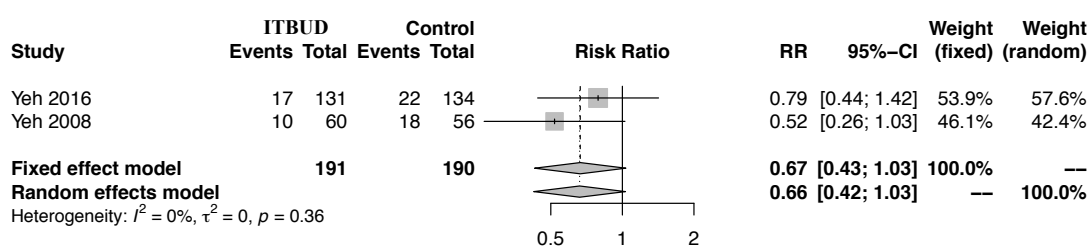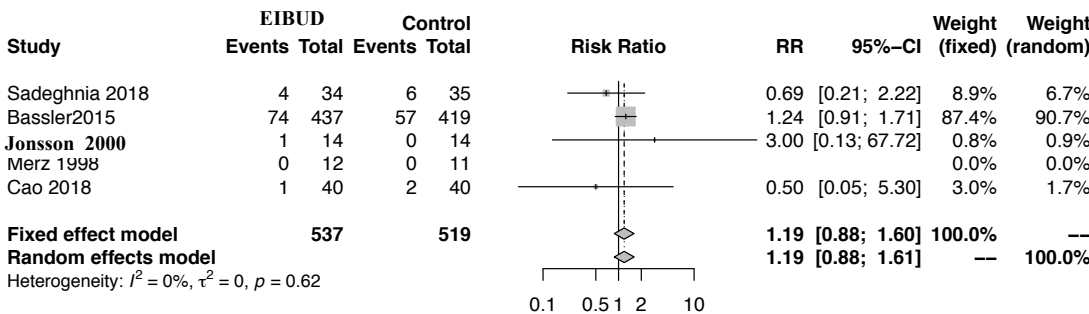

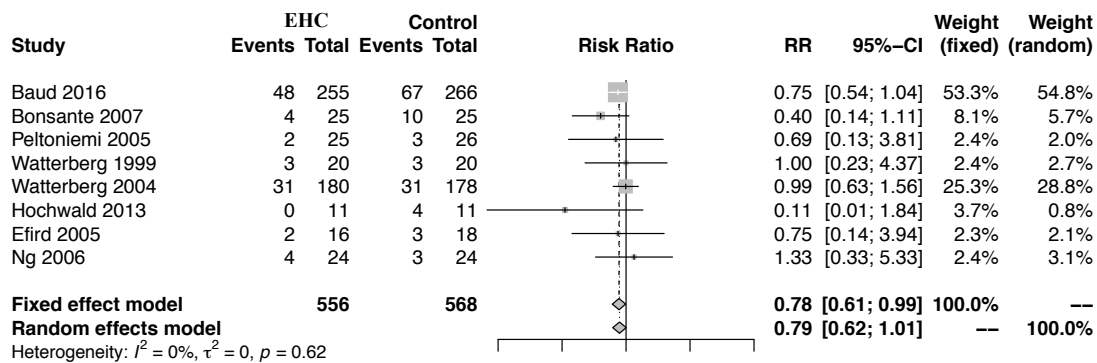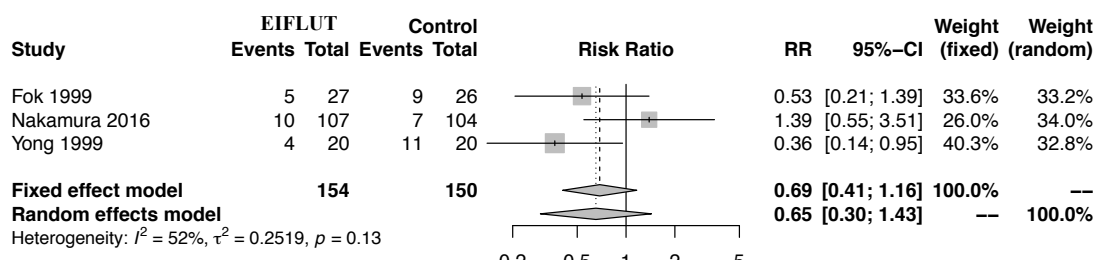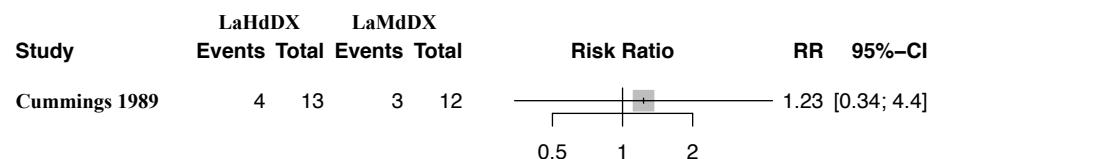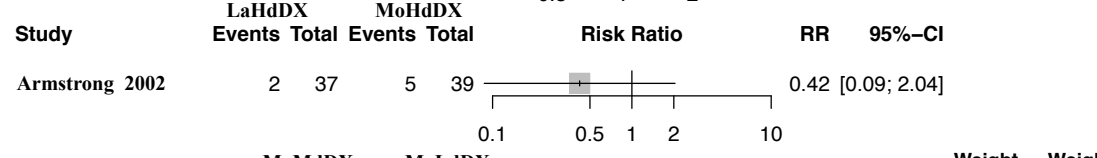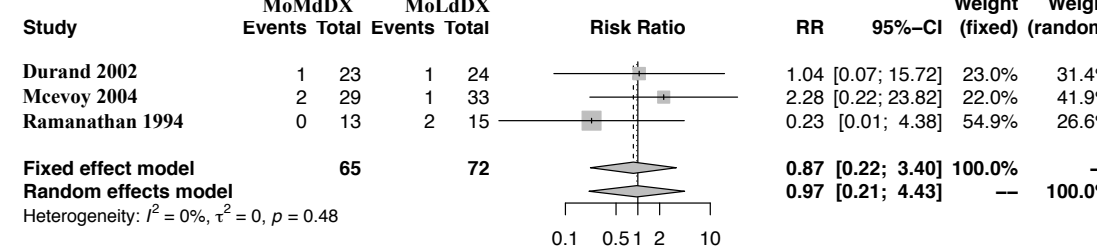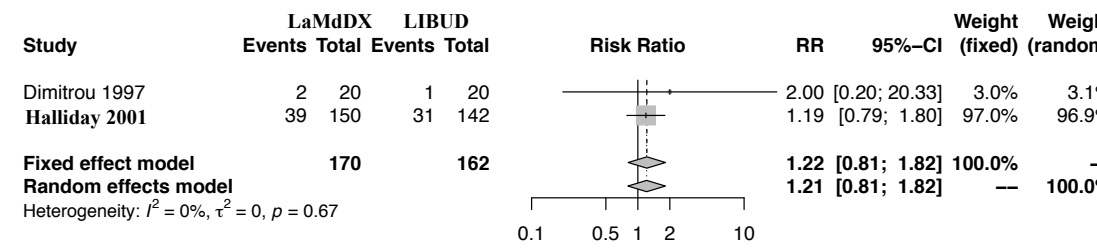

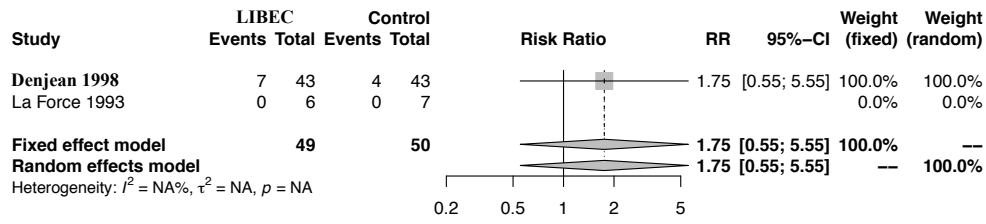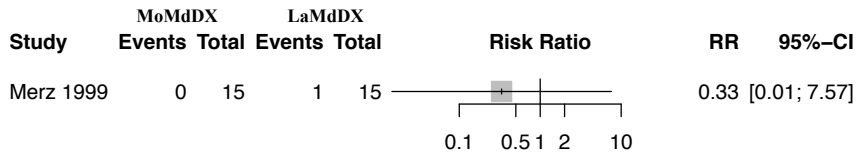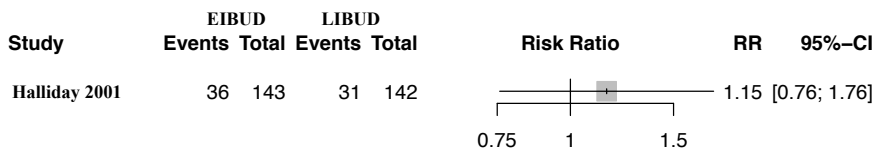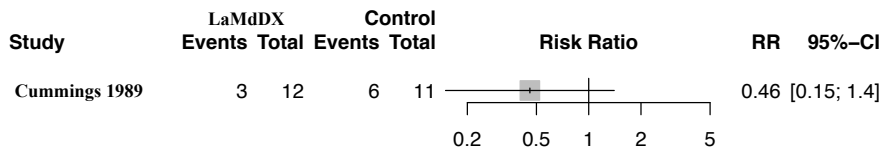

**eFigure 17. Split Between Direct and Indirect Evidence for Mortality**

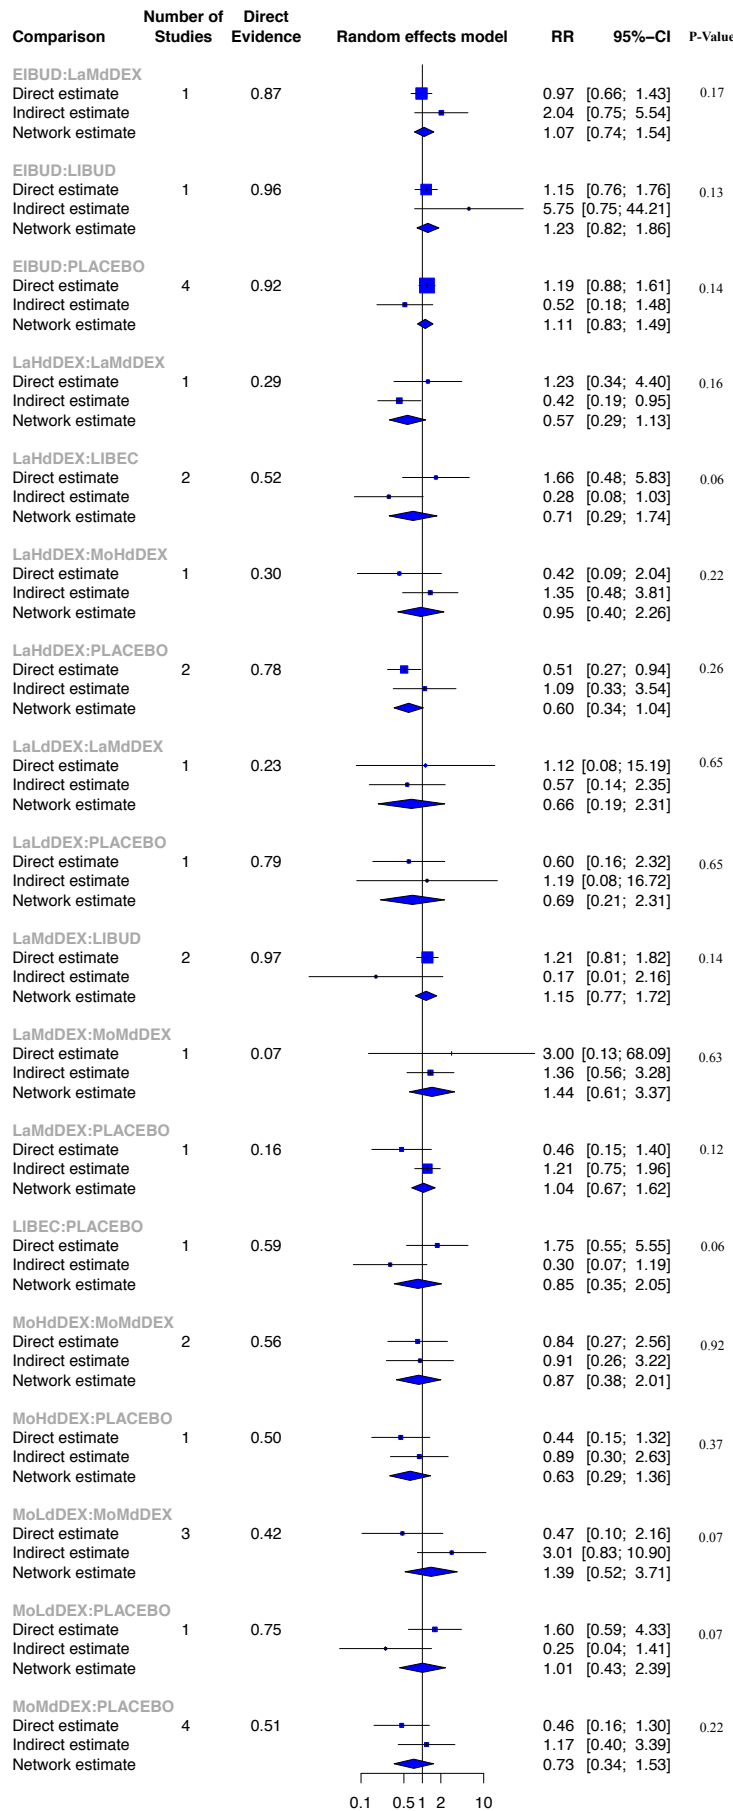

**eFigure 18. Network Plot for BPD (A), SUCRA Plot with SUCRA Values (%) (B), and Forest Plot Depicting the Network Estimates [RR (95% CrI)] of the Various Interventions with “Placebo” as the Common Comparator for Successful Extubation (C)**

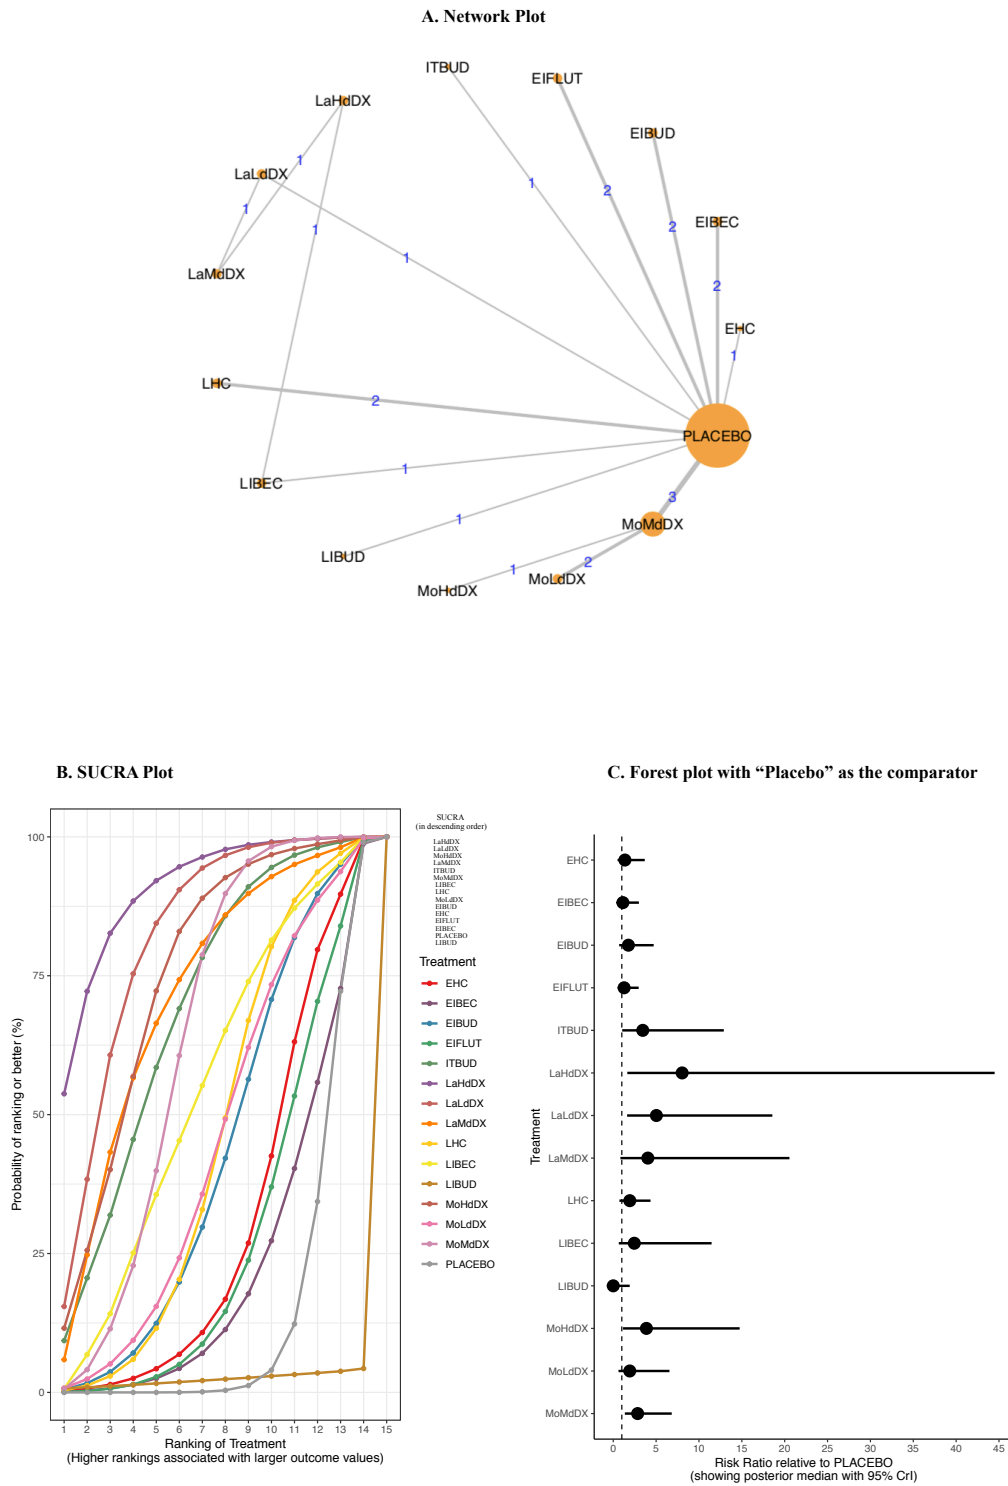

# eFigure 19. League Plot Depicting the Network Estimates [RR (95% CrI)] of Postnatal Corticosteroids Comparisons for Successful Extubation

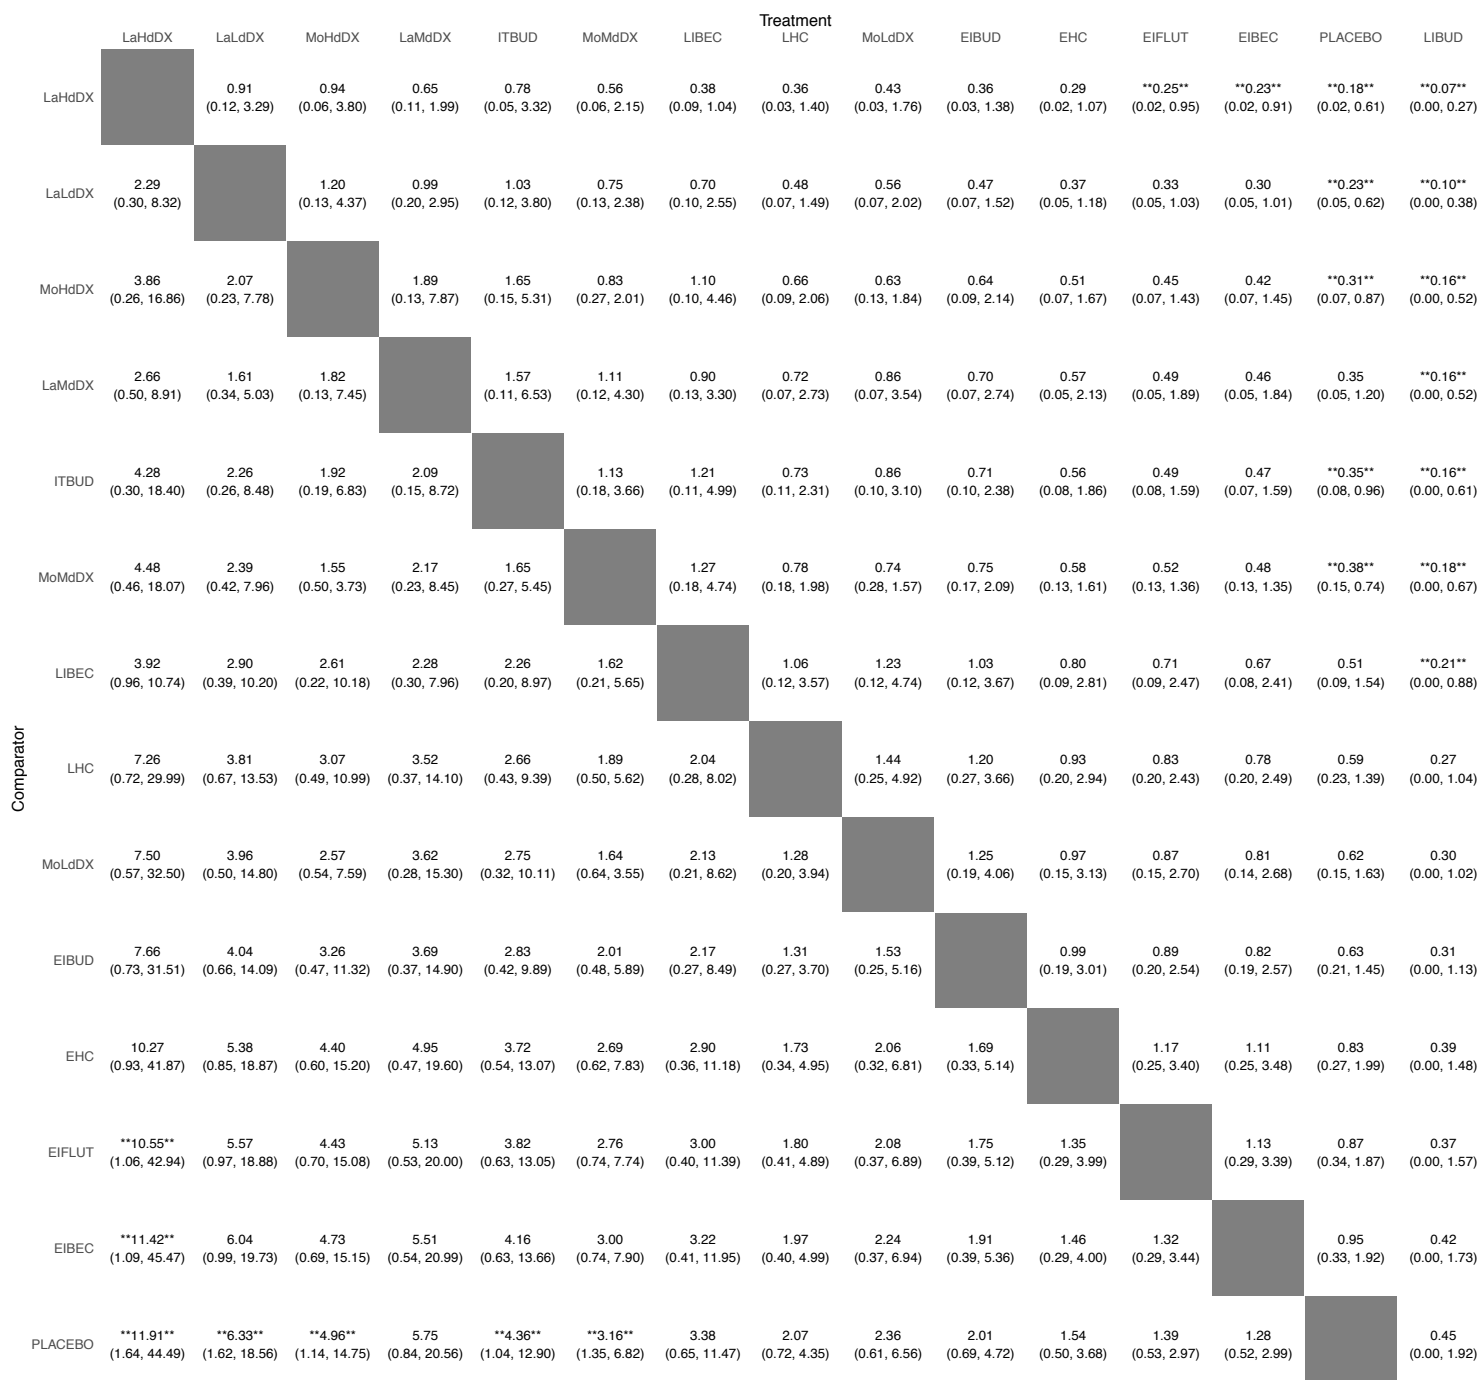



**eFigure 20. Direct Evidence from the Pair Wise Comparisons for Successful Extubation**

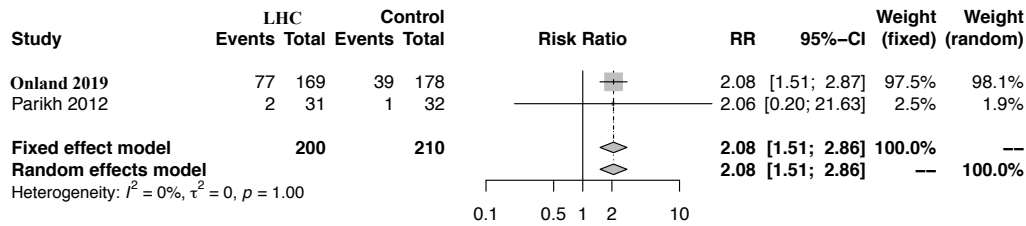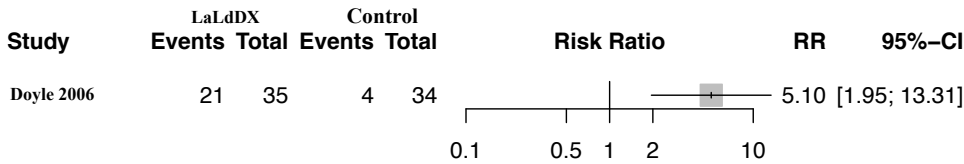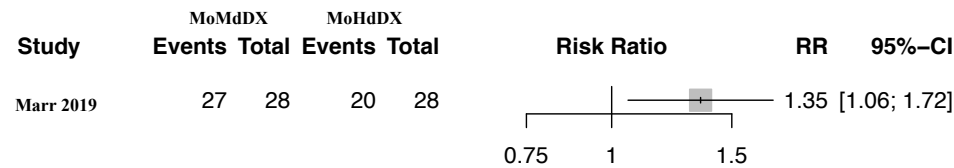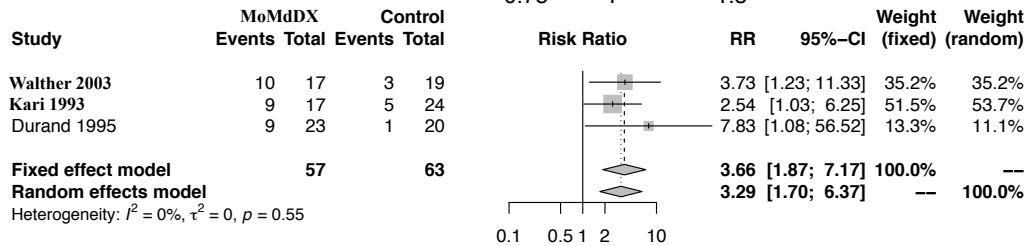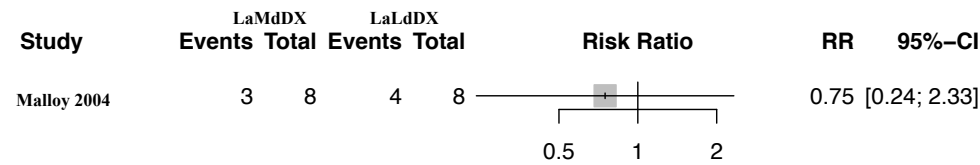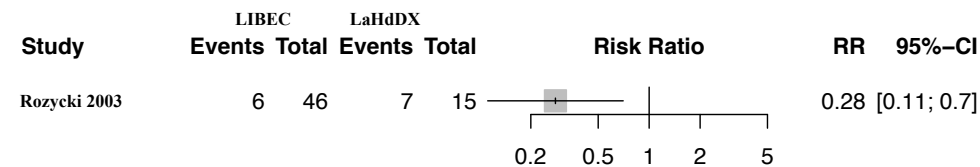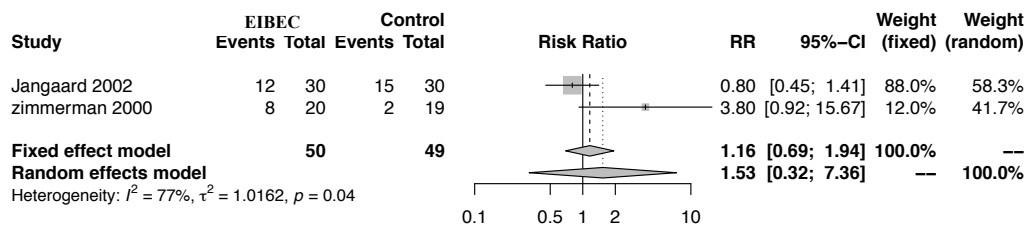

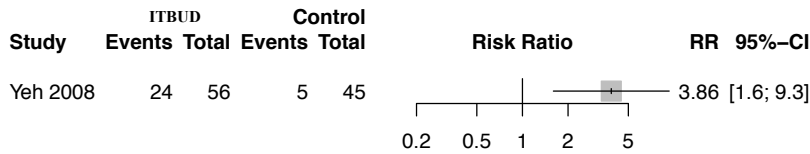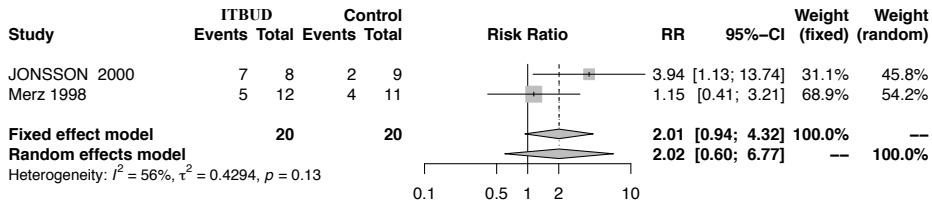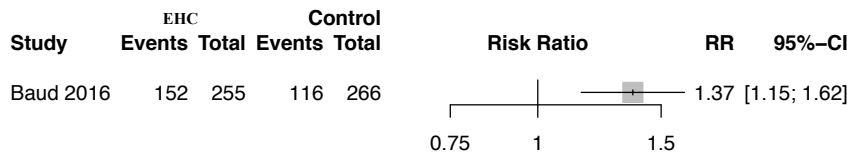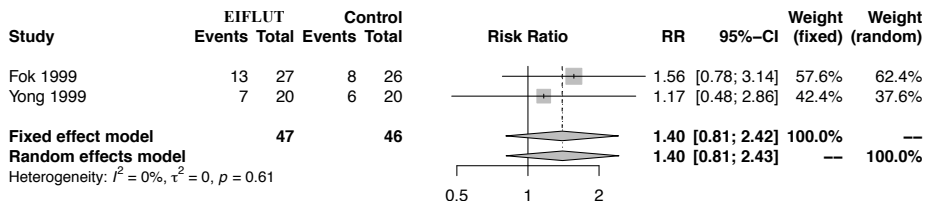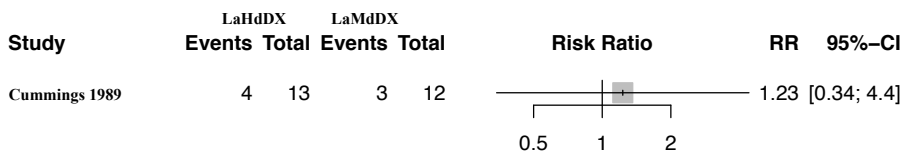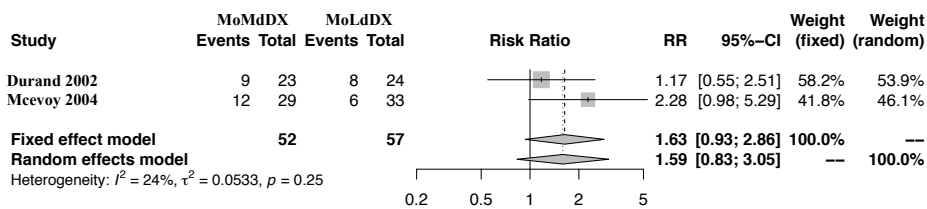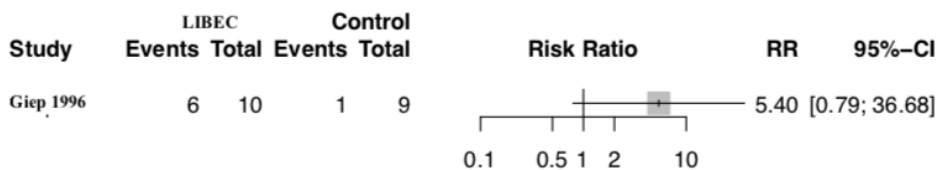

## eFigure 21. Split Between Direct and Indirect Evidence for Successful Extubation

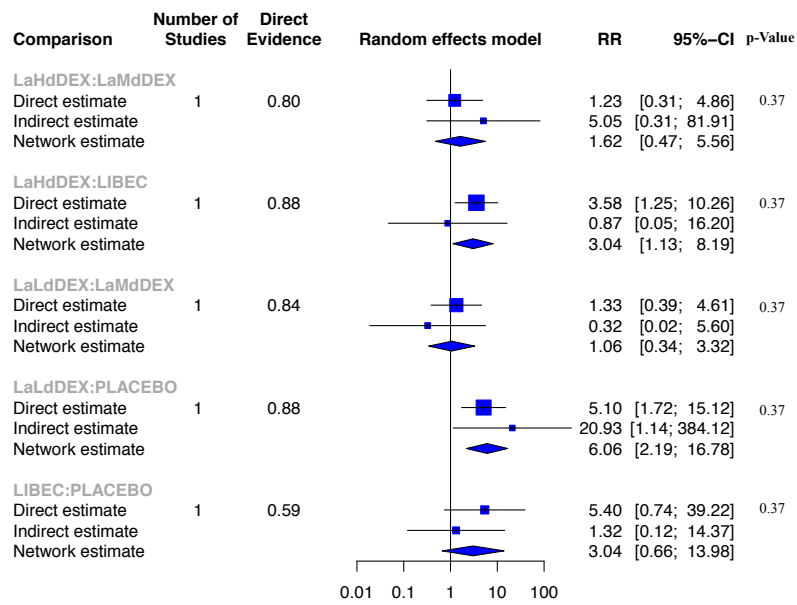

**eFigure 22. Network Plot (A), SUCRA Plot with SUCRA Values (%) (B), and Forest Plot Depicting the Network Estimates [RR (95% CrI)] of the Various Interventions with “LaMddX” as the Common Comparator for NDI at 18-24 Months (C)**

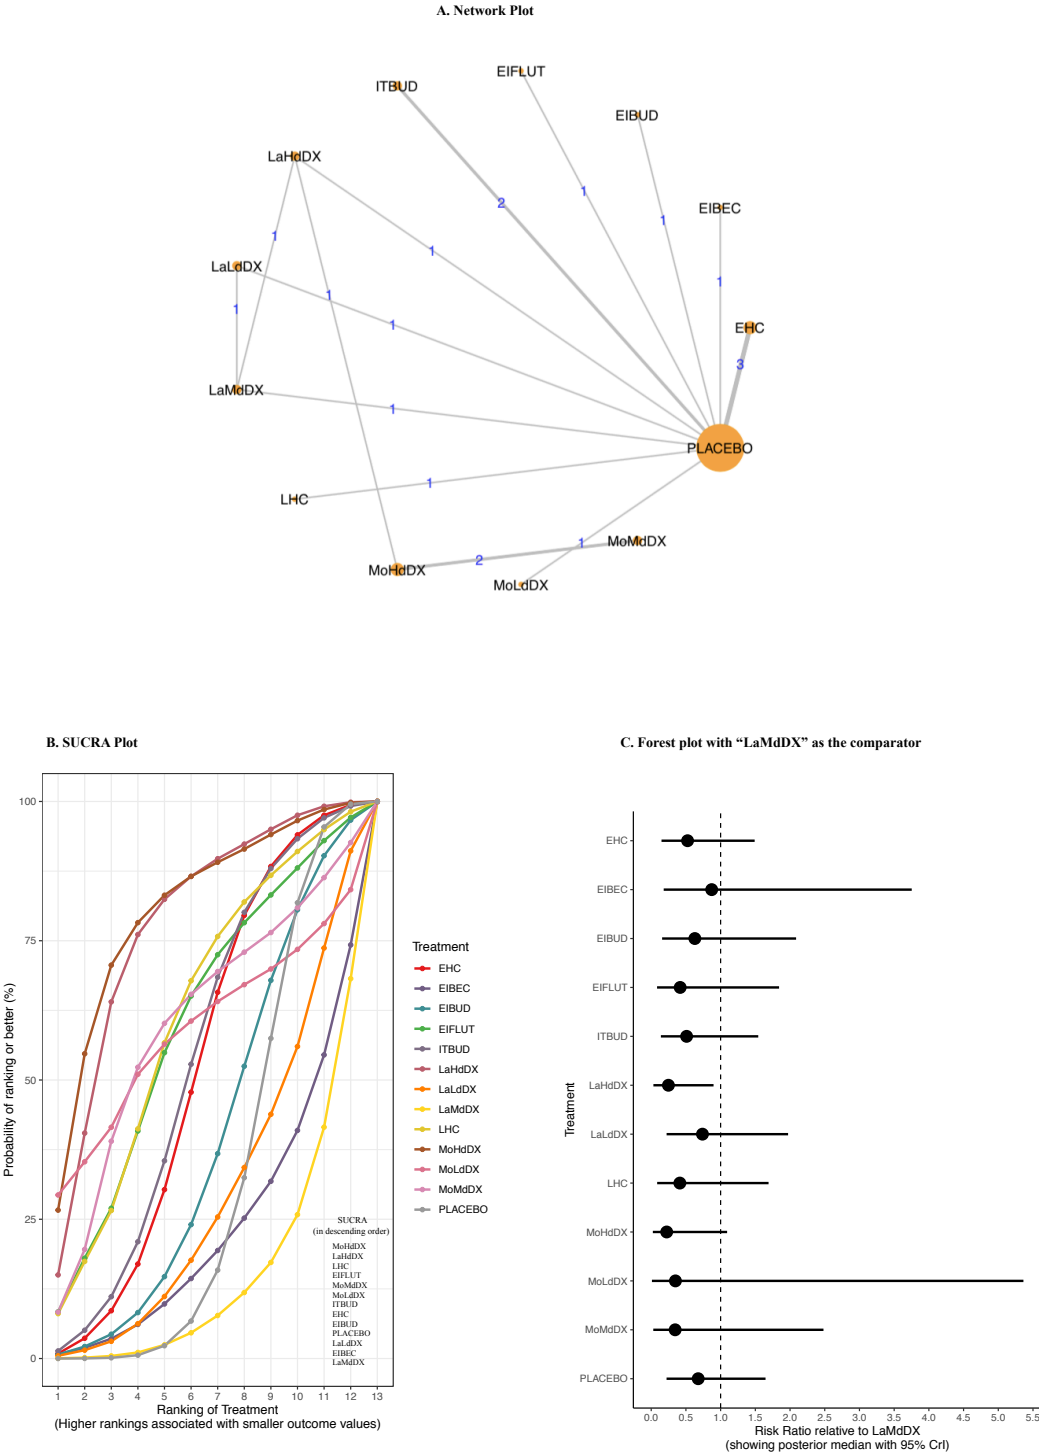

**eFigure 23. League Plot Depicting the Network Estimates [RR (95% CrI)] of Postnatal Corticosteroids Comparisons for NDI at 18-24 Months**

|         | Treatment             |                          |                       |                       |                        |                       |                       |                       |                        |                        |                        |                        |                           |
|---------|-----------------------|--------------------------|-----------------------|-----------------------|------------------------|-----------------------|-----------------------|-----------------------|------------------------|------------------------|------------------------|------------------------|---------------------------|
|         | MoHdDX                | LaHdDX                   | LHC                   | EIFLUT                | MoMdDX                 | MoLdDX                | ITBUD                 | EHC                   | EIBUD                  | PLACEBO                | LaLdDX                 | EIBEC                  | LaMdDX                    |
| MoHdDX  |                       | 1.23<br>(0.42, 2.81)     | 4.61<br>(0.23, 22.63) | 5.31<br>(0.23, 24.15) | 1.85<br>(0.58, 4.75)   | 9.28<br>(0.04, 45.79) | 5.02<br>(0.35, 23.71) | 5.02<br>(0.36, 23.93) | 6.67<br>(0.41, 30.37)  | 6.00<br>(0.52, 28.98)  | 7.09<br>(0.50, 33.37)  | 10.18<br>(0.48, 50.10) | 9.11<br>(0.91, 42.50)     |
| LaHdDX  | 1.04<br>(0.36, 2.35)  |                          | 3.56<br>(0.26, 17.33) | 3.76<br>(0.25, 18.69) | 1.99<br>(0.38, 6.13)   | 6.76<br>(0.04, 36.04) | 3.88<br>(0.40, 18.10) | 3.95<br>(0.42, 18.10) | 5.06<br>(0.47, 23.31)  | 4.75<br>(0.60, 21.67)  | 5.60<br>(0.58, 25.59)  | 7.87<br>(0.54, 37.94)  | **7.13**<br>(1.11, 31.65) |
| LHC     | 1.12<br>(0.04, 4.30)  | 0.98<br>(0.06, 3.82)     |                       | 1.52<br>(0.21, 5.13)  | 2.40<br>(0.06, 9.08)   | 2.64<br>(0.03, 14.48) | 1.57<br>(0.34, 4.52)  | 1.57<br>(0.36, 4.42)  | 2.04<br>(0.38, 6.03)   | 1.92<br>(0.55, 5.02)   | 2.41<br>(0.42, 7.46)   | 3.17<br>(0.45, 10.44)  | 3.54<br>(0.59, 11.65)     |
| EIFLUT  | 1.22<br>(0.04, 4.33)  | 0.99<br>(0.05, 3.93)     | 1.47<br>(0.19, 4.87)  |                       | 3.05<br>(0.06, 9.09)   | 2.70<br>(0.03, 14.63) | 1.57<br>(0.31, 4.66)  | 1.58<br>(0.33, 4.54)  | 2.05<br>(0.36, 6.19)   | 1.93<br>(0.49, 5.17)   | 2.42<br>(0.39, 7.60)   | 3.16<br>(0.42, 10.59)  | 3.50<br>(0.54, 11.85)     |
| MoMdDX  | 0.72<br>(0.21, 1.72)  | 0.90<br>(0.16, 2.66)     | 3.47<br>(0.11, 17.07) | 3.99<br>(0.11, 18.00) |                        | 6.99<br>(0.02, 34.55) | 3.87<br>(0.16, 18.55) | 3.72<br>(0.17, 18.50) | 4.97<br>(0.19, 23.64)  | 4.45<br>(0.24, 22.62)  | 5.24<br>(0.23, 26.58)  | 7.69<br>(0.23, 38.32)  | 6.65<br>(0.40, 33.42)     |
| MoLdDX  | 6.12<br>(0.02, 27.24) | 5.71<br>(0.03, 26.73)    | 9.06<br>(0.07, 38.85) | 9.25<br>(0.07, 39.93) | 12.07<br>(0.03, 51.42) |                       | 9.83<br>(0.10, 42.11) | 9.56<br>(0.11, 43.31) | 13.05<br>(0.12, 54.93) | 12.14<br>(0.15, 53.30) | 15.75<br>(0.14, 67.73) | 23.41<br>(0.15, 87.12) | 21.93<br>(0.19, 96.49)    |
| ITBUD   | 0.79<br>(0.04, 2.86)  | 0.71<br>(0.06, 2.49)     | 1.05<br>(0.22, 2.95)  | 1.09<br>(0.21, 3.20)  | 1.76<br>(0.05, 6.28)   | 1.89<br>(0.02, 9.70)  |                       | 1.14<br>(0.41, 2.47)  | 1.46<br>(0.41, 3.67)   | 1.40<br>(0.67, 2.62)   | 1.74<br>(0.45, 4.48)   | 2.24<br>(0.48, 6.52)   | 2.51<br>(0.65, 7.18)      |
| EHC     | 0.74<br>(0.04, 2.76)  | 0.67<br>(0.06, 2.36)     | 1.00<br>(0.23, 2.76)  | 1.04<br>(0.22, 3.02)  | 1.55<br>(0.05, 5.95)   | 1.83<br>(0.02, 9.51)  | 1.08<br>(0.40, 2.43)  |                       | 1.39<br>(0.43, 3.43)   | 1.34<br>(0.73, 2.36)   | 1.66<br>(0.47, 4.15)   | 2.14<br>(0.48, 6.19)   | 2.40<br>(0.67, 6.74)      |
| EIBUD   | 0.68<br>(0.03, 2.46)  | 0.60<br>(0.04, 2.15)     | 0.89<br>(0.17, 2.63)  | 0.94<br>(0.16, 2.80)  | 1.44<br>(0.04, 5.31)   | 1.62<br>(0.02, 8.35)  | 0.96<br>(0.27, 2.41)  | 0.97<br>(0.29, 2.31)  |                        | 1.18<br>(0.46, 2.54)   | 1.48<br>(0.33, 3.99)   | 1.93<br>(0.35, 5.77)   | 2.14<br>(0.48, 6.37)      |
| PLACEBO | 0.53<br>(0.03, 1.93)  | 0.50<br>(0.05, 1.67)     | 0.73<br>(0.20, 1.83)  | 0.76<br>(0.19, 2.03)  | 1.08<br>(0.04, 4.22)   | 1.33<br>(0.02, 6.79)  | 0.80<br>(0.38, 1.48)  | 0.81<br>(0.42, 1.36)  | 1.02<br>(0.39, 2.17)   |                        | 1.23<br>(0.43, 2.72)   | 1.57<br>(0.43, 4.10)   | 1.77<br>(0.61, 4.52)      |
| LaLdDX  | 0.54<br>(0.03, 2.00)  | 0.48<br>(0.04, 1.72)     | 0.77<br>(0.13, 2.41)  | 0.81<br>(0.13, 2.60)  | 1.11<br>(0.04, 4.35)   | 1.42<br>(0.01, 7.32)  | 0.84<br>(0.22, 2.24)  | 0.84<br>(0.24, 2.14)  | 1.08<br>(0.25, 3.03)   | 1.02<br>(0.37, 2.35)   |                        | 1.67<br>(0.28, 5.31)   | 1.65<br>(0.51, 4.51)      |
| EIBEC   | 0.53<br>(0.02, 2.10)  | 0.46<br>(0.03, 1.86)     | 0.70<br>(0.10, 2.23)  | 0.72<br>(0.09, 2.41)  | 1.14<br>(0.03, 4.32)   | 1.25<br>(0.01, 6.68)  | 0.74<br>(0.15, 2.10)  | 0.74<br>(0.16, 2.07)  | 0.96<br>(0.17, 2.82)   | 0.91<br>(0.24, 2.34)   | 1.14<br>(0.19, 3.58)   |                        | 1.66<br>(0.27, 5.56)      |
| LaMdDX  | 0.33<br>(0.02, 1.09)  | **0.31**<br>(0.03, 0.90) | 0.55<br>(0.09, 1.69)  | 0.58<br>(0.08, 1.84)  | 0.65<br>(0.03, 2.48)   | 1.01<br>(0.01, 5.36)  | 0.60<br>(0.14, 1.54)  | 0.60<br>(0.15, 1.49)  | 0.77<br>(0.16, 2.09)   | 0.74<br>(0.22, 1.65)   | 0.83<br>(0.22, 1.97)   | 1.19<br>(0.18, 3.75)   |                           |

**eFigure 24. Direct Evidence from the Pair Wise Comparisons for NDI at 18- 24 Months**

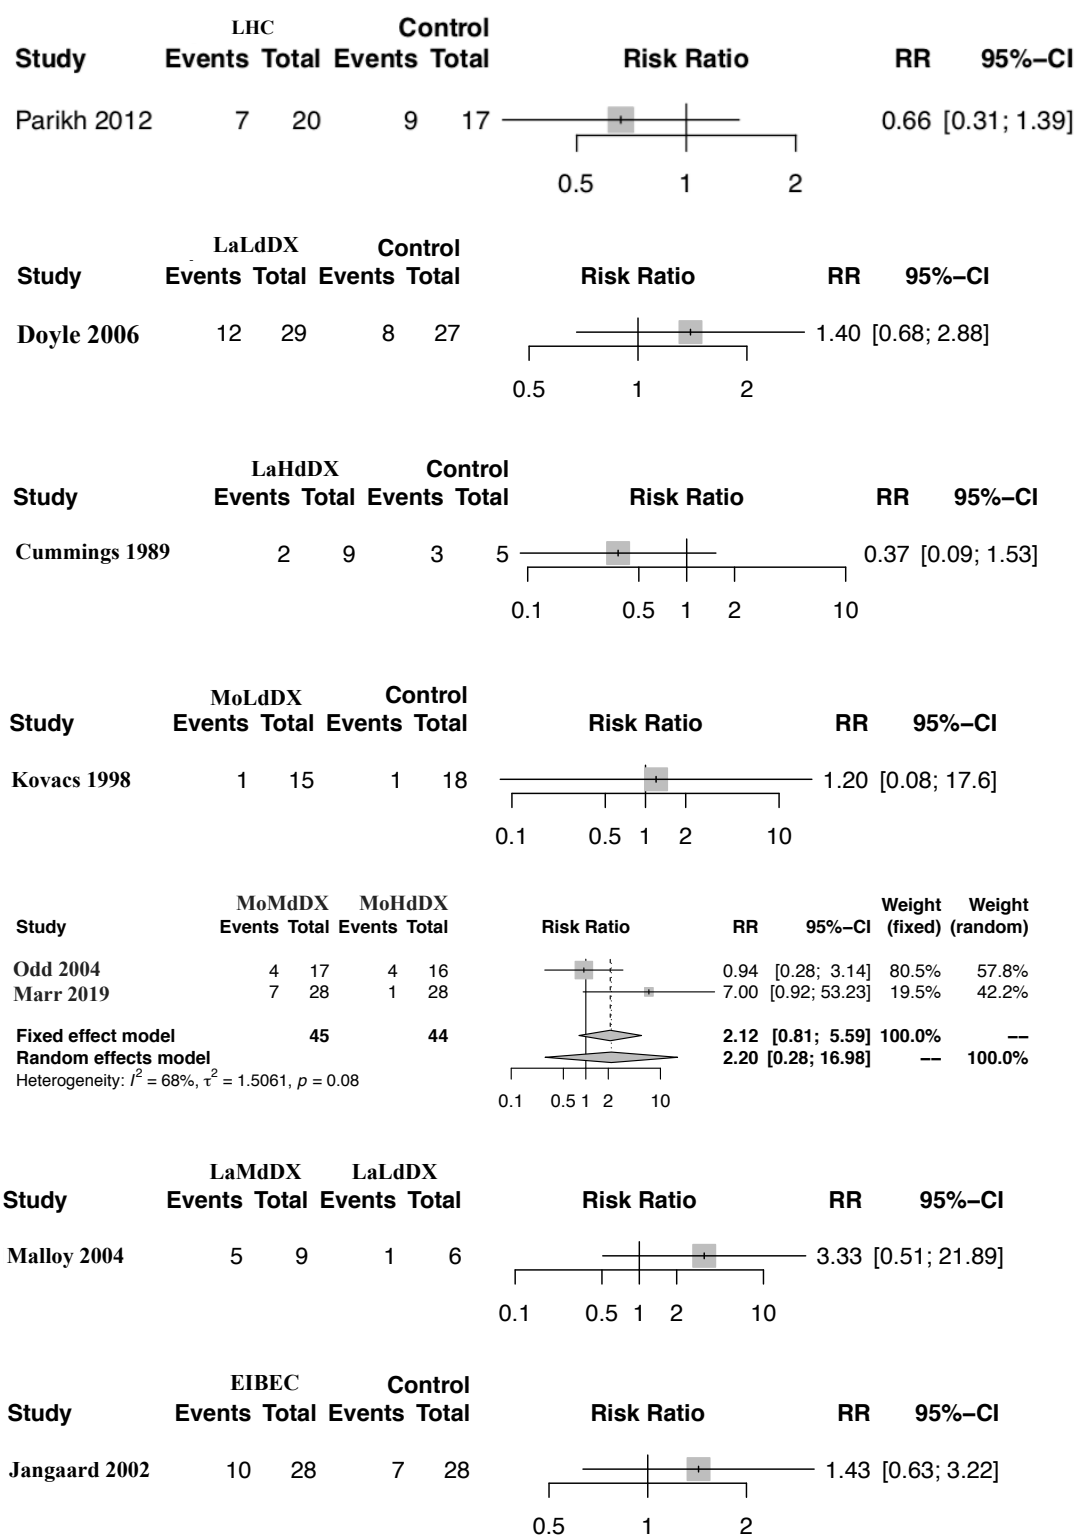

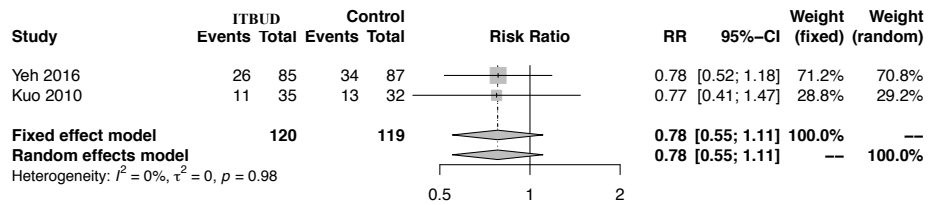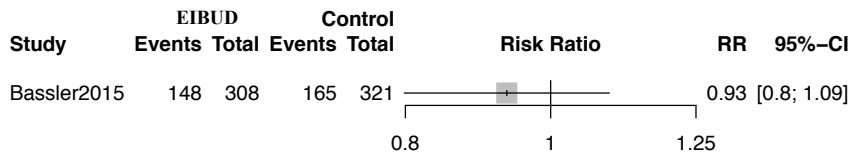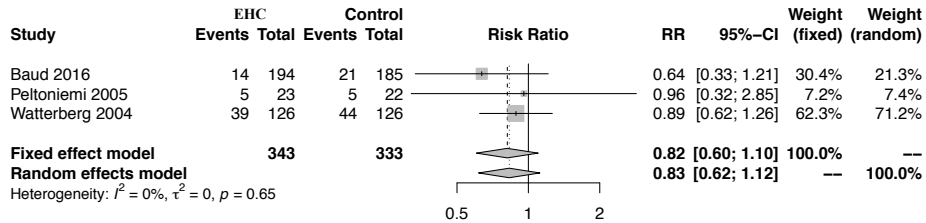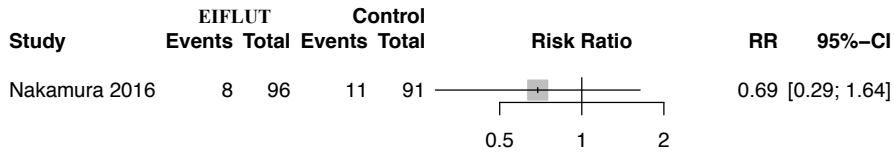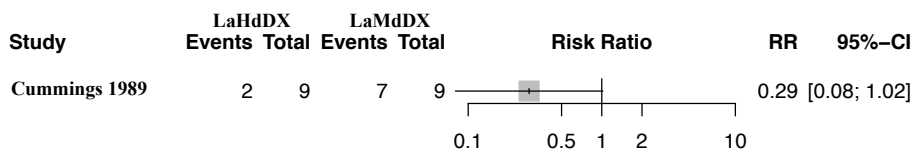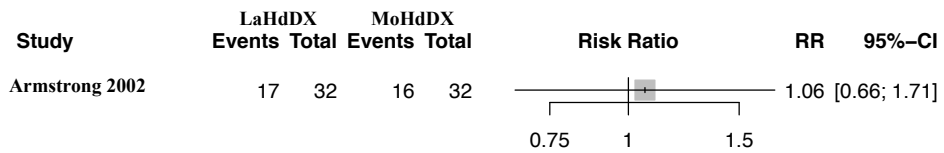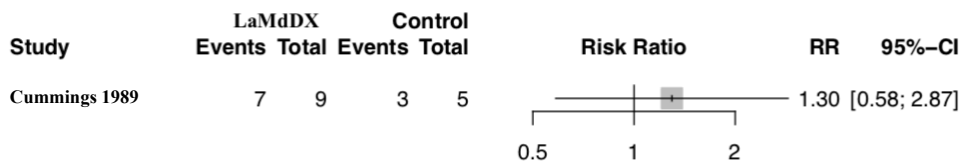

**eFigure 25. Split Between Direct and Indirect Evidence for NDI at 18-24 Months**

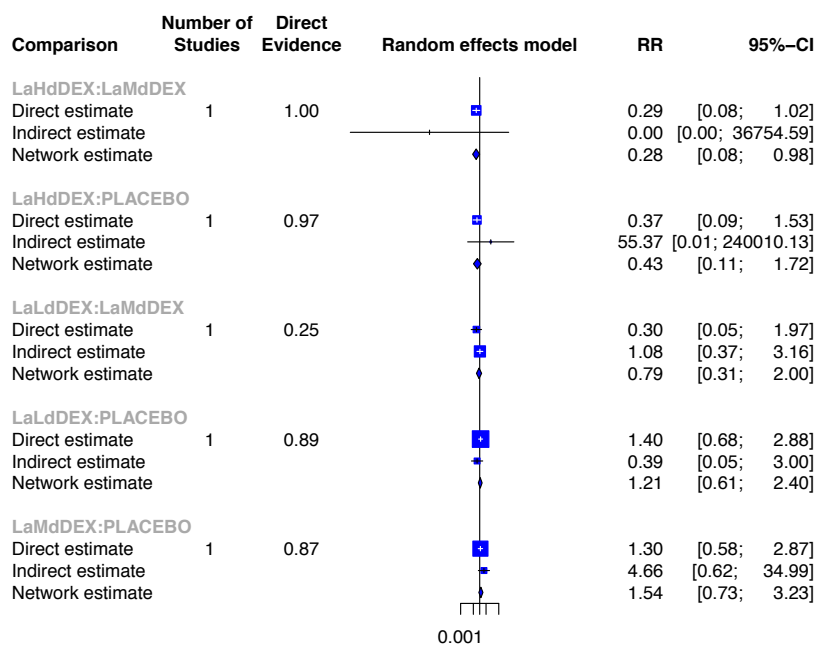



**eFigure 26. Network Plot (A), SUCRA Plot with SUCRA Values (%) (B), and Forest Plot Depicting the Network Estimates [RR (95% CrI)] of the Various Interventions with “Placebo” as the Common Comparator for GI Perforation (C)**

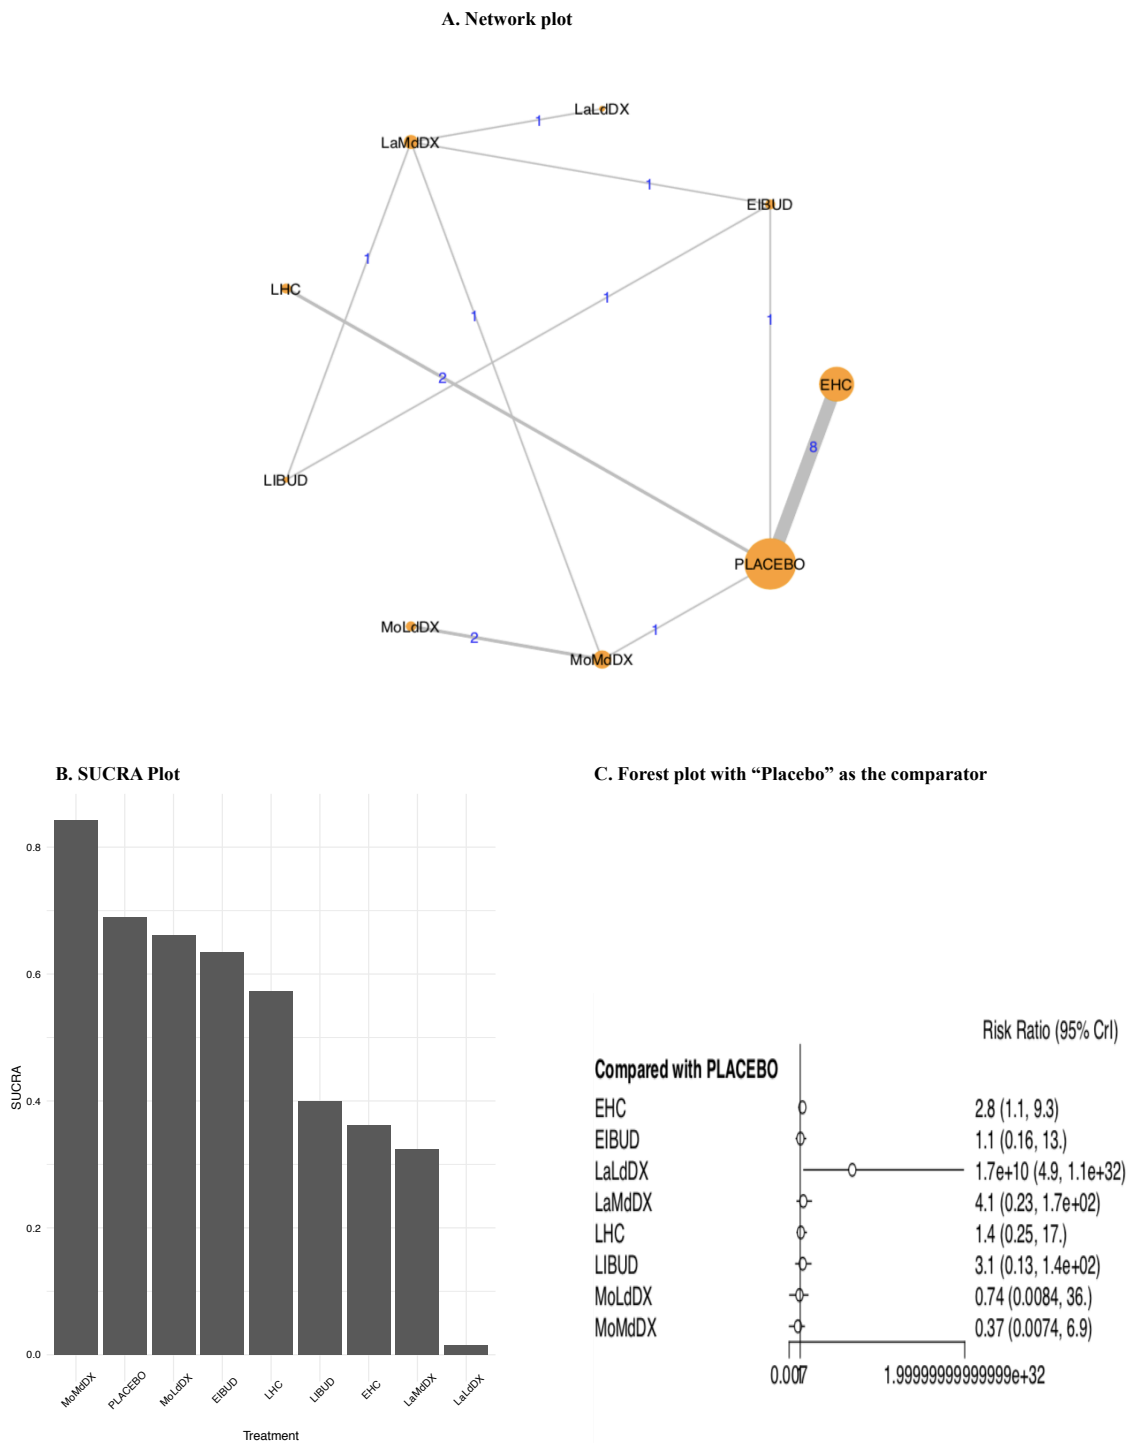

**eFigure 27. League Plot Depicting the Network Estimates [RR (95% CrI)] of Postnatal Corticosteroids Comparisons for GI Perforation**

|                          |                     |               |                      |                     |                      |                    |                    |                          |
|--------------------------|---------------------|---------------|----------------------|---------------------|----------------------|--------------------|--------------------|--------------------------|
| <b>EHC</b>               | 0.42 (0.04, 4.91)   | -             | 1.48 (0.06, 61.62)   | 0.49 (0.07, 6.61)   | 1.11 (0.03, 50)      | 0.26 (0, 12.93)    | 0.13 (0, 2.68)     | <b>0.36 (0.11, 0.92)</b> |
| 2.37 (0.2, 26.06)        | <b>EIBUD</b>        | -             | 3.51 (0.32, 66.73)   | 1.13 (0.08, 30.71)  | 2.67 (0.19, 54.13)   | 0.63 (0, 38)       | 0.31 (0, 7.99)     | 0.87 (0.08, 6.36)        |
| <b>0 (0, 0.6)</b>        | <b>0 (0, 0.22)</b>  | <b>LaLdDX</b> | <b>0 (0, 0.7)</b>    | <b>0 (0, 0.36)</b>  | <b>0 (0, 0.62)</b>   | <b>0 (0, 0.21)</b> | <b>0 (0, 0.09)</b> | <b>0 (0, 0.2)</b>        |
| 0.67 (0.02, 15.83)       | 0.28 (0.01, 3.08)   | -             | <b>LaMdDX</b>        | 0.33 (0.01, 15.72)  | 0.76 (0.05, 8.66)    | 0.17 (0, 12.35)    | 0.09 (0, 2.83)     | 0.24 (0.01, 4.34)        |
| 2.04 (0.15, 15.25)       | 0.88 (0.03, 12.48)  | -             | 3.03 (0.06, 141.42)  | <b>LHC</b>          | 2.32 (0.04, 109.24)  | 0.52 (0, 33.26)    | 0.25 (0, 7.48)     | 0.74 (0.06, 3.95)        |
| 0.9 (0.02, 29.2)         | 0.37 (0.02, 5.34)   | -             | 1.32 (0.12, 18.88)   | 0.43 (0.01, 27.51)  | <b>LIBUD</b>         | 0.23 (0, 23.86)    | 0.11 (0, 5.45)     | 0.32 (0.01, 7.83)        |
| 3.83 (0.08, 415.97)      | 1.6 (0.03, 221.29)  | -             | 5.76 (0.08, 1431.68) | 1.93 (0.03, 335.69) | 4.31 (0.04, 1129.73) | <b>MoLdDX</b>      | 0.49 (0.04, 4.68)  | 1.35 (0.03, 119.42)      |
| 7.76 (0.37, 472.58)      | 3.28 (0.13, 256.78) | -             | 11.69 (0.35, 1773.5) | 3.99 (0.13, 427.12) | 8.82 (0.18, 1456.59) | 2.05 (0.21, 27.66) | <b>MoMdDX</b>      | 2.73 (0.15, 134.37)      |
| <b>2.77 (1.09, 9.32)</b> | 1.15 (0.16, 12.97)  | -             | 4.1 (0.23, 173.03)   | 1.36 (0.25, 17.17)  | 3.12 (0.13, 139.92)  | 0.74 (0.01, 35.54) | 0.37 (0.01, 6.86)  | <b>PLACEBO</b>           |

# eFigure 28. Direct Evidence from the Pair Wise Comparisons for GI Perforation

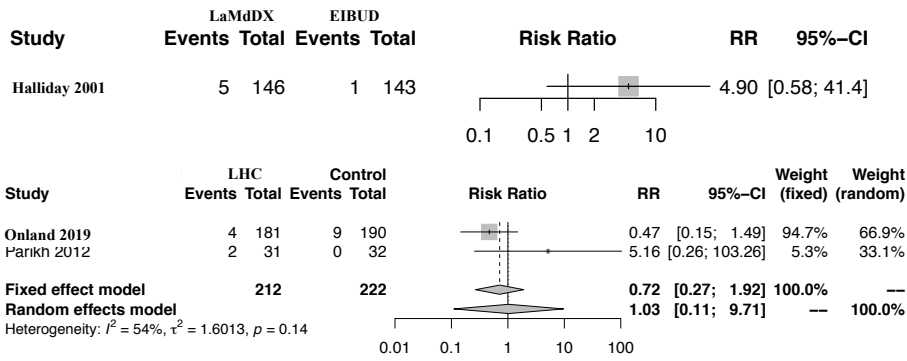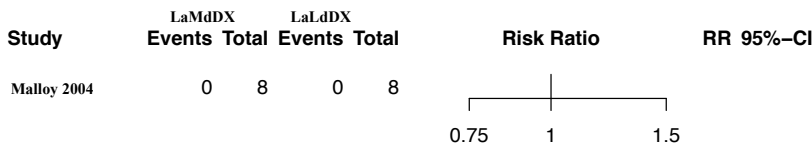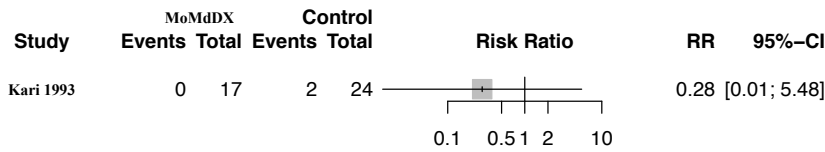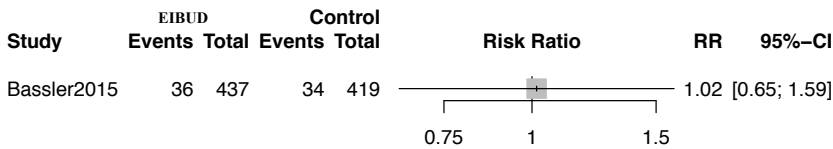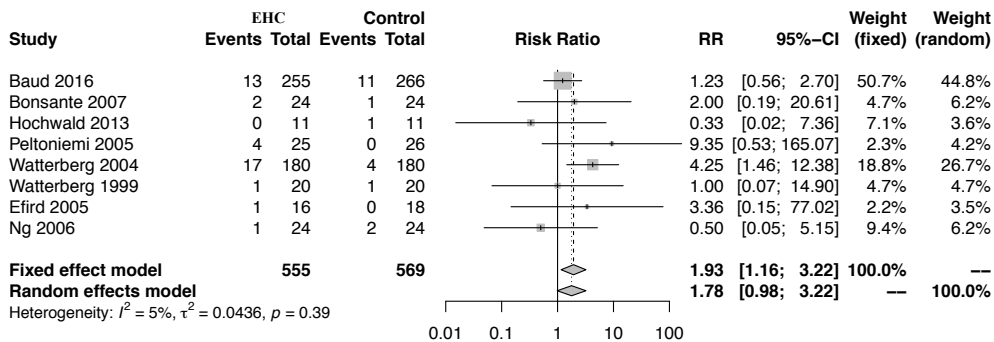

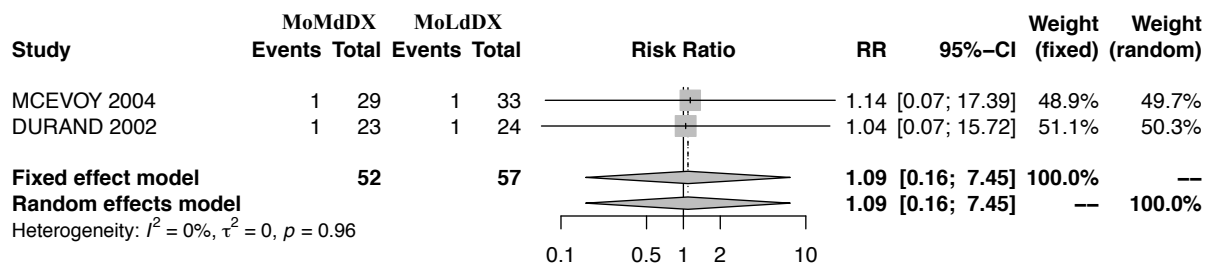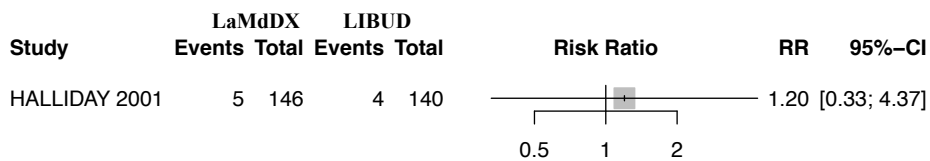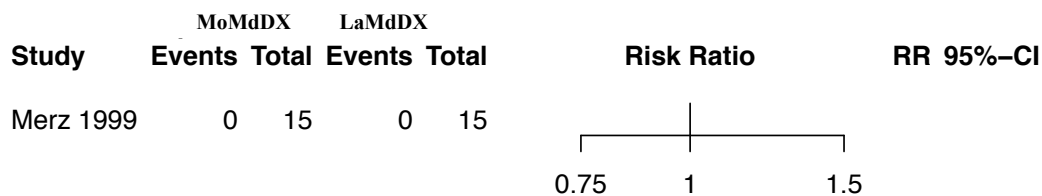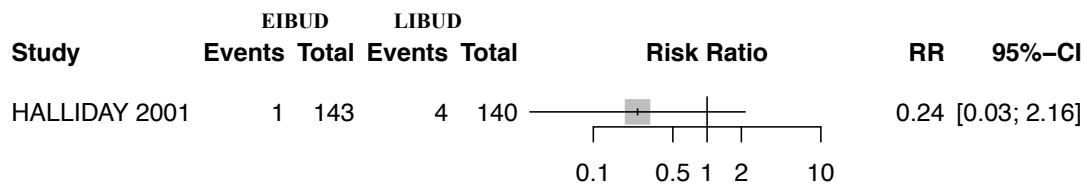

**eFigure 29. Split Between Direct and Indirect Evidence for GI Perforation**

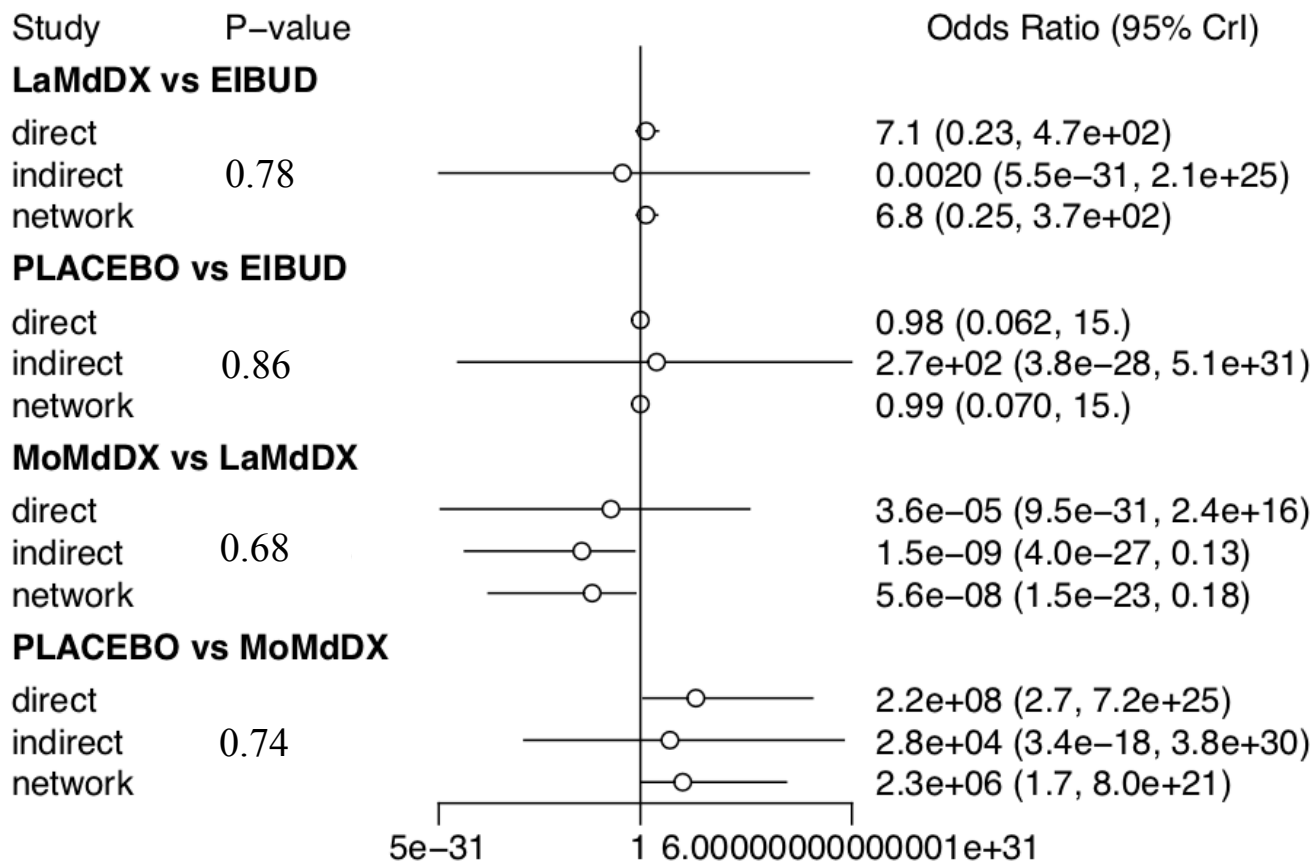

**eFigure 30. Network Plot (A), SUCRA Plot with SUCRA Values (%) (B), and Forest Plot Depicting the Network Estimates [RR (95% CrI)] of the Various Interventions with “Placebo” as the Common Comparator for Hypertrophic Cardiomyopathy (C)**

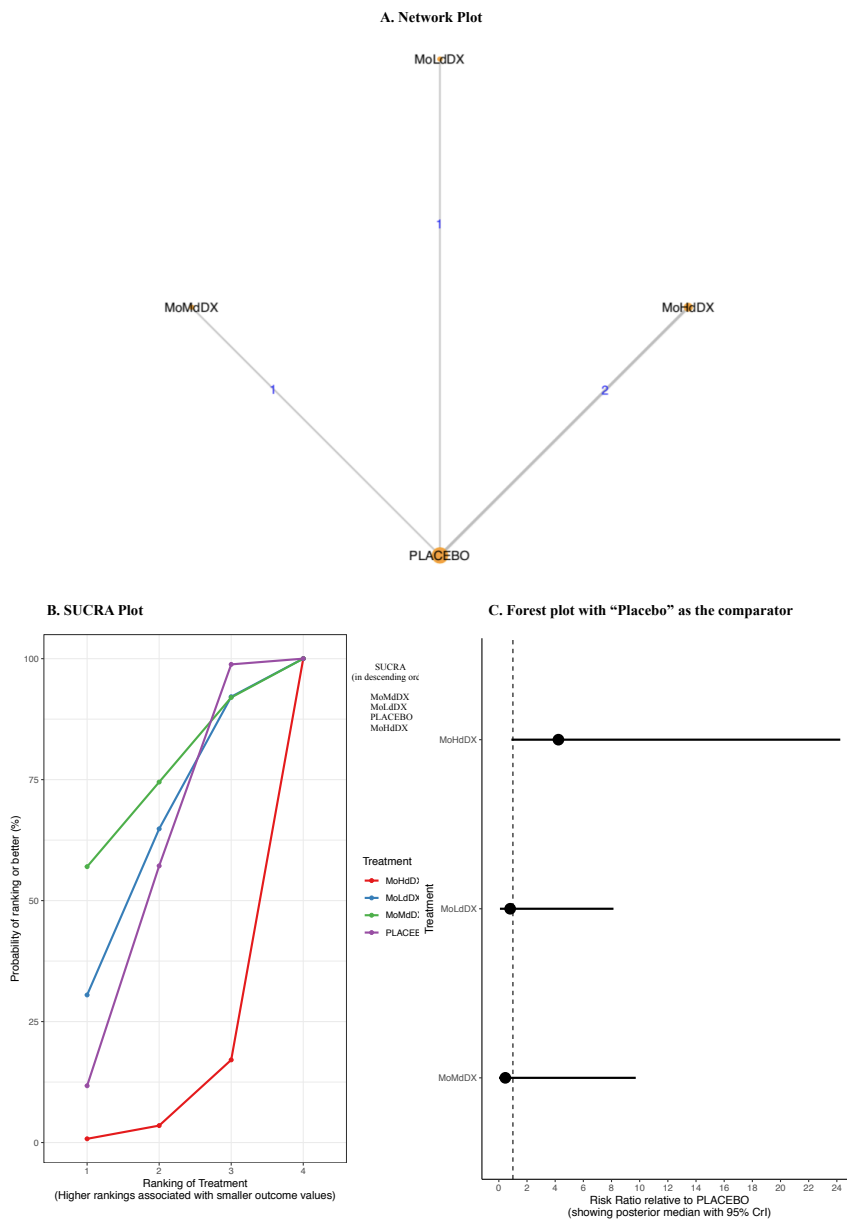

**eFigure 31. League Plot Depicting the Network Estimates [RR (95% CrI)] of Postnatal Corticosteroids Comparisons for Hypertrophic Cardiomyopathy**

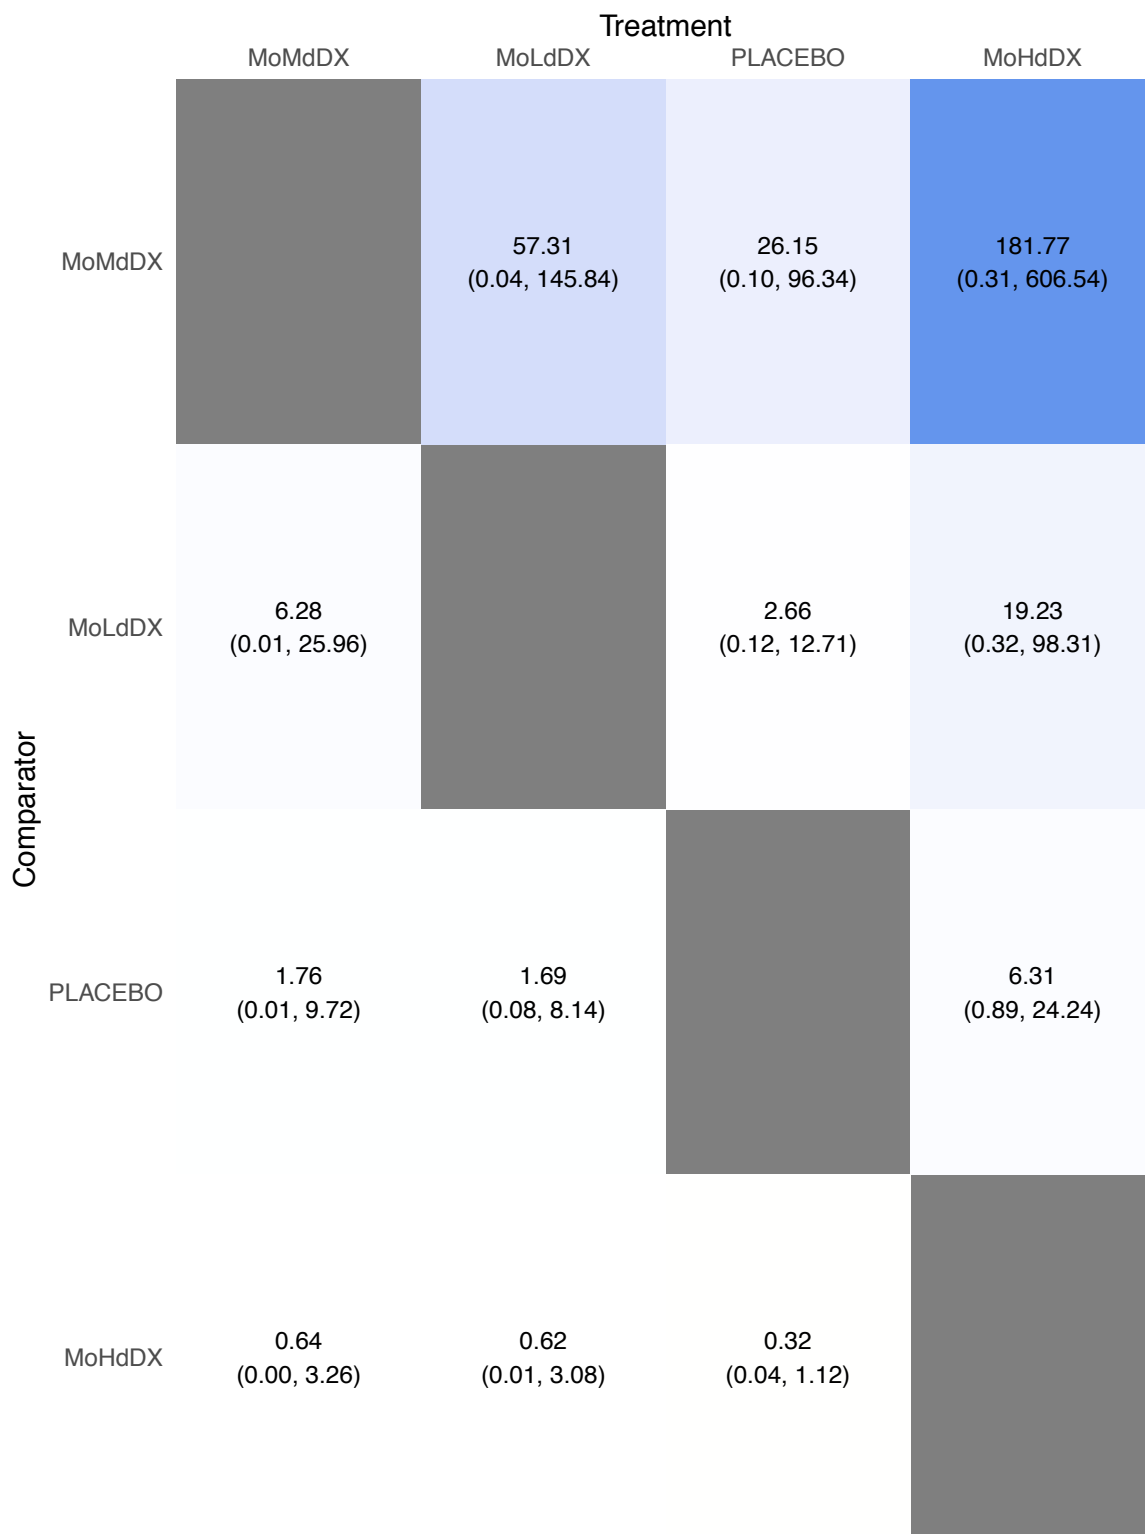

**eFigure 32. Direct Evidence from the Pair Wise Comparisons for Hypertrophic Cardiomyopathy**

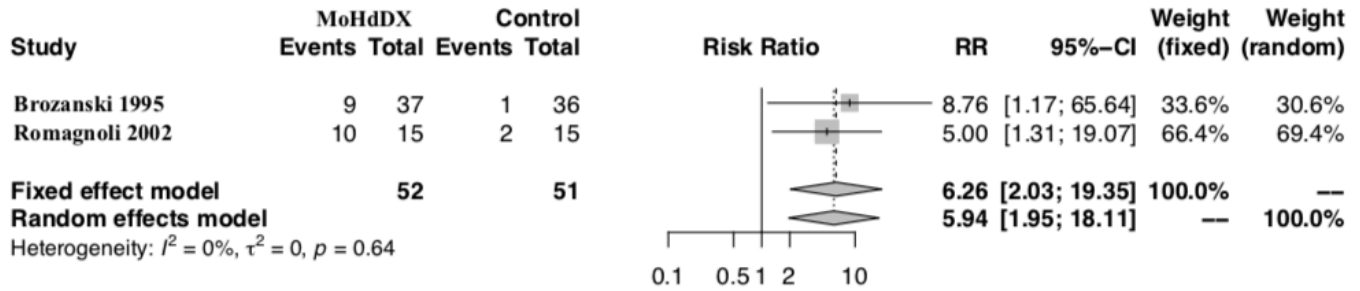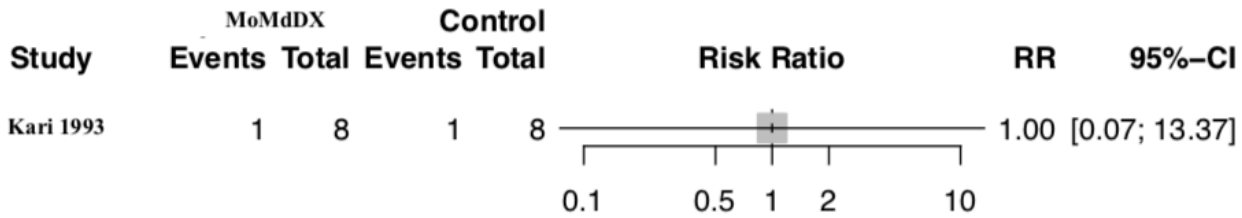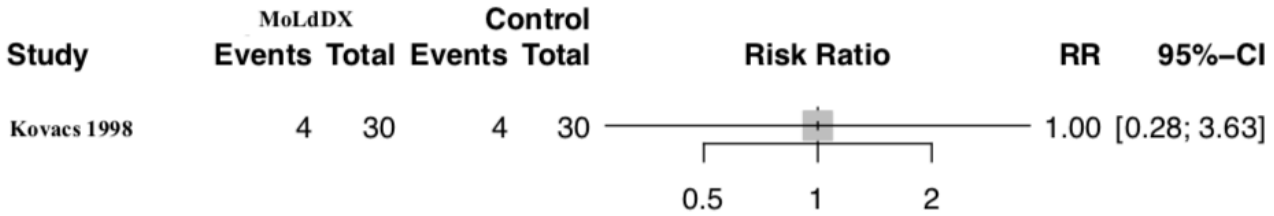



**eFigure 33. Network Plot (A), SUCRA Plot with SUCRA Values (%) (B), and Forest Plot Depicting the Network Estimates [RR (95% CrI)] of the Various Interventions with “Placebo” as the Common Comparator for Hypertension (C)**

**A. Network Plot**

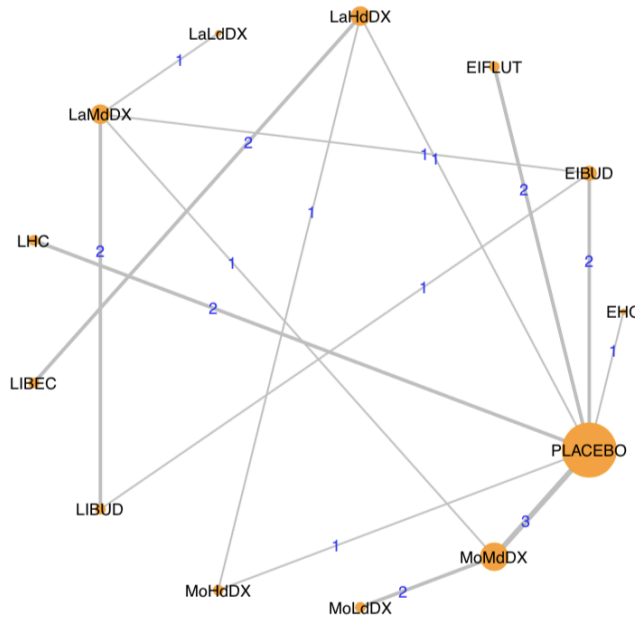

**B. SUCRA Plot**

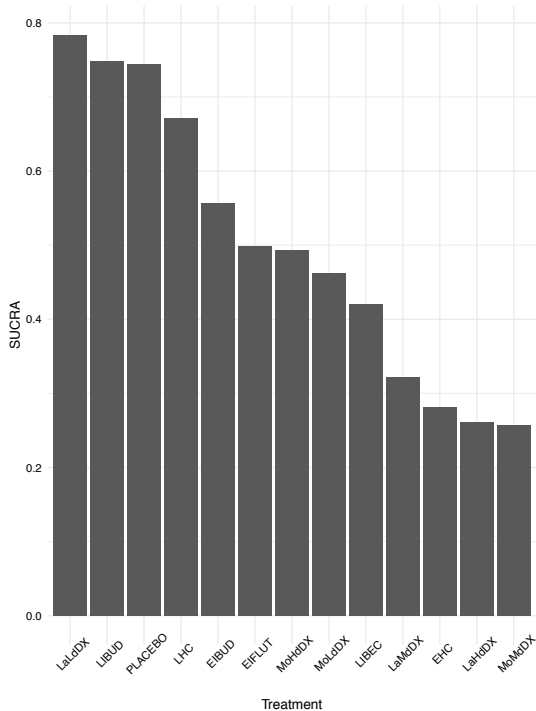

**C. Forest plot with “Placebo” as the comparator**

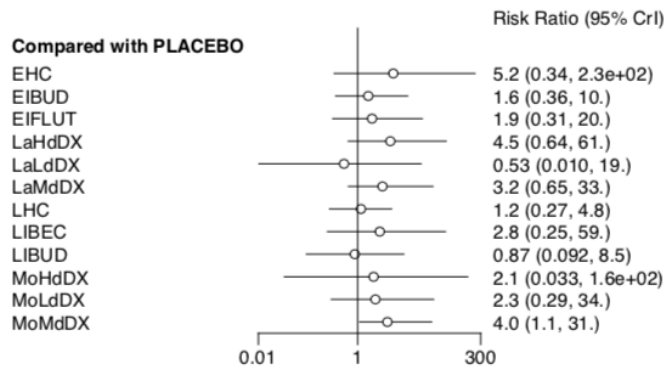

**eFigure 34. League Plot Depicting the Network Estimates [RR (95% CrI)] of Postnatal Corticosteroids Comparisons for Hypertension**

|                         |                        |                        |                        |                       |                        |                        |                        |                       |                         |                        |                          |                       |
|-------------------------|------------------------|------------------------|------------------------|-----------------------|------------------------|------------------------|------------------------|-----------------------|-------------------------|------------------------|--------------------------|-----------------------|
| <b>EHC</b>              | 0.31<br>(0.01, 8.96)   | 0.37<br>(0.01, 13.72)  | 0.87<br>(0.01, 40.85)  | 0.09 (0, 9.57)        | 0.62<br>(0.01, 24.35)  | 0.22 (0, 4.67)         | 0.52<br>(0.01, 34.45)  | 0.16 (0, 5.9)         | 0.37 (0, 70.47)         | 0.43<br>(0.01, 21.61)  | 0.78<br>(0.02, 26.32)    | 0.19 (0, 2.98)        |
| 3.21<br>(0.11, 180.1)   | <b>EIBUD</b>           | 1.18<br>(0.1, 18.23)   | 2.73<br>(0.2, 54.06)   | 0.32<br>(0.01, 8.54)  | 1.93<br>(0.46, 12.85)  | 0.71<br>(0.07, 5.42)   | 1.68<br>(0.08, 48.02)  | 0.53<br>(0.07, 3)     | 1.25<br>(0.01, 119.63)  | 1.37<br>(0.14, 22.4)   | 2.36<br>(0.46, 21.79)    | 0.61<br>(0.1, 2.79)   |
| 2.7<br>(0.07, 166.1)    | 0.85<br>(0.05, 10.52)  | <b>EIFLUT</b>          | 2.34<br>(0.12, 52.41)  | 0.26 (0, 13.4)        | 1.65<br>(0.11, 28.72)  | 0.6<br>(0.03, 5.5)     | 1.44<br>(0.05, 46.53)  | 0.45<br>(0.02, 7.39)  | 1.05<br>(0.01, 111.51)  | 1.16<br>(0.06, 28.1)   | 2.05<br>(0.17, 31.52)    | 0.52<br>(0.05, 3.19)  |
| 1.16<br>(0.02, 79.34)   | 0.37<br>(0.02, 5.03)   | 0.43<br>(0.02, 8.22)   | <b>LaHdDX</b>          | 0.11 (0, 6.11)        | 0.72<br>(0.04, 14.29)  | 0.26<br>(0.01, 2.65)   | 0.61<br>(0.14, 2.95)   | 0.19<br>(0.01, 3.66)  | 0.46<br>(0.01, 27.76)   | 0.5<br>(0.02, 13.33)   | 0.88<br>(0.06, 14.8)     | 0.22<br>(0.02, 1.56)  |
| 10.87<br>(0.1, 2200.76) | 3.11<br>(0.12, 154.13) | 3.8<br>(0.07, 332.3)   | 8.97<br>(0.16, 936.68) | <b>LaLdDX</b>         | 6.06<br>(0.45, 249.79) | 2.22<br>(0.04, 135.63) | 5.58<br>(0.08, 732.01) | 1.65<br>(0.05, 81.59) | 4.16<br>(0.02, 1192.65) | 4.4<br>(0.13, 343.1)   | 7.59<br>(0.35, 448.9)    | 1.89<br>(0.05, 97.56) |
| 1.62<br>(0.04, 92.64)   | 0.52<br>(0.08, 2.2)    | 0.6<br>(0.03, 9.28)    | 1.4<br>(0.07, 26.73)   | 0.16 (0, 2.24)        | <b>LaMdDX</b>          | 0.37<br>(0.02, 2.76)   | 0.86<br>(0.03, 23.32)  | 0.28<br>(0.03, 1.1)   | 0.62<br>(0.01, 59.5)    | 0.7<br>(0.07, 7.7)     | 1.21<br>(0.24, 7.26)     | 0.32<br>(0.03, 1.54)  |
| 4.6<br>(0.21, 247.13)   | 1.41<br>(0.18, 15.32)  | 1.66<br>(0.18, 29.12)  | 3.89<br>(0.38, 78.38)  | 0.45<br>(0.01, 23.14) | 2.71<br>(0.36, 47.23)  | <b>LHC</b>             | 2.42<br>(0.15, 74.05)  | 0.75<br>(0.05, 11.45) | 1.81<br>(0.02, 174.14)  | 1.94<br>(0.18, 46.46)  | 3.37<br>(0.59, 46.95)    | 0.86<br>(0.21, 3.7)   |
| 1.91<br>(0.03, 149.44)  | 0.59<br>(0.02, 11.83)  | 0.69<br>(0.02, 18.64)  | 1.63<br>(0.34, 7.38)   | 0.18 (0, 12.89)       | 1.16<br>(0.04, 32.77)  | 0.41<br>(0.01, 6.52)   | <b>LIBEC</b>           | 0.31<br>(0.01, 8.18)  | 0.74<br>(0.01, 54.84)   | 0.81<br>(0.02, 29.1)   | 1.42<br>(0.07, 35.02)    | 0.36<br>(0.02, 4.06)  |
| 6.18<br>(0.17, 467.5)   | 1.87<br>(0.33, 14.53)  | 2.21<br>(0.14, 60.96)  | 5.25<br>(0.27, 170.71) | 0.61<br>(0.01, 18.94) | 3.63<br>(0.91, 31.85)  | 1.32<br>(0.09, 18.41)  | 3.25<br>(0.12, 145.89) | <b>LIBUD</b>          | 2.4<br>(0.02, 308.87)   | 2.57<br>(0.22, 62.28)  | 4.45<br>(0.69, 66.32)    | 1.15<br>(0.12, 10.84) |
| 2.69<br>(0.01, 648.32)  | 0.8<br>(0.01, 76.21)   | 0.95<br>(0.01, 107.91) | 2.15<br>(0.04, 185.61) | 0.24 (0, 60.1)        | 1.61<br>(0.02, 184.57) | 0.55<br>(0.01, 44.67)  | 1.35<br>(0.02, 145.49) | 0.42 (0, 46.21)       | <b>MoHdDX</b>           | 1.13<br>(0.01, 161.07) | 1.98<br>(0.02, 207.55)   | 0.48<br>(0.01, 30.15) |
| 2.34<br>(0.05, 153.11)  | 0.73<br>(0.04, 7.38)   | 0.86<br>(0.04, 16.84)  | 2.01<br>(0.08, 47.66)  | 0.23 (0, 7.83)        | 1.43<br>(0.13, 14.64)  | 0.52<br>(0.02, 5.58)   | 1.24<br>(0.03, 40.16)  | 0.39<br>(0.02, 4.6)   | 0.89<br>(0.01, 96.73)   | <b>MoLdDX</b>          | 1.74<br>(0.34, 9.91)     | 0.44<br>(0.03, 3.41)  |
| 1.29<br>(0.04, 66.42)   | 0.42<br>(0.05, 2.18)   | 0.49<br>(0.03, 5.73)   | 1.14<br>(0.07, 16.77)  | 0.13 (0, 2.82)        | 0.83<br>(0.14, 4.17)   | 0.3<br>(0.02, 1.68)    | 0.7<br>(0.03, 15.38)   | 0.22<br>(0.02, 1.44)  | 0.5 (0, 44.43)          | 0.57<br>(0.1, 2.93)    | <b>MoMdDX</b>            | 0.25<br>(0.03, 0.91)  |
| 5.2<br>(0.34, 230.2)    | 1.63<br>(0.36, 10.17)  | 1.94<br>(0.31, 20.03)  | 4.54<br>(0.64, 60.54)  | 0.53<br>(0.01, 18.94) | 3.15<br>(0.65, 32.97)  | 1.16<br>(0.27, 4.83)   | 2.78<br>(0.25, 58.54)  | 0.87<br>(0.09, 8.51)  | 2.09<br>(0.03, 164.71)  | 2.27<br>(0.29, 33.89)  | <b>3.96 (1.1, 30.91)</b> | <b>PLACEBO</b>        |

# eFigure 35. Direct Evidence from the Pair Wise Comparisons for Hypertension

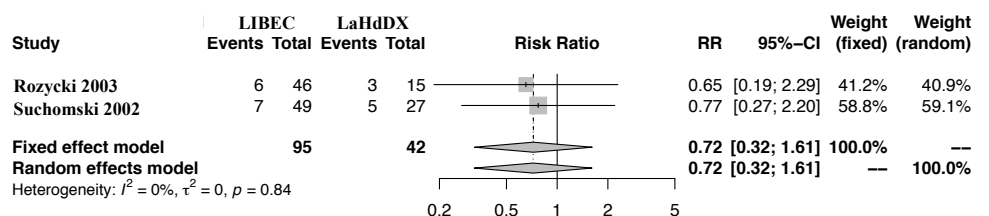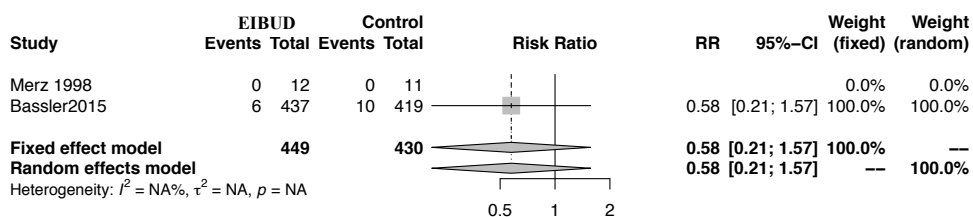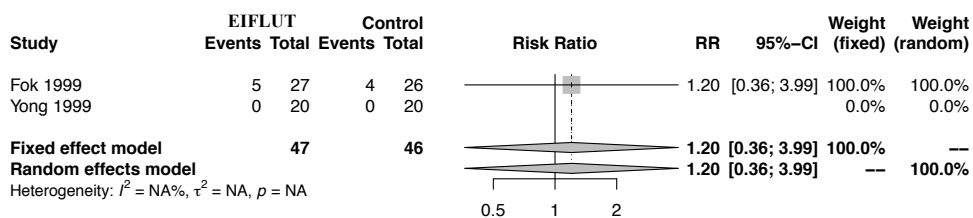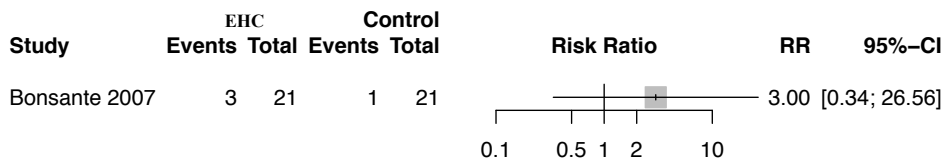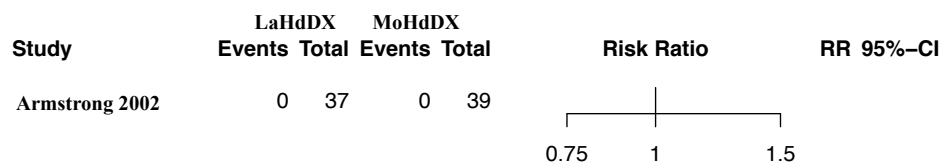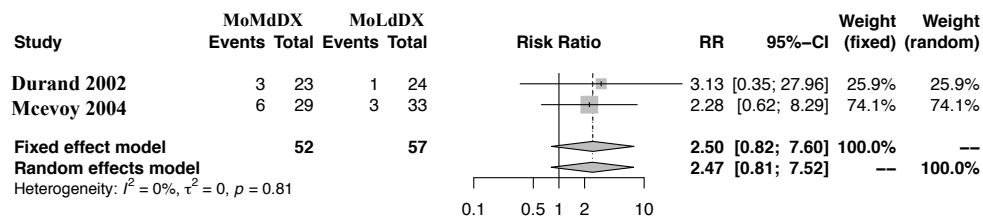

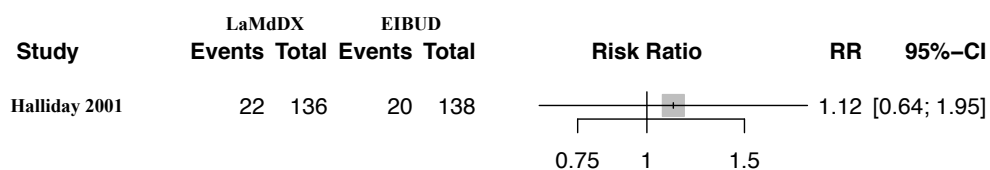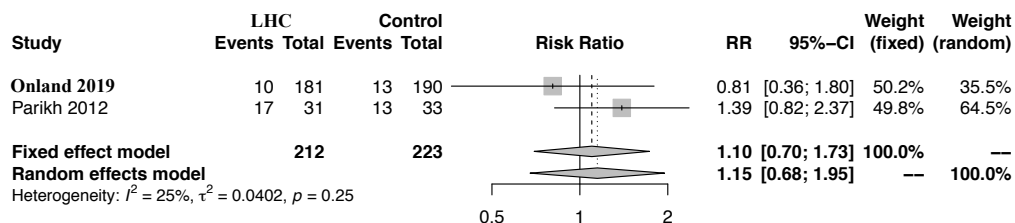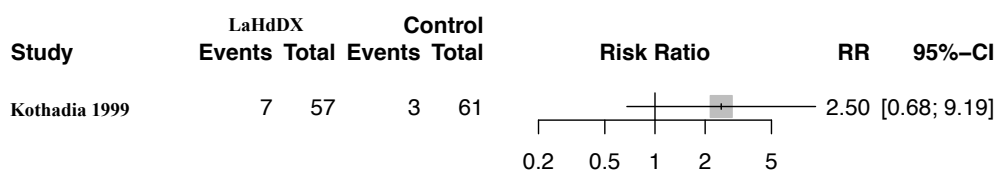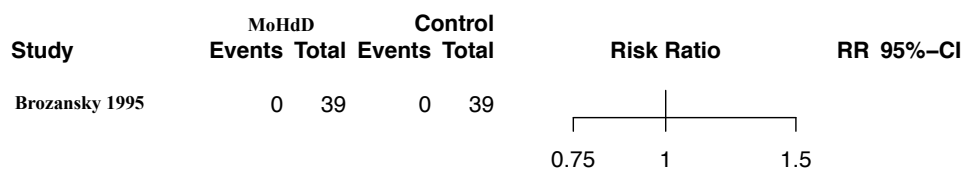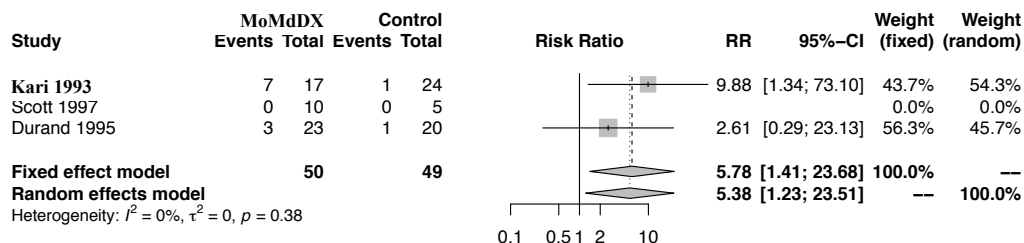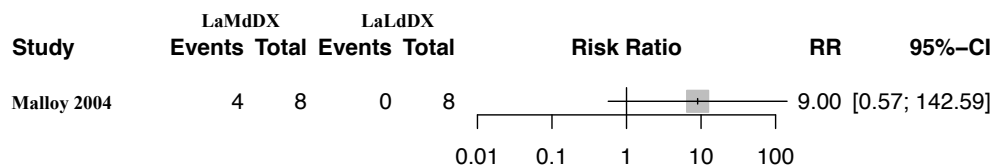

**eFigure 36. Split Between Direct and Indirect Evidence for Hypertension**

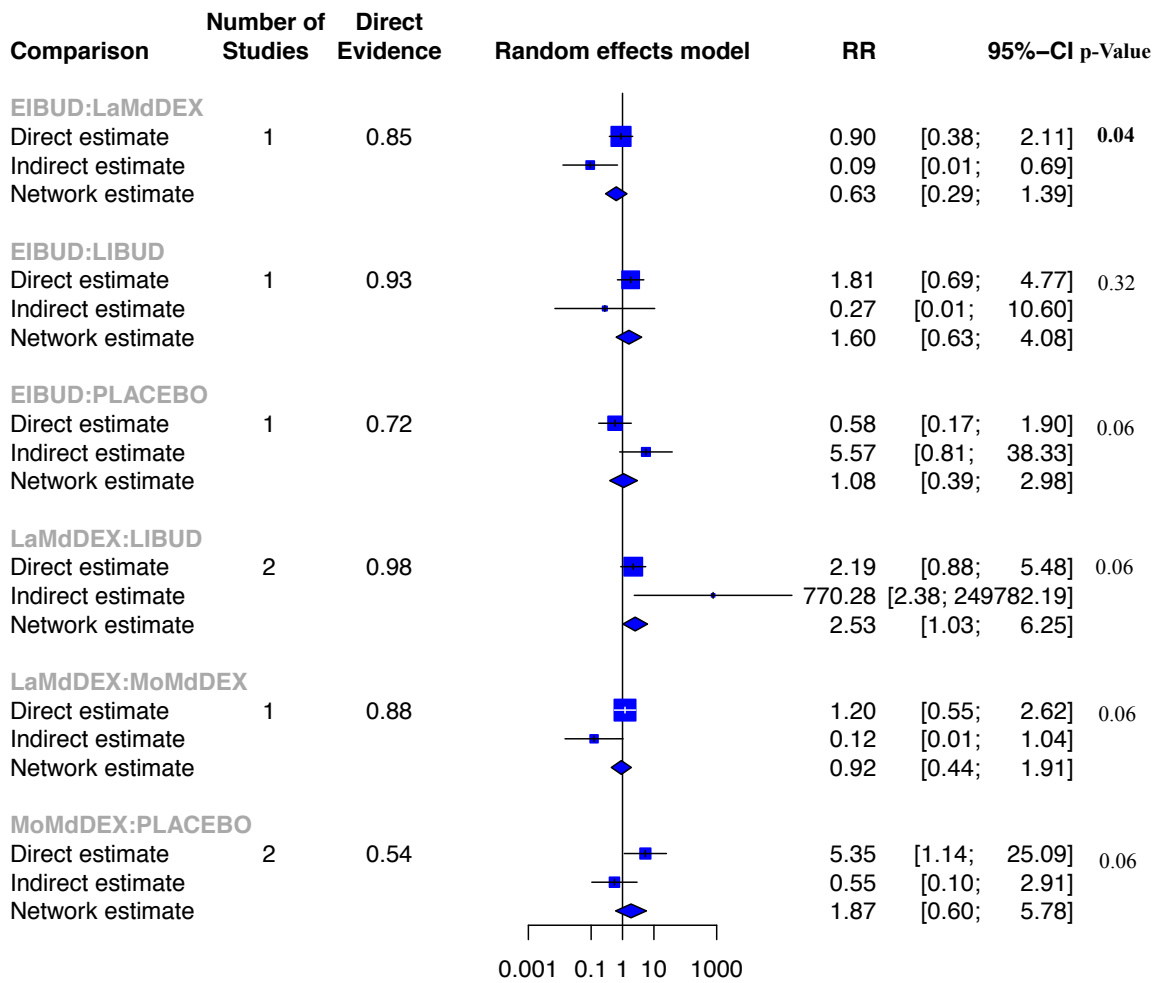

**eFigure 37. Network Plot (A), SUCRA Plot with SUCRA Values (%) (B), and Forest Plot Depicting the Network Estimates [RR (95% CrI)] of the Various Interventions with “Placebo” as the Common Comparator for Sepsis (C)**

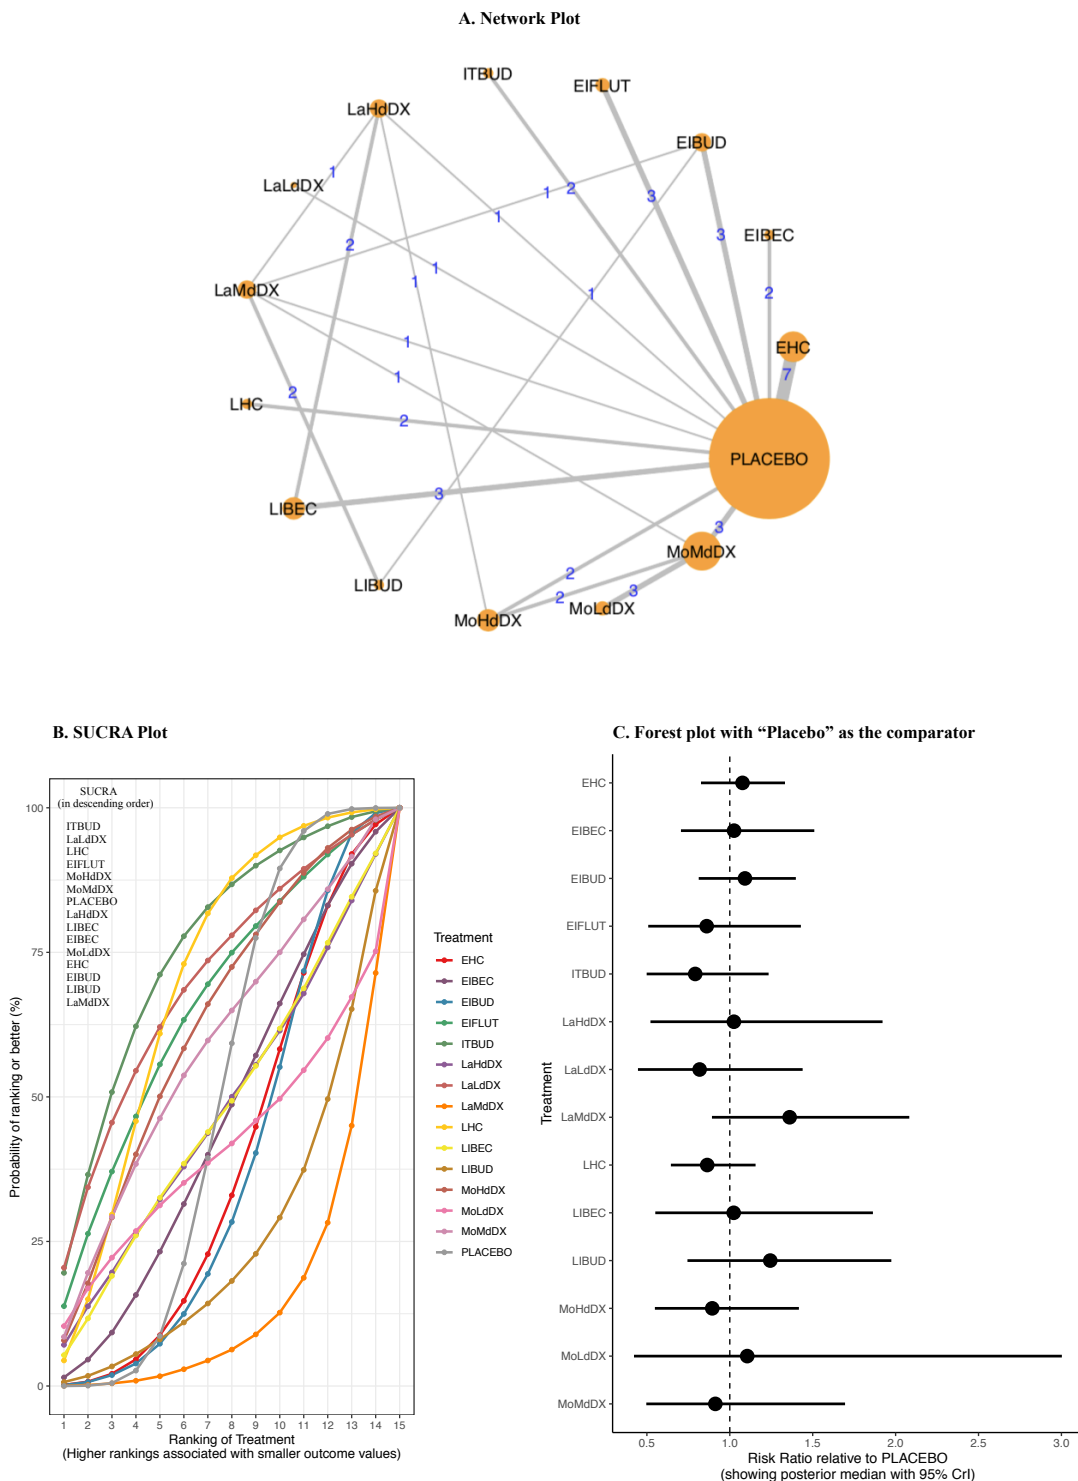

**eFigure 38. League Plot Depicting the Network Estimates [RR (95% CrI)] of Postnatal Corticosteroids Comparisons for Sepsis**

| Comparator | Treatment            |                      |                      |                      |                      |                      |                      |                      |                      |                      |                      |                      |                      |                      |                      |
|------------|----------------------|----------------------|----------------------|----------------------|----------------------|----------------------|----------------------|----------------------|----------------------|----------------------|----------------------|----------------------|----------------------|----------------------|----------------------|
|            | ITBUD                | LaLdDX               | LHC                  | EIFLUT               | MoHdDX               | MoMdDX               | PLACEBO              | LaHdDX               | LIBEC                | EIBEC                | MoLdDX               | EHC                  | EIBUD                | LIBUD                | LaMdDX               |
| ITBUD      |                      | 1.11<br>(0.49, 2.14) | 1.13<br>(0.64, 1.87) | 1.15<br>(0.55, 2.15) | 1.19<br>(0.58, 2.18) | 1.26<br>(0.53, 2.52) | 1.30<br>(0.81, 2.01) | 1.39<br>(0.58, 2.80) | 1.39<br>(0.61, 2.71) | 1.36<br>(0.73, 2.35) | 1.64<br>(0.47, 4.24) | 1.40<br>(0.80, 2.23) | 1.42<br>(0.80, 2.31) | 1.65<br>(0.79, 2.98) | 1.81<br>(0.92, 3.21) |
| LaLdDX     | 1.04<br>(0.47, 2.04) |                      | 1.12<br>(0.56, 2.07) | 1.14<br>(0.49, 2.28) | 1.18<br>(0.52, 2.34) | 1.24<br>(0.48, 2.64) | 1.28<br>(0.69, 2.24) | 1.38<br>(0.53, 3.04) | 1.37<br>(0.55, 2.95) | 1.34<br>(0.64, 2.55) | 1.61<br>(0.45, 4.22) | 1.38<br>(0.70, 2.52) | 1.40<br>(0.70, 2.56) | 1.63<br>(0.71, 3.22) | 1.78<br>(0.83, 3.48) |
| LHC        | 0.95<br>(0.54, 1.56) | 1.00<br>(0.48, 1.79) |                      | 1.04<br>(0.54, 1.78) | 1.07<br>(0.59, 1.78) | 1.13<br>(0.54, 2.09) | 1.17<br>(0.87, 1.55) | 1.25<br>(0.57, 2.36) | 1.25<br>(0.60, 2.31) | 1.22<br>(0.74, 1.93) | 1.48<br>(0.47, 3.64) | 1.26<br>(0.83, 1.77) | 1.28<br>(0.83, 1.84) | 1.49<br>(0.79, 2.46) | 1.63<br>(0.94, 2.63) |
| EIFLUT     | 0.98<br>(0.46, 1.82) | 1.03<br>(0.44, 2.04) | 1.05<br>(0.56, 1.84) |                      | 1.11<br>(0.51, 2.11) | 1.17<br>(0.49, 2.38) | 1.21<br>(0.70, 1.97) | 1.29<br>(0.52, 2.71) | 1.29<br>(0.54, 2.64) | 1.26<br>(0.64, 2.25) | 1.52<br>(0.44, 3.99) | 1.30<br>(0.70, 2.19) | 1.32<br>(0.71, 2.26) | 1.54<br>(0.71, 2.88) | 1.68<br>(0.83, 3.11) |
| MoHdDX     | 0.94<br>(0.46, 1.73) | 0.99<br>(0.43, 1.94) | 1.01<br>(0.56, 1.70) | 1.03<br>(0.47, 1.97) |                      | 1.08<br>(0.56, 1.91) | 1.16<br>(0.71, 1.82) | 1.23<br>(0.52, 2.46) | 1.23<br>(0.53, 2.43) | 1.21<br>(0.64, 2.14) | 1.41<br>(0.47, 3.33) | 1.25<br>(0.71, 2.04) | 1.26<br>(0.72, 2.10) | 1.47<br>(0.71, 2.71) | 1.61<br>(0.82, 2.90) |
| MoMdDX     | 0.93<br>(0.40, 1.89) | 0.97<br>(0.38, 2.08) | 1.00<br>(0.48, 1.84) | 1.01<br>(0.42, 2.05) | 1.02<br>(0.52, 1.77) |                      | 1.14<br>(0.59, 2.01) | 1.22<br>(0.46, 2.61) | 1.22<br>(0.48, 2.58) | 1.19<br>(0.54, 2.30) | 1.30<br>(0.57, 2.59) | 1.23<br>(0.60, 2.22) | 1.25<br>(0.61, 2.24) | 1.44<br>(0.62, 2.79) | 1.58<br>(0.73, 3.01) |
| PLACEBO    | 0.81<br>(0.50, 1.23) | 0.85<br>(0.45, 1.44) | 0.87<br>(0.64, 1.16) | 0.89<br>(0.51, 1.43) | 0.92<br>(0.55, 1.42) | 0.97<br>(0.50, 1.70) |                      | 1.07<br>(0.52, 1.92) | 1.07<br>(0.55, 1.86) | 1.05<br>(0.71, 1.51) | 1.26<br>(0.42, 3.00) | 1.08<br>(0.83, 1.33) | 1.09<br>(0.81, 1.40) | 1.27<br>(0.74, 1.97) | 1.39<br>(0.89, 2.08) |
| LaHdDX     | 0.84<br>(0.36, 1.73) | 0.89<br>(0.33, 1.90) | 0.91<br>(0.42, 1.76) | 0.92<br>(0.37, 1.92) | 0.95<br>(0.41, 1.93) | 1.00<br>(0.38, 2.18) | 1.04<br>(0.52, 1.92) |                      | 1.06<br>(0.54, 1.95) | 1.09<br>(0.48, 2.19) | 1.30<br>(0.35, 3.45) | 1.12<br>(0.53, 2.11) | 1.13<br>(0.54, 2.13) | 1.31<br>(0.57, 2.57) | 1.43<br>(0.67, 2.71) |
| LIBEC      | 0.83<br>(0.37, 1.65) | 0.88<br>(0.34, 1.83) | 0.90<br>(0.43, 1.66) | 0.91<br>(0.38, 1.85) | 0.94<br>(0.41, 1.87) | 0.99<br>(0.39, 2.09) | 1.03<br>(0.54, 1.82) | 1.05<br>(0.51, 1.85) |                      | 1.07<br>(0.49, 2.07) | 1.28<br>(0.35, 3.21) | 1.11<br>(0.55, 2.03) | 1.12<br>(0.55, 2.04) | 1.30<br>(0.56, 2.53) | 1.42<br>(0.65, 2.69) |
| EIBEC      | 0.81<br>(0.42, 1.37) | 0.84<br>(0.39, 1.56) | 0.87<br>(0.52, 1.35) | 0.88<br>(0.44, 1.55) | 0.91<br>(0.47, 1.57) | 0.96<br>(0.43, 1.84) | 0.99<br>(0.66, 1.42) | 1.06<br>(0.46, 2.07) | 1.06<br>(0.48, 2.03) |                      | 1.25<br>(0.38, 3.06) | 1.07<br>(0.65, 1.59) | 1.09<br>(0.65, 1.66) | 1.26<br>(0.63, 2.19) | 1.38<br>(0.75, 2.35) |
| MoLdDX     | 0.83<br>(0.24, 2.11) | 0.86<br>(0.24, 2.24) | 0.89<br>(0.27, 2.15) | 0.90<br>(0.25, 2.27) | 0.91<br>(0.30, 2.12) | 0.89<br>(0.39, 1.76) | 1.02<br>(0.33, 2.37) | 1.08<br>(0.29, 2.88) | 1.08<br>(0.31, 2.90) | 1.06<br>(0.33, 2.62) |                      | 1.10<br>(0.34, 2.58) | 1.11<br>(0.35, 2.65) | 1.28<br>(0.37, 3.18) | 1.40<br>(0.43, 3.42) |
| EHC        | 0.76<br>(0.45, 1.25) | 0.80<br>(0.40, 1.43) | 0.82<br>(0.57, 1.21) | 0.84<br>(0.46, 1.42) | 0.86<br>(0.49, 1.42) | 0.91<br>(0.45, 1.67) | 0.94<br>(0.75, 1.21) | 1.01<br>(0.47, 1.89) | 1.01<br>(0.49, 1.83) | 0.98<br>(0.63, 1.54) | 1.19<br>(0.39, 2.92) |                      | 1.03<br>(0.72, 1.46) | 1.20<br>(0.68, 1.95) | 1.31<br>(0.79, 2.11) |
| EIBUD      | 0.76<br>(0.43, 1.25) | 0.79<br>(0.39, 1.42) | 0.81<br>(0.54, 1.20) | 0.83<br>(0.44, 1.40) | 0.85<br>(0.48, 1.40) | 0.90<br>(0.45, 1.64) | 0.93<br>(0.72, 1.23) | 0.99<br>(0.47, 1.84) | 0.99<br>(0.49, 1.83) | 0.97<br>(0.60, 1.53) | 1.17<br>(0.38, 2.87) | 1.00<br>(0.69, 1.39) |                      | 1.16<br>(0.73, 1.73) | 1.28<br>(0.86, 1.86) |
| LIBUD      | 0.68<br>(0.34, 1.27) | 0.71<br>(0.31, 1.41) | 0.73<br>(0.41, 1.26) | 0.74<br>(0.35, 1.41) | 0.77<br>(0.37, 1.42) | 0.80<br>(0.36, 1.61) | 0.84<br>(0.51, 1.34) | 0.88<br>(0.39, 1.76) | 0.89<br>(0.39, 1.77) | 0.88<br>(0.46, 1.59) | 1.05<br>(0.31, 2.69) | 0.90<br>(0.51, 1.48) | 0.90<br>(0.58, 1.36) |                      | 1.13<br>(0.76, 1.68) |
| LaMdDX     | 0.61<br>(0.31, 1.09) | 0.64<br>(0.29, 1.21) | 0.66<br>(0.38, 1.06) | 0.67<br>(0.32, 1.21) | 0.69<br>(0.34, 1.22) | 0.72<br>(0.33, 1.36) | 0.75<br>(0.48, 1.12) | 0.79<br>(0.37, 1.48) | 0.80<br>(0.37, 1.53) | 0.79<br>(0.43, 1.34) | 0.94<br>(0.29, 2.34) | 0.81<br>(0.47, 1.27) | 0.81<br>(0.54, 1.16) | 0.93<br>(0.59, 1.32) |                      |

**eFigure 39. Direct Evidence from the Pair Wise Comparisons for Sepsis**

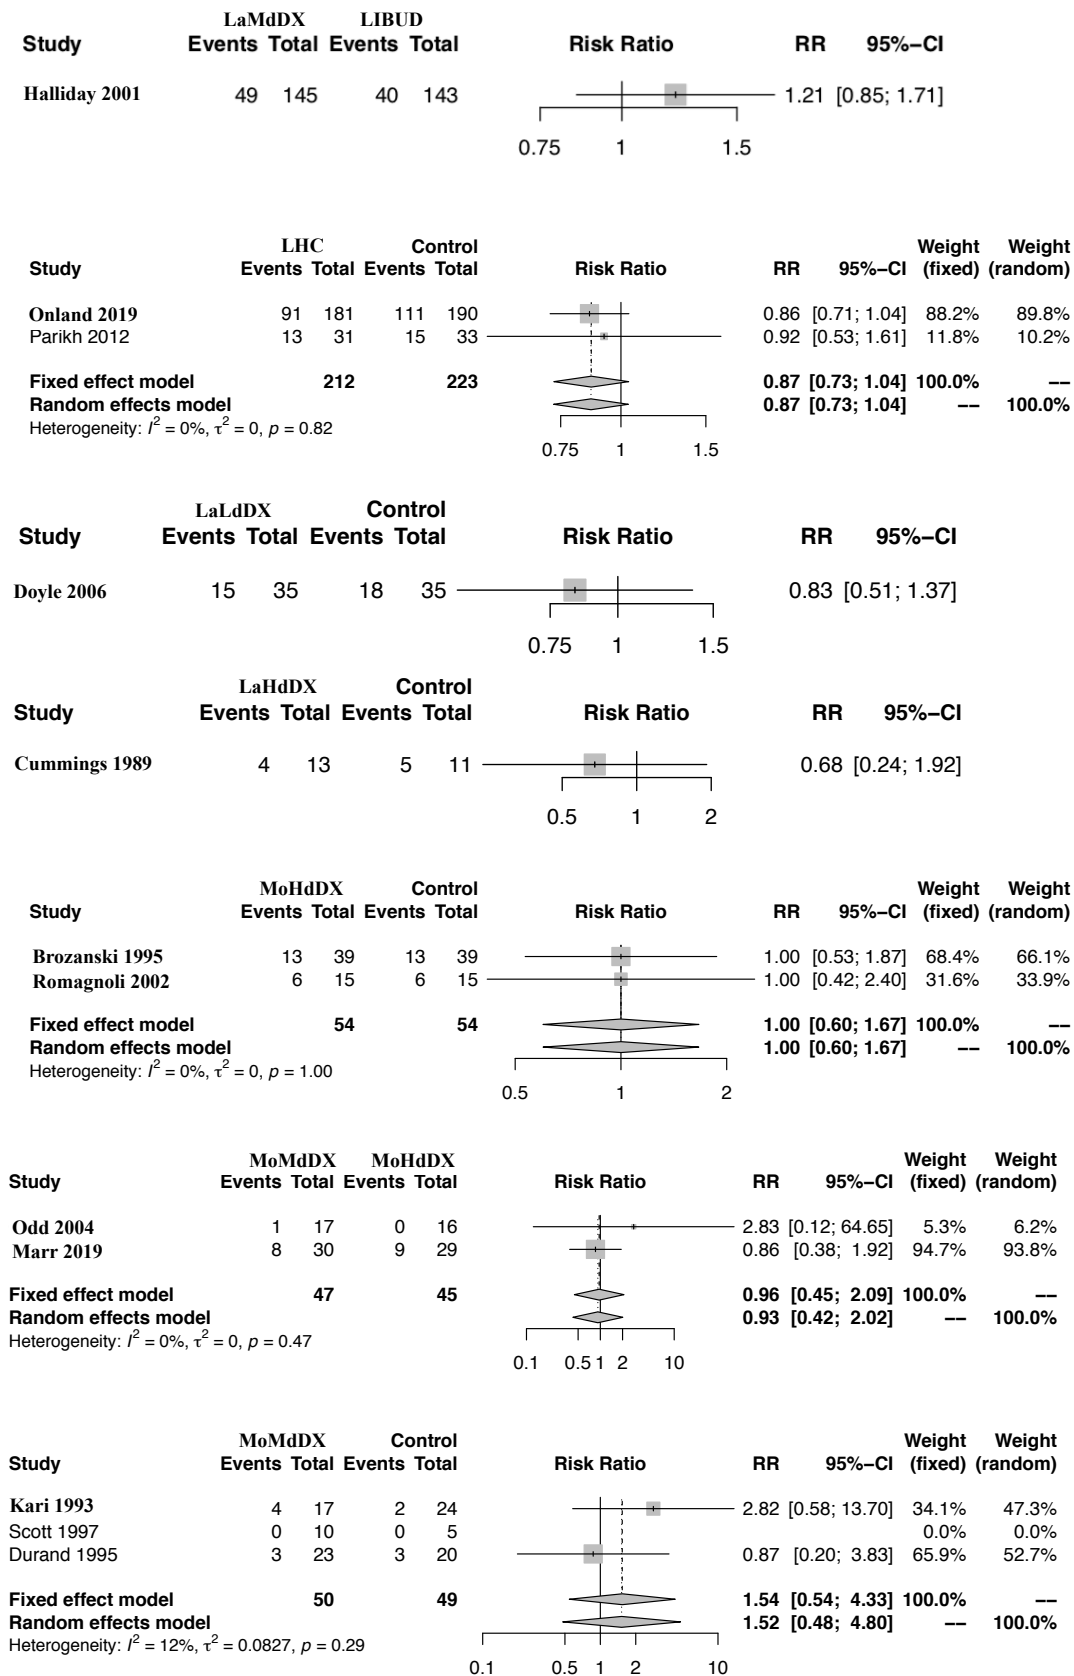



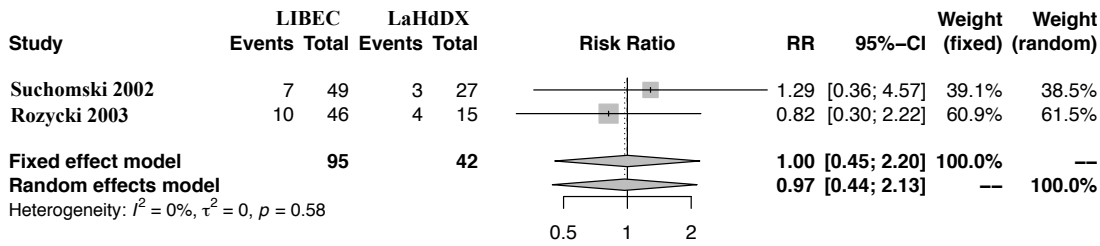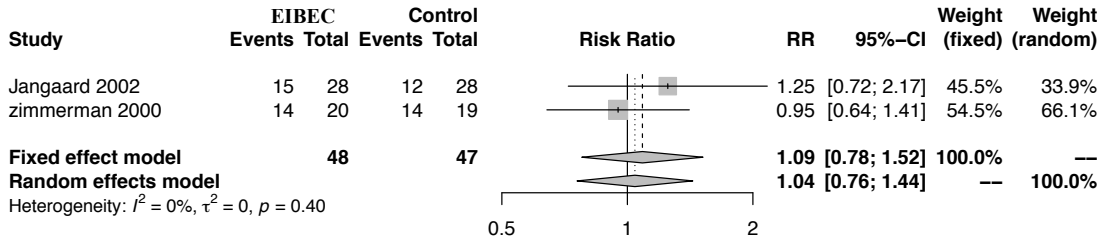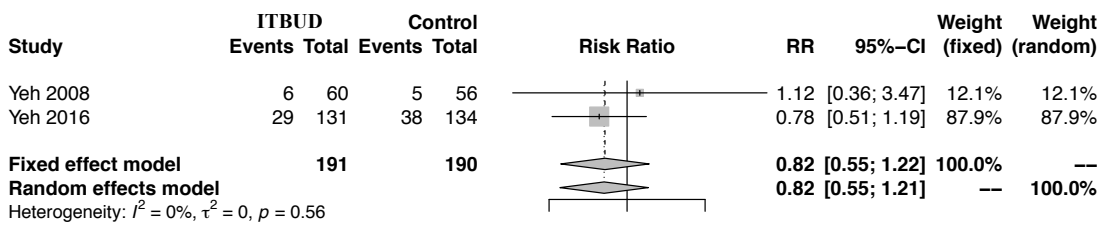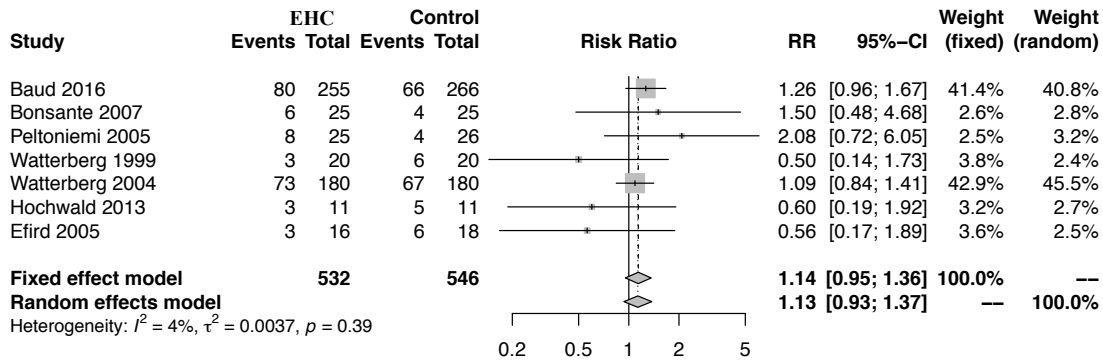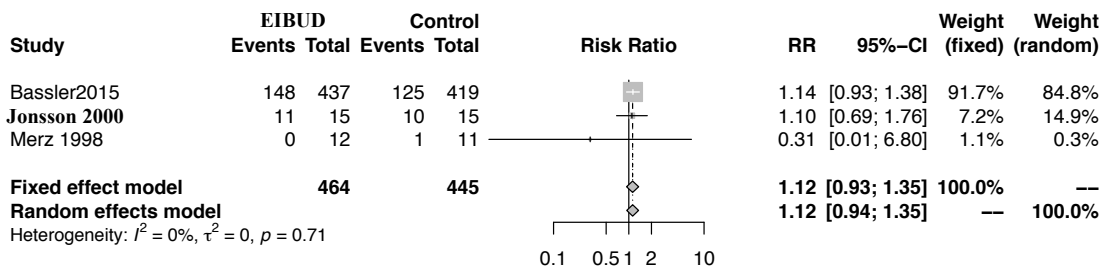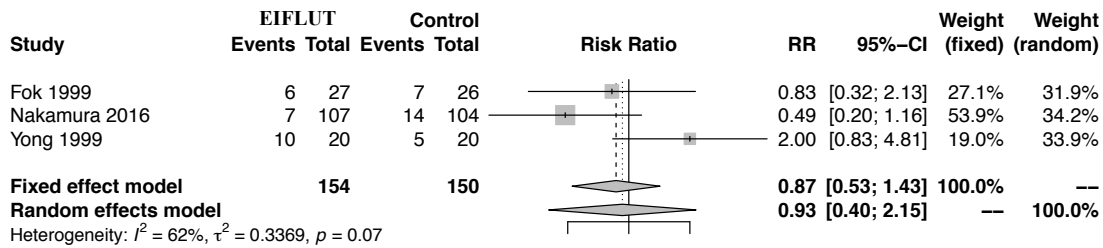

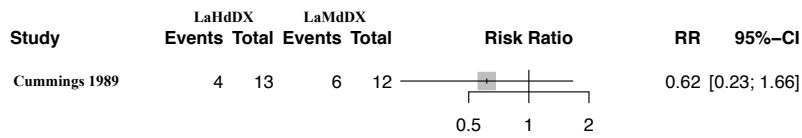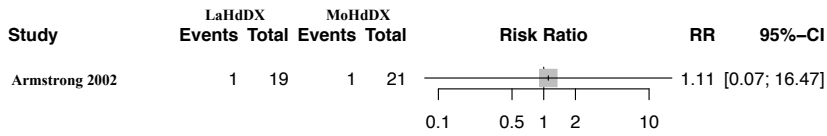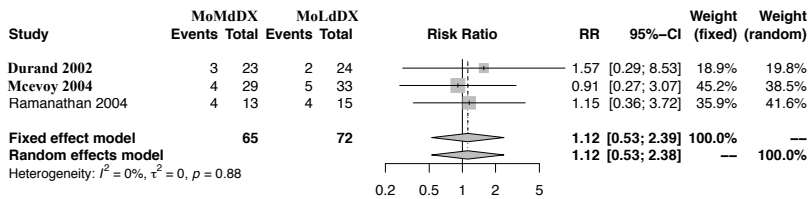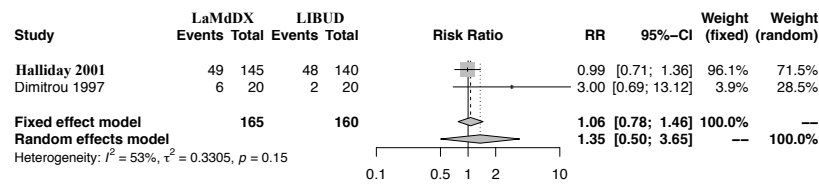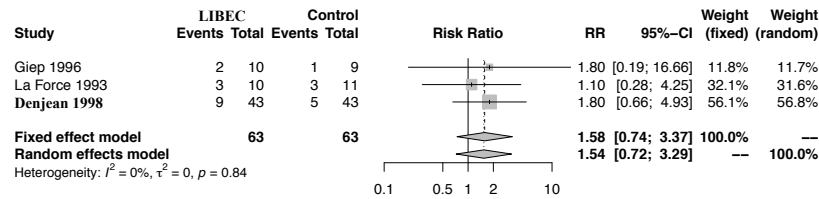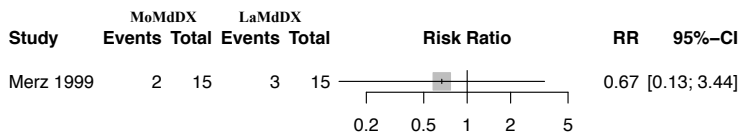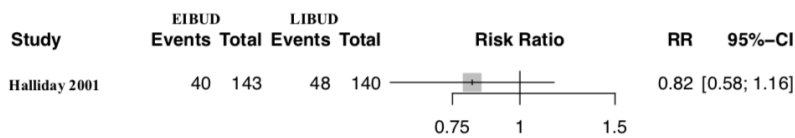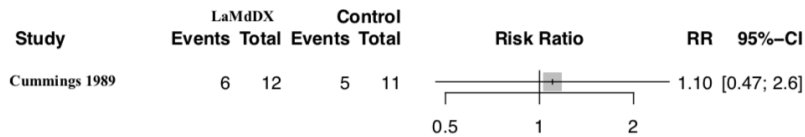

**eFigure 40. Split Between Direct and Indirect Evidence for Sepsis**

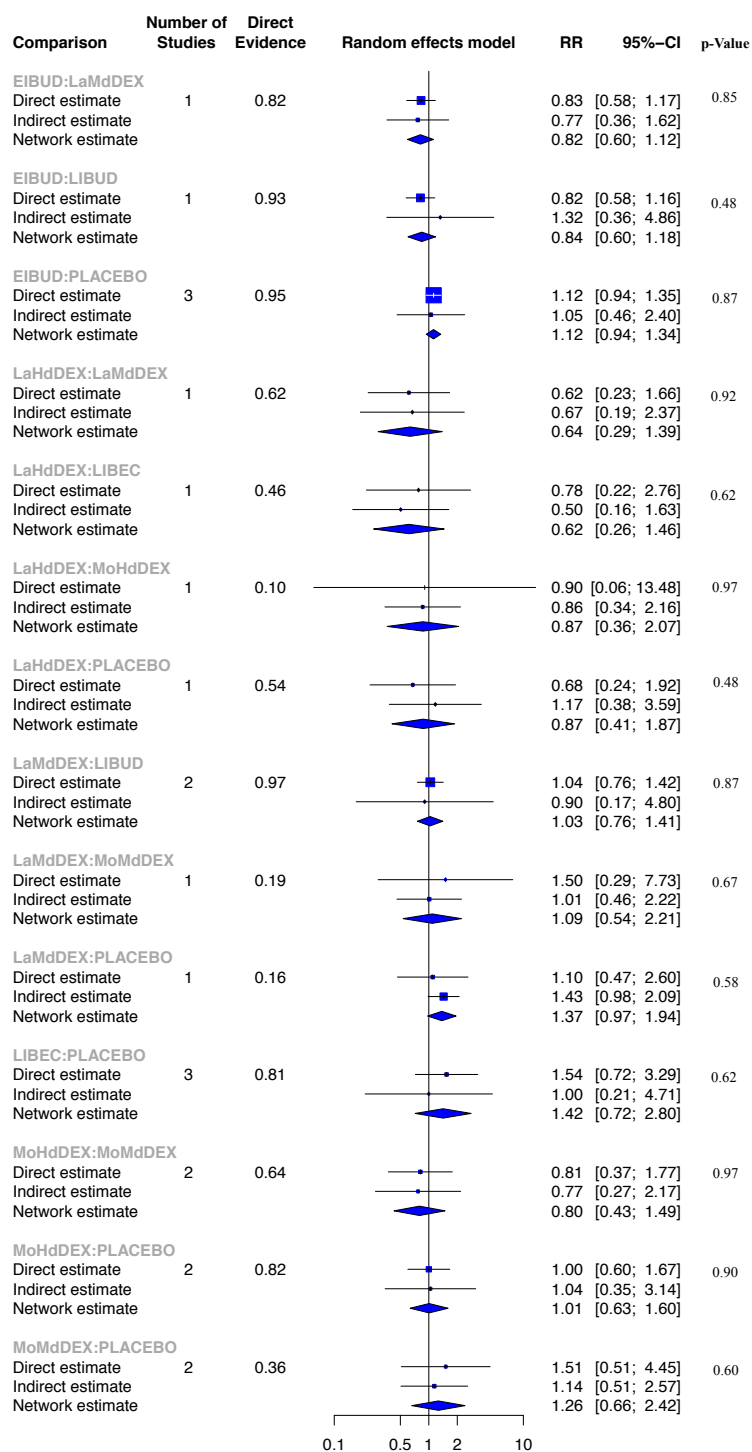

**eFigure 41. Network Plot (A), SUCRA Plot with SUCRA Values (%) (B), and Forest Plot Depicting the Network Estimates [RR (95% CrI)] of the Various Interventions with “Placebo” as the Common Comparator for Severe ROP (C)**

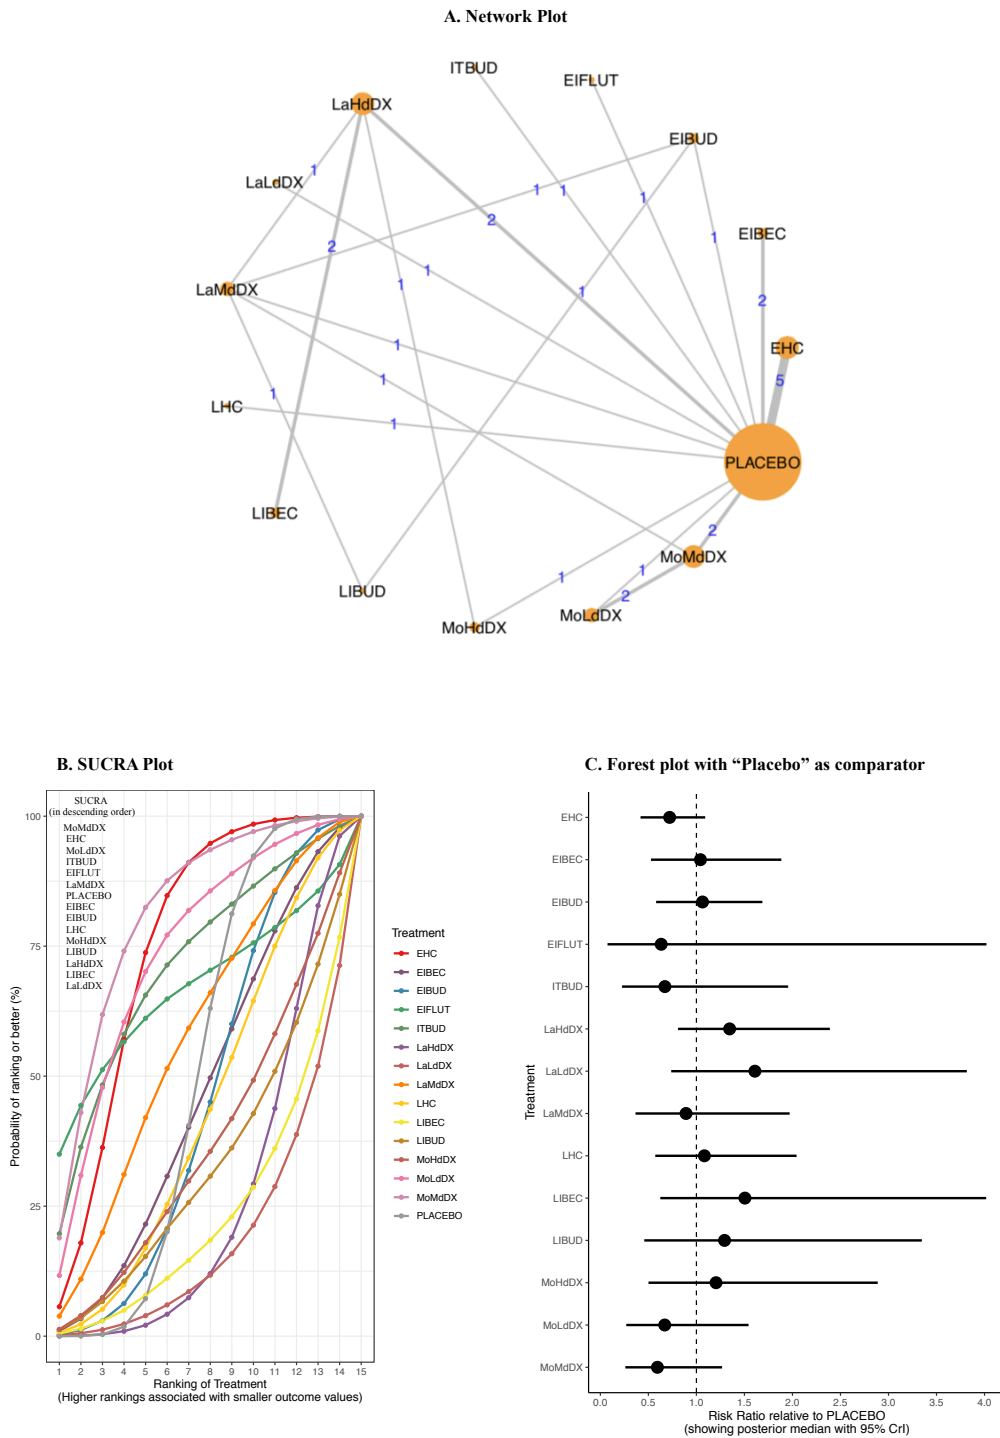

**eFigure 42. League Plot Depicting the Network Estimates [RR (95% CrI)] of Postnatal Corticosteroids Comparisons for Severe ROP**

| Comparator | Treatment            |                       |                       |                       |                      |                       |                       |                       |                       |                       |                       |                       |                       |                       |                       |
|------------|----------------------|-----------------------|-----------------------|-----------------------|----------------------|-----------------------|-----------------------|-----------------------|-----------------------|-----------------------|-----------------------|-----------------------|-----------------------|-----------------------|-----------------------|
|            | MoMdDX               | EHC                   | MoLdDX                | ITBUD                 | EIFLUT               | LaMdDX                | PLACEBO               | EIBEC                 | EIBUD                 | LHC                   | MoHdDX                | LIBUD                 | LaHdDX                | LIBEC                 | LaLdDX                |
| MoMdDX     |                      | 1.34<br>(0.49, 3.03)  | 1.23<br>(0.50, 2.54)  | 1.44<br>(0.30, 4.33)  | 1.83<br>(0.11, 7.84) | 1.73<br>(0.53, 4.33)  | 1.84<br>(0.79, 3.85)  | 2.00<br>(0.65, 4.84)  | 1.98<br>(0.72, 4.50)  | 2.10<br>(0.69, 5.16)  | 2.45<br>(0.65, 6.73)  | 2.63<br>(0.64, 7.29)  | 2.60<br>(0.93, 6.10)  | 3.15<br>(0.79, 8.97)  | 3.29<br>(0.92, 8.83)  |
| EHC        | 0.92<br>(0.33, 2.04) |                       | 1.06<br>(0.35, 2.50)  | 1.14<br>(0.29, 3.14)  | 1.46<br>(0.10, 6.09) | 1.40<br>(0.48, 3.19)  | 1.45<br>(0.92, 2.39)  | 1.57<br>(0.67, 3.20)  | 1.56<br>(0.75, 3.01)  | 1.66<br>(0.73, 3.57)  | 1.93<br>(0.65, 4.67)  | 2.10<br>(0.60, 5.41)  | 2.05<br>(0.99, 4.26)  | 2.49<br>(0.80, 6.58)  | 2.59<br>(0.95, 6.24)  |
| MoLdDX     | 0.97<br>(0.39, 2.01) | 1.21<br>(0.40, 2.88)  |                       | 1.30<br>(0.26, 4.08)  | 1.66<br>(0.10, 7.29) | 1.58<br>(0.41, 4.26)  | 1.66<br>(0.65, 3.71)  | 1.80<br>(0.53, 4.56)  | 1.79<br>(0.59, 4.26)  | 1.90<br>(0.57, 4.93)  | 2.21<br>(0.54, 6.30)  | 2.39<br>(0.52, 6.91)  | 2.35<br>(0.77, 5.95)  | 2.86<br>(0.67, 8.56)  | 2.98<br>(0.76, 8.42)  |
| ITBUD      | 1.11<br>(0.23, 3.31) | 1.27<br>(0.32, 3.41)  | 1.27<br>(0.24, 3.88)  |                       | 1.78<br>(0.08, 8.23) | 1.68<br>(0.33, 5.10)  | 1.74<br>(0.51, 4.42)  | 1.88<br>(0.43, 5.30)  | 1.88<br>(0.46, 5.09)  | 1.99<br>(0.47, 5.70)  | 2.31<br>(0.45, 7.09)  | 2.52<br>(0.43, 8.10)  | 2.45<br>(0.62, 6.81)  | 2.99<br>(0.56, 9.79)  | 3.11<br>(0.64, 9.62)  |
| EIFLUT     | 1.86<br>(0.13, 9.16) | 2.12<br>(0.16, 10.06) | 2.13<br>(0.14, 10.05) | 2.33<br>(0.12, 11.98) |                      | 2.77<br>(0.18, 13.51) | 2.91<br>(0.25, 13.39) | 3.14<br>(0.23, 14.97) | 3.13<br>(0.24, 14.69) | 3.31<br>(0.24, 16.01) | 3.88<br>(0.24, 18.70) | 4.17<br>(0.24, 20.50) | 4.11<br>(0.31, 19.83) | 4.97<br>(0.30, 25.29) | 5.16<br>(0.34, 25.65) |
| LaMdDX     | 0.77<br>(0.23, 1.89) | 0.90<br>(0.31, 2.10)  | 0.89<br>(0.23, 2.42)  | 0.97<br>(0.20, 2.99)  | 1.25<br>(0.07, 5.45) |                       | 1.24<br>(0.51, 2.73)  | 1.34<br>(0.41, 3.33)  | 1.29<br>(0.53, 2.73)  | 1.42<br>(0.44, 3.61)  | 1.66<br>(0.42, 4.78)  | 1.61<br>(0.57, 3.67)  | 1.73<br>(0.64, 4.11)  | 2.10<br>(0.55, 6.08)  | 2.23<br>(0.60, 6.21)  |
| PLACEBO    | 0.64<br>(0.26, 1.27) | 0.73<br>(0.42, 1.09)  | 0.73<br>(0.27, 1.54)  | 0.78<br>(0.23, 1.96)  | 1.00<br>(0.07, 4.02) | 0.97<br>(0.37, 1.97)  |                       | 1.08<br>(0.53, 1.88)  | 1.08<br>(0.58, 1.69)  | 1.14<br>(0.57, 2.04)  | 1.33<br>(0.50, 2.89)  | 1.45<br>(0.46, 3.35)  | 1.41<br>(0.81, 2.39)  | 1.71<br>(0.62, 4.02)  | 1.78<br>(0.74, 3.82)  |
| EIBEC      | 0.65<br>(0.21, 1.55) | 0.74<br>(0.31, 1.48)  | 0.75<br>(0.22, 1.88)  | 0.80<br>(0.19, 2.31)  | 1.03<br>(0.07, 4.41) | 0.99<br>(0.30, 2.43)  | 1.02<br>(0.53, 1.90)  |                       | 1.10<br>(0.45, 2.30)  | 1.17<br>(0.44, 2.69)  | 1.36<br>(0.41, 3.49)  | 1.48<br>(0.39, 4.04)  | 1.45<br>(0.60, 3.25)  | 1.76<br>(0.50, 4.87)  | 1.83<br>(0.59, 4.65)  |
| EIBUD      | 0.63<br>(0.22, 1.39) | 0.72<br>(0.33, 1.33)  | 0.72<br>(0.23, 1.71)  | 0.78<br>(0.20, 2.16)  | 1.00<br>(0.07, 4.13) | 0.92<br>(0.37, 1.90)  | 0.99<br>(0.59, 1.72)  | 1.07<br>(0.43, 2.23)  |                       | 1.14<br>(0.47, 2.48)  | 1.32<br>(0.43, 3.20)  | 1.36<br>(0.48, 3.06)  | 1.40<br>(0.66, 2.96)  | 1.70<br>(0.54, 4.53)  | 1.78<br>(0.63, 4.33)  |
| LHC        | 0.62<br>(0.19, 1.45) | 0.71<br>(0.28, 1.38)  | 0.71<br>(0.20, 1.74)  | 0.76<br>(0.18, 2.14)  | 0.98<br>(0.06, 4.15) | 0.94<br>(0.28, 2.28)  | 0.97<br>(0.49, 1.75)  | 1.05<br>(0.37, 2.25)  | 1.05<br>(0.40, 2.11)  |                       | 1.30<br>(0.38, 3.27)  | 1.41<br>(0.35, 3.76)  | 1.37<br>(0.56, 2.98)  | 1.67<br>(0.47, 4.50)  | 1.74<br>(0.55, 4.37)  |
| MoHdDX     | 0.58<br>(0.15, 1.53) | 0.67<br>(0.21, 1.55)  | 0.67<br>(0.16, 1.85)  | 0.72<br>(0.14, 2.22)  | 0.92<br>(0.05, 4.15) | 0.88<br>(0.21, 2.39)  | 0.92<br>(0.35, 2.00)  | 0.99<br>(0.29, 2.47)  | 0.99<br>(0.31, 2.34)  | 1.05<br>(0.31, 2.65)  |                       | 1.33<br>(0.28, 3.91)  | 1.28<br>(0.43, 3.05)  | 1.55<br>(0.38, 4.48)  | 1.64<br>(0.42, 4.53)  |
| LIBUD      | 0.56<br>(0.14, 1.56) | 0.65<br>(0.18, 1.67)  | 0.65<br>(0.14, 1.92)  | 0.70<br>(0.12, 2.32)  | 0.90<br>(0.05, 4.12) | 0.78<br>(0.27, 1.75)  | 0.90<br>(0.30, 2.19)  | 0.97<br>(0.25, 2.60)  | 0.92<br>(0.33, 2.06)  | 1.03<br>(0.27, 2.83)  | 1.19<br>(0.26, 3.63)  |                       | 1.25<br>(0.37, 3.34)  | 1.52<br>(0.33, 4.72)  | 1.61<br>(0.36, 4.87)  |
| LaHdDX     | 0.49<br>(0.16, 1.08) | 0.56<br>(0.23, 1.01)  | 0.56<br>(0.17, 1.31)  | 0.60<br>(0.15, 1.61)  | 0.77<br>(0.05, 3.22) | 0.73<br>(0.24, 1.56)  | 0.76<br>(0.42, 1.24)  | 0.83<br>(0.31, 1.66)  | 0.82<br>(0.34, 1.51)  | 0.87<br>(0.34, 1.79)  | 1.00<br>(0.33, 2.30)  | 1.09<br>(0.30, 2.68)  |                       | 1.21<br>(0.55, 2.47)  | 1.36<br>(0.45, 3.23)  |
| LIBEC      | 0.47<br>(0.11, 1.27) | 0.53<br>(0.15, 1.25)  | 0.54<br>(0.12, 1.50)  | 0.57<br>(0.10, 1.79)  | 0.73<br>(0.04, 3.34) | 0.70<br>(0.16, 1.83)  | 0.73<br>(0.25, 1.60)  | 0.79<br>(0.21, 1.99)  | 0.79<br>(0.22, 1.84)  | 0.84<br>(0.22, 2.12)  | 0.96<br>(0.22, 2.64)  | 1.05<br>(0.21, 3.02)  | 0.96<br>(0.41, 1.83)  |                       | 1.30<br>(0.31, 3.58)  |
| LaLdDX     | 0.43<br>(0.11, 1.09) | 0.49<br>(0.16, 1.06)  | 0.49<br>(0.12, 1.31)  | 0.52<br>(0.10, 1.57)  | 0.67<br>(0.04, 2.91) | 0.65<br>(0.16, 1.67)  | 0.67<br>(0.26, 1.36)  | 0.72<br>(0.22, 1.70)  | 0.72<br>(0.23, 1.59)  | 0.76<br>(0.23, 1.82)  | 0.89<br>(0.22, 2.39)  | 0.97<br>(0.21, 2.77)  | 0.94<br>(0.31, 2.22)  | 1.14<br>(0.28, 3.27)  |                       |

**eFigure 43. Direct Evidence from the Pair Wise Comparisons for Severe ROP**

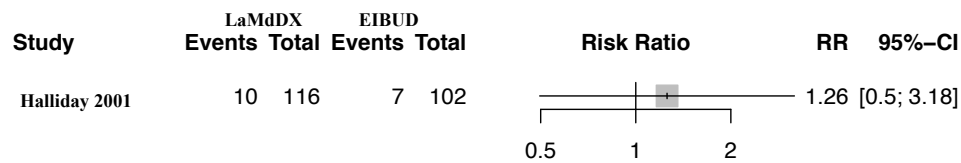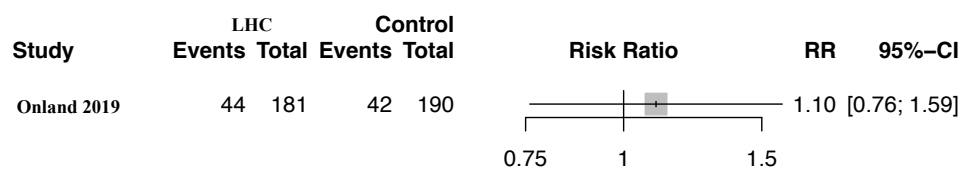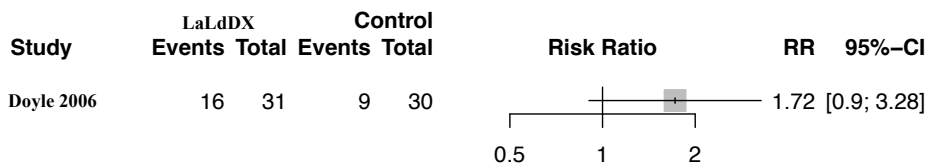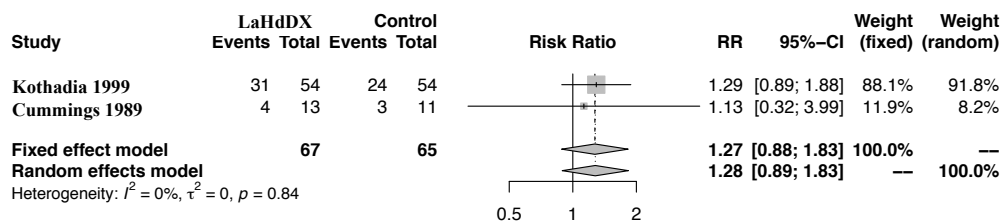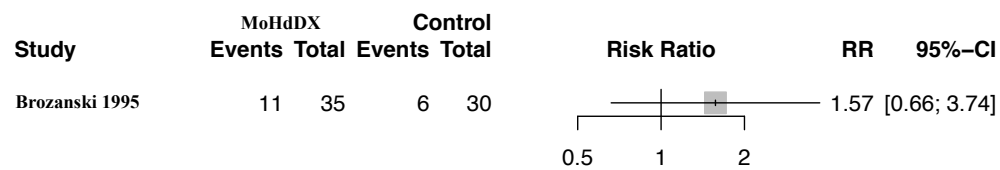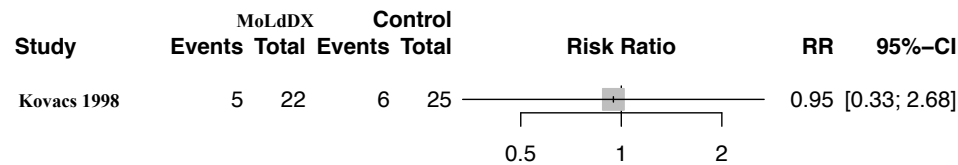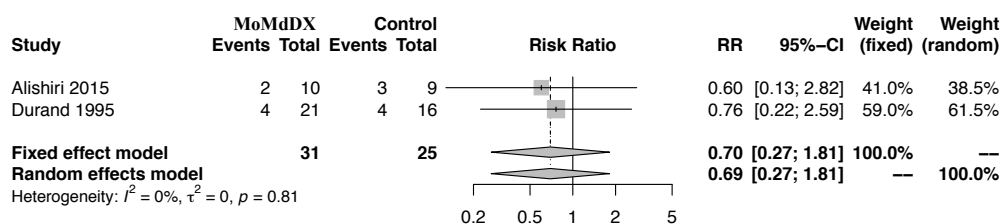

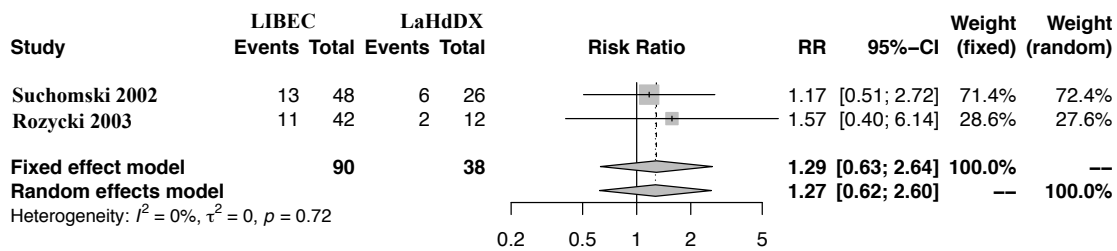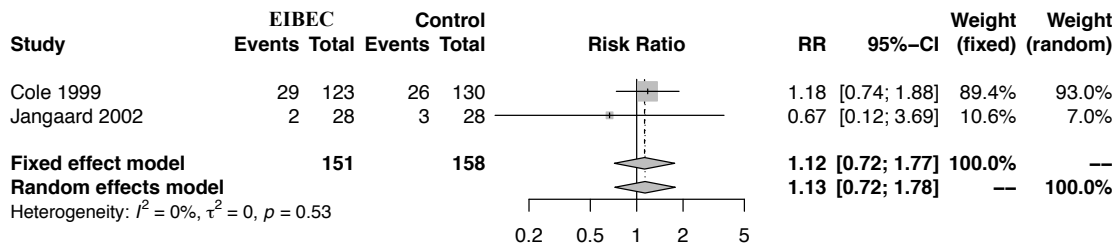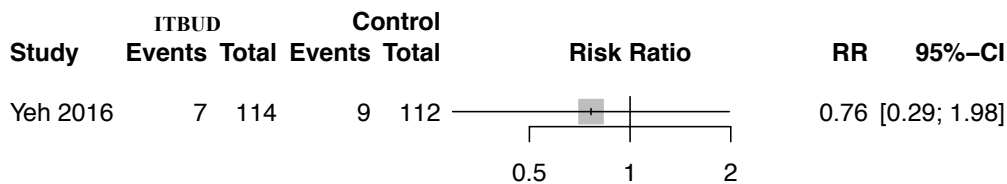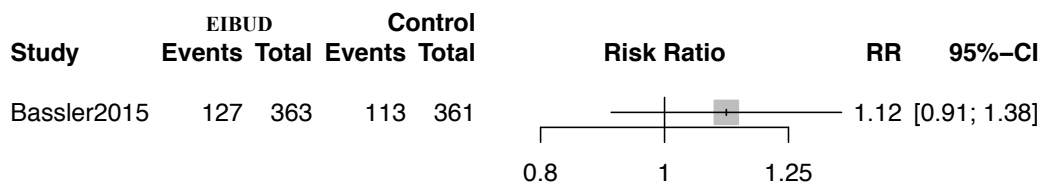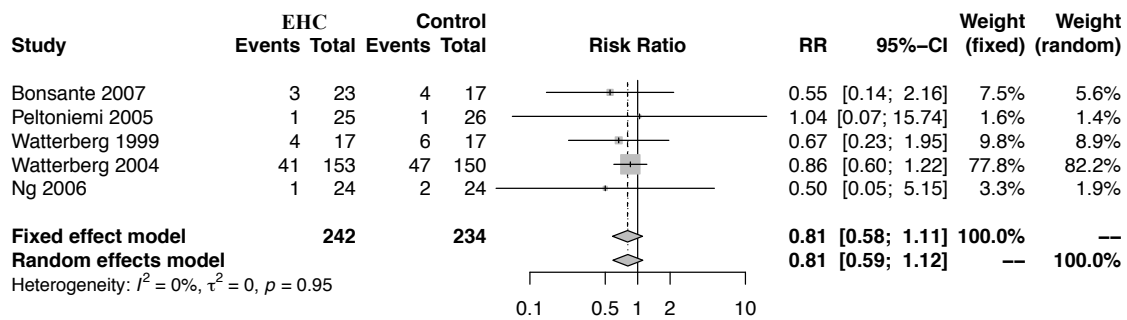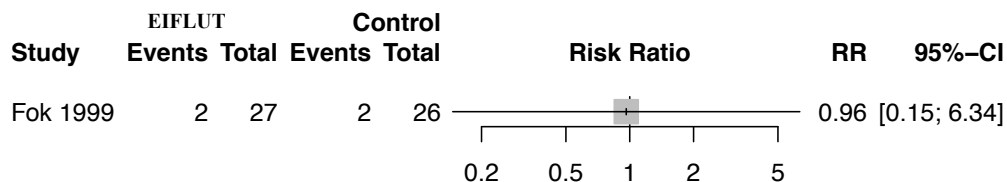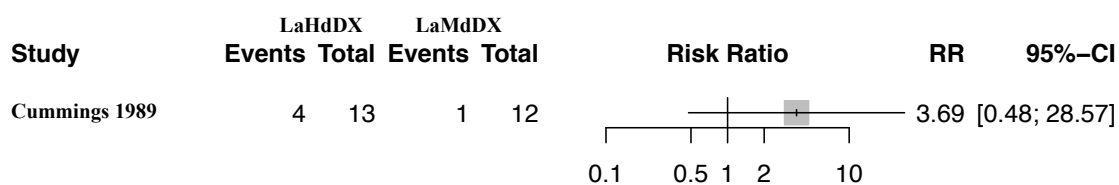

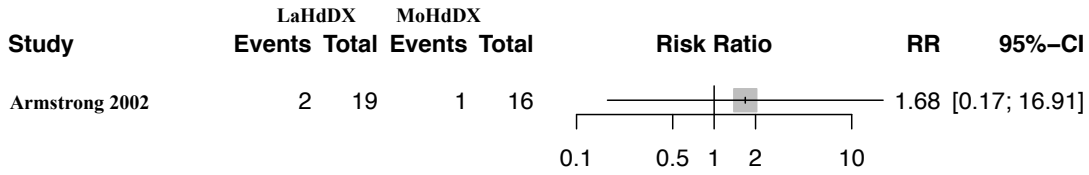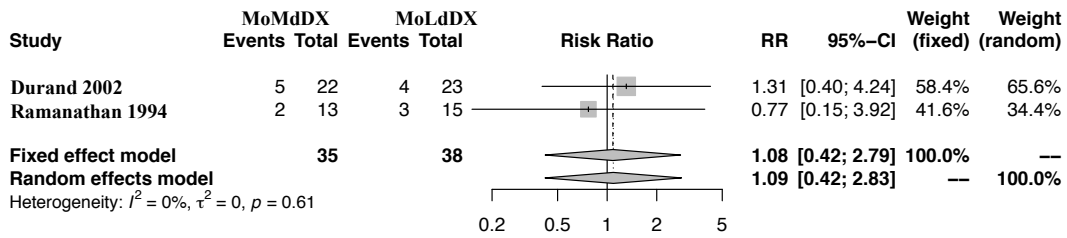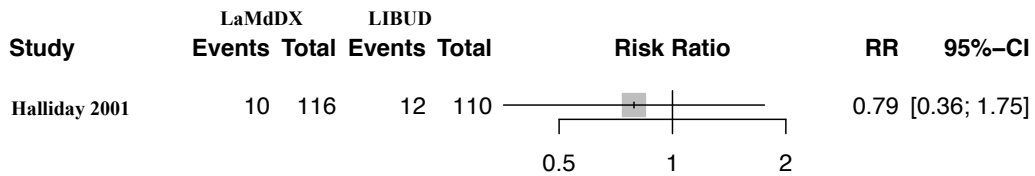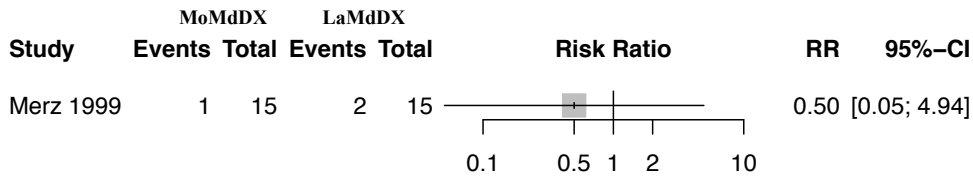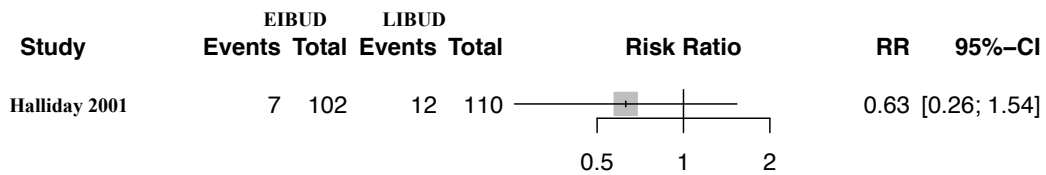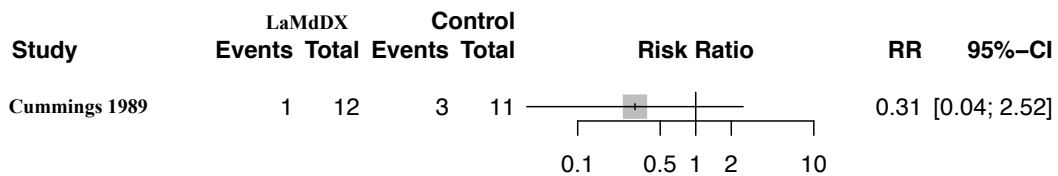



# eFigure 44. Split Between Direct and Indirect Evidence for Severe ROP

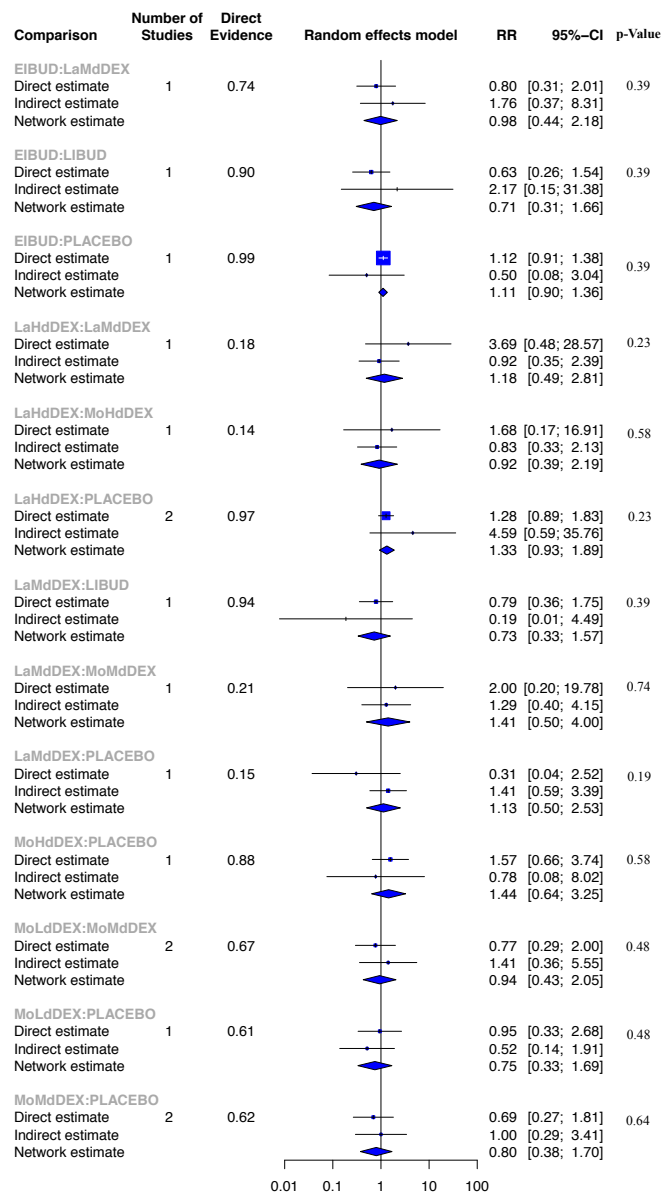

**eFigure 45. Network Plot (A), SUCRA Plot with SUCRA Values (%) (B), and Forest Plot Depicting the Network Estimates [RR (95% CrI)] of the Various Interventions with “Placebo” as the Common Comparator for NEC (C)**

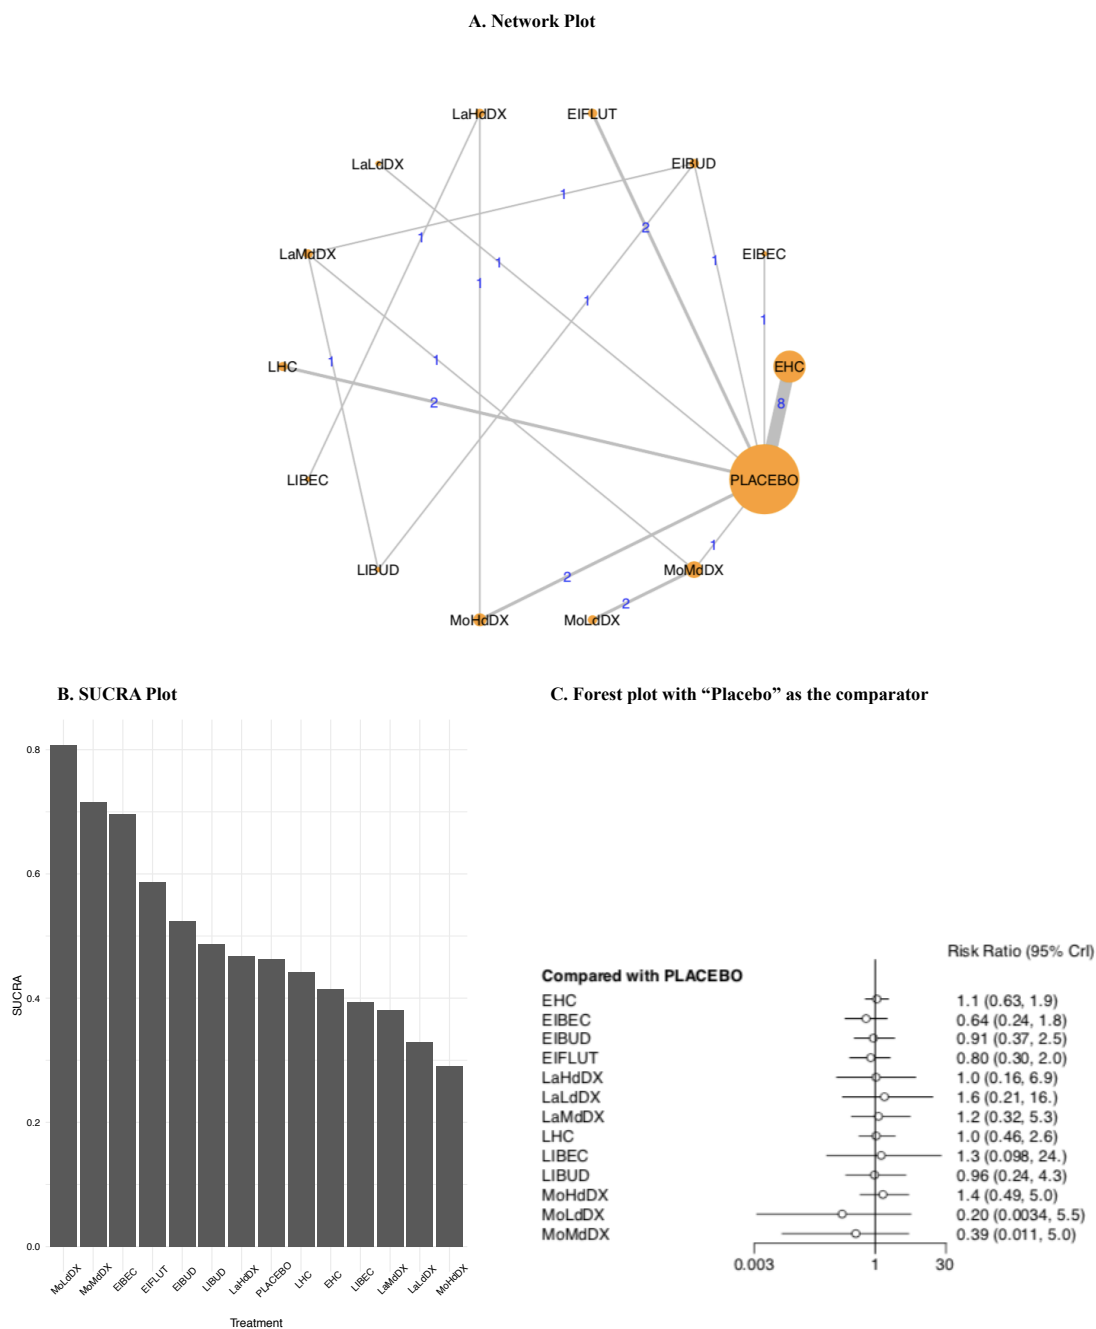

**eFigure 46. League Plot Depicting the Network Estimates [RR (95% CrI)] of Postnatal Corticosteroids Comparisons for NEC**

|                        |                       |                        |                        |                        |                        |                        |                        |                        |                        |                        |                      |                      |                        |
|------------------------|-----------------------|------------------------|------------------------|------------------------|------------------------|------------------------|------------------------|------------------------|------------------------|------------------------|----------------------|----------------------|------------------------|
| <b>EHC</b>             | 0.6<br>(0.19, 1.87)   | 0.85<br>(0.3, 2.62)    | 0.75<br>(0.24, 2.17)   | 0.96<br>(0.13, 6.88)   | 1.46<br>(0.18, 15.65)  | 1.09<br>(0.26, 5.44)   | 0.97<br>(0.37, 2.8)    | 1.24<br>(0.09, 23.28)  | 0.9 (0.2, 4.39)        | 1.35<br>(0.4, 5.11)    | 0.19 (0, 5.48)       | 0.36<br>(0.01, 4.86) | 0.93<br>(0.54, 1.58)   |
| 1.68<br>(0.53, 5.24)   | <b>EIBEC</b>          | 1.41<br>(0.38, 5.94)   | 1.25<br>(0.3, 4.71)    | 1.61<br>(0.19, 13.78)  | 2.44<br>(0.25, 30.94)  | 1.82<br>(0.36, 11.27)  | 1.61<br>(0.45, 6.46)   | 2.07<br>(0.13, 44.38)  | 1.5<br>(0.28, 9.39)    | 2.25<br>(0.52, 11.1)   | 0.31 (0, 10.19)      | 0.6<br>(0.02, 9.27)  | 1.56<br>(0.57, 4.23)   |
| 1.18<br>(0.38, 3.37)   | 0.71<br>(0.17, 2.66)  | <b>EIBUD</b>           | 0.88<br>(0.22, 3.13)   | 1.13<br>(0.13, 9.03)   | 1.7<br>(0.18, 19.72)   | 1.28<br>(0.47, 3.95)   | 1.14<br>(0.32, 4.12)   | 1.46<br>(0.09, 29.25)  | 1.06<br>(0.36, 3.22)   | 1.58<br>(0.37, 7.1)    | 0.22 (0, 6.27)       | 0.43<br>(0.01, 5.68) | 1.1<br>(0.4, 2.7)      |
| 1.34<br>(0.46, 4.17)   | 0.8<br>(0.21, 3.34)   | 1.14<br>(0.32, 4.63)   | <b>EHFLUT</b>          | 1.3<br>(0.16, 10.97)   | 1.97<br>(0.21, 24.94)  | 1.46<br>(0.3, 9.11)    | 1.3<br>(0.38, 5.02)    | 1.68<br>(0.1, 34.07)   | 1.2<br>(0.24, 7.27)    | 1.8<br>(0.44, 8.87)    | 0.26 (0, 7.94)       | 0.49<br>(0.01, 7.45) | 1.25<br>(0.49, 3.36)   |
| 1.04<br>(0.15, 7.43)   | 0.62<br>(0.07, 5.22)  | 0.89<br>(0.11, 7.41)   | 0.77<br>(0.09, 6.3)    | <b>LaHdDX</b>          | 1.54<br>(0.1, 27.78)   | 1.15<br>(0.12, 12.39)  | 1.02<br>(0.13, 8.13)   | 1.27<br>(0.2, 11.71)   | 0.94<br>(0.09, 10.41)  | 1.39<br>(0.32, 6.66)   | 0.19 (0, 8.7)        | 0.36<br>(0.01, 8.68) | 0.97<br>(0.15, 6.3)    |
| 0.69<br>(0.06, 5.59)   | 0.41<br>(0.03, 3.97)  | 0.59<br>(0.05, 5.6)    | 0.51<br>(0.04, 4.75)   | 0.65<br>(0.04, 10.3)   | <b>LaLdDX</b>          | 0.75<br>(0.06, 9.32)   | 0.68<br>(0.06, 6.18)   | 0.86<br>(0.03, 26.58)  | 0.61<br>(0.04, 7.73)   | 0.92<br>(0.07, 9.75)   | 0.12 (0, 6.24)       | 0.23 (0, 6.3)        | 0.64<br>(0.06, 4.78)   |
| 0.92<br>(0.18, 3.81)   | 0.55<br>(0.09, 2.75)  | 0.78<br>(0.25, 2.15)   | 0.69<br>(0.11, 3.29)   | 0.87<br>(0.08, 8.34)   | 1.33<br>(0.11, 18.1)   | <b>LaMdDX</b>          | 0.89<br>(0.16, 4.36)   | 1.13<br>(0.05, 24.44)  | 0.82<br>(0.27, 2.31)   | 1.22<br>(0.2, 7.04)    | 0.17 (0, 4.92)       | 0.33<br>(0.01, 4.62) | 0.86<br>(0.19, 3.12)   |
| 1.03<br>(0.36, 2.73)   | 0.62<br>(0.15, 2.21)  | 0.88<br>(0.24, 3.1)    | 0.77<br>(0.2, 2.62)    | 0.98<br>(0.12, 7.59)   | 1.48<br>(0.16, 17.18)  | 1.12<br>(0.23, 6.11)   | <b>LHC</b>             | 1.28<br>(0.08, 24.63)  | 0.93<br>(0.18, 4.98)   | 1.38<br>(0.34, 6)      | 0.19 (0, 5.74)       | 0.37<br>(0.01, 5.21) | 0.96<br>(0.39, 2.17)   |
| 0.81<br>(0.04, 11.55)  | 0.48<br>(0.02, 7.73)  | 0.68<br>(0.03, 11.51)  | 0.59<br>(0.03, 9.7)    | 0.79<br>(0.09, 4.96)   | 1.17<br>(0.04, 39.46)  | 0.89<br>(0.04, 18.21)  | 0.78<br>(0.04, 12.76)  | <b>LIBEC</b>           | 0.73<br>(0.03, 14.63)  | 1.08<br>(0.08, 12.01)  | 0.15 (0, 10.32)      | 0.28 (0, 11.26)      | 0.75<br>(0.04, 10.26)  |
| 1.11<br>(0.23, 4.91)   | 0.67<br>(0.11, 3.58)  | 0.94<br>(0.31, 2.79)   | 0.83<br>(0.14, 4.2)    | 1.06<br>(0.1, 11.2)    | 1.63<br>(0.13, 23.36)  | 1.21<br>(0.43, 3.67)   | 1.07<br>(0.2, 5.62)    | 1.37<br>(0.07, 31.43)  | <b>LIBUD</b>           | 1.49<br>(0.24, 9.26)   | 0.21 (0, 6.61)       | 0.4<br>(0.01, 6.12)  | 1.04<br>(0.23, 4.11)   |
| 0.74<br>(0.2, 2.52)    | 0.45<br>(0.09, 1.93)  | 0.63<br>(0.14, 2.7)    | 0.56<br>(0.11, 2.26)   | 0.72<br>(0.15, 3.08)   | 1.08<br>(0.1, 13.54)   | 0.82<br>(0.14, 4.95)   | 0.72<br>(0.17, 2.94)   | 0.92<br>(0.08, 12.24)  | 0.67<br>(0.11, 4.16)   | <b>MoHdDX</b>          | 0.14 (0, 4.45)       | 0.27<br>(0.01, 4.18) | 0.69<br>(0.2, 2.06)    |
| 5.32<br>(0.18, 330.47) | 3.19<br>(0.1, 205.63) | 4.48<br>(0.16, 285.57) | 3.88<br>(0.13, 249.64) | 5.15<br>(0.11, 462.36) | 8.03<br>(0.16, 797.65) | 5.75<br>(0.2, 398.13)  | 5.16<br>(0.17, 331.58) | 6.83<br>(0.1, 936.44)  | 4.72<br>(0.15, 336.81) | 7.19<br>(0.22, 514.58) | <b>MoLdDX</b>        | 1.8<br>(0.25, 16.02) | 4.91<br>(0.18, 295.76) |
| 2.77<br>(0.21, 97.12)  | 1.67<br>(0.11, 65.27) | 2.32<br>(0.18, 87.65)  | 2.04<br>(0.13, 83.06)  | 2.75<br>(0.12, 143.52) | 4.29<br>(0.16, 254.21) | 3.03<br>(0.22, 124.09) | 2.71<br>(0.19, 105.59) | 3.63<br>(0.09, 334.47) | 2.49<br>(0.16, 105.09) | 3.77<br>(0.24, 158.69) | 0.56<br>(0.06, 4.01) | <b>MoMdDX</b>        | 2.55<br>(0.2, 87.74)   |
| 1.08<br>(0.63, 1.86)   | 0.64<br>(0.24, 1.75)  | 0.91<br>(0.37, 2.49)   | 0.8 (0.3, 2.02)        | 1.03<br>(0.16, 6.89)   | 1.56<br>(0.21, 15.79)  | 1.17<br>(0.32, 5.33)   | 1.04<br>(0.46, 2.59)   | 1.33<br>(0.1, 23.7)    | 0.96<br>(0.24, 4.32)   | 1.44<br>(0.49, 4.96)   | 0.2 (0, 5.54)        | 0.39<br>(0.01, 4.96) | <b>PLACEBO</b>         |

**eFigure 47. Direct Evidence from the Pair Wise Comparisons for NEC**

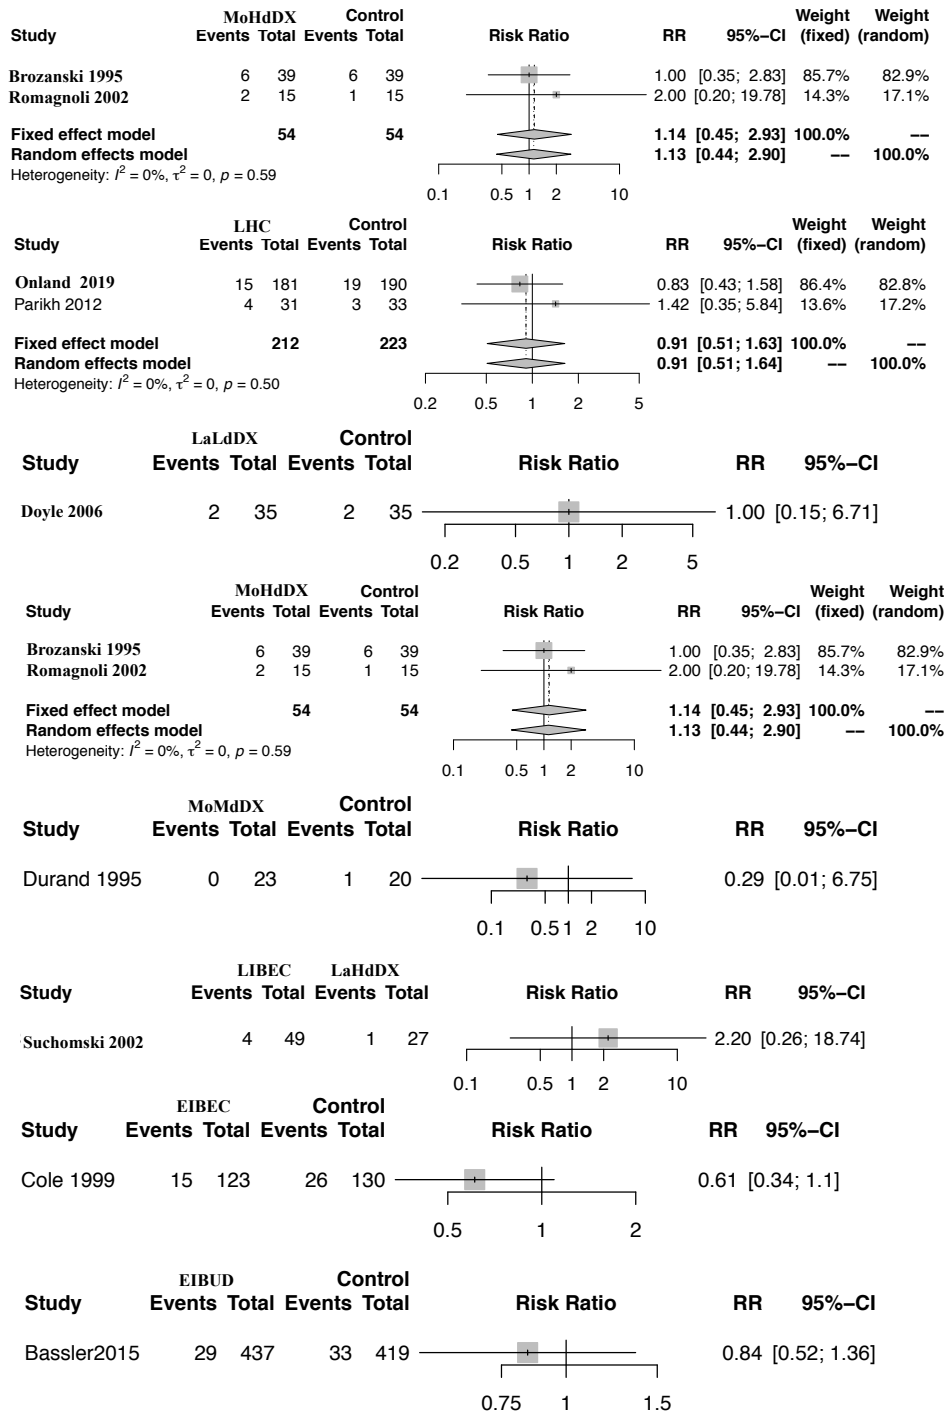

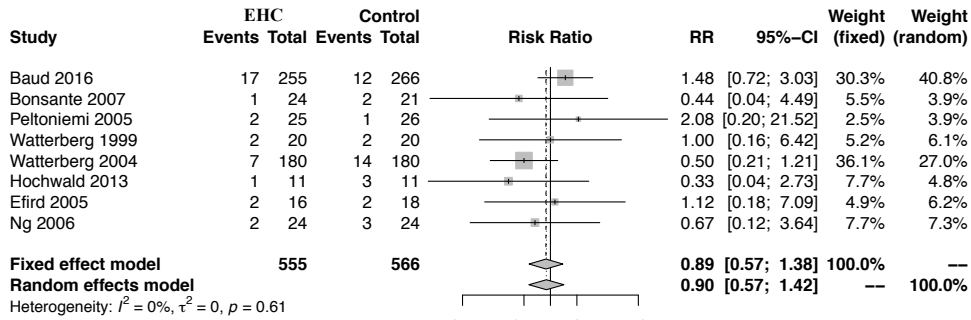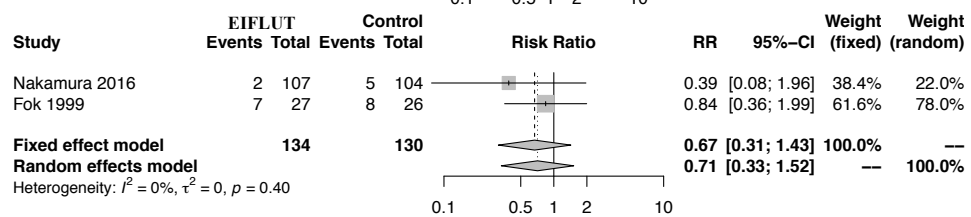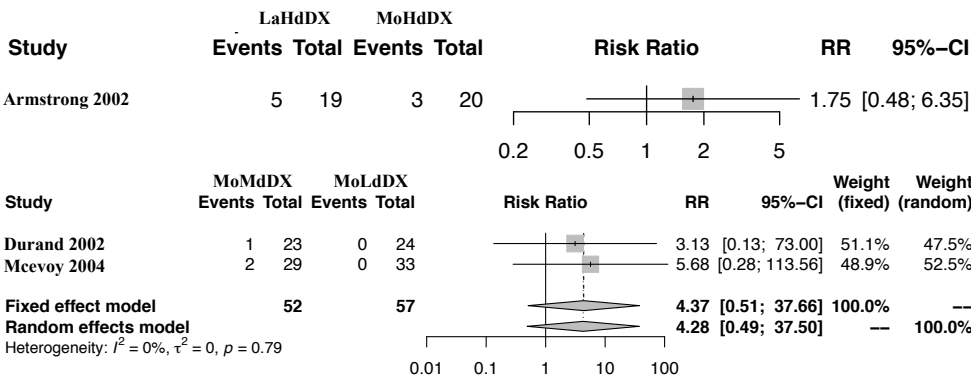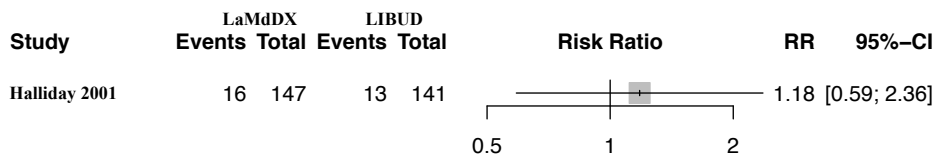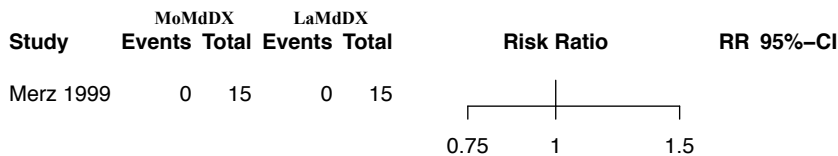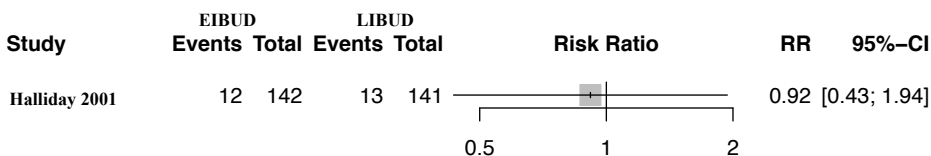

**eFigure 48. Network Plot (A), SUCRA Plot with SUCRA Values (%) (B), and Forest Plot (C) Depicting the Network Estimates [RR (95% CrI)] of the Various Interventions with “Placebo” as the Common Comparator for IVH>II (C)**

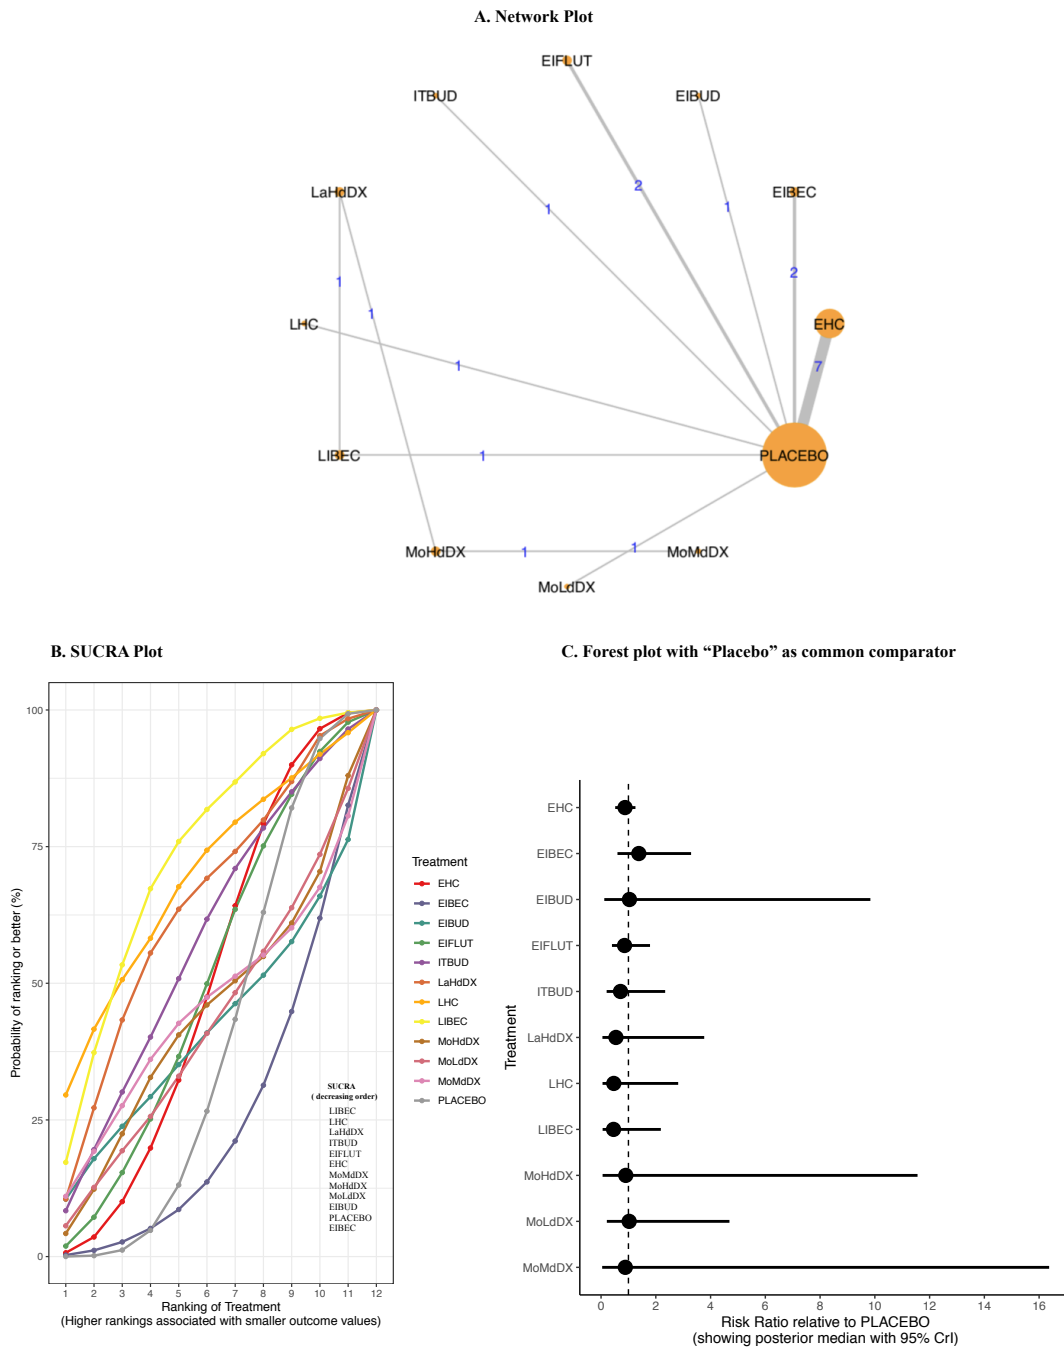

**eFigure 49. League Plot Depicting the Network Estimates [RR (95% CrI)] of Postnatal Corticosteroids Comparisons for IVH >II**

|            |         | Treatment             |                       |                       |                       |                       |                       |                        |                       |                       |                       |                       |                       |
|------------|---------|-----------------------|-----------------------|-----------------------|-----------------------|-----------------------|-----------------------|------------------------|-----------------------|-----------------------|-----------------------|-----------------------|-----------------------|
|            |         | LIBEC                 | LHC                   | LaHdDX                | ITBUD                 | EHC                   | EIFLUT                | MoMdDX                 | MoHdDX                | EIBUD                 | MoLdDX                | PLACEBO               | EIBEC                 |
| Comparator | LIBEC   |                       | 2.77<br>(0.08, 14.88) | 1.42<br>(0.37, 3.62)  | 3.42<br>(0.21, 16.89) | 3.46<br>(0.36, 15.28) | 3.59<br>(0.32, 17.30) | 4.40<br>(0.19, 22.43)  | 3.42<br>(0.30, 14.69) | 8.17<br>(0.15, 48.44) | 5.37<br>(0.24, 28.70) | 3.92<br>(0.46, 17.50) | 5.97<br>(0.52, 28.17) |
|            | LHC     | 2.42<br>(0.07, 12.96) |                       | 3.49<br>(0.06, 20.04) | 3.47<br>(0.17, 18.32) | 3.43<br>(0.29, 16.47) | 3.62<br>(0.26, 17.56) | 10.70<br>(0.05, 67.32) | 8.30<br>(0.07, 50.78) | 7.91<br>(0.14, 50.02) | 5.43<br>(0.21, 30.20) | 3.93<br>(0.35, 18.69) | 5.97<br>(0.40, 29.74) |
|            | LaHdDX  | 0.99<br>(0.28, 2.74)  | 2.76<br>(0.05, 16.10) |                       | 3.47<br>(0.13, 19.10) | 3.45<br>(0.21, 17.47) | 3.59<br>(0.19, 19.06) | 3.08<br>(0.21, 14.32)  | 2.40<br>(0.37, 8.70)  | 8.25<br>(0.10, 52.47) | 5.34<br>(0.15, 30.80) | 3.91<br>(0.27, 20.00) | 5.92<br>(0.31, 31.21) |
|            | ITBUD   | 1.09<br>(0.06, 4.80)  | 1.24<br>(0.05, 6.04)  | 1.57<br>(0.05, 7.89)  |                       | 1.51<br>(0.33, 4.35)  | 1.58<br>(0.29, 5.10)  | 4.92<br>(0.04, 30.35)  | 3.82<br>(0.06, 22.61) | 3.61<br>(0.12, 19.55) | 2.40<br>(0.20, 10.19) | 1.72<br>(0.43, 4.91)  | 2.64<br>(0.46, 8.98)  |
|            | EHC     | 0.75<br>(0.07, 2.77)  | 0.85<br>(0.06, 3.50)  | 1.09<br>(0.06, 4.73)  | 1.03<br>(0.23, 3.07)  |                       | 1.10<br>(0.43, 2.47)  | 3.38<br>(0.05, 19.90)  | 2.63<br>(0.06, 14.32) | 2.52<br>(0.13, 12.30) | 1.67<br>(0.24, 5.91)  | 1.20<br>(0.80, 1.94)  | 1.83<br>(0.65, 4.49)  |
|            | EIFLUT  | 0.80<br>(0.06, 3.13)  | 0.90<br>(0.06, 3.82)  | 1.15<br>(0.05, 5.21)  | 1.08<br>(0.20, 3.40)  | 1.10<br>(0.41, 2.30)  |                       | 3.53<br>(0.04, 21.01)  | 2.76<br>(0.06, 15.02) | 2.65<br>(0.12, 13.20) | 1.76<br>(0.21, 6.62)  | 1.26<br>(0.56, 2.52)  | 1.93<br>(0.54, 5.25)  |
|            | MoMdDX  | 1.05<br>(0.04, 5.33)  | 2.79<br>(0.01, 18.95) | 1.06<br>(0.07, 4.78)  | 3.62<br>(0.03, 23.56) | 3.49<br>(0.05, 21.43) | 3.67<br>(0.05, 23.06) |                        | 1.35<br>(0.23, 4.42)  | 8.56<br>(0.03, 55.49) | 5.73<br>(0.04, 36.79) | 3.98<br>(0.06, 24.61) | 6.01<br>(0.08, 37.42) |
|            | MoHdDX  | 0.78<br>(0.07, 3.28)  | 2.09<br>(0.02, 14.10) | 0.79<br>(0.11, 2.69)  | 2.62<br>(0.04, 16.40) | 2.58<br>(0.07, 15.46) | 2.70<br>(0.07, 16.32) | 1.29<br>(0.23, 4.27)   |                       | 6.03<br>(0.04, 42.23) | 4.08<br>(0.06, 26.88) | 2.94<br>(0.09, 17.79) | 4.44<br>(0.10, 26.62) |
|            | EIBUD   | 1.16<br>(0.02, 6.62)  | 1.28<br>(0.02, 7.37)  | 1.75<br>(0.02, 9.92)  | 1.55<br>(0.05, 8.06)  | 1.59<br>(0.08, 7.49)  | 1.68<br>(0.08, 8.25)  | 5.84<br>(0.02, 32.06)  | 4.42<br>(0.02, 25.42) |                       | 2.54<br>(0.06, 13.98) | 1.83<br>(0.10, 8.48)  | 2.79<br>(0.12, 13.80) |
|            | MoLdDX  | 0.85<br>(0.03, 4.15)  | 0.94<br>(0.03, 4.83)  | 1.23<br>(0.03, 6.48)  | 1.14<br>(0.10, 4.96)  | 1.17<br>(0.17, 4.22)  | 1.23<br>(0.15, 4.78)  | 3.81<br>(0.03, 24.62)  | 2.95<br>(0.04, 17.42) | 2.95<br>(0.07, 16.22) |                       | 1.34<br>(0.21, 4.74)  | 2.05<br>(0.23, 8.19)  |
|            | PLACEBO | 0.62<br>(0.06, 2.18)  | 0.71<br>(0.05, 2.82)  | 0.90<br>(0.05, 3.77)  | 0.85<br>(0.20, 2.34)  | 0.88<br>(0.52, 1.26)  | 0.92<br>(0.40, 1.79)  | 2.74<br>(0.04, 16.37)  | 2.15<br>(0.06, 11.56) | 2.08<br>(0.12, 9.84)  | 1.39<br>(0.21, 4.69)  |                       | 1.52<br>(0.60, 3.29)  |
|            | EIBEC   | 0.49<br>(0.04, 1.92)  | 0.56<br>(0.03, 2.47)  | 0.71<br>(0.03, 3.19)  | 0.68<br>(0.11, 2.19)  | 0.69<br>(0.22, 1.53)  | 0.73<br>(0.19, 1.85)  | 2.18<br>(0.03, 13.15)  | 1.68<br>(0.04, 9.54)  | 1.66<br>(0.07, 8.43)  | 1.10<br>(0.12, 4.32)  | 0.79<br>(0.30, 1.67)  |                       |

**eFigure 50. Direct Evidence from the Pair Wise Comparisons for IVH >II**

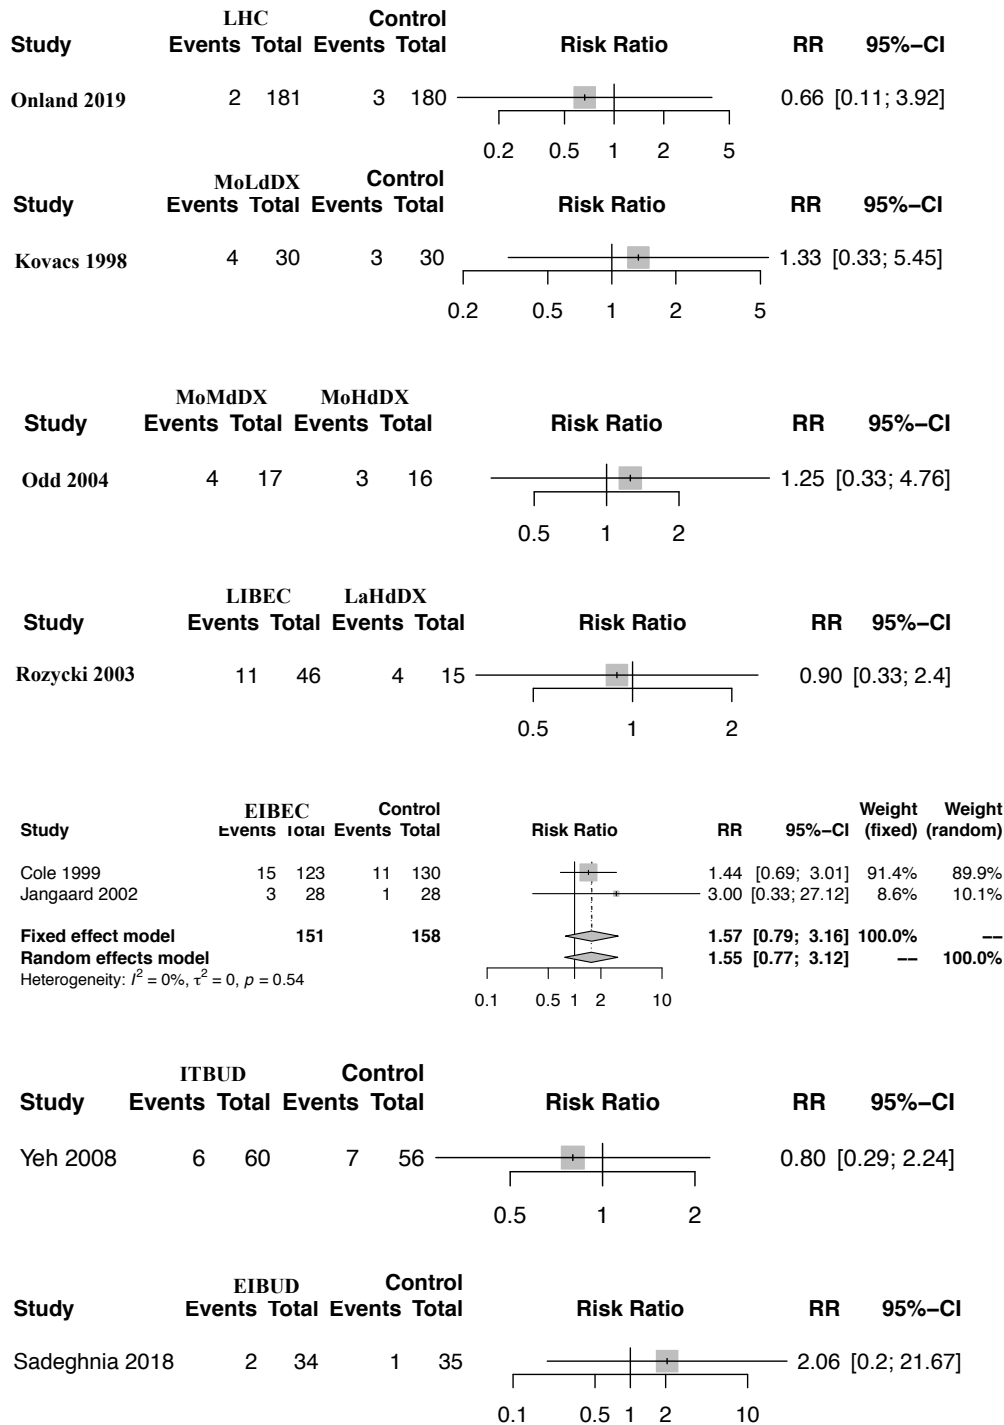



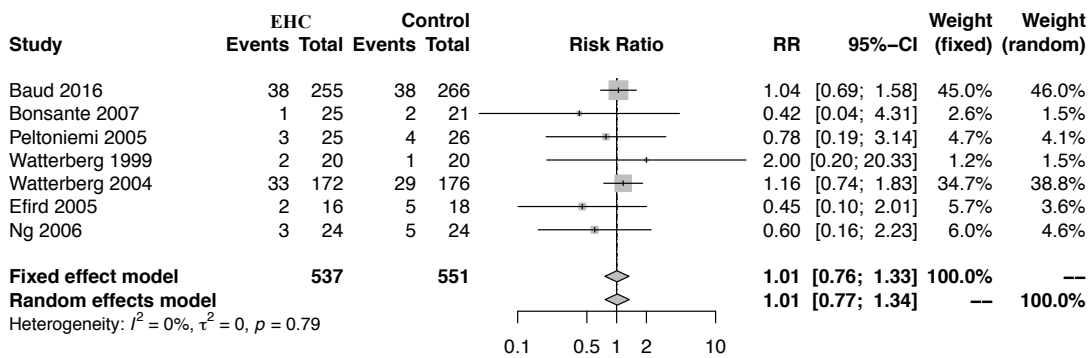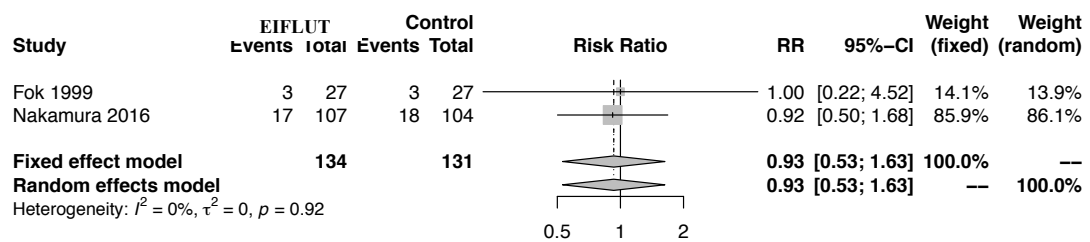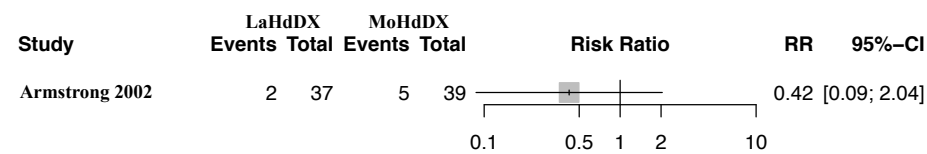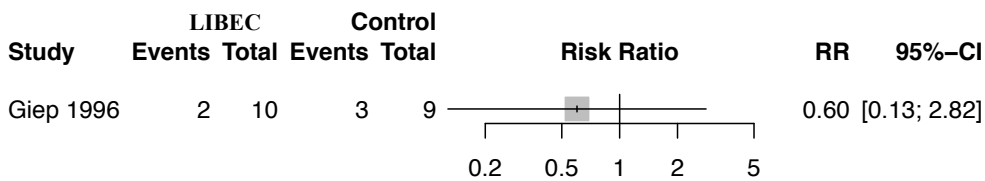

**eFigure 51. Network Plot (A), SUCRA Plot with SUCRA Values (%) (B), and Forest Plot Depicting the Network Estimates [RR (95% CrI)] of the Various Interventions with “Placebo” as the Common Comparator for PVL (C)**

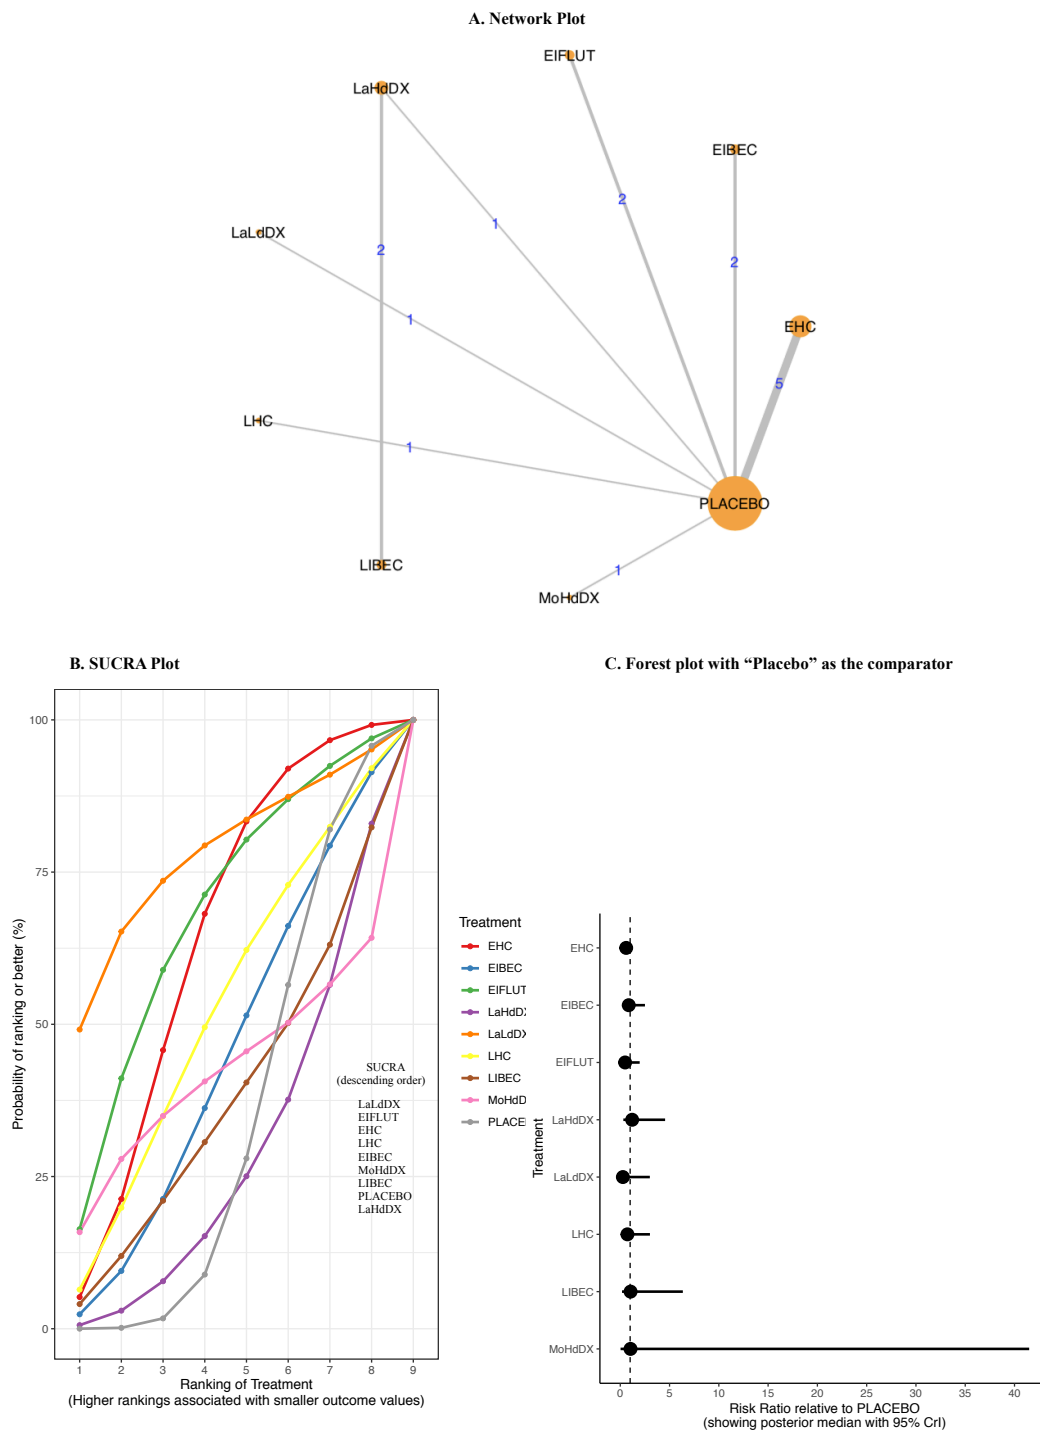

**eFigure 52. League Plot Depicting the Network Estimates [RR (95% CrI)] of Postnatal Corticosteroids Comparisons for PVL**

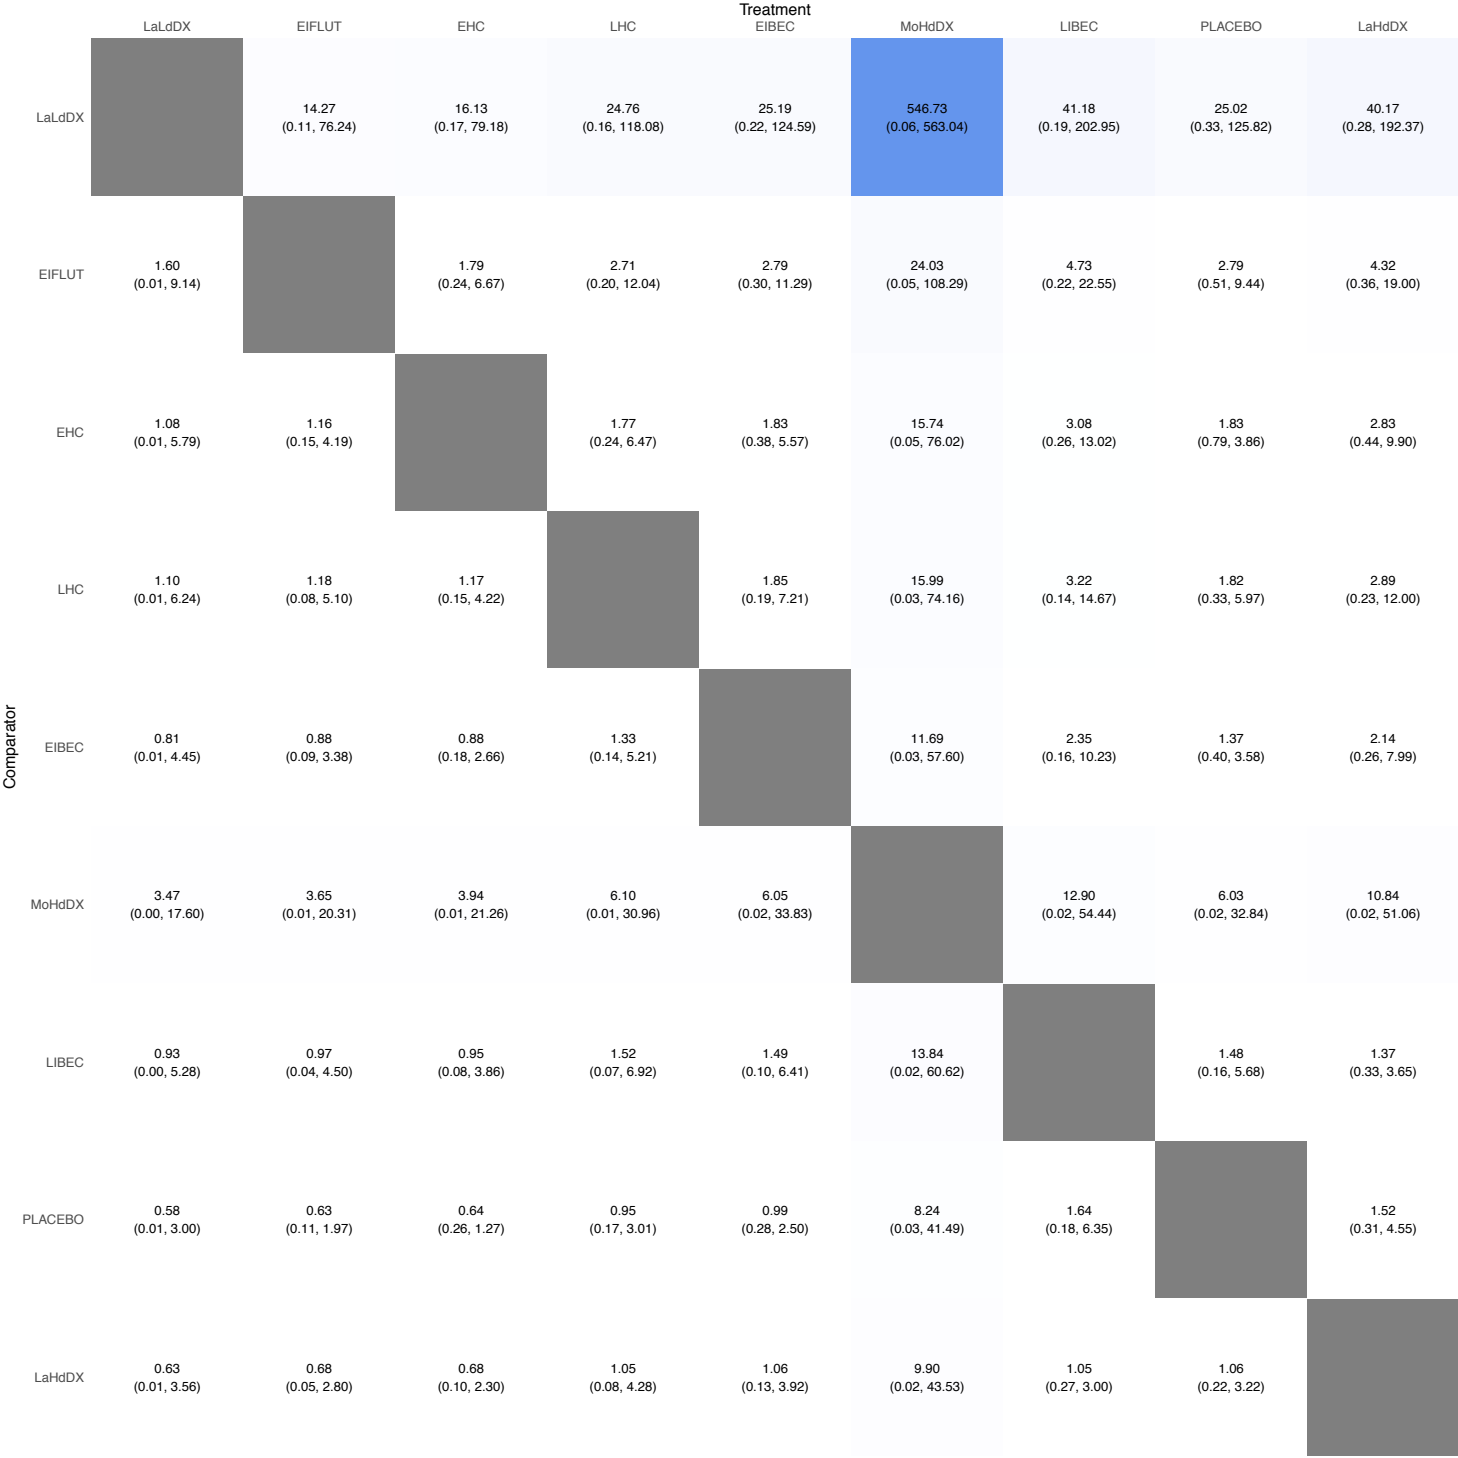

**eFigure 53. Direct Evidence from the Pair Wise Comparisons for PVL**

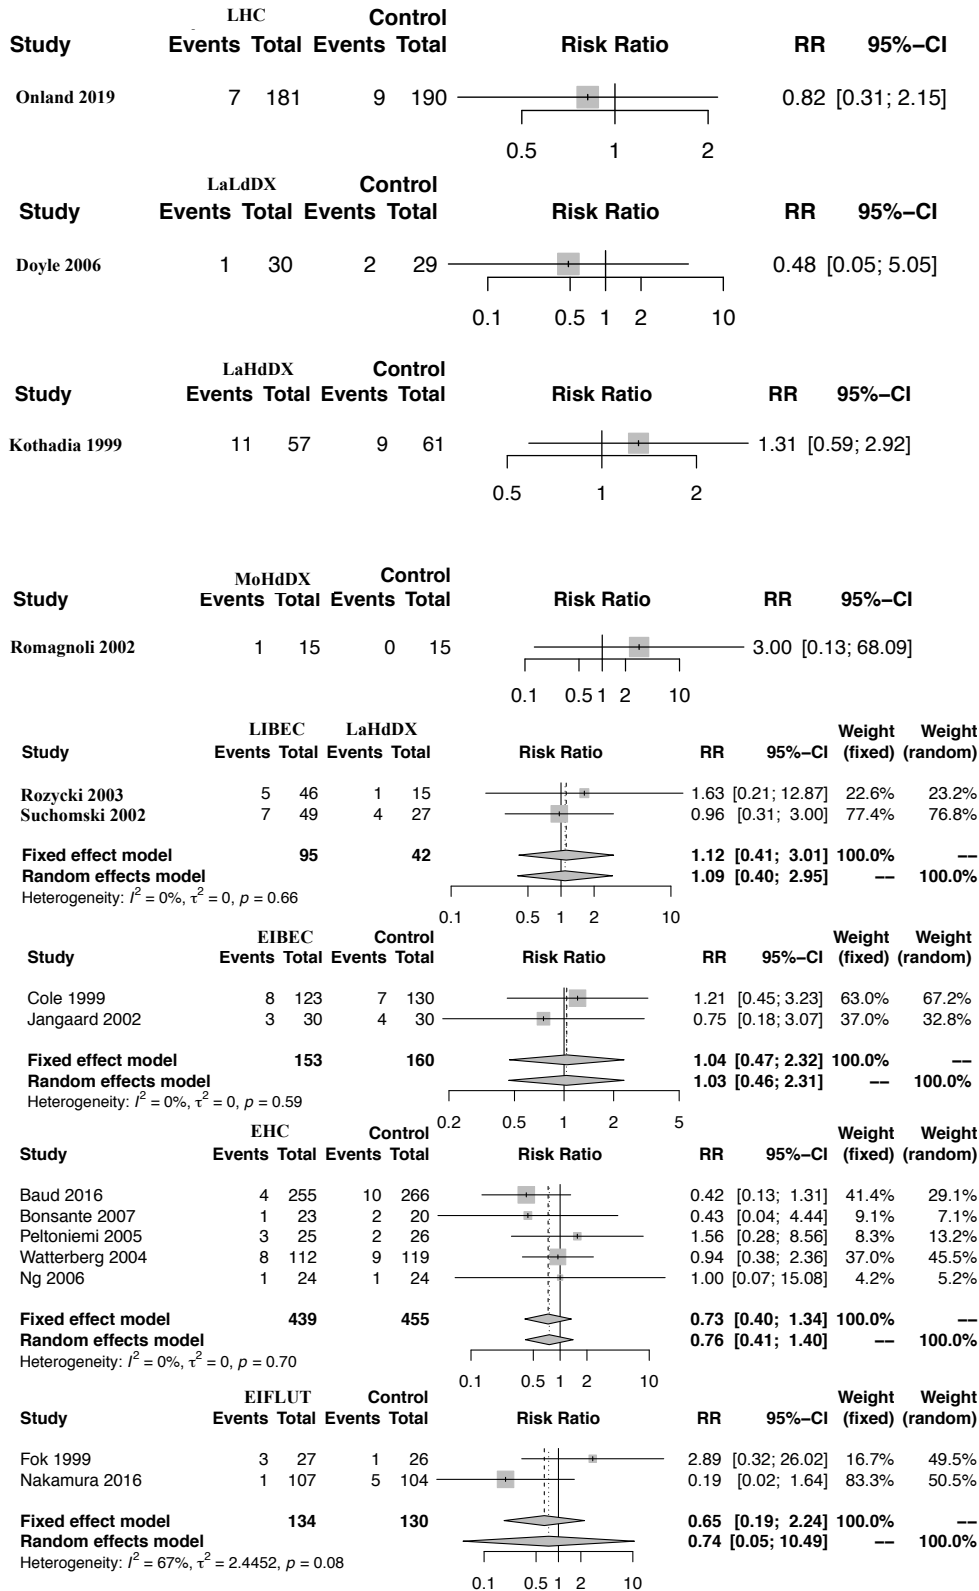

**eFigure 54. Network Plot (A), SUCRA Plot with SUCRA Values (%) (B), and Forest Plot Depicting the Network Estimates [RR (95% CrI)] of the Various Interventions with “Placebo” as the Common Comparator for CP (C)**

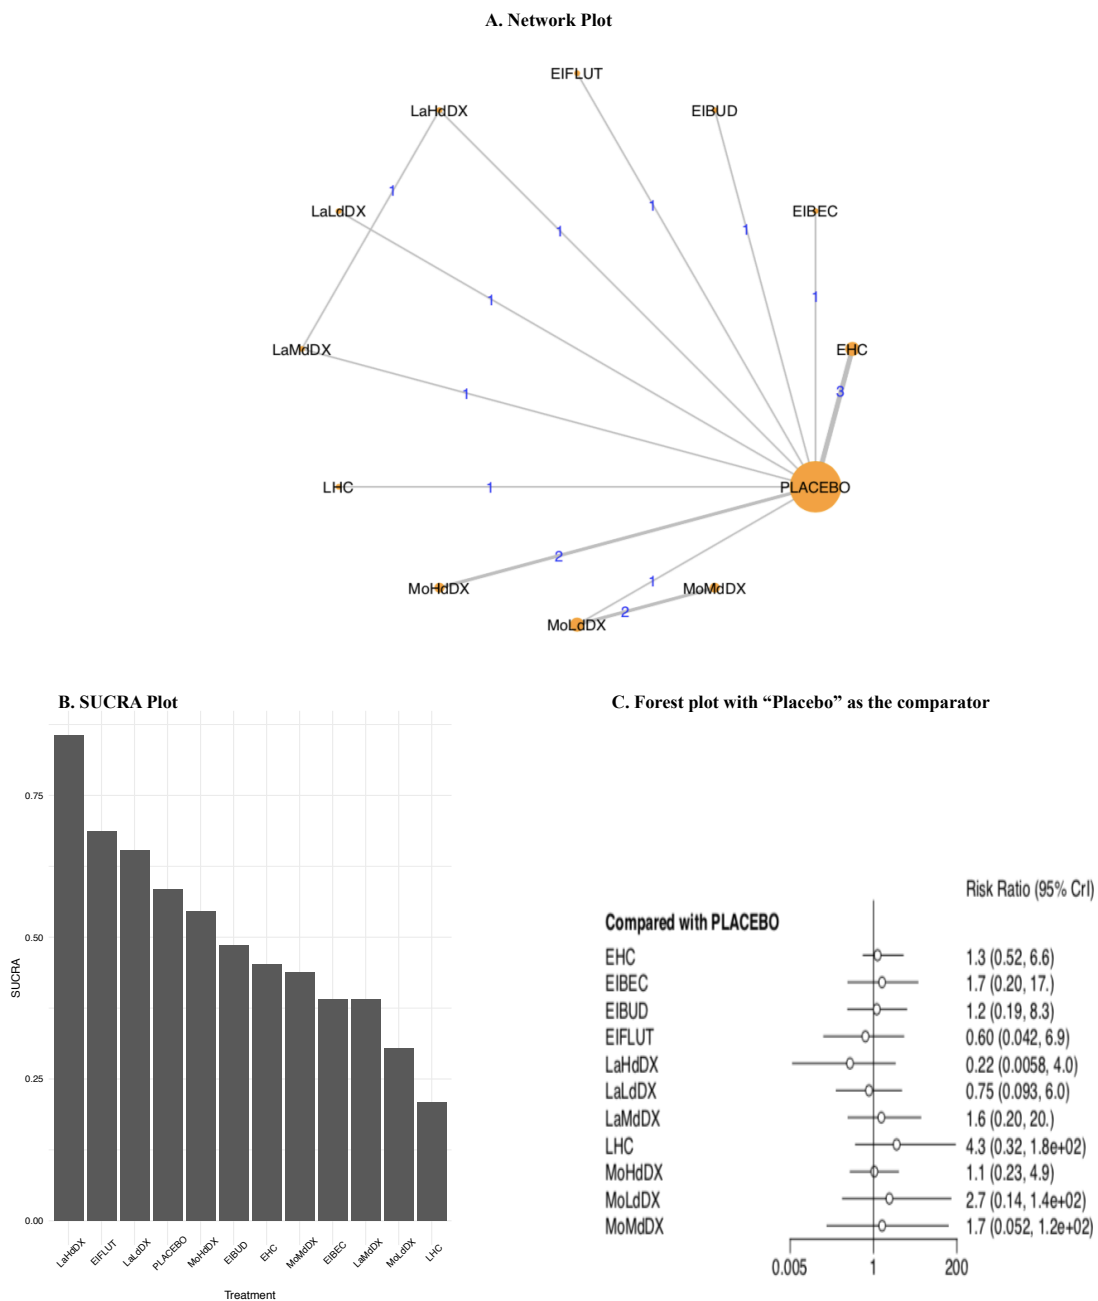

**eFigure 55. League Plot Depicting the Network Estimates [RR (95% CrI)] of Postnatal Corticosteroids Comparisons for CP**

|                       |                        |                       |                        |                      |                       |                        |                         |                        |                         |                         |                        |
|-----------------------|------------------------|-----------------------|------------------------|----------------------|-----------------------|------------------------|-------------------------|------------------------|-------------------------|-------------------------|------------------------|
| <b>EHC</b>            | 1.31<br>(0.08, 13.99)  | 0.96<br>(0.07, 6.33)  | 0.45<br>(0.02, 5.57)   | 0.16 (0, 3.3)        | 0.57<br>(0.04, 4.66)  | 1.26<br>(0.08, 16.2)   | 3.24<br>(0.14, 141.56)  | 0.81<br>(0.08, 4.28)   | 2.03<br>(0.06, 109.61)  | 1.29<br>(0.03, 87.89)   | 0.78<br>(0.15, 1.94)   |
| 0.76<br>(0.07, 12.93) | <b>EIBEC</b>           | 0.71<br>(0.04, 12.73) | 0.34<br>(0.01, 9.28)   | 0.13 (0, 4.7)        | 0.43<br>(0.02, 8.74)  | 0.97<br>(0.04, 24.31)  | 2.62<br>(0.08, 174.82)  | 0.61<br>(0.04, 8.86)   | 1.61<br>(0.04, 139.31)  | 1.01<br>(0.02, 116.61)  | 0.58<br>(0.06, 5.1)    |
| 1.04<br>(0.16, 13.91) | 1.4<br>(0.08, 25.59)   | <b>EIBUD</b>          | 0.48<br>(0.02, 9.84)   | 0.18 (0, 5.03)       | 0.62<br>(0.04, 9.59)  | 1.35<br>(0.08, 29.22)  | 3.57<br>(0.15, 216.15)  | 0.86<br>(0.08, 9.25)   | 2.26<br>(0.06, 163.22)  | 1.44<br>(0.03, 134.2)   | 0.82<br>(0.12, 5.17)   |
| 2.24<br>(0.18, 54.06) | 2.98<br>(0.11, 97.19)  | 2.08<br>(0.1, 52.91)  | <b>EIFLUT</b>          | 0.37 (0, 18.75)      | 1.26<br>(0.05, 33.67) | 2.87<br>(0.11, 106.07) | 7.68<br>(0.21, 666.45)  | 1.78<br>(0.1, 37.84)   | 4.82<br>(0.1, 494.94)   | 3.01<br>(0.04, 419.26)  | 1.68<br>(0.15, 23.74)  |
| 6.08<br>(0.3, 322.87) | 7.81<br>(0.21, 581.16) | 5.54<br>(0.2, 320.54) | 2.73<br>(0.05, 210.57) | <b>LaHdDX</b>        | 3.36<br>(0.1, 205.83) | 7.28<br>(0.64, 263.38) | 21.47<br>(0.4, 3315.55) | 4.77<br>(0.19, 234.04) | 13.02<br>(0.2, 2461.42) | 8.23<br>(0.09, 1903.63) | 4.48<br>(0.25, 172.41) |
| 1.75<br>(0.21, 26.85) | 2.31<br>(0.11, 48.94)  | 1.62<br>(0.1, 26.39)  | 0.79<br>(0.03, 18.5)   | 0.3 (0, 9.81)        | <b>LaLdDX</b>         | 2.25<br>(0.12, 53.69)  | 5.97<br>(0.22, 409.95)  | 1.42<br>(0.1, 18.5)    | 3.68<br>(0.1, 311.49)   | 2.36<br>(0.04, 246.75)  | 1.34<br>(0.17, 10.72)  |
| 0.79<br>(0.06, 12.92) | 1.03<br>(0.04, 23.99)  | 0.74<br>(0.03, 12.59) | 0.35<br>(0.01, 9.33)   | 0.14 (0, 1.56)       | 0.44<br>(0.02, 8.49)  | <b>LaMdDX</b>          | 2.59<br>(0.07, 189.1)   | 0.63<br>(0.04, 8.45)   | 1.62<br>(0.04, 139.63)  | 1.01<br>(0.01, 111.4)   | 0.61<br>(0.05, 5.05)   |
| 0.31<br>(0.01, 6.99)  | 0.38<br>(0.01, 12.47)  | 0.28 (0, 6.61)        | 0.13 (0, 4.84)         | 0.05 (0, 2.53)       | 0.17 (0, 4.54)        | 0.39<br>(0.01, 13.47)  | <b>LHC</b>              | 0.24 (0, 5.02)         | 0.61<br>(0.01, 66.35)   | 0.38 (0, 52.66)         | 0.23<br>(0.01, 3.14)   |
| 1.24<br>(0.23, 12.95) | 1.64<br>(0.11, 24.48)  | 1.16<br>(0.11, 12.95) | 0.56<br>(0.03, 10.23)  | 0.21 (0, 5.29)       | 0.71<br>(0.05, 9.53)  | 1.59<br>(0.12, 28.21)  | 4.18<br>(0.2, 223.69)   | <b>MoHdDX</b>          | 2.63<br>(0.09, 166.22)  | 1.64<br>(0.03, 143.16)  | 0.95<br>(0.2, 4.41)    |
| 0.49<br>(0.01, 15.69) | 0.62<br>(0.01, 27.75)  | 0.44<br>(0.01, 15.59) | 0.21 (0, 10.05)        | 0.08 (0, 5.07)       | 0.27 (0, 10.43)       | 0.62<br>(0.01, 27.68)  | 1.64<br>(0.02, 179.62)  | 0.38<br>(0.01, 10.92)  | <b>MoLdDX</b>           | 0.63<br>(0.1, 3.36)     | 0.37<br>(0.01, 7.21)   |
| 0.77<br>(0.01, 39.55) | 0.99<br>(0.01, 62.67)  | 0.69<br>(0.01, 37.65) | 0.33 (0, 24.65)        | 0.12 (0, 11.76)      | 0.42 (0, 24.45)       | 0.99<br>(0.01, 68.99)  | 2.64<br>(0.02, 394.52)  | 0.61<br>(0.01, 28.98)  | 1.6 (0.3, 9.73)         | <b>MoMdDX</b>           | 0.58<br>(0.01, 19.33)  |
| 1.29<br>(0.52, 6.59)  | 1.72<br>(0.2, 16.84)   | 1.22<br>(0.19, 8.25)  | 0.6<br>(0.04, 6.85)    | 0.22<br>(0.01, 3.99) | 0.75<br>(0.09, 5.97)  | 1.64<br>(0.2, 20.21)   | 4.33<br>(0.32, 181.96)  | 1.05<br>(0.23, 4.89)   | 2.74<br>(0.14, 137.42)  | 1.72<br>(0.05, 115.9)   | <b>PLACEBO</b>         |

**eFigure 56. Direct Evidence from the Pair Wise Comparisons for CP**

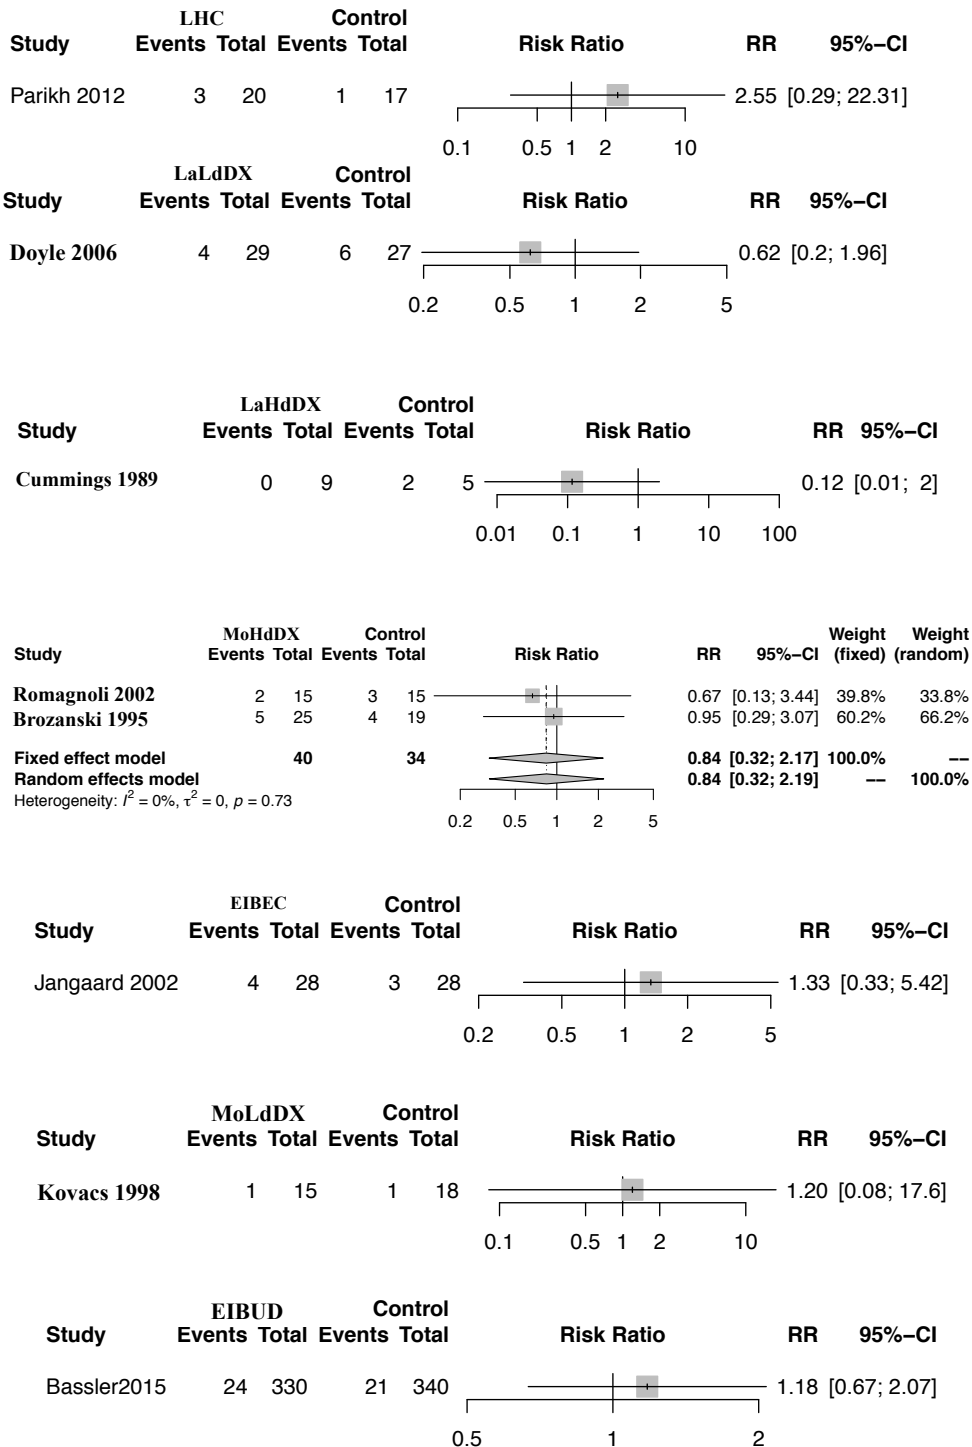

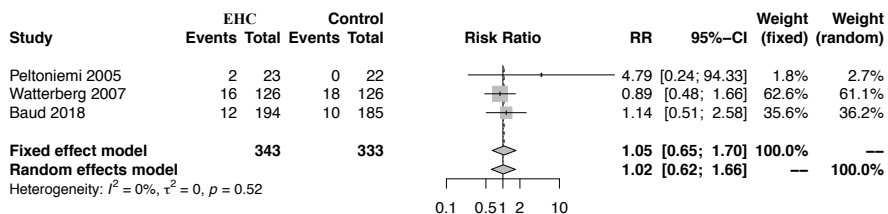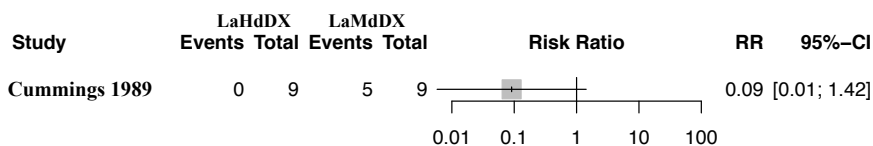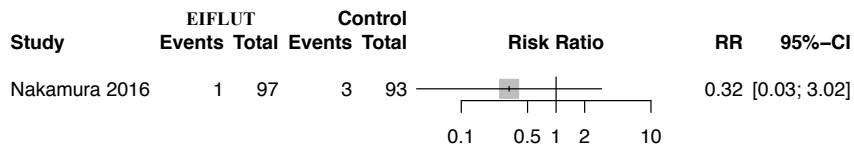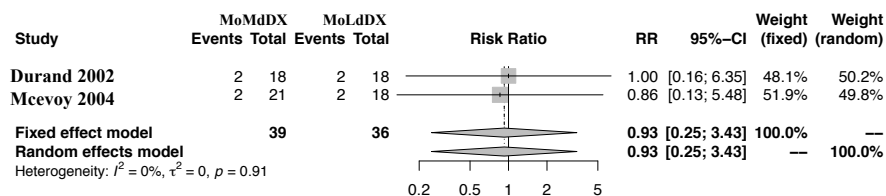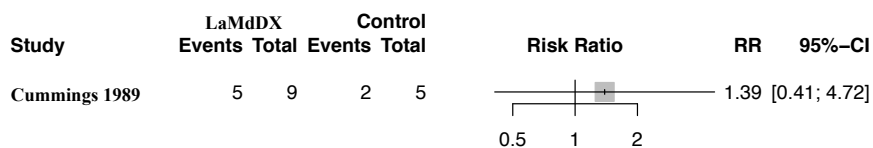



# eFigure 57. League Plot Depicting the Network Estimates [RR (95% CrI)] of Postnatal Corticosteroids Comparisons for Sensitivity Analysis - Duration of Course of Dexamethasone

| Comparator | Treatment                |                      |                          |                      |                      |                          |                          |                      |                      |                      |                      |                      |                          |                      |                      |                      |                      |                          |                          |
|------------|--------------------------|----------------------|--------------------------|----------------------|----------------------|--------------------------|--------------------------|----------------------|----------------------|----------------------|----------------------|----------------------|--------------------------|----------------------|----------------------|----------------------|----------------------|--------------------------|--------------------------|
|            | MoMdScDEX                | MoMdlcDEX            | MoHdlcDEX                | MoMdMcDEX            | MoHdMcDEX            | LaHdlcDEX                | ITBUD                    | EIFLUT               | EIBUD                | LaMcMcDEX            | LIBUD                | LIBEC                | EHC                      | MoLdScDEX            | LaLdMcDEX            | EIBEC                | LaMdLcDEX            | LHC                      | PLACEBO                  |
| MoMdScDEX  |                          | 1.20<br>(0.47, 2.50) | 1.29<br>(0.63, 2.37)     | 1.30<br>(0.63, 2.42) | 1.37<br>(0.61, 2.71) | 1.40<br>(0.75, 2.48)     | 1.43<br>(0.76, 2.51)     | 1.47<br>(0.77, 2.63) | 1.49<br>(0.76, 2.65) | 1.56<br>(0.68, 3.07) | 1.56<br>(0.67, 3.05) | 1.61<br>(0.82, 3.00) | 1.60<br>(0.89, 2.73)     | 1.66<br>(0.85, 2.97) | 1.89<br>(0.92, 3.57) | 1.88<br>(0.94, 3.46) | 2.03<br>(0.98, 3.86) | **2.01**<br>(1.07, 3.57) | **1.98**<br>(1.16, 3.29) |
| MoMdlcDEX  | 1.00<br>(0.40, 2.13)     |                      | 1.16<br>(0.65, 1.97)     | 1.18<br>(0.59, 2.20) | 1.28<br>(0.51, 2.76) | 1.31<br>(0.61, 2.57)     | 1.34<br>(0.62, 2.63)     | 1.37<br>(0.62, 2.72) | 1.39<br>(0.62, 2.73) | 1.45<br>(0.56, 3.12) | 1.45<br>(0.56, 3.09) | 1.50<br>(0.67, 3.11) | 1.49<br>(0.71, 2.85)     | 1.56<br>(0.67, 3.18) | 1.76<br>(0.75, 3.70) | 1.75<br>(0.77, 3.58) | 1.88<br>(0.85, 3.86) | 1.88<br>(0.86, 3.74)     | 1.85<br>(0.92, 3.47)     |
| MoHdlcDEX  | 0.87<br>(0.42, 1.58)     | 0.93<br>(0.51, 1.53) |                          | 1.02<br>(0.69, 1.48) | 1.11<br>(0.53, 2.06) | 1.13<br>(0.67, 1.85)     | 1.16<br>(0.68, 1.87)     | 1.19<br>(0.68, 1.96) | 1.21<br>(0.67, 1.96) | 1.26<br>(0.59, 2.33) | 1.26<br>(0.58, 2.31) | 1.30<br>(0.73, 2.27) | 1.30<br>(0.79, 2.01)     | 1.35<br>(0.73, 2.31) | 1.53<br>(0.80, 2.73) | 1.52<br>(0.83, 2.61) | 1.64<br>(0.89, 2.89) | 1.63<br>(0.95, 2.69)     | **1.60**<br>(1.05, 2.41) |
| MoMdMcDEX  | 0.87<br>(0.41, 1.60)     | 0.95<br>(0.45, 1.70) | 1.01<br>(0.68, 1.46)     |                      | 1.11<br>(0.51, 2.11) | 1.14<br>(0.64, 1.91)     | 1.16<br>(0.65, 1.93)     | 1.19<br>(0.65, 2.02) | 1.21<br>(0.65, 2.02) | 1.26<br>(0.57, 2.39) | 1.26<br>(0.56, 2.37) | 1.31<br>(0.70, 2.34) | 1.30<br>(0.76, 2.08)     | 1.35<br>(0.73, 2.29) | 1.53<br>(0.77, 2.79) | 1.52<br>(0.80, 2.67) | 1.64<br>(0.85, 2.98) | 1.63<br>(0.91, 2.76)     | 1.60<br>(0.99, 2.50)     |
| MoHdMcDEX  | 0.84<br>(0.37, 1.65)     | 0.94<br>(0.36, 1.98) | 1.01<br>(0.49, 1.88)     | 1.02<br>(0.47, 1.94) |                      | 1.09<br>(0.62, 1.79)     | 1.12<br>(0.59, 1.98)     | 1.16<br>(0.59, 2.07) | 1.17<br>(0.58, 2.07) | 1.23<br>(0.52, 2.42) | 1.22<br>(0.52, 2.39) | 1.25<br>(0.67, 2.24) | 1.26<br>(0.68, 2.14)     | 1.32<br>(0.61, 2.53) | 1.49<br>(0.70, 2.81) | 1.48<br>(0.72, 2.73) | 1.59<br>(0.77, 3.00) | 1.58<br>(0.82, 2.83)     | 1.55<br>(0.88, 2.59)     |
| LaHdlcDEX  | 0.78<br>(0.40, 1.34)     | 0.87<br>(0.39, 1.64) | 0.94<br>(0.54, 1.50)     | 0.95<br>(0.52, 1.57) | 0.99<br>(0.56, 1.61) |                          | 1.04<br>(0.67, 1.55)     | 1.07<br>(0.67, 1.63) | 1.09<br>(0.66, 1.63) | 1.14<br>(0.57, 1.98) | 1.14<br>(0.56, 1.96) | 1.16<br>(0.84, 1.62) | 1.17<br>(0.79, 1.64)     | 1.23<br>(0.67, 2.04) | 1.38<br>(0.78, 2.28) | 1.37<br>(0.81, 2.18) | 1.47<br>(0.88, 2.36) | 1.47<br>(0.94, 2.22)     | **1.44**<br>(1.06, 1.94) |
| ITBUD      | 0.77<br>(0.40, 1.31)     | 0.86<br>(0.38, 1.62) | 0.92<br>(0.53, 1.46)     | 0.93<br>(0.52, 1.53) | 0.98<br>(0.50, 1.70) | 1.00<br>(0.65, 1.49)     |                          | 1.05<br>(0.66, 1.57) | 1.07<br>(0.65, 1.58) | 1.11<br>(0.56, 1.92) | 1.11<br>(0.55, 1.91) | 1.15<br>(0.70, 1.85) | 1.14<br>(0.78, 1.59)     | 1.20<br>(0.67, 1.99) | 1.35<br>(0.77, 2.22) | 1.34<br>(0.80, 2.12) | 1.45<br>(0.83, 2.42) | 1.43<br>(0.93, 2.16)     | **1.41**<br>(1.05, 1.87) |
| EIFLUT     | 0.75<br>(0.38, 1.30)     | 0.84<br>(0.37, 1.61) | 0.90<br>(0.51, 1.47)     | 0.91<br>(0.49, 1.53) | 0.96<br>(0.48, 1.71) | 0.98<br>(0.61, 1.50)     | 1.00<br>(0.64, 1.51)     |                      | 1.04<br>(0.62, 1.60) | 1.09<br>(0.54, 1.93) | 1.09<br>(0.53, 1.91) | 1.13<br>(0.67, 1.86) | 1.12<br>(0.74, 1.61)     | 1.18<br>(0.64, 1.99) | 1.32<br>(0.74, 2.23) | 1.31<br>(0.78, 2.13) | 1.42<br>(0.79, 2.43) | 1.41<br>(0.88, 2.18)     | 1.38<br>(0.99, 1.92)     |
| EIBUD      | 0.74<br>(0.38, 1.31)     | 0.83<br>(0.37, 1.61) | 0.89<br>(0.51, 1.49)     | 0.90<br>(0.49, 1.55) | 0.94<br>(0.48, 1.71) | 0.97<br>(0.61, 1.53)     | 0.99<br>(0.63, 1.53)     | 1.01<br>(0.63, 1.61) |                      | 1.05<br>(0.66, 1.58) | 1.04<br>(0.66, 1.56) | 1.11<br>(0.66, 1.91) | 1.10<br>(0.74, 1.63)     | 1.16<br>(0.64, 2.00) | 1.30<br>(0.74, 2.28) | 1.30<br>(0.76, 2.16) | 1.40<br>(0.79, 2.48) | 1.39<br>(0.88, 2.22)     | 1.36<br>(0.99, 1.95)     |
| LaMcMcDEX  | 0.74<br>(0.33, 1.47)     | 0.83<br>(0.32, 1.77) | 0.89<br>(0.43, 1.69)     | 0.90<br>(0.42, 1.75) | 0.95<br>(0.41, 1.91) | 0.97<br>(0.50, 1.76)     | 0.99<br>(0.52, 1.79)     | 1.02<br>(0.52, 1.85) | 1.00<br>(0.63, 1.50) |                      | 1.02<br>(0.68, 1.45) | 1.12<br>(0.56, 2.17) | 1.10<br>(0.60, 1.92)     | 1.16<br>(0.54, 2.25) | 1.31<br>(0.62, 2.56) | 1.30<br>(0.64, 2.46) | 1.41<br>(0.67, 2.80) | 1.39<br>(0.72, 2.57)     | 1.37<br>(0.78, 2.34)     |
| LIBUD      | 0.74<br>(0.33, 1.49)     | 0.83<br>(0.32, 1.79) | 0.89<br>(0.43, 1.71)     | 0.90<br>(0.42, 1.77) | 0.95<br>(0.42, 1.93) | 0.97<br>(0.51, 1.79)     | 0.99<br>(0.52, 1.81)     | 1.02<br>(0.52, 1.88) | 1.00<br>(0.64, 1.52) | 1.02<br>(0.69, 1.48) |                      | 1.12<br>(0.56, 2.20) | 1.11<br>(0.61, 1.95)     | 1.17<br>(0.55, 2.28) | 1.31<br>(0.63, 2.60) | 1.30<br>(0.64, 2.49) | 1.41<br>(0.67, 2.84) | 1.39<br>(0.73, 2.60)     | 1.37<br>(0.79, 2.38)     |
| LIBEC      | 0.69<br>(0.33, 1.22)     | 0.77<br>(0.32, 1.49) | 0.83<br>(0.44, 1.37)     | 0.84<br>(0.43, 1.43) | 0.88<br>(0.45, 1.50) | 0.89<br>(0.62, 1.18)     | 0.92<br>(0.54, 1.42)     | 0.95<br>(0.54, 1.50) | 0.97<br>(0.52, 1.51) | 1.01<br>(0.46, 1.79) | 1.01<br>(0.45, 1.78) |                      | 1.03<br>(0.63, 1.53)     | 1.09<br>(0.55, 1.86) | 1.22<br>(0.63, 2.07) | 1.21<br>(0.66, 2.00) | 1.30<br>(0.71, 2.16) | 1.30<br>(0.75, 2.03)     | 1.28<br>(0.84, 1.82)     |
| EHC        | 0.68<br>(0.37, 1.12)     | 0.76<br>(0.35, 1.40) | 0.82<br>(0.50, 1.26)     | 0.82<br>(0.48, 1.32) | 0.87<br>(0.47, 1.47) | 0.89<br>(0.61, 1.27)     | 0.90<br>(0.63, 1.27)     | 0.93<br>(0.62, 1.35) | 0.94<br>(0.61, 1.35) | 0.99<br>(0.52, 1.67) | 0.98<br>(0.51, 1.65) | 1.02<br>(0.65, 1.60) |                          | 1.06<br>(0.62, 1.71) | 1.19<br>(0.72, 1.92) | 1.19<br>(0.75, 1.82) | 1.28<br>(0.77, 2.09) | 1.27<br>(0.87, 1.84)     | **1.25**<br>(1.02, 1.55) |
| MoLdScDEX  | 0.67<br>(0.34, 1.17)     | 0.75<br>(0.31, 1.48) | 0.81<br>(0.43, 1.37)     | 0.81<br>(0.44, 1.37) | 0.86<br>(0.40, 1.64) | 0.88<br>(0.49, 1.48)     | 0.90<br>(0.50, 1.50)     | 0.92<br>(0.50, 1.57) | 0.94<br>(0.50, 1.57) | 0.98<br>(0.44, 1.85) | 0.98<br>(0.44, 1.83) | 1.01<br>(0.54, 1.81) | 1.01<br>(0.58, 1.62)     |                      | 1.19<br>(0.60, 2.16) | 1.18<br>(0.62, 2.08) | 1.28<br>(0.65, 2.35) | 1.26<br>(0.70, 2.15)     | 1.24<br>(0.77, 1.94)     |
| LaLdMcDEX  | 0.60<br>(0.28, 1.09)     | 0.67<br>(0.27, 1.33) | 0.72<br>(0.37, 1.24)     | 0.72<br>(0.36, 1.29) | 0.76<br>(0.36, 1.42) | 0.78<br>(0.44, 1.28)     | 0.80<br>(0.45, 1.30)     | 0.82<br>(0.45, 1.36) | 0.83<br>(0.44, 1.35) | 0.87<br>(0.39, 1.61) | 0.86<br>(0.38, 1.59) | 0.90<br>(0.48, 1.58) | 0.89<br>(0.52, 1.39)     | 0.93<br>(0.46, 1.67) |                      | 1.04<br>(0.55, 1.80) | 1.13<br>(0.58, 2.04) | 1.12<br>(0.63, 1.86)     | 1.10<br>(0.69, 1.68)     |
| EIBEC      | 0.59<br>(0.29, 1.06)     | 0.66<br>(0.28, 1.30) | 0.71<br>(0.38, 1.20)     | 0.72<br>(0.37, 1.25) | 0.76<br>(0.37, 1.38) | 0.78<br>(0.46, 1.23)     | 0.79<br>(0.47, 1.25)     | 0.81<br>(0.47, 1.31) | 0.83<br>(0.46, 1.32) | 0.86<br>(0.41, 1.57) | 0.86<br>(0.40, 1.55) | 0.89<br>(0.50, 1.51) | 0.89<br>(0.55, 1.34)     | 0.93<br>(0.48, 1.63) | 1.05<br>(0.56, 1.82) |                      | 1.12<br>(0.60, 1.97) | 1.11<br>(0.65, 1.78)     | 1.09<br>(0.72, 1.60)     |
| LaMdLcDEX  | 0.56<br>(0.26, 1.02)     | 0.62<br>(0.26, 1.18) | 0.67<br>(0.35, 1.13)     | 0.67<br>(0.34, 1.18) | 0.71<br>(0.33, 1.30) | 0.72<br>(0.42, 1.13)     | 0.74<br>(0.41, 1.21)     | 0.76<br>(0.41, 1.26) | 0.78<br>(0.40, 1.27) | 0.81<br>(0.36, 1.49) | 0.81<br>(0.35, 1.48) | 0.83<br>(0.46, 1.40) | 0.83<br>(0.48, 1.30)     | 0.87<br>(0.43, 1.55) | 0.98<br>(0.49, 1.73) | 0.98<br>(0.51, 1.68) |                      | 1.04<br>(0.58, 1.72)     | 1.03<br>(0.63, 1.56)     |
| LHC        | **0.55**<br>(0.28, 0.94) | 0.61<br>(0.27, 1.16) | 0.66<br>(0.37, 1.05)     | 0.66<br>(0.36, 1.10) | 0.70<br>(0.35, 1.22) | 0.71<br>(0.45, 1.07)     | 0.73<br>(0.46, 1.08)     | 0.75<br>(0.46, 1.14) | 0.76<br>(0.45, 1.13) | 0.80<br>(0.39, 1.38) | 0.79<br>(0.38, 1.37) | 0.82<br>(0.49, 1.33) | 0.82<br>(0.54, 1.14)     | 0.86<br>(0.47, 1.43) | 0.96<br>(0.54, 1.60) | 0.96<br>(0.56, 1.53) | 1.03<br>(0.58, 1.73) |                          | 1.01<br>(0.73, 1.36)     |
| PLACEBO    | **0.54**<br>(0.30, 0.86) | 0.61<br>(0.29, 1.09) | **0.65**<br>(0.42, 0.95) | 0.66<br>(0.40, 1.01) | 0.69<br>(0.39, 1.13) | **0.71**<br>(0.52, 0.94) | **0.72**<br>(0.53, 0.95) | 0.74<br>(0.52, 1.01) | 0.76<br>(0.51, 1.01) | 0.79<br>(0.43, 1.28) | 0.79<br>(0.42, 1.27) | 0.81<br>(0.55, 1.20) | **0.81**<br>(0.64, 0.98) | 0.85<br>(0.51, 1.31) | 0.96<br>(0.60, 1.45) | 0.95<br>(0.63, 1.38) | 1.03<br>(0.64, 1.58) | 1.02<br>(0.74, 1.37)     |                          |

# eFigure 58. Split Between Direct and Indirect Evidence for Duration of Course of Dexamethasone

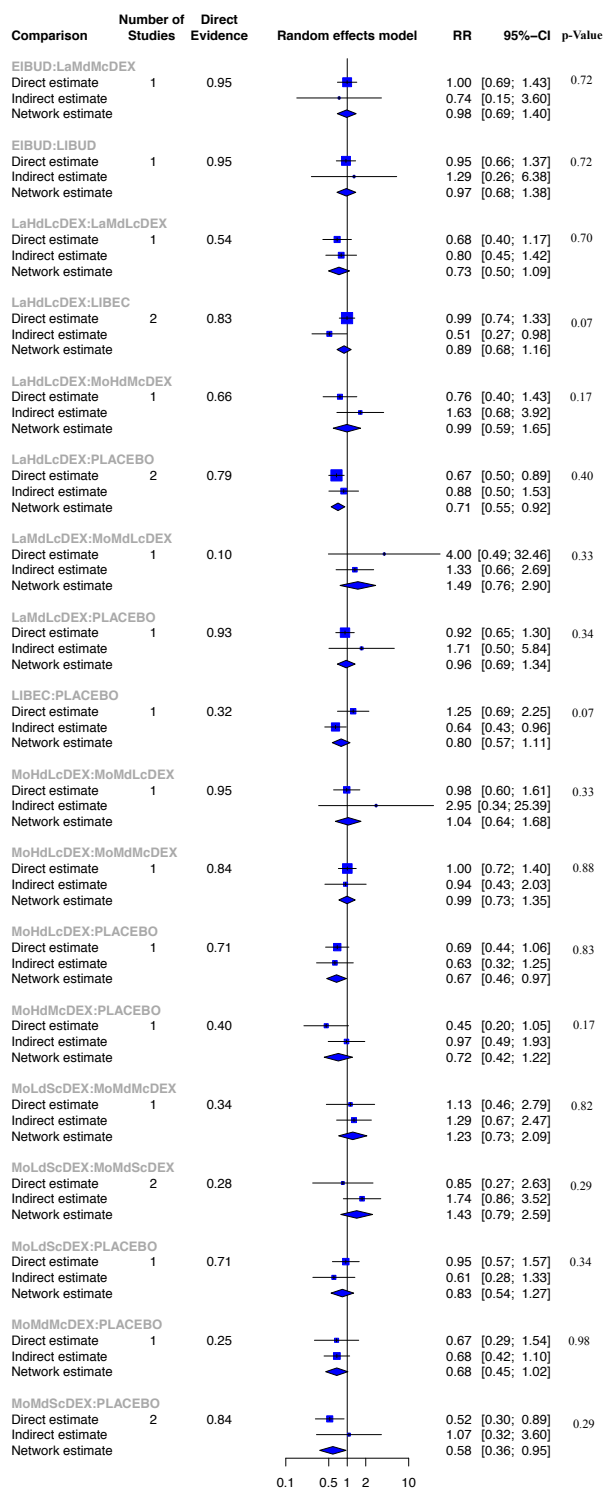

**eFigure 59. Network Plot (A), SUCRA Plot with SUCRA Values (%) (B), and Forest Plot Depicting the Network Estimates [RR (95% CrI)] of the Various Interventions with “Placebo” as the Common Comparator for Sensitivity Analysis Excluding Trials with Antenatal Corticosteroid Coverage <70% (C)**

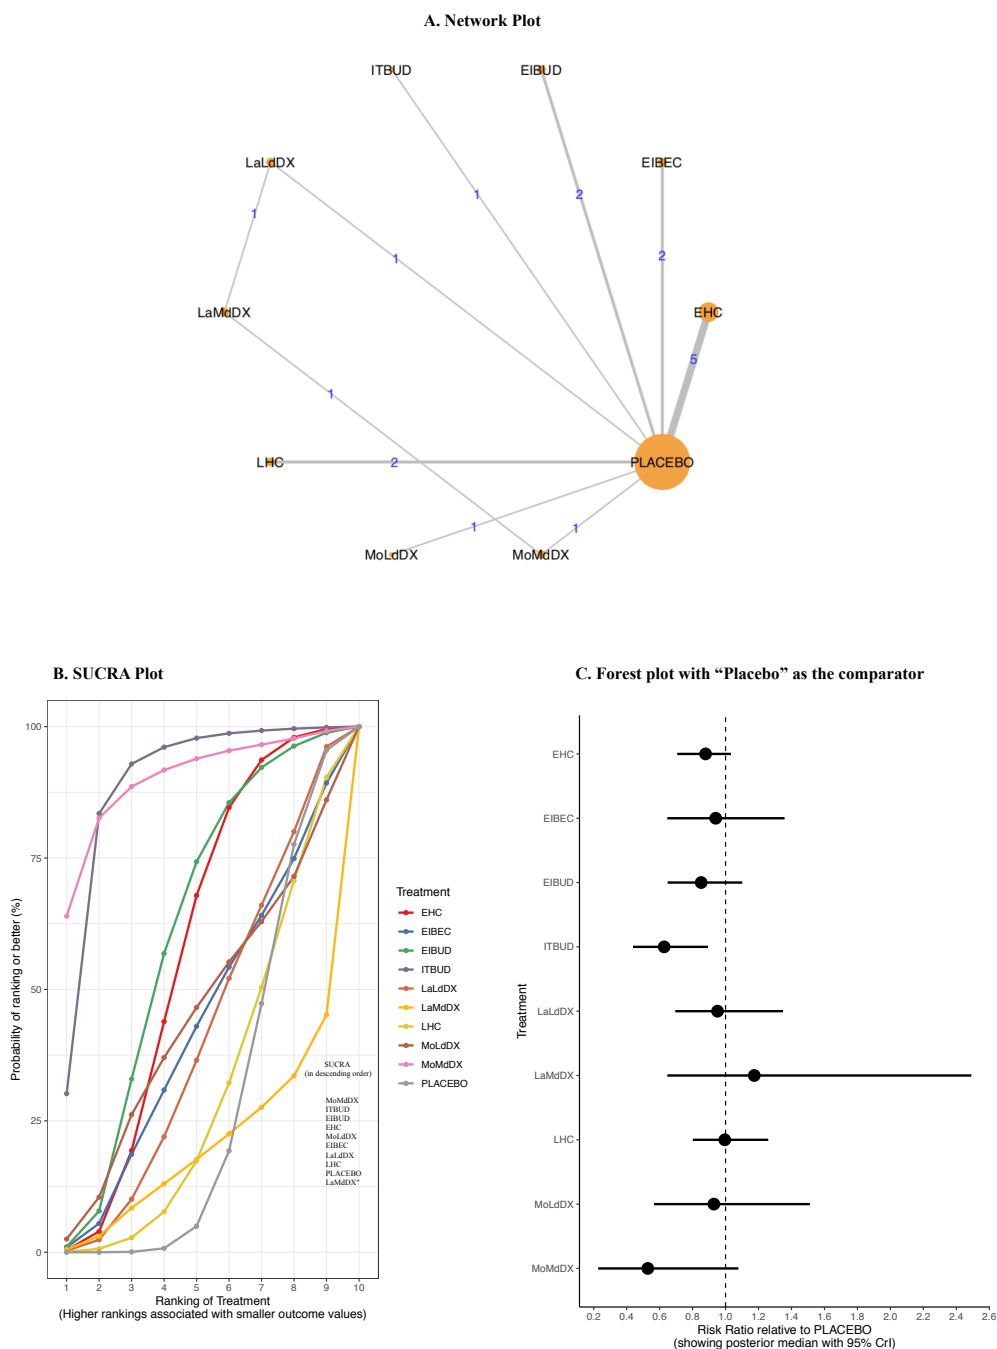

**eFigure 60. League Plot Depicting the Network Estimates [RR (95% CrI)] of Postnatal Corticosteroids Comparisons for Sensitivity Analysis Excluding Trials with Antenatal Corticosteroid Coverage <70%**

|         | Treatment            |                                 |                      |                      |                      |                      |                      |                                 |                                 |                      |
|---------|----------------------|---------------------------------|----------------------|----------------------|----------------------|----------------------|----------------------|---------------------------------|---------------------------------|----------------------|
|         | MoMdDX               | ITBUD                           | EIBUD                | EHC                  | MoLdDX               | EIBEC                | LaLdDX               | LHC                             | PLACEBO                         | LaMdDX               |
| MoMdDX  |                      | 1.33<br>(0.54, 2.97)            | 1.79<br>(0.75, 3.92) | 1.83<br>(0.78, 3.92) | 1.99<br>(0.73, 4.58) | 1.99<br>(0.80, 4.44) | 2.01<br>(0.84, 4.40) | 2.09<br>(0.89, 4.53)            | 2.09<br>(0.93, 4.40)            | 2.60<br>(0.95, 6.28) |
| ITBUD   | 0.91<br>(0.34, 1.87) |                                 | 1.39<br>(0.87, 2.10) | 1.42<br>(0.91, 2.05) | 1.55<br>(0.81, 2.70) | 1.55<br>(0.89, 2.51) | 1.57<br>(0.95, 2.51) | <b>**1.63**</b><br>(1.05, 2.44) | <b>**1.62**</b><br>(1.12, 2.28) | 2.07<br>(0.94, 4.33) |
| EIBUD   | 0.67<br>(0.26, 1.33) | 0.76<br>(0.48, 1.15)            |                      | 1.04<br>(0.73, 1.39) | 1.13<br>(0.63, 1.90) | 1.13<br>(0.70, 1.74) | 1.15<br>(0.75, 1.76) | 1.19<br>(0.84, 1.68)            | 1.19<br>(0.91, 1.54)            | 1.51<br>(0.72, 3.08) |
| EHC     | 0.65<br>(0.26, 1.28) | 0.73<br>(0.49, 1.10)            | 0.99<br>(0.72, 1.37) |                      | 1.10<br>(0.64, 1.82) | 1.10<br>(0.72, 1.65) | 1.11<br>(0.77, 1.67) | 1.16<br>(0.88, 1.58)            | 1.15<br>(0.97, 1.41)            | 1.47<br>(0.73, 2.97) |
| MoLdDX  | 0.62<br>(0.22, 1.36) | 0.71<br>(0.37, 1.24)            | 0.95<br>(0.53, 1.59) | 0.98<br>(0.55, 1.57) |                      | 1.06<br>(0.55, 1.88) | 1.08<br>(0.58, 1.88) | 1.12<br>(0.63, 1.85)            | 1.11<br>(0.66, 1.77)            | 1.42<br>(0.59, 3.14) |
| EIBEC   | 0.61<br>(0.23, 1.25) | 0.69<br>(0.40, 1.12)            | 0.93<br>(0.57, 1.42) | 0.95<br>(0.61, 1.40) | 1.04<br>(0.53, 1.81) |                      | 1.05<br>(0.63, 1.69) | 1.09<br>(0.69, 1.64)            | 1.08<br>(0.74, 1.55)            | 1.38<br>(0.63, 2.89) |
| LaLdDX  | 0.59<br>(0.23, 1.18) | 0.68<br>(0.40, 1.05)            | 0.91<br>(0.57, 1.33) | 0.93<br>(0.60, 1.30) | 1.02<br>(0.53, 1.72) | 1.02<br>(0.59, 1.60) |                      | 1.07<br>(0.69, 1.54)            | 1.06<br>(0.74, 1.44)            | 1.32<br>(0.73, 2.44) |
| LHC     | 0.57<br>(0.22, 1.12) | <b>**0.64**</b><br>(0.41, 0.95) | 0.87<br>(0.59, 1.19) | 0.89<br>(0.63, 1.14) | 0.97<br>(0.54, 1.58) | 0.96<br>(0.61, 1.45) | 0.98<br>(0.65, 1.44) |                                 | 1.01<br>(0.79, 1.25)            | 1.29<br>(0.62, 2.58) |
| PLACEBO | 0.56<br>(0.23, 1.08) | <b>**0.64**</b><br>(0.44, 0.89) | 0.86<br>(0.65, 1.10) | 0.88<br>(0.71, 1.03) | 0.96<br>(0.57, 1.51) | 0.96<br>(0.65, 1.36) | 0.97<br>(0.69, 1.35) | 1.00<br>(0.80, 1.26)            |                                 | 1.27<br>(0.65, 2.49) |
| LaMdDX  | 0.48<br>(0.16, 1.05) | 0.56<br>(0.23, 1.07)            | 0.76<br>(0.32, 1.38) | 0.77<br>(0.34, 1.38) | 0.84<br>(0.32, 1.69) | 0.84<br>(0.35, 1.59) | 0.83<br>(0.41, 1.37) | 0.88<br>(0.39, 1.60)            | 0.88<br>(0.40, 1.55)            |                      |

**eFigure 61. Split Between Direct and Indirect Evidence for Sensitivity Analysis Excluding Trials with Antenatal Corticosteroid Coverage <70%**

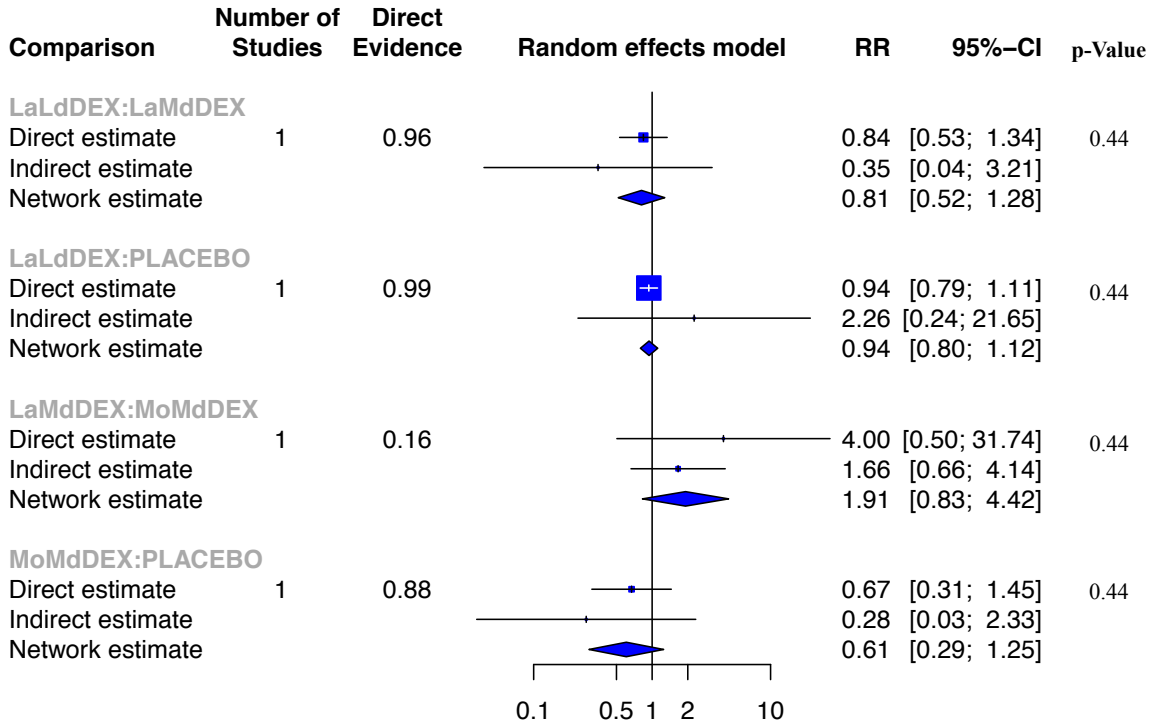

**eFigure 62. Network Plot (A), SUCRA Plot with SUCRA Values (%) (B), and Forest Plot (C) Depicting the Network Estimates [RR (95% CrI)] of the Various Interventions with “Placebo” as the Common Comparator for Sensitivity Analysis by Excluding Trials with High Risk of Bias (C)**

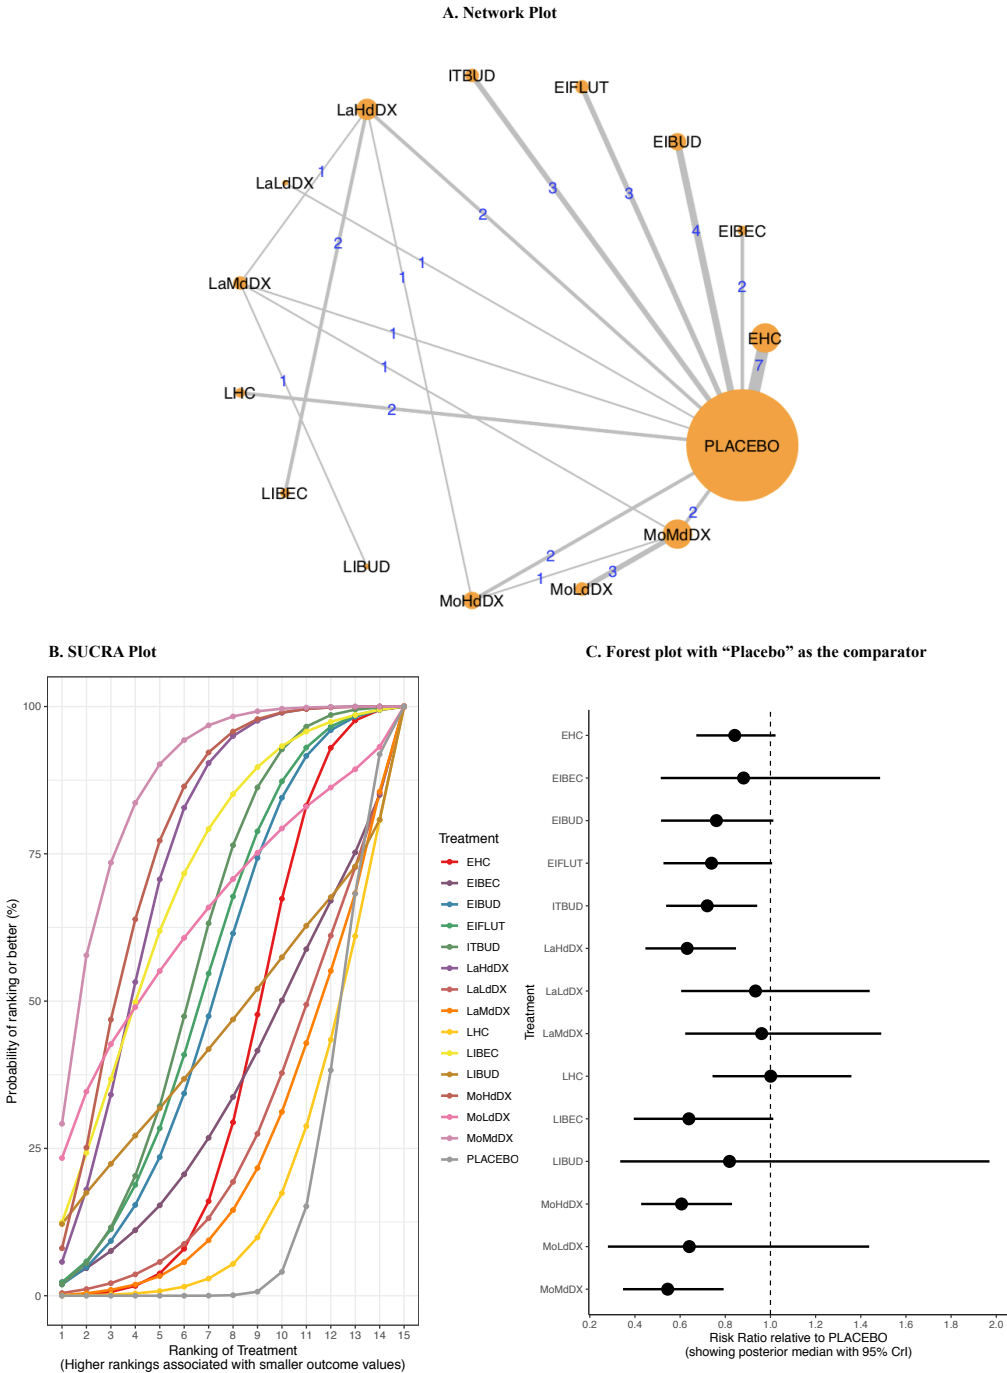

**eFigure 63. League Plot Depicting the Network Estimates [RR (95% CrI)] of Postnatal Corticosteroids Comparisons for Sensitivity Analysis by Excluding Trials with High Risk of Bias**

| Comparator | Treatment                       |                                 |                                 |                      |                      |                                 |                      |                      |                      |                                 |                      |                      |                                 |                                 |                                 |
|------------|---------------------------------|---------------------------------|---------------------------------|----------------------|----------------------|---------------------------------|----------------------|----------------------|----------------------|---------------------------------|----------------------|----------------------|---------------------------------|---------------------------------|---------------------------------|
|            | MoMdDX                          | MoHdDX                          | LaHdDX                          | LIBEC                | MoLdDX               | ITBUD                           | EIFLUT               | EIBUD                | LIBUD                | EHC                             | EIBEC                | LaLdDX               | LaMdDX                          | LHC                             | PLACEBO                         |
| MoMdDX     |                                 | 1.14<br>(0.80, 1.65)            | 1.20<br>(0.73, 1.91)            | 1.24<br>(0.67, 2.19) | 1.26<br>(0.59, 2.42) | 1.37<br>(0.83, 2.23)            | 1.41<br>(0.83, 2.34) | 1.44<br>(0.83, 2.33) | 1.71<br>(0.59, 4.02) | <b>**1.60**</b><br>(1.01, 2.50) | 1.73<br>(0.85, 3.26) | 1.81<br>(0.99, 3.25) | <b>**1.86**</b><br>(1.05, 3.28) | <b>**1.92**</b><br>(1.16, 3.20) | <b>**1.90**</b><br>(1.26, 2.88) |
| MoHdDX     | 0.91<br>(0.61, 1.25)            |                                 | 1.06<br>(0.70, 1.55)            | 1.09<br>(0.63, 1.80) | 1.15<br>(0.48, 2.33) | 1.22<br>(0.78, 1.84)            | 1.25<br>(0.77, 1.94) | 1.28<br>(0.77, 1.95) | 1.51<br>(0.53, 3.46) | 1.42<br>(0.94, 2.06)            | 1.53<br>(0.78, 2.74) | 1.61<br>(0.91, 2.70) | 1.65<br>(0.96, 2.74)            | <b>**1.70**</b><br>(1.08, 2.64) | <b>**1.68**</b><br>(1.20, 2.34) |
| LaHdDX     | 0.89<br>(0.52, 1.36)            | 0.98<br>(0.65, 1.44)            |                                 | 1.03<br>(0.73, 1.45) | 1.12<br>(0.43, 2.39) | 1.17<br>(0.76, 1.76)            | 1.21<br>(0.75, 1.86) | 1.23<br>(0.74, 1.86) | 1.45<br>(0.52, 3.26) | 1.36<br>(0.92, 1.97)            | 1.47<br>(0.76, 2.63) | 1.54<br>(0.88, 2.60) | 1.58<br>(0.96, 2.55)            | <b>**1.64**</b><br>(1.05, 2.53) | <b>**1.62**</b><br>(1.18, 2.24) |
| LIBEC      | 0.88<br>(0.46, 1.48)            | 0.98<br>(0.56, 1.59)            | 1.00<br>(0.69, 1.38)            |                      | 1.12<br>(0.40, 2.49) | 1.17<br>(0.65, 1.94)            | 1.20<br>(0.65, 2.04) | 1.23<br>(0.64, 2.03) | 1.45<br>(0.49, 3.40) | 1.36<br>(0.78, 2.19)            | 1.47<br>(0.68, 2.81) | 1.54<br>(0.78, 2.80) | 1.58<br>(0.84, 2.78)            | 1.64<br>(0.91, 2.78)            | 1.61<br>(0.99, 2.53)            |
| MoLdDX     | 0.90<br>(0.41, 1.70)            | 1.02<br>(0.43, 2.09)            | 1.08<br>(0.42, 2.31)            | 1.11<br>(0.40, 2.53) |                      | 1.24<br>(0.48, 2.70)            | 1.28<br>(0.48, 2.80) | 1.30<br>(0.49, 2.80) | 1.54<br>(0.39, 4.22) | 1.44<br>(0.57, 3.06)            | 1.56<br>(0.52, 3.69) | 1.64<br>(0.59, 3.73) | 1.68<br>(0.62, 3.76)            | 1.73<br>(0.67, 3.78)            | 1.71<br>(0.70, 3.57)            |
| ITBUD      | 0.77<br>(0.45, 1.20)            | 0.86<br>(0.54, 1.29)            | 0.89<br>(0.57, 1.32)            | 0.92<br>(0.51, 1.53) | 0.98<br>(0.37, 2.09) |                                 | 1.05<br>(0.67, 1.57) | 1.07<br>(0.66, 1.57) | 1.27<br>(0.45, 2.88) | 1.19<br>(0.82, 1.65)            | 1.28<br>(0.67, 2.24) | 1.34<br>(0.78, 2.20) | 1.39<br>(0.81, 2.28)            | 1.43<br>(0.94, 2.13)            | <b>**1.41**</b><br>(1.06, 1.86) |
| EIFLUT     | 0.76<br>(0.43, 1.21)            | 0.84<br>(0.51, 1.30)            | 0.87<br>(0.54, 1.33)            | 0.90<br>(0.49, 1.53) | 0.96<br>(0.36, 2.07) | 1.00<br>(0.64, 1.50)            |                      | 1.05<br>(0.63, 1.58) | 1.24<br>(0.43, 2.85) | 1.16<br>(0.77, 1.67)            | 1.25<br>(0.64, 2.23) | 1.32<br>(0.75, 2.21) | 1.36<br>(0.77, 2.28)            | 1.40<br>(0.89, 2.15)            | 1.38<br>(0.99, 1.90)            |
| EIBUD      | 0.74<br>(0.43, 1.20)            | 0.83<br>(0.51, 1.30)            | 0.86<br>(0.54, 1.35)            | 0.89<br>(0.49, 1.56) | 0.94<br>(0.36, 2.05) | 0.98<br>(0.64, 1.52)            | 1.01<br>(0.63, 1.60) |                      | 1.22<br>(0.43, 2.87) | 1.14<br>(0.77, 1.69)            | 1.23<br>(0.64, 2.24) | 1.29<br>(0.75, 2.25) | 1.33<br>(0.76, 2.33)            | 1.37<br>(0.89, 2.19)            | 1.35<br>(0.99, 1.94)            |
| LIBUD      | 0.74<br>(0.25, 1.70)            | 0.83<br>(0.29, 1.88)            | 0.86<br>(0.31, 1.91)            | 0.88<br>(0.29, 2.06) | 0.94<br>(0.24, 2.54) | 0.98<br>(0.35, 2.23)            | 1.01<br>(0.35, 2.31) | 1.03<br>(0.35, 2.34) |                      | 1.14<br>(0.41, 2.56)            | 1.24<br>(0.39, 3.03) | 1.30<br>(0.43, 3.07) | 1.27<br>(0.55, 2.60)            | 1.37<br>(0.48, 3.15)            | 1.36<br>(0.51, 2.99)            |
| EHC        | <b>**0.66**</b><br>(0.40, 0.99) | 0.73<br>(0.49, 1.06)            | 0.76<br>(0.51, 1.09)            | 0.79<br>(0.46, 1.28) | 0.83<br>(0.33, 1.75) | 0.87<br>(0.61, 1.22)            | 0.89<br>(0.60, 1.29) | 0.91<br>(0.59, 1.29) | 1.08<br>(0.39, 2.43) |                                 | 1.09<br>(0.59, 1.86) | 1.15<br>(0.70, 1.83) | 1.18<br>(0.72, 1.89)            | 1.22<br>(0.84, 1.75)            | 1.20<br>(0.98, 1.49)            |
| EIBEC      | 0.65<br>(0.31, 1.18)            | 0.72<br>(0.37, 1.28)            | 0.75<br>(0.38, 1.32)            | 0.77<br>(0.36, 1.47) | 0.82<br>(0.27, 1.91) | 0.86<br>(0.45, 1.49)            | 0.88<br>(0.45, 1.56) | 0.90<br>(0.45, 1.57) | 1.06<br>(0.33, 2.59) | 0.99<br>(0.54, 1.69)            |                      | 1.13<br>(0.54, 2.11) | 1.16<br>(0.56, 2.18)            | 1.20<br>(0.63, 2.11)            | 1.18<br>(0.67, 1.94)            |
| LaLdDX     | 0.60<br>(0.31, 1.01)            | 0.67<br>(0.37, 1.10)            | 0.70<br>(0.38, 1.13)            | 0.72<br>(0.36, 1.28) | 0.76<br>(0.27, 1.70) | 0.79<br>(0.45, 1.28)            | 0.82<br>(0.45, 1.34) | 0.83<br>(0.45, 1.33) | 0.99<br>(0.33, 2.33) | 0.92<br>(0.55, 1.44)            | 1.00<br>(0.47, 1.86) |                      | 1.08<br>(0.56, 1.91)            | 1.11<br>(0.63, 1.83)            | 1.10<br>(0.69, 1.65)            |
| LaMdDX     | <b>**0.58**</b><br>(0.30, 0.96) | 0.65<br>(0.37, 1.04)            | 0.67<br>(0.39, 1.05)            | 0.69<br>(0.36, 1.18) | 0.74<br>(0.27, 1.61) | 0.77<br>(0.44, 1.24)            | 0.79<br>(0.44, 1.30) | 0.81<br>(0.43, 1.31) | 0.92<br>(0.39, 1.82) | 0.90<br>(0.53, 1.40)            | 0.97<br>(0.46, 1.80) | 1.02<br>(0.52, 1.78) |                                 | 1.08<br>(0.61, 1.76)            | 1.07<br>(0.67, 1.61)            |
| LHC        | <b>**0.56**</b><br>(0.31, 0.86) | <b>**0.62**</b><br>(0.38, 0.93) | <b>**0.64**</b><br>(0.40, 0.95) | 0.66<br>(0.36, 1.10) | 0.70<br>(0.26, 1.50) | 0.73<br>(0.47, 1.07)            | 0.75<br>(0.47, 1.12) | 0.77<br>(0.46, 1.13) | 0.91<br>(0.32, 2.06) | 0.85<br>(0.57, 1.19)            | 0.92<br>(0.47, 1.60) | 0.96<br>(0.55, 1.58) | 0.99<br>(0.57, 1.63)            |                                 | 1.01<br>(0.74, 1.34)            |
| PLACEBO    | <b>**0.55**</b><br>(0.35, 0.79) | <b>**0.61**</b><br>(0.43, 0.83) | <b>**0.63**</b><br>(0.45, 0.85) | 0.65<br>(0.39, 1.01) | 0.70<br>(0.28, 1.44) | <b>**0.72**</b><br>(0.54, 0.94) | 0.75<br>(0.53, 1.01) | 0.76<br>(0.52, 1.01) | 0.90<br>(0.33, 1.97) | 0.84<br>(0.67, 1.02)            | 0.91<br>(0.51, 1.49) | 0.95<br>(0.60, 1.44) | 0.98<br>(0.62, 1.49)            | 1.01<br>(0.74, 1.36)            |                                 |

**eFigure 64. Split Between Direct and Indirect Evidence for Sensitivity Analysis by Excluding Trials with High Risk of Bias**

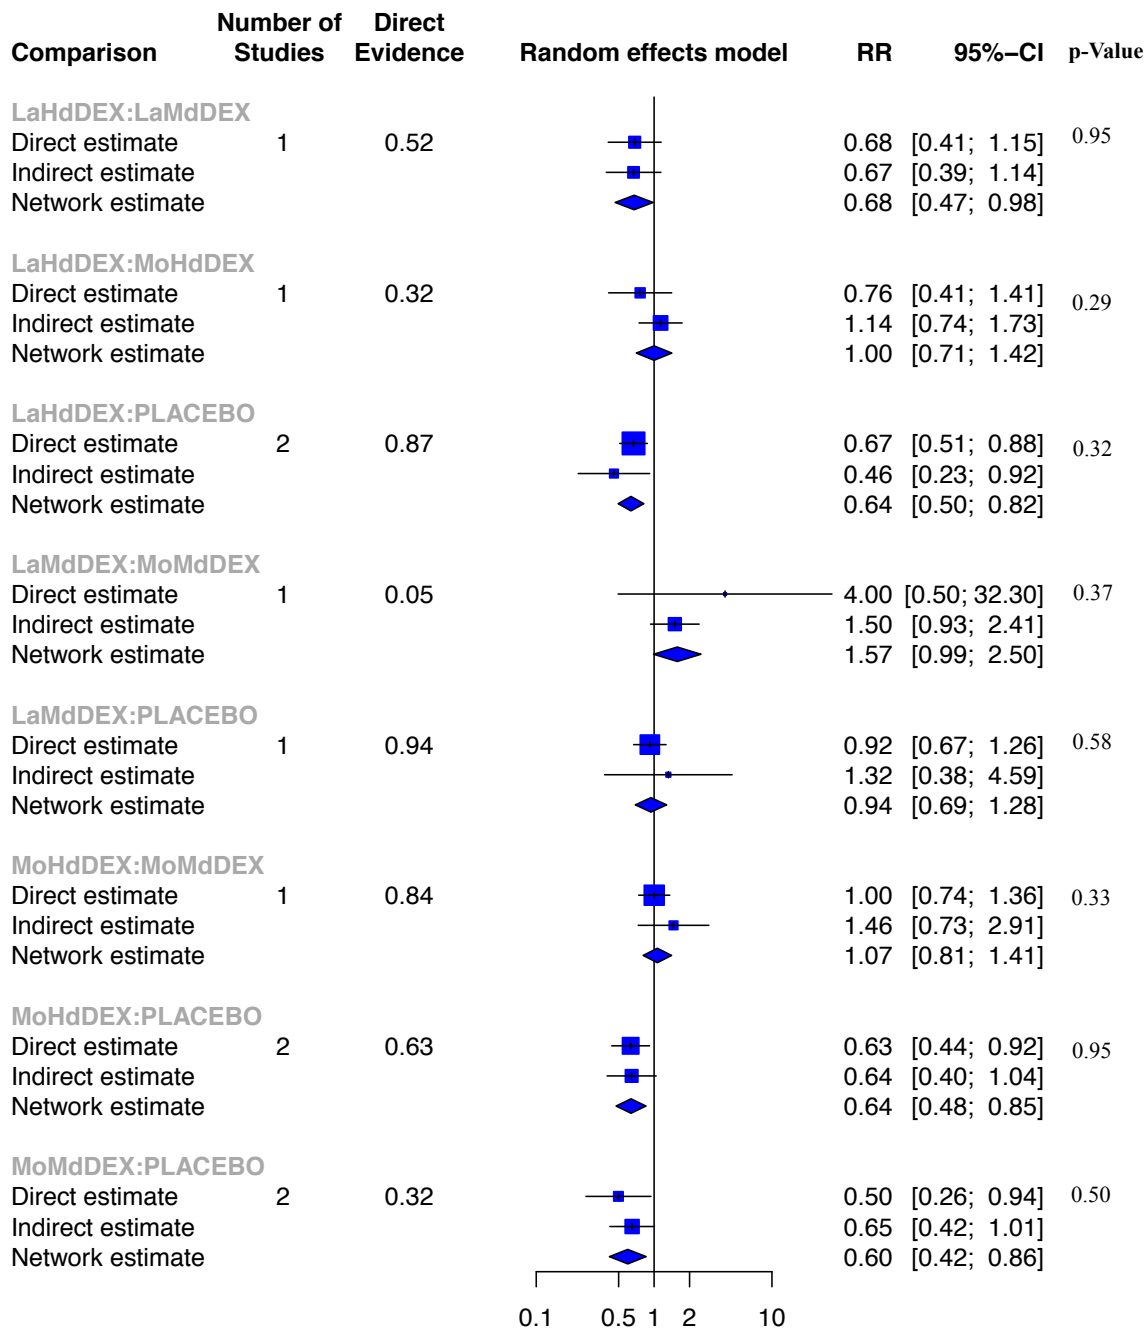



**eFigure 65. Network Plot (A), SUCRA Plot with SUCRA Values (%) (B), and Forest Plot (C) Depicting the Network Estimates [RR (95% CrI)] of the Various Interventions with “Placebo” as the Common Comparator for Sensitivity Analysis by Combining Different Types of Inhaled Corticosteroids (C)**

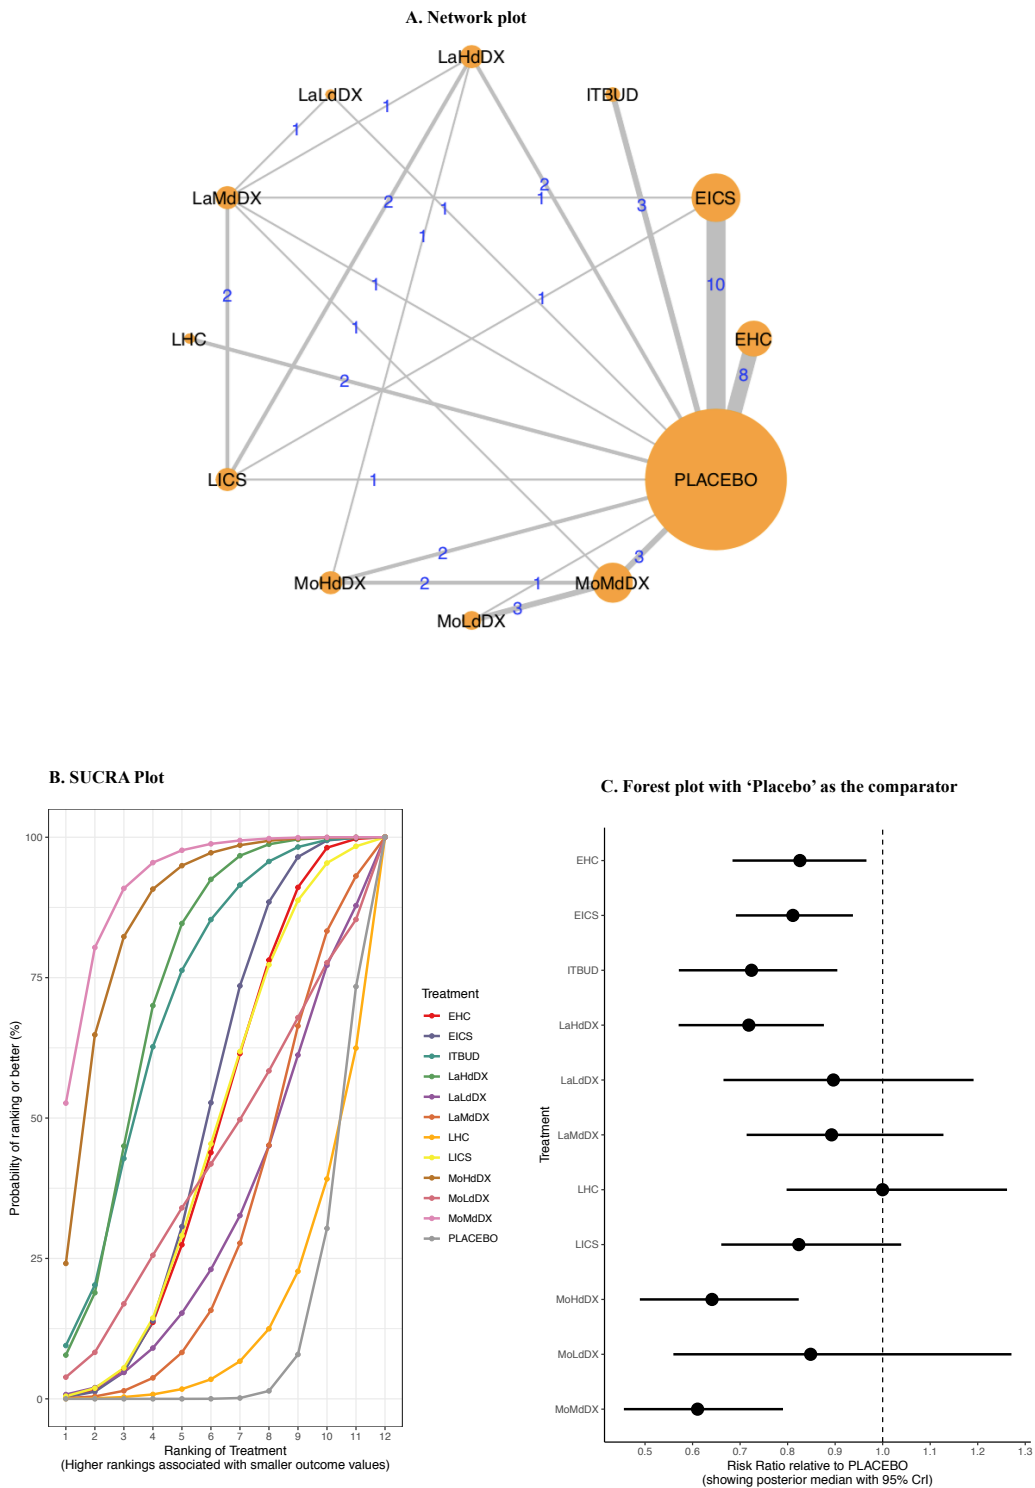

**eFigure 66. League Plot Depicting the Network Estimates [RR (95% CrI)] of Postnatal Corticosteroids Comparisons for Sensitivity Analysis by Combining Different Types of Inhaled Corticosteroids**

|         | Treatment                |                          |                          |                          |                          |                          |                      |                      |                          |                          |                          |                          |
|---------|--------------------------|--------------------------|--------------------------|--------------------------|--------------------------|--------------------------|----------------------|----------------------|--------------------------|--------------------------|--------------------------|--------------------------|
|         | MoMdDX                   | MoHdDX                   | LaHdDX                   | ITBUD                    | EICS                     | EHC                      | LICS                 | MoLdDX               | LaLdDX                   | LaMdDX                   | LHC                      | PLACEBO                  |
| MoMdDX  |                          | 1.06<br>(0.84, 1.34)     | 1.19<br>(0.85, 1.64)     | 1.21<br>(0.84, 1.71)     | 1.35<br>(0.99, 1.83)     | 1.37<br>(0.99, 1.87)     | 1.38<br>(0.97, 1.95) | 1.43<br>(0.91, 2.17) | **1.50**<br>(1.00, 2.20) | **1.49**<br>(1.05, 2.12) | **1.67**<br>(1.17, 2.39) | **1.66**<br>(1.27, 2.20) |
| MoHdDX  | 0.96<br>(0.75, 1.19)     |                          | 1.13<br>(0.82, 1.52)     | 1.15<br>(0.80, 1.60)     | 1.28<br>(0.94, 1.71)     | 1.30<br>(0.94, 1.75)     | 1.31<br>(0.93, 1.81) | 1.36<br>(0.85, 2.08) | 1.43<br>(0.95, 2.07)     | **1.42**<br>(1.01, 1.98) | **1.59**<br>(1.12, 2.23) | **1.58**<br>(1.21, 2.04) |
| LaHdDX  | 0.86<br>(0.61, 1.18)     | 0.90<br>(0.66, 1.22)     |                          | 1.02<br>(0.74, 1.39)     | 1.14<br>(0.89, 1.45)     | 1.16<br>(0.87, 1.50)     | 1.16<br>(0.94, 1.47) | 1.22<br>(0.75, 1.87) | 1.27<br>(0.89, 1.79)     | 1.26<br>(0.97, 1.67)     | **1.42**<br>(1.04, 1.94) | **1.41**<br>(1.14, 1.75) |
| ITBUD   | 0.85<br>(0.59, 1.19)     | 0.90<br>(0.62, 1.25)     | 1.00<br>(0.72, 1.35)     |                          | 1.13<br>(0.85, 1.48)     | 1.15<br>(0.85, 1.50)     | 1.16<br>(0.83, 1.59) | 1.21<br>(0.73, 1.87) | 1.26<br>(0.85, 1.80)     | 1.25<br>(0.90, 1.73)     | **1.40**<br>(1.01, 1.93) | **1.39**<br>(1.11, 1.75) |
| EICS    | 0.76<br>(0.55, 1.01)     | 0.80<br>(0.59, 1.06)     | 0.89<br>(0.69, 1.12)     | 0.90<br>(0.68, 1.18)     |                          | 1.02<br>(0.81, 1.27)     | 1.03<br>(0.81, 1.31) | 1.07<br>(0.68, 1.62) | 1.12<br>(0.80, 1.53)     | 1.11<br>(0.88, 1.43)     | 1.25<br>(0.95, 1.64)     | **1.24**<br>(1.07, 1.45) |
| EHC     | 0.75<br>(0.53, 1.01)     | 0.79<br>(0.57, 1.06)     | 0.88<br>(0.66, 1.15)     | 0.89<br>(0.66, 1.18)     | 0.99<br>(0.79, 1.24)     |                          | 1.01<br>(0.76, 1.36) | 1.06<br>(0.66, 1.61) | 1.10<br>(0.78, 1.54)     | 1.10<br>(0.82, 1.48)     | 1.23<br>(0.93, 1.65)     | **1.22**<br>(1.04, 1.46) |
| LICS    | 0.75<br>(0.51, 1.03)     | 0.79<br>(0.55, 1.07)     | 0.87<br>(0.68, 1.07)     | 0.89<br>(0.63, 1.20)     | 0.99<br>(0.76, 1.24)     | 1.01<br>(0.74, 1.31)     |                      | 1.06<br>(0.64, 1.63) | 1.10<br>(0.76, 1.53)     | 1.09<br>(0.85, 1.39)     | 1.23<br>(0.88, 1.67)     | 1.22<br>(0.96, 1.51)     |
| MoLdDX  | 0.74<br>(0.46, 1.10)     | 0.77<br>(0.48, 1.18)     | 0.87<br>(0.53, 1.33)     | 0.88<br>(0.53, 1.37)     | 0.98<br>(0.62, 1.48)     | 1.00<br>(0.62, 1.51)     | 1.00<br>(0.61, 1.56) |                      | 1.09<br>(0.64, 1.75)     | 1.09<br>(0.67, 1.70)     | 1.22<br>(0.75, 1.90)     | 1.21<br>(0.79, 1.79)     |
| LaLdDX  | **0.69**<br>(0.45, 1.00) | 0.73<br>(0.48, 1.05)     | 0.81<br>(0.56, 1.13)     | 0.82<br>(0.56, 1.17)     | 0.92<br>(0.66, 1.25)     | 0.93<br>(0.65, 1.28)     | 0.94<br>(0.65, 1.32) | 0.98<br>(0.57, 1.56) |                          | 1.01<br>(0.72, 1.40)     | 1.14<br>(0.78, 1.63)     | 1.13<br>(0.84, 1.50)     |
| LaMdDX  | **0.69**<br>(0.47, 0.95) | **0.73**<br>(0.51, 0.99) | 0.81<br>(0.60, 1.03)     | 0.82<br>(0.58, 1.11)     | 0.91<br>(0.70, 1.14)     | 0.93<br>(0.67, 1.21)     | 0.93<br>(0.72, 1.18) | 0.97<br>(0.59, 1.50) | 1.01<br>(0.71, 1.38)     |                          | 1.13<br>(0.81, 1.54)     | 1.13<br>(0.89, 1.40)     |
| LHC     | **0.62**<br>(0.42, 0.85) | **0.65**<br>(0.45, 0.89) | **0.72**<br>(0.52, 0.96) | **0.73**<br>(0.52, 0.99) | 0.82<br>(0.61, 1.05)     | 0.83<br>(0.61, 1.08)     | 0.83<br>(0.60, 1.14) | 0.87<br>(0.53, 1.34) | 0.91<br>(0.61, 1.29)     | 0.90<br>(0.65, 1.24)     |                          | 1.01<br>(0.79, 1.25)     |
| PLACEBO | **0.61**<br>(0.46, 0.79) | **0.64**<br>(0.49, 0.82) | **0.72**<br>(0.57, 0.88) | **0.73**<br>(0.57, 0.90) | **0.81**<br>(0.69, 0.94) | **0.83**<br>(0.68, 0.97) | 0.83<br>(0.66, 1.04) | 0.87<br>(0.56, 1.27) | 0.90<br>(0.67, 1.19)     | 0.90<br>(0.71, 1.13)     | 1.01<br>(0.80, 1.26)     |                          |

**eFigure 67. Split Between Direct and Indirect Evidence for Sensitivity Analysis by Combining Different Types of Inhaled Corticosteroids**

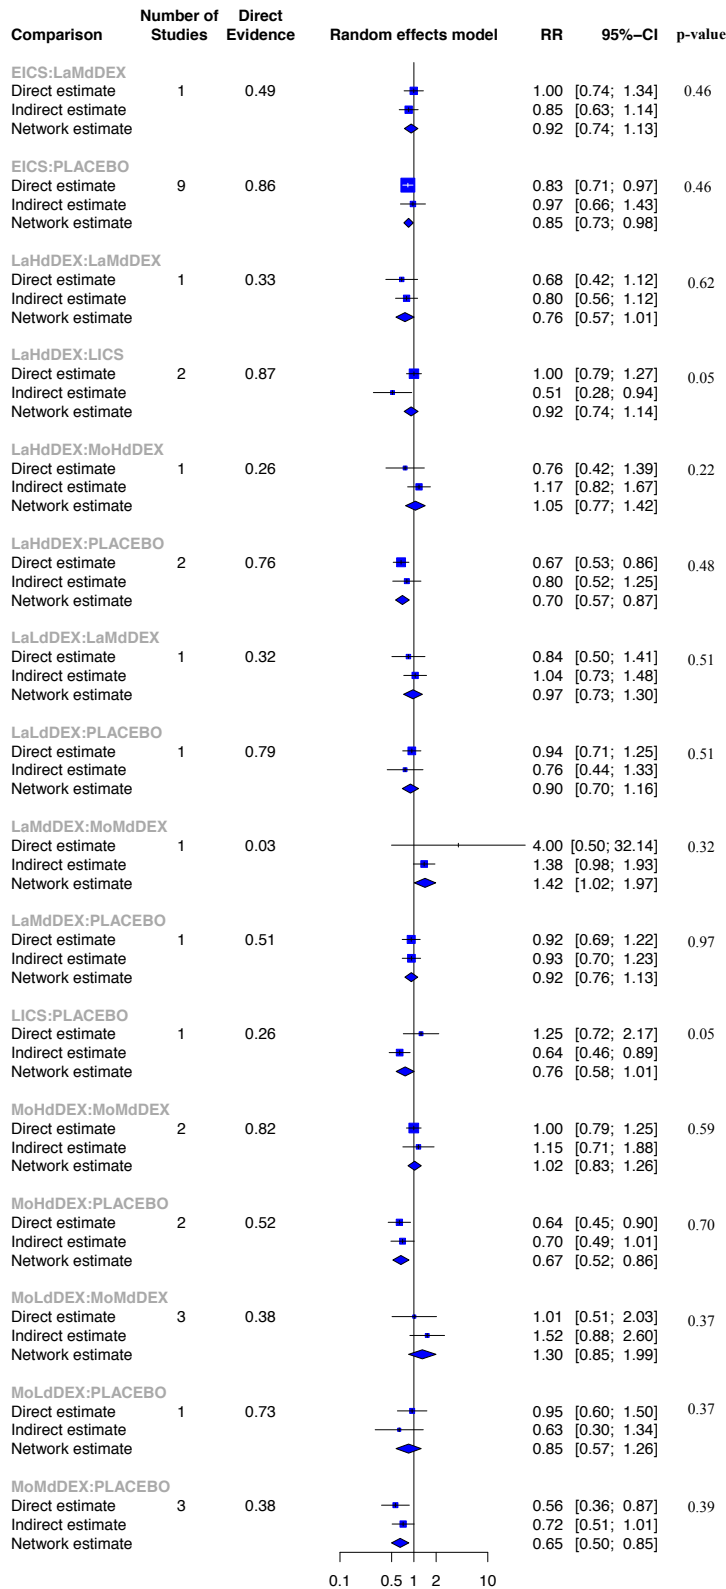

**eTable 1. Literature Search Strategy for Two Electronic Databases**

| <b>CENTRAL search</b> |                                                                                                    |             |
|-----------------------|----------------------------------------------------------------------------------------------------|-------------|
| <b>ID</b>             | <b>Search</b>                                                                                      | <b>Hits</b> |
| #1                    | MeSH descriptor: [Infant, Newborn] explode all trees                                               | 15666       |
| #2                    | (neonat*) OR (newborn*)                                                                            | 43538       |
| #3                    | infan*                                                                                             | 63805       |
| #4                    | (elbw*) OR (vlbw*) OR (lbw*)<br>OR (preterm*) OR (prematur*)                                       | 29753       |
| #5                    | #3 and #4                                                                                          | 15190       |
| #6                    | #1 or #2 or #5                                                                                     | 45834       |
| #7                    | (steroid*) OR (corticosteroid*)<br>OR (dexamethasone) OR<br>(betamethasone) OR<br>(hydrocortisone) | 67005       |
| #8                    | budesonide                                                                                         | 4874        |
| #9                    | #7 or #8                                                                                           | 69545       |
| #10                   | (inhaled) AND (steroid*)                                                                           | 2281        |
| #11                   | (inhaled) AND (corticosteroid*)                                                                    | 5768        |
| #12                   | (inhaled) AND (budesonide)                                                                         | 2052        |
| #13                   | #9 or #10 or #11 or #12                                                                            | 69545       |
| #14                   | (intratracheal) AND (steroid*)                                                                     | 79          |
| #15                   | (intratracheal) AND<br>(corticosteroid*)                                                           | 50          |
| #16                   | (intratracheal) AND (budesonide)                                                                   | 24          |
| #17                   | #14 or #15 or #16                                                                                  | 128         |
| #18                   | #13 or #17                                                                                         | 69545       |
| #19                   | #6 and #18                                                                                         | 2540        |
| <b>Pubmed Search</b>  |                                                                                                    |             |

((((((((neonat\*) OR (bab\*)) OR (newborn\*)) AND ((((((low birth weight) OR (lbw)) OR (elbw)) OR (vlbw)) OR (premat\*) OR (preterm\*))) AND ((((((low birth weight) OR (lbw)) OR (elbw)) OR (vlbw)) OR (premat\*) OR (preterm\*)) AND (infan\*))) OR (infant, low birth weight[MeSH Terms])) OR (infant, very low birth weight[MeSH Terms])) OR (infant, extremely low birth weight[MeSH Terms])) AND ((((((randomized controlled trial[MeSH Terms]) OR (controlled clinical trial[MeSH Terms])) OR (randomized[Title/Abstract])) OR (placebo[Title/Abstract])) OR (randomly[Title/Abstract])) OR (trial[Title/Abstract])) AND (((((((((((corticosteroids) OR (steroids)) OR (betamethasone)) OR (dexamethasone)) OR (hydrocortisone)) OR (budesonide)) OR (((inhaled) AND (steroids)) OR ((inhaled) AND (corticosteroids))) OR ((inhaled) AND (budesonide)))) OR (((intratracheal) AND (steroids)) OR ((intratracheal) AND (corticosteroids)))) OR ((nebulizer[MeSH Terms]) AND (steroids))) OR ((nebulizer[MeSH Terms]) AND (corticosteroids)) OR ((nebuliser[MeSH Terms]) AND (budesonide[MeSH Terms]))))

**eTable 2. Some of the Studies That Were Excluded for Valid Reasons**

| <b>Author / Year</b>                                       | <b>Reason for exclusion</b>                                                                                                                                                                 |
|------------------------------------------------------------|---------------------------------------------------------------------------------------------------------------------------------------------------------------------------------------------|
| Ariagno 1987 <sup>63</sup>                                 | Both arms received systemic dexamethasone with similar day of initiation and similar cumulative dosage.                                                                                     |
| Baden 1972 <sup>64</sup>                                   | Old study using high dose of early hydrocortisone ( 50 mg/kg over 24 hours)                                                                                                                 |
| Barkermeyer 2000 <sup>65</sup>                             | Both arms received systemic dexamethasone with similar day of initiation and similar cumulative dosage.                                                                                     |
| Biswas 2003 <sup>66</sup>                                  | Used hydrocortisone with triiodothyronine in one arm                                                                                                                                        |
| Collaborative Dexamethasone Trial Group 1991 <sup>67</sup> | Classified as systemic dexamethasone use in established BPD as the median age of initiation was > 28 days                                                                                   |
| Da Silva 2002 <sup>68</sup>                                | Age of initiation of systemic dexamethasone could not be classified since reported as 7-21 days encompassing moderate and late initiation cut-off. Cumulative dose of one arm not mentioned |
| DeMartini 1999 <sup>69</sup>                               | Age of initiation of systemic dexamethasone could not be classified as reported as 7-21 days encompassing moderate and late initiation cut-off                                              |
| Dg 2017 <sup>70</sup>                                      | Inclusion criterion < 37 weeks                                                                                                                                                              |
| Groneck 1999 <sup>71</sup>                                 | Systemic dexamethasone cumulative dose not mentioned                                                                                                                                        |
| NG 1998 <sup>72</sup>                                      | No outcomes reported                                                                                                                                                                        |
| Papile 1998 <sup>73</sup>                                  | One arm received systemic dexamethasone at more than 28 days (classified as established BPD)                                                                                                |
| Pappagallo 1998 <sup>74</sup>                              | Injectable dexamethasone used as an inhaled steroid                                                                                                                                         |
| Pokriefka 1993 <sup>75</sup>                               | No inclusion / exclusion criteria mentioned                                                                                                                                                 |
| Townsend 1998 <sup>76</sup>                                | No relevant outcomes reported                                                                                                                                                               |

**eTable 3. Network Characteristics for All the Outcomes and Sensitivity Analysis**

| <b>BPD or Mortality at 36 weeks</b>            |                          |                           |                           |                      |
|------------------------------------------------|--------------------------|---------------------------|---------------------------|----------------------|
| <b>Comparison</b>                              | <b>Number of studies</b> | <b>Number of subjects</b> | <b>Number of outcomes</b> | <b>Event rate(%)</b> |
| EHC Vs Placebo                                 | 8                        | 1123                      | 597                       | 53.2                 |
| EIBEC Vs Placebo                               | 3                        | 360                       | 101                       | 28.1                 |
| EIBUD Vs LaMdDX                                | 1                        | 292                       | 169                       | 57.9                 |
| EIBUD Vs LIBUD                                 | 1                        | 284                       | 168                       | 59.2                 |
| EIBUD Vs Placebo                               | 4                        | 987                       | 404                       | 40.9                 |
| EIFLUT Vs Placebo                              | 3                        | 304                       | 153                       | 50.3                 |
| ITBUD Vs Placebo                               | 3                        | 467                       | 263                       | 56.3                 |
| LaHdDX Vs LIBEC                                | 2                        | 137                       | 104                       | 75.9                 |
| LaHdDX Vs MoHdDX                               | 1                        | 76                        | 31                        | 40.8                 |
| LaLdDX Vs Placebo                              | 1                        | 70                        | 62                        | 88.6                 |
| LHC Vs Placebo                                 | 2                        | 434                       | 323                       | 74.4                 |
| LaHd DX Vs Placebo                             | 2                        | 142                       | 119                       | 83.8                 |
| MoMdDX Vs Placebo                              | 3                        | 120                       | 57                        | 47.5                 |
| MoMdDX Vs MoHdDX                               | 2                        | 92                        | 80                        | 87.0                 |
| MoHdDX Vs Placebo                              | 2                        | 108                       | 70                        | 64.8                 |
| MoLdDX Vs Placebo                              | 1                        | 60                        | 37                        | 61.7                 |
| LaMdDX Vs LaLdDX                               | 1                        | 17                        | 14                        | 82.3                 |
| LaHdDX Vs LaMdDX                               | 1                        | 25                        | 19                        | 76.0                 |
| MoMdDX Vs MoLdDX                               | 3                        | 137                       | 27                        | 19.7                 |
| LaMdDX Vs LIBUD                                | 2                        | 332                       | 192                       | 57.8                 |
| LIBEC Vs Placebo                               | 1                        | 43                        | 20                        | 46.5                 |
| MoMdDX Vs LaMdDX                               | 1                        | 30                        | 5                         | 16.7                 |
| LaMdDX Vs Placebo                              | 1                        | 23                        | 22                        | 95.6                 |
| <b>Secondary outcome - BPD at 36 weeks PMA</b> |                          |                           |                           |                      |
| <b>Comparison</b>                              | <b>Number of studies</b> | <b>Number of subjects</b> | <b>Number of outcomes</b> | <b>Event rate(%)</b> |
| EHC vs. PLACEBO                                | 8                        | 997                       | 395                       | 39.6                 |

|                    |   |     |     |      |
|--------------------|---|-----|-----|------|
| EIBEC vs. PLACEBO  | 3 | 315 | 75  | 23.8 |
| EIBUD vs. LaMdDX   | 1 | 227 | 103 | 45.4 |
| EIBUD vs. LIBUD    | 1 | 222 | 105 | 47.3 |
| EIBUD vs. PLACEBO  | 4 | 852 | 270 | 31.7 |
| EIFLUT vs. PLACEBO | 2 | 64  | 12  | 18.8 |
| ITBUD vs. PLACEBO  | 2 | 317 | 130 | 41.0 |
| LaHdDX vs. LaMdDX  | 1 | 17  | 12  | 70.6 |
| LaHdDX vs. LIBEC   | 2 | 128 | 95  | 74.2 |
| LaHdDX vs. MoHdDX  | 1 | 69  | 24  | 34.8 |
| LaHdDX vs. PLACEBO | 2 | 123 | 86  | 69.9 |
| LaLdDX vs. LaMdDX  | 1 | 16  | 12  | 75.0 |
| LaLdDX vs. PLACEBO | 1 | 65  | 57  | 87.7 |
| LaMdDX vs. LIBUD   | 2 | 266 | 126 | 47.4 |
| LaMdDX vs. MoMdDX  | 1 | 29  | 4   | 13.8 |
| LaMdDX vs. PLACEBO | 1 | 13  | 13  | 100  |
| LHC vs. PLACEBO    | 2 | 346 | 234 | 67.6 |
| LIBEC vs. PLACEBO  | 1 | 75  | 25  | 33.3 |
| MoHdDX vs. MoMdDX  | 2 | 83  | 70  | 84.3 |
| MoHdDX vs. PLACEBO | 2 | 97  | 59  | 60.8 |
| MoLdDX vs. MoMdDX  | 3 | 130 | 20  | 15.4 |
| MoLdDX vs. PLACEBO | 1 | 47  | 24  | 51.1 |
| MoMdDX vs. PLACEBO | 3 | 112 | 45  | 40.2 |

### Secondary Outcome - Mortality

| Comparison         | Number of studies | Number of subjects | Number of outcomes | Event rate(%) |
|--------------------|-------------------|--------------------|--------------------|---------------|
| EHC vs. PLACEBO    | 8                 | 1124               | 218                | 19.4          |
| EIBEC vs. PLACEBO  | 3                 | 360                | 28                 | 7.8           |
| EIBUD vs. LaMdDX   | 1                 | 293                | 75                 | 25.6          |
| EIBUD vs. LIBUD    | 1                 | 285                | 67                 | 23.5          |
| EIBUD vs. PLACEBO  | 5                 | 1056               | 145                | 13.7          |
| EIFLUT vs. PLACEBO | 3                 | 304                | 46                 | 15.1          |



| ITBUD vs. PLACEBO                         | 2                        | 381                       | 67                        | 17.6                 |
|-------------------------------------------|--------------------------|---------------------------|---------------------------|----------------------|
| LaHdDX vs. LaMdDX                         | 1                        | 25                        | 7                         | 28.0                 |
| LaHdDX vs. LIBEC                          | 2                        | 137                       | 9                         | 6.6                  |
| LaHdDX vs. MoHdDX                         | 1                        | 76                        | 7                         | 9.2                  |
| LaHdDX vs. PLACEBO                        | 2                        | 142                       | 33                        | 23.2                 |
| LaLdDX vs. LaMdDX                         | 1                        | 17                        | 2                         | 11.8                 |
| LaLdDX vs. PLACEBO                        | 1                        | 70                        | 8                         | 11.4                 |
| LaMdDX vs. LIBUD                          | 2                        | 332                       | 73                        | 22.0                 |
| LaMdDX vs. MoMdDX                         | 1                        | 30                        | 1                         | 3.3                  |
| LaMdDX vs. PLACEBO                        | 1                        | 23                        | 9                         | 39.1                 |
| LHC vs. PLACEBO                           | 2                        | 435                       | 106                       | 24.4                 |
| LIBEC vs. PLACEBO                         | 2                        | 99                        | 11                        | 11.1                 |
| MoHdDX vs. MoMdDX                         | 2                        | 92                        | 10                        | 10.9                 |
| MoHdDX vs. PLACEBO                        | 2                        | 108                       | 13                        | 12.0                 |
| MoLdDX vs. MoMdDX                         | 3                        | 137                       | 7                         | 5.1                  |
| MoLdDX vs. PLACEBO                        | 1                        | 60                        | 13                        | 21.7                 |
| MoMdDX vs. PLACEBO                        | 4                        | 135                       | 14                        | 10.4                 |
| <b>Secondary Outcome - BPD at 28 days</b> |                          |                           |                           |                      |
| <b>Comparison</b>                         | <b>Number of studies</b> | <b>Number of subjects</b> | <b>Number of outcomes</b> | <b>Event rate(%)</b> |
| EIBEC vs. PLACEBO                         | 3                        | 335                       | 158                       | 47.1                 |
| EIBUD vs. ITBUD                           | 1                        | 138                       | 11                        | 8.0                  |
| EIBUD vs. LaMdDX                          | 1                        | 293                       | 177                       | 60.4                 |
| EIBUD vs. LIBUD                           | 1                        | 285                       | 177                       | 62.1                 |
| EIBUD vs. PLACEBO                         | 4                        | 257                       | 78                        | 30.3                 |
| EIFLUT vs. PLACEBO                        | 2                        | 79                        | 43                        | 54.4                 |
| ITBUD vs. PLACEBO                         | 2                        | 122                       | 18                        | 14.8                 |
| LaHdDX vs. LIBEC                          | 1                        | 76                        | 76                        | 100                  |
| LaHdDX vs. MoHdDX                         | 1                        | 72                        | 42                        | 58.3                 |
| LaMdDX vs. LIBUD                          | 2                        | 332                       | 222                       | 66.9                 |
| LaMdDX vs. MoMdDX                         | 1                        | 30                        | 16                        | 53.3                 |

| LHC vs. PLACEBO                          | 1                        | 371                       | 285                       | 76.8                 |
|------------------------------------------|--------------------------|---------------------------|---------------------------|----------------------|
| LIBEC vs. PLACEBO                        | 1                        | 86                        | 45                        | 52.3                 |
| MoHdDX vs. MoMdDX                        | 1                        | 33                        | 29                        | 87.9                 |
| MoHdDX vs. PLACEBO                       | 2                        | 99                        | 90                        | 90.9                 |
| MoLdDX vs. PLACEBO                       | 1                        | 60                        | 50                        | 83.3                 |
| MoMdDX vs. PLACEBO                       | 2                        | 84                        | 45                        | 53.6                 |
| <b>Secondary Outcome - IVH &gt;II</b>    |                          |                           |                           |                      |
| <b>Comparison</b>                        | <b>Number of studies</b> | <b>Number of subjects</b> | <b>Number of outcomes</b> | <b>Event rate(%)</b> |
| EHC vs. PLACEBO                          | 7                        | 1088                      | 166                       | 15.2                 |
| EIBEC vs. PLACEBO                        | 2                        | 309                       | 30                        | 9.7                  |
| EIBUD vs. PLACEBO                        | 1                        | 69                        | 3                         | 4.3                  |
| EIFLUT vs. PLACEBO                       | 2                        | 265                       | 41                        | 15.5                 |
| ITBUD vs. PLACEBO                        | 1                        | 116                       | 13                        | 11.2                 |
| LaHdDX vs. LIBEC                         | 1                        | 61                        | 15                        | 24.6                 |
| LaHdDX vs. MoHdDX                        | 1                        | 76                        | 7                         | 9.2                  |
| LHC vs. PLACEBO                          | 1                        | 361                       | 5                         | 1.4                  |
| LIBEC vs. PLACEBO                        | 1                        | 19                        | 5                         | 26.3                 |
| MoHdDX vs. MoMdDX                        | 1                        | 33                        | 7                         | 21.2                 |
| MoLdDX vs. PLACEBO                       | 1                        | 60                        | 7                         | 11.7                 |
| <b>Secondary Outcome - PVL</b>           |                          |                           |                           |                      |
| <b>Comparison</b>                        | <b>Number of studies</b> | <b>Number of subjects</b> | <b>Number of outcomes</b> | <b>Event rate(%)</b> |
| EHC vs. PLACEBO                          | 5                        | 894                       | 41                        | 4.6                  |
| EIBEC vs. PLACEBO                        | 2                        | 313                       | 22                        | 7.0                  |
| EIFLUT vs. PLACEBO                       | 2                        | 264                       | 10                        | 3.8                  |
| LaHdDX vs. LIBEC                         | 2                        | 137                       | 17                        | 12.4                 |
| LaHdDX vs. PLACEBO                       | 1                        | 118                       | 20                        | 16.9                 |
| LaLdDX vs. PLACEBO                       | 1                        | 59                        | 3                         | 5.1                  |
| LHC vs. PLACEBO                          | 1                        | 371                       | 16                        | 4.3                  |
| MoHdDX vs. PLACEBO                       | 1                        | 30                        | 1                         | 3.3                  |
| <b>Secondary Outcome - Hyperglycemia</b> |                          |                           |                           |                      |

| <b>Comparison</b>                       | <b>Number of studies</b> | <b>Number of subjects</b> | <b>Number of outcomes</b> | <b>Event rate(%)</b> |
|-----------------------------------------|--------------------------|---------------------------|---------------------------|----------------------|
| EHC vs. PLACEBO                         | 3                        | 590                       | 256                       | 43.4                 |
| EIBUD vs. LaMdDX                        | 1                        | 277                       | 87                        | 31.4                 |
| EIBUD vs. LIBUD                         | 1                        | 266                       | 80                        | 30.1                 |
| EIBUD vs. PLACEBO                       | 1                        | 23                        | 3                         | 13.0                 |
| EIFLUT vs. PLACEBO                      | 2                        | 93                        | 27                        | 29.0                 |
| LaHdDX vs. LaMdDX                       | 1                        | 25                        | 8                         | 32.0                 |
| LaHdDX vs. LIBEC                        | 2                        | 137                       | 4                         | 2.9                  |
| LaHdDX vs. MoHdDX                       | 1                        | 40                        | 13                        | 32.5                 |
| LaHdDX vs. PLACEBO                      | 2                        | 142                       | 20                        | 14.1                 |
| LaLdDX vs. LaMdDX                       | 1                        | 16                        | 3                         | 18.8                 |
| LaMdDX vs. LIBUD                        | 2                        | 303                       | 94                        | 31.0                 |
| LaMdDX vs. MoMdDX                       | 1                        | 30                        | 13                        | 43.3                 |
| LaMdDX vs. PLACEBO                      | 1                        | 23                        | 8                         | 34.8                 |
| LHC vs. PLACEBO                         | 2                        | 434                       | 77                        | 17.7                 |
| MoHdDX vs. PLACEBO                      | 1                        | 78                        | 45                        | 57.7                 |
| MoLdDX vs. MoMdDX                       | 2                        | 109                       | 18                        | 16.5                 |
| MoMdDX vs. PLACEBO                      | 4                        | 135                       | 34                        | 25.2                 |
| <b>Secondary Outcome - Hypertension</b> |                          |                           |                           |                      |
| <b>Comparison</b>                       | <b>Number of studies</b> | <b>Number of subjects</b> | <b>Number of outcomes</b> | <b>Event rate(%)</b> |
| EHC vs. PLACEBO                         | 1                        | 42                        | 4                         | 9.5                  |
| EIBUD vs. LaMdDX                        | 1                        | 274                       | 42                        | 15.3                 |
| EIBUD vs. LIBUD                         | 1                        | 263                       | 30                        | 11.4                 |
| EIBUD vs. PLACEBO                       | 2                        | 879                       | 16                        | 1.8                  |
| EIFLUT vs. PLACEBO                      | 2                        | 93                        | 9                         | 9.7                  |
| LaHdDX vs. LIBEC                        | 2                        | 137                       | 21                        | 15.3                 |
| LaHdDX vs. MoHdDX                       | 1                        | 76                        | 0                         | 0                    |
| LaHdDX vs. PLACEBO                      | 1                        | 118                       | 10                        | 8.4                  |
| LaLdDX vs. LaMdDX                       | 1                        | 16                        | 4                         | 25.0                 |
| LaMdDX vs. LIBUD                        | 2                        | 301                       | 34                        | 11.3                 |

| LaMdDX vs. MoMdDX                     | 1                        | 30                        | 22                        | 73.3                 |
|---------------------------------------|--------------------------|---------------------------|---------------------------|----------------------|
| LHC vs. PLACEBO                       | 2                        | 435                       | 53                        | 12.2                 |
| MoHdDX vs. PLACEBO                    | 1                        | 78                        | 0                         | 0                    |
| MoLdDX vs. MoMdDX                     | 2                        | 109                       | 13                        | 11.9                 |
| MoMdDX vs. PLACEBO                    | 3                        | 99                        | 12                        | 12.1                 |
| <b>Secondary Outcome - NEC &gt;II</b> |                          |                           |                           |                      |
| <b>Comparison</b>                     | <b>Number of studies</b> | <b>Number of subjects</b> | <b>Number of outcomes</b> | <b>Event rate(%)</b> |
| EHC vs. PLACEBO                       | 8                        | 1121                      | 73                        | 6.5                  |
| EIBEC vs. PLACEBO                     | 1                        | 253                       | 41                        | 16.2                 |
| EIBUD vs. LaMdDX                      | 1                        | 289                       | 28                        | 9.7                  |
| EIBUD vs. LIBUD                       | 1                        | 283                       | 25                        | 8.8                  |
| EIBUD vs. PLACEBO                     | 1                        | 856                       | 62                        | 7.2                  |
| EIFLUT vs. PLACEBO                    | 2                        | 264                       | 22                        | 8.3                  |
| LaHdDX vs. LIBEC                      | 1                        | 76                        | 5                         | 6.6                  |
| LaHdDX vs. MoHdDX                     | 1                        | 39                        | 8                         | 20.5                 |
| LaLdDX vs. PLACEBO                    | 1                        | 70                        | 4                         | 5.7                  |
| LaMdDX vs. LIBUD                      | 1                        | 288                       | 29                        | 10.1                 |
| LaMdDX vs. MoMdDX                     | 1                        | 30                        | 0                         | 0                    |
| LHC vs. PLACEBO                       | 2                        | 435                       | 41                        | 9.4                  |
| MoHdDX vs. PLACEBO                    | 2                        | 108                       | 15                        | 13.9                 |
| MoLdDX vs. MoMdDX                     | 2                        | 109                       | 3                         | 2.7                  |
| MoMdDX vs. PLACEBO                    | 1                        | 43                        | 1                         | 2.3                  |
| <b>Secondary Outcome - Sepsis</b>     |                          |                           |                           |                      |
| <b>Comparison</b>                     | <b>Number of studies</b> | <b>Number of subjects</b> | <b>Number of outcomes</b> | <b>Event rate(%)</b> |
| EHC vs. PLACEBO                       | 7                        | 1078                      | 334                       | 31.0                 |
| EIBEC vs. PLACEBO                     | 2                        | 95                        | 55                        | 57.9                 |
| EIBUD vs. LaMdDX                      | 1                        | 288                       | 89                        | 30.9                 |
| EIBUD vs. LIBUD                       | 1                        | 283                       | 88                        | 31.1                 |
| EIBUD vs. PLACEBO                     | 3                        | 909                       | 295                       | 32.4                 |

| EIFLUT vs. PLACEBO                    | 3                        | 304                       | 49                        | 16.1                 |
|---------------------------------------|--------------------------|---------------------------|---------------------------|----------------------|
| ITBUD vs. PLACEBO                     | 2                        | 381                       | 78                        | 20.5                 |
| LaHdDX vs. LaMdDX                     | 1                        | 25                        | 10                        | 40.0                 |
| LaHdDX vs. LIBEC                      | 2                        | 137                       | 24                        | 17.5                 |
| LaHdDX vs. MoHdDX                     | 1                        | 40                        | 2                         | 5.0                  |
| LaHdDX vs. PLACEBO                    | 1                        | 24                        | 9                         | 37.5                 |
| LaLdDX vs. PLACEBO                    | 1                        | 70                        | 33                        | 47.1                 |
| LaMdDX vs. LIBUD                      | 2                        | 325                       | 105                       | 32.3                 |
| LaMdDX vs. MoMdDX                     | 1                        | 30                        | 5                         | 16.7                 |
| LaMdDX vs. PLACEBO                    | 1                        | 23                        | 11                        | 47.8                 |
| LHC vs. PLACEBO                       | 2                        | 435                       | 230                       | 52.9                 |
| LIBEC vs. PLACEBO                     | 3                        | 126                       | 23                        | 18.2                 |
| MoHdDX vs. MoMdDX                     | 2                        | 92                        | 18                        | 19.6                 |
| MoHdDX vs. PLACEBO                    | 2                        | 108                       | 38                        | 35.2                 |
| MoLdDX vs. MoMdDX                     | 3                        | 137                       | 22                        | 16.1                 |
| MoMdDX vs. PLACEBO                    | 3                        | 99                        | 12                        | 12.1                 |
| <b>Secondary Outcome - Severe ROP</b> |                          |                           |                           |                      |
| <b>Comparison</b>                     | <b>Number of studies</b> | <b>Number of subjects</b> | <b>Number of outcomes</b> | <b>Event rate(%)</b> |
| EHC vs. PLACEBO                       | 5                        | 476                       | 110                       | 23.1                 |
| EIBEC vs. PLACEBO                     | 2                        | 309                       | 60                        | 19.4                 |
| EIBUD vs. LaMdDX                      | 1                        | 218                       | 17                        | 7.8                  |
| EIBUD vs. LIBUD                       | 1                        | 212                       | 19                        | 9.0                  |
| EIBUD vs. PLACEBO                     | 1                        | 724                       | 240                       | 33.1                 |
| EIFLUT vs. PLACEBO                    | 1                        | 53                        | 4                         | 7.5                  |
| ITBUD vs. PLACEBO                     | 1                        | 226                       | 16                        | 7.1                  |
| LaHdDX vs. LaMdDX                     | 1                        | 25                        | 5                         | 20.0                 |
| LaHdDX vs. LIBEC                      | 2                        | 128                       | 32                        | 25.0                 |
| LaHdDX vs. MoHdDX                     | 1                        | 35                        | 3                         | 8.6                  |
| LaHdDX vs. PLACEBO                    | 2                        | 132                       | 62                        | 47.0                 |
| LaLdDX vs. PLACEBO                    | 1                        | 61                        | 25                        | 41.0                 |

| LaMdDX vs. LIBUD                                                  | 1                        | 226                       | 22                        | 9.7                  |
|-------------------------------------------------------------------|--------------------------|---------------------------|---------------------------|----------------------|
| LaMdDX vs. MoMdDX                                                 | 1                        | 30                        | 3                         | 10.0                 |
| LaMdDX vs. PLACEBO                                                | 1                        | 23                        | 4                         | 17.4                 |
| LHC vs. PLACEBO                                                   | 1                        | 371                       | 86                        | 23.2                 |
| MoHdDX vs. PLACEBO                                                | 1                        | 65                        | 17                        | 26.1                 |
| MoLdDX vs. MoMdDX                                                 | 2                        | 73                        | 14                        | 19.2                 |
| MoLdDX vs. PLACEBO                                                | 1                        | 47                        | 11                        | 23.4                 |
| MoMdDX vs. PLACEBO                                                | 2                        | 56                        | 13                        | 23.2                 |
| <b>Secondary Outcome - Moderate to severe NDI at 18-24 months</b> |                          |                           |                           |                      |
| <b>Comparison</b>                                                 | <b>Number of studies</b> | <b>Number of subjects</b> | <b>Number of outcomes</b> | <b>Event rate(%)</b> |
| EHC vs. PLACEBO                                                   | 3                        | 676                       | 128                       | 18.9                 |
| EIBEC vs. PLACEBO                                                 | 1                        | 56                        | 17                        | 30.3                 |
| EIBUD vs. PLACEBO                                                 | 1                        | 629                       | 313                       | 49.8                 |
| EIFLUT vs. PLACEBO                                                | 1                        | 187                       | 19                        | 10.2                 |
| ITBUD vs. PLACEBO                                                 | 2                        | 239                       | 84                        | 35.1                 |
| LaHdDX vs. LaMdDX                                                 | 1                        | 18                        | 9                         | 50.0                 |
| LaHdDX vs. MoHdDX                                                 | 1                        | 64                        | 33                        | 51.6                 |
| LaHdDX vs. PLACEBO                                                | 1                        | 14                        | 5                         | 35.7                 |
| LaLdDX vs. LaMdDX                                                 | 1                        | 15                        | 6                         | 40.0                 |
| LaLdDX vs. PLACEBO                                                | 1                        | 56                        | 20                        | 35.7                 |
| LaMdDX vs. PLACEBO                                                | 1                        | 14                        | 10                        | 71.0                 |
| LHC vs. PLACEBO                                                   | 1                        | 37                        | 16                        | 43.2                 |
| MoHdDX vs. MoMdDX                                                 | 2                        | 89                        | 16                        | 18.0                 |
| MoLdDX vs. PLACEBO                                                | 1                        | 33                        | 2                         | 6.1                  |
| <b>Secondary Outcome - CP at 24 months</b>                        |                          |                           |                           |                      |
| <b>Comparison</b>                                                 | <b>Number of studies</b> | <b>Number of subjects</b> | <b>Number of outcomes</b> | <b>Event rate(%)</b> |
| EHC vs. PLACEBO                                                   | 3                        | 676                       | 58                        | 8.6                  |
| EIBEC vs. PLACEBO                                                 | 1                        | 56                        | 7                         | 12.5                 |
| EIBUD vs. PLACEBO                                                 | 1                        | 670                       | 45                        | 6.7                  |
| EIFLUT vs. PLACEBO                                                | 1                        | 190                       | 4                         | 2.1                  |

| LaHdDX vs. LaMdDX                                                               | 1                        | 18                        | 5                         | 27.8                 |
|---------------------------------------------------------------------------------|--------------------------|---------------------------|---------------------------|----------------------|
| LaHdDX vs. PLACEBO                                                              | 1                        | 14                        | 2                         | 14.3                 |
| LaLdDX vs. PLACEBO                                                              | 1                        | 56                        | 10                        | 17.9                 |
| LaMdDX vs. PLACEBO                                                              | 1                        | 14                        | 7                         | 50.0                 |
| LHC vs. PLACEBO                                                                 | 1                        | 37                        | 4                         | 10.8                 |
| MoHdDX vs. PLACEBO                                                              | 2                        | 74                        | 14                        | 18.9                 |
| MoLdDX vs. MoMdDX                                                               | 2                        | 75                        | 8                         | 10.7                 |
| MoLdDX vs. PLACEBO                                                              | 1                        | 33                        | 2                         | 6.1                  |
| <b>Secondary Outcome - Successful extubation by day 7 - 14 of randomization</b> |                          |                           |                           |                      |
| <b>Comparison</b>                                                               | <b>Number of studies</b> | <b>Number of subjects</b> | <b>Number of outcomes</b> | <b>Event rate(%)</b> |
| EHC vs. PLACEBO                                                                 | 1                        | 521                       | 268                       | 51.4                 |
| EIBEC vs. PLACEBO                                                               | 2                        | 99                        | 37                        | 37.3                 |
| EIBUD vs. PLACEBO                                                               | 2                        | 40                        | 18                        | 45.0                 |
| EIFLUT vs. PLACEBO                                                              | 2                        | 93                        | 34                        | 36.5                 |
| ITBUD vs. PLACEBO                                                               | 1                        | 101                       | 29                        | 28.7                 |
| LaHdDX vs. LaMdDX                                                               | 1                        | 25                        | 7                         | 28.0                 |
| LaHdDX vs. LIBEC                                                                | 1                        | 61                        | 13                        | 21.3                 |
| LaLdDX vs. LaMdDX                                                               | 1                        | 16                        | 7                         | 43.7                 |
| LaLdDX vs. PLACEBO                                                              | 1                        | 69                        | 25                        | 36.2                 |
| LHC vs. PLACEBO                                                                 | 2                        | 410                       | 119                       | 29.0                 |
| LIBEC vs. PLACEBO                                                               | 1                        | 19                        | 7                         | 36.8                 |
| LIBUD vs. PLACEBO                                                               | 1                        | 20                        | 0                         | 0                    |
| MoHdDX vs. MoMdDX                                                               | 1                        | 56                        | 47                        | 83.9                 |
| MoLdDX vs. MoMdDX                                                               | 2                        | 109                       | 35                        | 32.1                 |
| MoMdDX vs. PLACEBO                                                              | 3                        | 120                       | 37                        | 30.8                 |
| <b>Secondary Outcome - Gastrointestinal perforation</b>                         |                          |                           |                           |                      |
| <b>Comparison</b>                                                               | <b>Number of studies</b> | <b>Number of subjects</b> | <b>Number of outcomes</b> | <b>Event rate(%)</b> |
| EHC vs. PLACEBO                                                                 | 8                        | 1124                      | 59                        | 5.2                  |
| EIBUD vs. LaMdDX                                                                | 1                        | 289                       | 6                         | 2.1                  |
| EIBUD vs. LIBUD                                                                 | 1                        | 283                       | 5                         | 1.7                  |

| EIBUD vs. PLACEBO                                                                                                                                | 1                        | 856                       | 70                        | 8.2                  |
|--------------------------------------------------------------------------------------------------------------------------------------------------|--------------------------|---------------------------|---------------------------|----------------------|
| LaLdDX vs. LaMdDX                                                                                                                                | 1                        | 16                        | 0                         | 0                    |
| LaMdDX vs. LIBUD                                                                                                                                 | 1                        | 286                       | 9                         | 3.1                  |
| LaMdDX vs. MoMdDX                                                                                                                                | 1                        | 30                        | 0                         | 0                    |
| LHC vs. PLACEBO                                                                                                                                  | 2                        | 434                       | 15                        | 3.4                  |
| MoLdDX vs. MoMdDX                                                                                                                                | 2                        | 109                       | 4                         | 3.7                  |
| MoMdDX vs. PLACEBO                                                                                                                               | 1                        | 41                        | 2                         | 4.9                  |
| <b>Secondary Outcome - Hypertrophic cardiomyopathy</b>                                                                                           |                          |                           |                           |                      |
| <b>Comparison</b>                                                                                                                                | <b>Number of studies</b> | <b>Number of subjects</b> | <b>Number of outcomes</b> | <b>Event rate(%)</b> |
| MoHdDX vs. PLACEBO                                                                                                                               | 2                        | 103                       | 22                        | 21.3                 |
| MoLdDX vs. PLACEBO                                                                                                                               | 1                        | 60                        | 8                         | 13.3                 |
| MoMdDX vs. PLACEBO                                                                                                                               | 1                        | 16                        | 2                         | 12.5                 |
| <b>Sensitivity analysis by including duration of systemic corticosteroid therapy for the primary outcome - Mortality or BPD at 36 weeks' PMA</b> |                          |                           |                           |                      |
| <b>Comparison</b>                                                                                                                                | <b>Number of studies</b> | <b>Number of subjects</b> | <b>Number of outcomes</b> | <b>Event rate(%)</b> |
| EHC vs. PLACEBO                                                                                                                                  | 8                        | 1123                      | 597                       | 53.2                 |
| EIBEC vs. PLACEBO                                                                                                                                | 3                        | 360                       | 101                       | 28.1                 |
| EIBUD vs. LaMdMcDEX                                                                                                                              | 1                        | 292                       | 169                       | 57.9                 |
| EIBUD vs. LIBUD                                                                                                                                  | 1                        | 284                       | 168                       | 59.2                 |
| EIBUD vs. PLACEBO                                                                                                                                | 4                        | 987                       | 404                       | 40.9                 |
| EIFLUT vs. PLACEBO                                                                                                                               | 3                        | 304                       | 153                       | 50.3                 |
| ITBUD vs. PLACEBO                                                                                                                                | 3                        | 467                       | 263                       | 56.3                 |
| LaHdLcDEX vs. LaMdLcDEX                                                                                                                          | 1                        | 25                        | 19                        | 76                   |
| LaHdLcDEX vs. LIBEC                                                                                                                              | 2                        | 137                       | 104                       | 75.9                 |
| LaHdLcDEX vs. MoHdMcDEX                                                                                                                          | 1                        | 76                        | 31                        | 40.8                 |
| LaHdLcDEX vs. PLACEBO                                                                                                                            | 2                        | 142                       | 119                       | 83.8                 |
| LaLdMcDEX vs. PLACEBO                                                                                                                            | 1                        | 70                        | 62                        | 88.6                 |



|                         |   |     |     |      |
|-------------------------|---|-----|-----|------|
| LaMdLcDEX vs. MoMdLcDEX | 1 | 30  | 5   | 16.7 |
| LaMdLcDEX vs. PLACEBO   | 1 | 23  | 22  | 95.6 |
| LaMdMcDEX vs. LIBUD     | 2 | 332 | 192 | 57.8 |
| LHC vs. PLACEBO         | 2 | 434 | 323 | 74.4 |
| LIBEC vs. PLACEBO       | 1 | 86  | 36  | 41.2 |
| MoHdLcDEX vs. MoMdLcDEX | 1 | 33  | 25  | 75.8 |
| MoHdLcDEX vs. MoMdMcDEX | 1 | 59  | 55  | 93.2 |
| MoHdLcDEX vs. PLACEBO   | 1 | 78  | 54  | 69.2 |
| MoHdMcDEX vs. PLACEBO   | 1 | 30  | 16  | 53.3 |
| MoLdScDEX vs. MoMdMcDEX | 1 | 62  | 16  | 25.8 |
| MoLdScDEX vs. MoMdScDEX | 2 | 75  | 11  | 14.7 |
| MoLdScDEX vs. PLACEBO   | 1 | 60  | 37  | 61.7 |
| MoMdMcDEX vs. PLACEBO   | 1 | 36  | 16  | 44.4 |
| MoMdScDEX vs. PLACEBO   | 2 | 84  | 41  | 48.8 |

**Sensitivity analysis by excluding studies with less than 70% antenatal corticosteroids coverage for the primary outcome - Mortality or BPD at 36 weeks' PMA**

| <b>Comparison</b>  | <b>Number of studies</b> | <b>Number of subjects</b> | <b>Number of outcomes</b> | <b>Event rate(%)</b> |
|--------------------|--------------------------|---------------------------|---------------------------|----------------------|
| EHC vs. PLACEBO    | 5                        | 1003                      | 532                       | 53                   |
| EIBEC vs. PLACEBO  | 2                        | 300                       | 89                        | 29.7                 |
| EIBUD vs. PLACEBO  | 2                        | 884                       | 389                       | 44                   |
| ITBUD vs. PLACEBO  | 1                        | 265                       | 144                       | 54.3                 |
| LaLdDX vs. LaMdDX  | 1                        | 17                        | 14                        | 82.3                 |
| LaLdDX vs. PLACEBO | 1                        | 70                        | 62                        | 88.6                 |

| LaMdDX vs. MoMdDX                                                                                                                                                           | 1                        | 30                        | 5                         | 16.7                 |
|-----------------------------------------------------------------------------------------------------------------------------------------------------------------------------|--------------------------|---------------------------|---------------------------|----------------------|
| LHC vs. PLACEBO                                                                                                                                                             | 2                        | 434                       | 323                       | 74.4                 |
| MoLdDX vs. PLACEBO                                                                                                                                                          | 1                        | 60                        | 37                        | 61.7                 |
| MoMdDX vs. PLACEBO                                                                                                                                                          | 1                        | 36                        | 16                        | 44.4                 |
| <b>Sensitivity analysis by excluding studies enrolling non-ventilated neonates at the time of randomization for the primary outcome - Mortality or BPD at 36 weeks' PMA</b> |                          |                           |                           |                      |
| <b>Comparison</b>                                                                                                                                                           | <b>Number of studies</b> | <b>Number of subjects</b> | <b>Number of outcomes</b> | <b>Event rate(%)</b> |
| EHC vs. PLACEBO                                                                                                                                                             | 5                        | 1019                      | 538                       | 52.8                 |
| EIBEC vs. PLACEBO                                                                                                                                                           | 3                        | 360                       | 101                       | 28.0                 |
| EIBUD vs. LaMdDX                                                                                                                                                            | 1                        | 292                       | 169                       | 57.9                 |
| EIBUD vs. LIBUD                                                                                                                                                             | 1                        | 284                       | 168                       | 59.1                 |
| EIBUD vs. PLACEBO                                                                                                                                                           | 4                        | 987                       | 404                       | 40.9                 |
| EIFLUT vs. PLACEBO                                                                                                                                                          | 3                        | 304                       | 153                       | 50.3                 |
| ITBUD vs. PLACEBO                                                                                                                                                           | 2                        | 381                       | 197                       | 51.7                 |
| LaHdDX vs. LaMdDX                                                                                                                                                           | 1                        | 25                        | 19                        | 76                   |
| LaHdDX vs. LIBEC                                                                                                                                                            | 2                        | 137                       | 104                       | 75.9                 |
| LaHdDX vs. MoHdDX                                                                                                                                                           | 1                        | 76                        | 31                        | 40.8                 |
| LaHdDX vs. PLACEBO                                                                                                                                                          | 2                        | 142                       | 119                       | 83.8                 |
| LaLdDX vs. LaMdDX                                                                                                                                                           | 1                        | 17                        | 14                        | 82.3                 |
| LaLdDX vs. PLACEBO                                                                                                                                                          | 1                        | 70                        | 62                        | 88.6                 |
| LaMdDX vs. LIBUD                                                                                                                                                            | 2                        | 332                       | 192                       | 57.8                 |
| LaMdDX vs. MoMdDX                                                                                                                                                           | 1                        | 30                        | 5                         | 16.7                 |
| LaMdDX vs. PLACEBO                                                                                                                                                          | 1                        | 23                        | 22                        | 95.6                 |
| LHC vs. PLACEBO                                                                                                                                                             | 2                        | 434                       | 323                       | 74.4                 |
| LIBEC vs. PLACEBO                                                                                                                                                           | 1                        | 86                        | 36                        | 41.9                 |
| MoHdDX vs. MoMdDX                                                                                                                                                           | 2                        | 92                        | 80                        | 86.9                 |
| MoHdDX vs. PLACEBO                                                                                                                                                          | 2                        | 108                       | 70                        | 64.8                 |
| MoLdDX vs. MoMdDX                                                                                                                                                           | 3                        | 137                       | 27                        | 19.7                 |
| MoLdDX vs. PLACEBO                                                                                                                                                          | 1                        | 60                        | 37                        | 61.7                 |
| MoMdDX vs. PLACEBO                                                                                                                                                          | 3                        | 120                       | 57                        | 47.5                 |

**Sensitivity analysis by excluding intra-tracheal budesonide studies for the primary outcome - Mortality or BPD at 36 weeks' PMA**

| <b>Comparison</b>  | <b>Number of studies</b> | <b>Number of subjects</b> | <b>Number of outcomes</b> | <b>Event rate(%)</b> |
|--------------------|--------------------------|---------------------------|---------------------------|----------------------|
| EHC vs. PLACEBO    | 8                        | 1123                      | 597                       | 53.2                 |
| EIBEC vs. PLACEBO  | 3                        | 360                       | 101                       | 28.1                 |
| EIBUD vs. LaMdDX   | 1                        | 292                       | 169                       | 57.9                 |
| EIBUD vs. LIBUD    | 1                        | 284                       | 168                       | 59.2                 |
| EIBUD vs. PLACEBO  | 4                        | 987                       | 404                       | 40.9                 |
| EIFLUT vs. PLACEBO | 3                        | 304                       | 153                       | 50.3                 |
| LaHdDX vs. LaMdDX  | 1                        | 25                        | 19                        | 76                   |
| LaHdDX vs. LIBEC   | 2                        | 137                       | 104                       | 75.9                 |
| LaHdDX vs. MoHdDX  | 1                        | 76                        | 31                        | 40.8                 |
| LaHdDX vs. PLACEBO | 2                        | 142                       | 119                       | 83.8                 |
| LaLdDX vs. LaMdDX  | 1                        | 17                        | 14                        | 82.3                 |
| LaLdDX vs. PLACEBO | 1                        | 70                        | 62                        | 88.6                 |
| LaMdDX vs. LIBUD   | 2                        | 332                       | 192                       | 57.8                 |
| LaMdDX vs. MoMdDX  | 1                        | 30                        | 5                         | 16.7                 |
| LaMdDX vs. PLACEBO | 1                        | 23                        | 22                        | 95.6                 |
| LHC vs. PLACEBO    | 2                        | 434                       | 323                       | 74.4                 |
| LIBEC vs. PLACEBO  | 1                        | 86                        | 36                        | 41.8                 |
| MoHdDX vs. MoMdDX  | 2                        | 92                        | 80                        | 87                   |
| MoHdDX vs. PLACEBO | 2                        | 108                       | 70                        | 64.8                 |
| MoLdDX vs. MoMdDX  | 3                        | 137                       | 27                        | 19.7                 |
| MoLdDX vs. PLACEBO | 1                        | 60                        | 37                        | 61.6                 |
| MoMdDX vs. PLACEBO | 3                        | 120                       | 57                        | 47.5                 |

**Sensitivity analysis by excluding high risk of bias studies for the primary outcome - Mortality or BPD at 36 weeks' PMA**

| <b>Comparison</b> | <b>Number of studies</b> | <b>Number of subjects</b> | <b>Number of outcomes</b> | <b>Event rate(%)</b> |
|-------------------|--------------------------|---------------------------|---------------------------|----------------------|
| EIBEC vs. PLACEBO | 3                        | 335                       | 158                       | 47.2                 |
| EIBUD vs. ITBUD   | 1                        | 138                       | 11                        | 7.9                  |

|                    |   |     |     |      |
|--------------------|---|-----|-----|------|
| EIBUD vs. LaMdDX   | 1 | 293 | 177 | 60.4 |
| EIBUD vs. LIBUD    | 1 | 285 | 177 | 62.1 |
| EIBUD vs. PLACEBO  | 4 | 257 | 78  | 30.3 |
| EIFLUT vs. PLACEBO | 2 | 79  | 43  | 54.4 |
| ITBUD vs. PLACEBO  | 2 | 122 | 18  | 14.8 |
| LaHdDX vs. LIBEC   | 1 | 76  | 76  | 100  |
| LaHdDX vs. MoHdDX  | 1 | 72  | 42  | 58.3 |
| LaMdDX vs. LIBUD   | 2 | 332 | 222 | 66.9 |
| LaMdDX vs. MoMdDX  | 1 | 30  | 16  | 53.3 |
| LHC vs. PLACEBO    | 1 | 371 | 285 | 76.8 |
| LIBEC vs. PLACEBO  | 1 | 86  | 45  | 52.3 |
| MoHdDX vs. MoMdDX  | 1 | 33  | 29  | 87.9 |
| MoHdDX vs. PLACEBO | 2 | 99  | 90  | 90.9 |
| MoLdDX vs. PLACEBO | 1 | 60  | 50  | 83.3 |
| MoMdDX vs. PLACEBO | 2 | 84  | 45  | 53.6 |

**Sensitivity analysis by combining the different types of inhaled corticosteroids for the primary outcome - Mortality or BPD at 36 weeks' PMA**

| <b>Comparison</b>  | <b>Number of studies</b> | <b>Number of subjects</b> | <b>Number of outcomes</b> | <b>Event rate(%)</b> |
|--------------------|--------------------------|---------------------------|---------------------------|----------------------|
| EHC vs. PLACEBO    | 8                        | 1123                      | 597                       | 53.2                 |
| EICS vs. LaMdDX    | 1                        | 292                       | 169                       | 57.9                 |
| EICS vs. LICS      | 1                        | 284                       | 168                       | 59.2                 |
| EICS vs. PLACEBO   | 10                       | 1651                      | 658                       | 39.9                 |
| ITBUD vs. PLACEBO  | 3                        | 467                       | 263                       | 56.3                 |
| LaHdDX vs. LaMdDX  | 1                        | 25                        | 19                        | 76                   |
| LaHdDX vs. LICS    | 2                        | 137                       | 104                       | 75.9                 |
| LaHdDX vs. MoHdDX  | 1                        | 76                        | 31                        | 40.8                 |
| LaHdDX vs. PLACEBO | 2                        | 142                       | 119                       | 83.8                 |
| LaLdDX vs. LaMdDX  | 1                        | 17                        | 14                        | 82.3                 |
| LaLdDX vs. PLACEBO | 1                        | 70                        | 62                        | 88.6                 |
| LaMdDX vs. LICS    | 2                        | 332                       | 192                       | 57.8                 |
| LaMdDX vs. MoMdDX  | 1                        | 30                        | 5                         | 16.6                 |

|                    |   |     |     |      |
|--------------------|---|-----|-----|------|
| LaMdDX vs. PLACEBO | 1 | 23  | 22  | 95.6 |
| LHC vs. PLACEBO    | 2 | 434 | 323 | 74.4 |
| LICS vs. PLACEBO   | 1 | 86  | 36  | 41.9 |
| MoHdDX vs. MoMdDX  | 2 | 92  | 80  | 86.9 |
| MoHdDX vs. PLACEBO | 2 | 108 | 70  | 64.8 |
| MoLdDX vs. MoMdDX  | 3 | 137 | 27  | 19.7 |
| MoLdDX vs. PLACEBO | 1 | 60  | 37  | 61.7 |
| MoMdDX vs. PLACEBO | 3 | 120 | 57  | 47.5 |

**eTable 4. GRADE/Quality of Evidence for Some of the Secondary Outcomes**

| <b>Secondary Outcome - BPD at 36 weeks' PMA</b>                            |                                 |                            |                                          |                            |
|----------------------------------------------------------------------------|---------------------------------|----------------------------|------------------------------------------|----------------------------|
|                                                                            | <b>Indirect Evidence</b>        | <b>Direct Evidence</b>     | <b>Network Meta-analysis<sup>s</sup></b> |                            |
| <b>Comparison</b>                                                          | <b>Quality of evidence</b>      | <b>Quality of evidence</b> | <b>Risk Ratio(95% Credible Interval)</b> | <b>Quality of evidence</b> |
| ITBUD:EHC                                                                  | Moderate <sup>&amp;</sup>       | -                          | <b>0.62 (0.42, 0.89)</b>                 | Moderate                   |
| ITBUD:PLACEBO                                                              | -                               | Moderate <sup>&amp;</sup>  | <b>0.53 (0.37, 0.72)</b>                 | Moderate                   |
| ITBUD:LHC                                                                  | Moderate <sup>&amp;</sup>       |                            | <b>0.52 (0.34, 0.74)</b>                 | Moderate                   |
| ITBUD:LaLdDX                                                               | Moderate <sup>&amp;</sup>       | -                          | <b>0.61 (0.39, 0.91)</b>                 | Moderate                   |
| ITBUD:LaMdDX                                                               | Low <sup>&amp;&amp;</sup>       |                            | <b>0.63 (0.38, 0.99)</b>                 | Low                        |
| MoMdDX:EHC                                                                 | Low <sup>*&amp;</sup>           | -                          | <b>0.67 (0.47, 0.93)</b>                 | Low                        |
| MoMdDX:LaLdDX                                                              | Very low <sup>*&amp;&amp;</sup> |                            | <b>0.66(0.43, 0.95)</b>                  | Very low                   |
| MoMdDX:PLACEBO                                                             | Moderate <sup>&amp;</sup>       | Low <sup>*&amp;</sup>      | <b>0.58 (0.42, 0.76)</b>                 | Moderate                   |
| MoMdDX:LHC                                                                 | Low <sup>*&amp;</sup>           | -                          | <b>0.56 (0.38, 0.78)</b>                 | Low                        |
| MoHdDX:EHC                                                                 | Moderate <sup>&amp;</sup>       | -                          | <b>0.73 (0.52, 0.99)</b>                 | Moderate                   |
| MoHdDX:LHC                                                                 | Moderate <sup>&amp;</sup>       | -                          | <b>0.61 (0.42, 0.83)</b>                 | Moderate                   |
| MoHdDX:PLACEBO                                                             | Low <sup>*&amp;</sup>           | Moderate <sup>&amp;</sup>  | <b>0.62 (0.47, 0.80)</b>                 | Moderate                   |
| EIBUD:PLACEBO                                                              | Low <sup>*&amp;</sup>           | Moderate <sup>&amp;</sup>  | <b>0.73 (0.57, 0.90)</b>                 | Moderate                   |
| EIBUD:LHC                                                                  | Moderate <sup>&amp;</sup>       | -                          | <b>0.71(0.51, 0.94)</b>                  | Moderate                   |
| LaHdDX:PLACEBO                                                             | Low <sup>*&amp;</sup>           | Moderate <sup>&amp;</sup>  | <b>0.74(0.55, 0.95)</b>                  | Moderate                   |
| LaHdDX:LHC                                                                 | Moderate <sup>&amp;</sup>       |                            | <b>0.71(0.50, 0.98)</b>                  | Moderate                   |
| <b>Secondary Outcome - Mortality</b>                                       |                                 |                            |                                          |                            |
|                                                                            | <b>Indirect Evidence</b>        | <b>Direct Evidence</b>     | <b>Network Meta-analysis</b>             |                            |
| <b>Comparison</b>                                                          | <b>Quality of evidence</b>      | <b>Quality of evidence</b> | <b>Risk Ratio(95% Credible Interval)</b> | <b>Quality of evidence</b> |
| MoMdDX:PLACEBO                                                             | Very low <sup>*&amp;&amp;</sup> | Low <sup>&amp;*</sup>      | <b>0.43 (0.18, 0.82)</b>                 | Low                        |
| EHC:PLACEBO                                                                | -                               | Moderate <sup>&amp;</sup>  | <b>0.69 (0.44, 0.98)</b>                 | Moderate                   |
| <b>Secondary Outcome - Cardiomyopathy (only direct evidence assessed )</b> |                                 |                            |                                          |                            |
|                                                                            | <b>Indirect Evidence</b>        | <b>Direct Evidence</b>     |                                          |                            |

| Comparison                                       | Quality of evidence | Quality of evidence | Risk Ratio(95% Credible Interval) |                     |
|--------------------------------------------------|---------------------|---------------------|-----------------------------------|---------------------|
| MoHdDX:PLACEBO                                   | -                   | Low*&               | 5.94 (1.95;18.11)                 |                     |
| <b>Secondary Outcome - GI Perforation</b>        |                     |                     |                                   |                     |
|                                                  | Indirect Evidence   | Direct Evidence     | Network Meta-analysis             |                     |
| Comparison                                       | Quality of evidence | Quality of evidence | Risk Ratio(95% Credible Interval) | Quality of evidence |
| EHC VS PLACEBO                                   | -                   | Moderate&           | 2.77 (1.09, 9.32)                 | Moderate&           |
| <b>Secondary Outcome - NDI</b>                   |                     |                     |                                   |                     |
|                                                  | Indirect Evidence   | Direct Evidence     | Network Meta-analysis             |                     |
| Comparison                                       | Quality of evidence | Quality of evidence | Risk Ratio(95% Credible Interval) | Quality of evidence |
| LaHdDX:LaMdDX                                    | Low&&               | Low&&               | <b>0.31(0.03, 0.90)</b>           | Low                 |
| <b>Secondary Outcome - Successful extubation</b> |                     |                     |                                   |                     |
|                                                  | Indirect Evidence   | Direct Evidence     | Network Meta-analysis             |                     |
| Comparison                                       | Quality of evidence | Quality of evidence | Risk Ratio(95% Credible Interval) | Quality of evidence |
| LaHdDX:EIFLUT                                    | Low&&               | -                   | <b>10.55 (1.06, 42.94)</b>        | Low                 |
| LaHdDX:EIBEC                                     | Very low+&&         | -                   | <b>11.42 (1.09, 45.47)</b>        | Very low            |
| LaHdDX:PLACEBO                                   | Low&&               | -                   | <b>11.91(1.64,44.49)</b>          | Low                 |
| LaLdDX:PLACEBO                                   | Very low*&&         | Low&&               | <b>6.33(1.62, 18.56)</b>          | Low                 |
| MoHdDX:PLACEBO                                   | Low*&               | -                   | <b>4.96 (1.14, 14.75)</b>         | Low                 |
| ITBUD:PLACEBO                                    | -                   | Low&&               | <b>4.36 (1.04, 12.90)</b>         | Low                 |
| MoMdDX:PLACEBO                                   | -                   | Low*&               | <b>3.16 (1.35, 6.82)</b>          | Low                 |
| <b>Secondary Outcome - Hypertension</b>          |                     |                     |                                   |                     |
|                                                  | Indirect Evidence   | Direct Evidence     | Network Meta-analysis             |                     |
| Comparison                                       | Quality of evidence | Quality of evidence | Risk Ratio(95% Credible Interval) | Quality of evidence |

|                                                                                                                                                                                                                                                                                                                                                                                                                                                                                                                                                                                                                                                                                                                                                                                                                                                                                                                                        |       |       |                  |                        |
|----------------------------------------------------------------------------------------------------------------------------------------------------------------------------------------------------------------------------------------------------------------------------------------------------------------------------------------------------------------------------------------------------------------------------------------------------------------------------------------------------------------------------------------------------------------------------------------------------------------------------------------------------------------------------------------------------------------------------------------------------------------------------------------------------------------------------------------------------------------------------------------------------------------------------------------|-------|-------|------------------|------------------------|
| MoMdx:PLACEBO                                                                                                                                                                                                                                                                                                                                                                                                                                                                                                                                                                                                                                                                                                                                                                                                                                                                                                                          | Low*& | Low*& | 3.96(1.10,30.91) | Very low <sup>++</sup> |
| <p>*Limitations (risk of bias). <sup>+</sup>Heterogeneity. &amp;Imprecision. &amp;&amp;Severe imprecision.#Indirectness, <sup>+</sup>Inconsistency, <sup>\$</sup> values in bold are statistically significant</p> <p><b>GRADE Ranking the Quality of Evidence</b></p> <p><i>High quality</i> - Very confident that the true effect lies close to that of the estimate of the effect</p> <p><i>Moderate quality</i> - Moderately confident in the effect estimate: the true effect is likely to be close to the estimate of the effect, but there is a possibility that it is substantially different</p> <p><i>Low quality</i> - Confidence in the effect estimate is limited: the true effect may be substantially different from the estimate of the effect</p> <p><i>Very low quality</i> - Very little confidence in the effect estimate: the true effect is likely to be substantially different from the estimate of effect</p> |       |       |                  |                        |



## REFERENCES

1. Dimitriou G, Greenough A, Giffin FJ, Kavadia V. Inhaled versus systemic steroids in chronic oxygen dependency of preterm infants. *Eur J Pediatr.* 1997;156(1):51-55.
2. Halliday HL, Patterson CC, Halahakoon CW; European Multicenter Steroid Study Group. A multicenter, randomized open study of early corticosteroid treatment (OSECT) in preterm infants with respiratory illness: comparison of early and late treatment and of dexamethasone and inhaled budesonide. *Pediatrics.* 2001;107(2):232-240.
3. Cole CH, Colton T, Shah BL, et al. Early inhaled glucocorticoid therapy to prevent bronchopulmonary dysplasia. *N Engl J Med.* 1999;340(13):1005-1010.
4. Zimmerman JJ, Gabbert D, Shivpuri C, Kayata S, Miller J, Ciesielski W. Meter-dosed, inhaled beclomethasone initiated at birth to prevent bronchopulmonary dysplasia. *Pediatr Crit Care Med.* 2000;1(2):140-145.
5. Jangaard KA, Stinson DA, Allen AC, Vincer MJ. Early prophylactic inhaled beclomethasone in infants less than 1250 g for the prevention of chronic lung disease. *Paediatr Child Health.* 2002;7(1):13-19
6. Yeh TF, Lin HC, Chang CH, et al. Early intratracheal instillation of budesonide using surfactant as a vehicle to prevent chronic lung disease in preterm infants: a pilot study. *Pediatrics.* 2008;121(5): e1310-e1318.
7. Kuo HT, Lin HC, Tsai CH, Chouc IC, Yeh TF. A follow-up study of preterm infants given budesonide using surfactant as a vehicle to prevent chronic lung disease in preterm infants. *J Pediatr.* 2010;156(4):537-541.
8. Yeh TF, Chen CM, Wu SY, et al. Intratracheal Administration of Budesonide/Surfactant to Prevent Bronchopulmonary Dysplasia. *Am J Respir Crit Care Med.* 2016;193(1):86-95.
9. Pan J, Chen MW, Ni WQ, et al. *Zhongguo Dang Dai Er Ke Za Zhi.* 2017;19(2):137-141.
10. Ke H, Li ZK, Yu XP, Guo JZ. *Zhongguo Dang Dai Er Ke Za Zhi.* 2016;18(5):400-404.

11. Cao YY, Yao G, Wang Y, *et al.* Aerosol Inhalation of Budesonide and Pulmonary Surfactant to Prevent Bronchopulmonary Dysplasia. *J Pediatr Pharmacy*, 2018,24(03):25-29
12. Merz U, Kusenbach G, Hausler M, Peschgens T, Hornchen H. Inhaled budesonide in ventilator dependent preterm infants: A randomized, double-blind pilot study. *Biology of the Neonate* 1999; 75:46-53.
13. Lin Y, Lin H, Lin C, *et al.* Early endotracheal instillation of budesonide (B) for prevention of CLD in preterm infant with RDS-a double blind clinical trial. *Ped Res* 2001;49:278A.
14. Bassler D, Plavka R, Shinwell ES, *et al.* Early Inhaled Budesonide for the Prevention of Bronchopulmonary Dysplasia. *N Engl J Med.* 2015;373(16):1497-1506.
15. Bassler D, Shinwell ES, Hallman M, *et al.* Long-Term Effects of Inhaled Budesonide for Bronchopulmonary Dysplasia. *N Engl J Med.* 2018;378(2):148-157.
16. Sadeghnia A, Beheshti BK, Mohammadizadeh M. The Effect of Inhaled Budesonide on the Prevention of Chronic Lung Disease in Premature Neonates with Respiratory Distress Syndrome. *Int J Prev Med.* 2018; 9:15
17. Fok TF, Lam K, Dolovich M, *et al.* Randomised controlled study of early use of inhaled corticosteroid in preterm infants with respiratory distress syndrome. *Arch Dis Child Fetal Neonatal Ed.* 1999;80(3): F203-F208
18. Yong\_WSC, Carney\_S, Pearse\_RG, Gibson\_AT. The effect of inhaled fluticasone propionate (FP) on premature babies at risk for developing chronic lung disease of prematurity. *Arch Dis Child Fetal Neonatal Ed.* 1999;80: G64.
19. Nakamura T, Yonemoto N, Nakayama M, *et al.* Early inhaled steroid use in extremely low birthweight infants: a randomised controlled trial. *Arch Dis Child Fetal Neonatal Ed.* 2016;101(6): F552-F556

20. Malloy\_CA, Hilal\_K, Weiss\_MG, Rizvi\_Z, Muraskas\_JK. A prospective, randomized, double-masked trial comparing low dose to conventional dose dexamethasone in neonatal chronic lung disease. *Internet Journal of Pediatrics and Neonatology* 2005; 5 (1) :10473.
21. Watterberg KL, Gerdes JS, Gifford KL, Lin HM. Prophylaxis against early adrenal insufficiency to prevent chronic lung disease in premature infants. *Pediatrics*. 1999;104(6):1258-1263.
22. Efirid\_MM, Heerens\_AT, Gordon\_PV, Bose\_CL, Young\_DA. A randomized controlled trial of prophylactic hydrocortisone supplementation for the prevention of hypotension in extremely low birth weight infants. *J Perinatol* 2005;25(2):119-24.
23. Watterberg KL, Gerdes JS, Cole CH, et al. Prophylaxis of early adrenal insufficiency to prevent bronchopulmonary dysplasia: a multicenter trial. *Pediatrics*. 2004;114(6):1649-1657.
24. Watterberg KL, Shaffer ML, Mishefske MJ, et al. Growth and neurodevelopmental outcomes after early low-dose hydrocortisone treatment in extremely low birth weight infants. *Pediatrics*. 2007;120(1):40-48
25. Peltoniemi O, Kari MA, Heinonen K, et al. Pretreatment cortisol values may predict responses to hydrocortisone administration for the prevention of bronchopulmonary dysplasia in high-risk infants. *J Pediatr*. 2005;146(5):632-637.
26. Peltoniemi OM, Lano A, Puosi R, et al. Trial of early neonatal hydrocortisone: two-year follow-up. *Neonatology*. 2009;95(3):240-247
27. Bonsante F, Latorre G, Iacobelli S, et al. Early low-dose hydrocortisone in very preterm infants: a randomized, placebo-controlled trial. *Neonatology*. 2007;91(4):217-221.
28. Ng PC, Lee CH, Bnur FL, et al. A double-blind, randomized, controlled study of a "stress dose" of hydrocortisone for rescue treatment of refractory hypotension in preterm infants. *Pediatrics*. 2006;117(2):367-375.

- 29.Hochwald O, Palegra G, Osiovič H. Adding hydrocortisone as 1st line of inotropic treatment for hypotension in very low birth weight infants. *Indian J Pediatr.* 2014;81(8): 808-810.
- 30.Baud O, Maury L, Lebail F, et al. Effect of early low-dose hydrocortisone on survival without bronchopulmonary dysplasia in extremely preterm infants (PREMILOC): a double-blind, placebo-controlled, multicentre, randomised trial. *Lancet.* 2016;387(10030): 1827-1836.
- 31.Baud O, Trousson C, Biran V, et al. Two-year neurodevelopmental outcomes of extremely preterm infants treated with early hydrocortisone: treatment effect according to gestational age at birth. *Arch Dis Child Fetal Neonatal Ed.* 2019;104(1): F30-F35.
- 32.LaForce WR, Brudno DS. Controlled trial of beclomethasone dipropionate by nebulization in oxygen- and ventilator-dependent infants. *Journal of Pediatrics* 1993; 122:285-8.
- 33.Giep T, Raibbly P, Zuerlein T, Schwartz ID. Trial of beclomethasone dipropionate by metered-dose inhaler in ventilator-dependent neonates less than 1500 grams. *Am J Perinatol.* 1996;13(1):5-9
- 34.Denjeau A, Paris-Llado J, Zupan V, et al. Inhaled salbutamol and beclomethasone for preventing broncho-pulmonary dysplasia: a randomised double-blind study. *Eur J Pediatr.* 1998;157(11):926-931
- 35.Rozycki HJ, Byron PR, Elliott GR, Carroll T, Gutcher GR. Randomized controlled trial of three different doses of aerosol beclomethasone versus systemic dexamethasone to promote extubation in ventilated premature infants. *Pediatr Pulmonol.* 2003;35(5):375-383.
- 36.Suchomski SJ, Cummings JJ. A randomized trial of inhaled versus intravenous steroids in ventilator-dependent preterm infants. *J Perinatol.* 2002;22(3):196-203.

37. Arnon S, Grigg J, Silverman M. Effectiveness of budesonide aerosol in ventilator-dependent preterm babies: a preliminary report. *Pediatr Pulmonol.* 1996;21(4):231-235.
38. Jónsson B, Eriksson M, Söder O, Broberger U, Lagercrantz H. Budesonide delivered by dosimetric jet nebulization to preterm very low birthweight infants at high risk for development of chronic lung disease. *Acta Paediatr.* 2000;89(12):1449-1455.
39. Parikh NA, Kennedy KA, Lasky RE, McDavid GE, Tyson JE. Pilot randomized trial of hydrocortisone in ventilator-dependent extremely preterm infants: effects on regional brain volumes. *J Pediatr.* 2013;162(4):685-690.e1.
40. Parikh NA, Kennedy KA, Lasky RE, Tyson JE. Neurodevelopmental Outcomes of Extremely Preterm Infants Randomized to Stress Dose Hydrocortisone. *PLoS One.* 2015;10(9): e0137051.
41. Onland W, Cools F, Kroon A, et al. Effect of Hydrocortisone Therapy Initiated 7 to 14 Days After Birth on Mortality or Bronchopulmonary Dysplasia Among Very Preterm Infants Receiving Mechanical Ventilation: A Randomized Clinical Trial. *JAMA.* 2019;321(4):354-363.
42. Cummings JJ, D'Eugenio DB, Gross SJ. A controlled trial of dexamethasone in preterm infants at high risk for bronchopulmonary dysplasia. *N Engl J Med.* 1989;320(23):1505-1510.
43. Kothadia JM, O'Shea TM, Roberts D, Auringer ST, Weaver RG 3rd, Dillard RG. Randomized placebo-controlled trial of a 42-Day tapering course of dexamethasone to reduce the duration of ventilator dependency in very low birth weight infants *Pediatrics.* 1999;104(1 Pt 1):22-27.
44. Doyle LW, Davis PG, Morley CJ, McPhee A, Carlin JB; DART Study Investigators. Low-dose dexamethasone facilitates extubation among chronically ventilator-dependent infants: a multicenter, international, randomized, controlled trial. *Pediatrics.* 2006;117(1):75-83

45. Doyle LW, Davis PG, Morley CJ, McPhee A, Carlin JB; DART Study Investigators. Outcome at 2 years of age of infants from the DART study: a multicenter, international, randomized, controlled trial of low-dose dexamethasone. *Pediatrics*. 2007;119(4): 716-721.
46. Kari MA, Heinonen K, Ikonen RS, Koivisto M, Raivio KO. Dexamethasone treatment in preterm infants at risk for bronchopulmonary dysplasia. *Arch Dis Child*. 1993;68 : 566-569.
47. Ramanathan\_R, Siassi\_B, Sardesai\_S, deLemos\_RA. Comparison of two dosage regimens of dexamethasone for early treatment of chronic lung disease in very low birth weight (VLBW). *Pediatric Research* 1994; 34:250A.
48. Brozanski BS, Jones JG, Gilmour CH, et al. Effect of pulse dexamethasone therapy on the incidence and severity of chronic lung disease in the very low birth weight infant. *J Pediatr*. 1995;126(5 Pt 1):769-776
49. Durand M, Sardesai S, McEvoy C. Effect of early dexamethasone therapy on pulmonary mechanics and chronic lung disease in very low birth weight infants: a randomised controlled trial. *Pediatrics* 1995;95:584-90.
50. Scott\_SM, Backstrom\_C, Bessman\_S. Effect of five days of dexamethasone therapy on ventilator dependence and adrenocorticotropic hormone-stimulated cortisol concentrations. *J of Perinatol* 1997;17(1):24-8.
51. Bloomfield FH, Knight DB, Harding JE. Side effects of 2 different dexamethasone courses for preterm infants at risk of chronic lung disease: a randomized trial. *J Pediatr*. 1998;133(3):395-400
52. Armstrong DL, Penrice J, Bloomfield FH, Knight DB, Dezoete JA, Harding JE. Follow up of a randomised trial of two different courses of dexamethasone for preterm babies at risk of chronic lung disease. *Arch Dis Child Fetal Neonatal Ed*. 2002;86(2): F102-F107.

- 53.Kovács L, Davis GM, Faucher D, Papageorgiou A. Efficacy of sequential early systemic and inhaled corticosteroid therapy in the prevention of chronic lung disease of prematurity. *Acta Paediatr.* 1998;87(7):792-798.
- 54.Merz U, Kusenbach G, Häusler M, Peschgens T, Hörnchen H. Inhaled budesonide in ventilator-dependent preterm infants: a randomized, double-blind pilot study. *Biol Neonate.* 1999;75(1):46-53.
- 55.Romagnoli C, Zecca E, Vento G, Carolis MP, Papacci P, Tortorolo G. Early postnatal dexamethasone for the prevention of chronic lung disease in high-risk preterm infants. *Intensive Care Medicine* 1999;25(7):717-21.
- 56.Romagnoli C, Zecca E, Luciano R, Torrioli G, Tortorolo G. A three year follow up of preterm infants after moderately early treatment with dexamethasone. *Arch Dis Child Fetal Neonatal Ed.* 2002;87(1): F55-F58.
- 57.Durand M, Mendoza ME, Tantivit P, Kugelman A, McEvoy C. A randomized trial of moderately early low-dose dexamethasone therapy in very low birth weight infants: dynamic pulmonary mechanics, oxygenation, and ventilation. *Pediatrics.* 2002;109(2):262-268.
- 58.Walther FJ, Findlay RD, Durand M. Adrenal suppression and extubation rate after moderately early low-dose dexamethasone therapy in very preterm infants. *Early Hum Dev.* 2003;74(1):37-45.
- 59.McEvoy C, Bowling S, Williamson K, McGaw P, Durand M. Randomized, double-blinded trial of low-dose dexamethasone: II. Functional residual capacity and pulmonary outcome in very low birth weight infants at risk for bronchopulmonary dysplasia. *Pediatr Pulmonol.* 2004;38(1):55-63
- 60.Odd DE, Armstrong DL, Teele RL, Kuschel CA, Harding JE. A randomized trial of two dexamethasone regimens to reduce side-effects in infants treated for chronic lung disease of prematurity. *J Paediatr Child Health.* 2004;40(5-6):282-289.

61. Alishiri A, Mosavi SA. Association of postnatal dexamethasone use in the development of retinopathy of prematurity in low birth weight infants. *Int Eye Sci*, 2015; 15(3): 386:389
62. Marr BL, Mettelman BB, Bode MM, Gross SJ. Randomized Trial of 42-Day Compared with 9-Day Courses of Dexamethasone for the Treatment of Evolving Bronchopulmonary Dysplasia in Extremely Preterm Infants. *J Pediatr*. 2019; 211:20-26. e1.
63. Ariagno RL, Sweeney TJ, Baldwin RB, Inguillo D, Martin D: Dexamethasone effects on lung function and risks in 3-week-old ventilatory-dependent preterm infants. *Am Rev Respir Dis* 1987;135:A125.
64. Baden M, Bauer CR, Colle E, Klein G, Taeusch HW Jr, Stern L. A controlled trial of hydrocortisone therapy in infants with respiratory distress syndrome. *Pediatrics*. 1972;50(4): 526-534.
65. Barkemeyer BM, Davey A, Cummings JJ, Pappagallo M, Durand M, Stevens D, et al. Pulse vs. continuous dexamethasone therapy for neonatal chronic lung disease (CLD) in very low birthweight (VLBW) infants. *Pediatric Research*. 2000; Vol. 47, issue 4:276A
66. Biswas S, Buffery J, Enoch H, Bland M, Markiewicz M, Walters D. Pulmonary effects of triiodothyronine (T3) and hydrocortisone (HC) supplementation in preterm infants less than 30 weeks gestation: results of the THORN trial--thyroid hormone replacement in neonates. *Pediatr Res*. 2003;53(1):48-56.
67. Dexamethasone therapy in neonatal chronic lung disease: an international placebo-controlled trial. Collaborative Dexamethasone Trial Group. *Pediatrics*. 1991;88(3):421-427.
68. Silva OP, Kumaran VS, Knoppert DC. Randomized Controlled Trial Comparing Two Regimens of Dexamethasone in the Neonate with Chronic Lung Disease. *Pediatric Research*. 2002; Vol. 53:369A.
69. DeMartini TJ, Muraskas JK. Pulse versus tapered dosing dexamethasone for evolving bronchopulmonary dysplasia (BPD). *Pediatric Research* 1999;45(4):300A.



70. Deng LJ, Peng HB, Gong XQ. Effect of budesonide combined with pulmonary surfactant on severe respiratory distress syndrome in bronchopulmonary dysplasia. *Chin J Neonatol (Chinese)*, 2017,32(5):361- 36
71. Groneck P, Goetze-Speer B, Speer CP. Effects of inhaled beclomethasone compared to systemic dexamethasone on lung inflammation in preterm infants at risk of chronic lung disease. *Pediatr Pulmonol.* 1999;27(6):383-387.
72. Ng PC, Fok TF, Wong GW, Lam CW, Lee CH, Wong MY, et al. Pituitary–adrenal suppression in preterm, very low birth weight infants after inhaled fluticasone propionate treatment. *Journal of Clinical Endocrinology and Metabolism* 1998;83(7):2390–3
73. Papile LA, Tyson JE, Stoll BJ, et al. A multicenter trial of two dexamethasone regimens in ventilator-dependent premature infants. *N Engl J Med.* 1998;338(16):1112-1118
74. Pappagallo M, Abbasi S, Bhutani VK. Respiratory and systemic effects of inhaled dexamethasone on ventilator dependant preterm infants at risk for bronchopulmonary dysplasia. *Indian J Pediatr.* 1998;65(2):273-282.
75. Pokriefka E, Mehdizadeh B, Rabbani A. Inhaled flunisolide in bronchopulmonary dysplasia. *Pediatric Research* 1993;33:341A.
76. Townsend SF, Hale KA, Thilo EH. Early treatment with inhaled steroids does not improve outcome in extremely premature infants with respiratory distress. *Pediatric Research* 1998;43:300A.
